# Supplementary material for: An efficient class of bis-NHC salts: applications in Pd-catalyzed reactions under mild reaction conditions
Source: Royal Society of Chemistry journal article supplement (doi:10.1039/c8ra04094j), 2018-01-01
Supplement: c8ra04094j1.zip [file c8ra04094j1.zip]

## Supporting Information

# An efficient class of bis-NHC salts: applications in Pd-catalyzed reactions under mild reaction conditions

Chien-Cheng Chiu, Hui-Tzu Chiu, Dong-Sheng Lee\* and Ta-Jung Lu

Department of Chemistry, National Chung-Hsing University, Taichung, 402, Taiwan

Fax: 886-4-22862547; E-Mail: dslee@mail.nchu.edu.tw

## Table of Contents

|                                                                                                                              |      |
|------------------------------------------------------------------------------------------------------------------------------|------|
| 1. Experimental Section .....                                                                                                | S2   |
| 1.1. General aspects .....                                                                                                   | S2   |
| 1.2. Experimental procedures and spectral data .....                                                                         | S3   |
| 1.2.1. Synthesis of <i>bis</i> -benzimidazolium salts <b>1</b> .....                                                         | S3   |
| 1.2.2. Synthesis of <b>1c</b> -Ag complex .....                                                                              | S5   |
| 1.2.3. Synthesis of <b>1c</b> -Pd complex .....                                                                              | S5   |
| 1.2.4. Pd-catalyzed the Suzuki-Miyaura coupling reaction .....                                                               | S6   |
| 1.2.5. Pd-catalyzed the Mizoroki-Heck coupling reaction .....                                                                | S13  |
| 1.2.6. Pd-catalyzed the Friedel-Crafts alkylation reaction .....                                                             | S16  |
| 2. References and notes .....                                                                                                | S24  |
| 3. <sup>1</sup> H and <sup>13</sup> C-NMR Spectra of Compounds <b>2</b> , <b>1</b> , <b>5</b> , <b>7</b> and <b>10</b> ..... | S25  |
| 4. X ray crystal structure of complexes <b>1c</b> -Ag and <b>1c</b> -Pd .....                                                | S90  |
| 4.1. X ray crystal structure of <b>1c</b> -Ag complex .....                                                                  | S90  |
| 4.2. X ray crystal structure of <b>1c</b> -Pd complex .....                                                                  | S109 |

## 1. Experimental Section

**1.1. General Aspects.** Anhydrous solvents (PhMe, CH<sub>3</sub>CN, and dioxane) were obtained by distillation over calcium hydride. *t*-BuOH was obtained by distillation over sodium. Pre-coated silica gel 60 F-254, layer thickness 0.2 mm, plates were used for analysis of reactions with detection by 0.5% phosphomolybdic acid solution in 95% EtOH. Merck silica gel 60 (0.040–0.063 μm) was used for chromatography. <sup>1</sup>H and <sup>13</sup>C NMR spectra were recorded on a Varian Mercury-400 spectrometer operating at 400 MHz (<sup>1</sup>H) and 100 MHz (<sup>13</sup>C). Chemical shifts (δ) given in ppm relative to TMS; *J*-values are in Hz. Melting points were determined with a Thermo 1001D digital melting point apparatus and are uncorrected. High-resolution mass spectra were recorded on a Finnigan/Thermo Quest MAT 95XL mass spectrometer. Mass spectra were obtained using either electron impact (EI) or electrospray ionization (ESI) method. Benzimidazole was synthesized according to similar literature procedures.<sup>1</sup>



## 1.2. Experimental procedures and spectral data

### 1.2.1. Synthesis of *bis*-benzimidazolium salts **1**

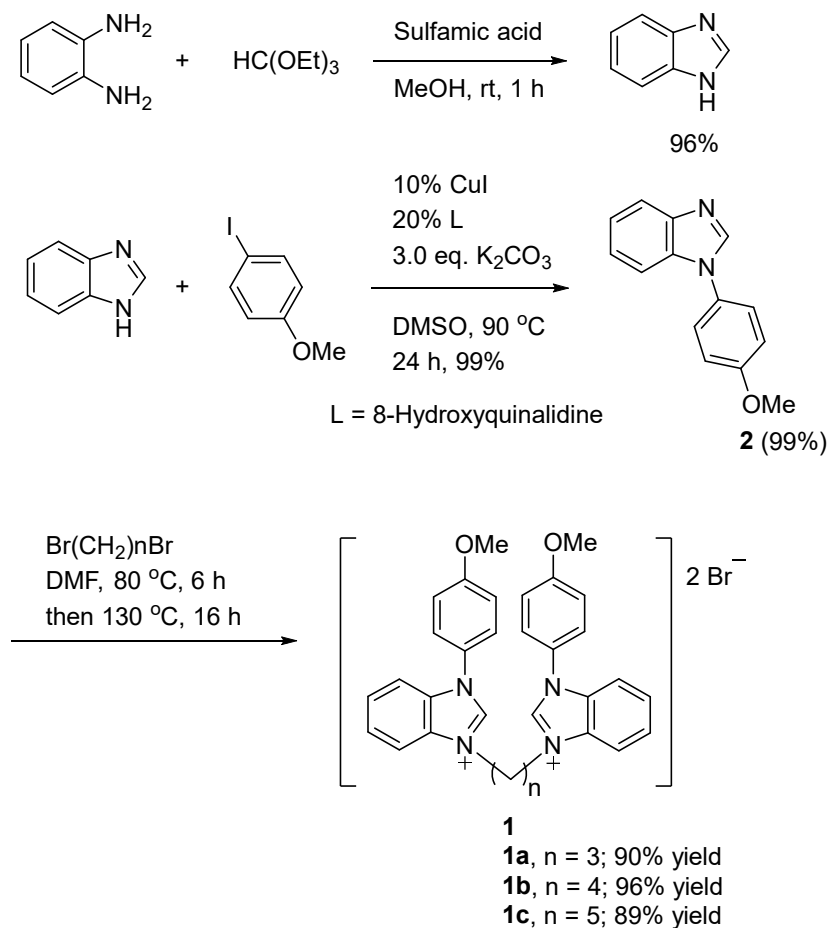

**Scheme 1.** Synthesis of bis-benzimidazolium salts **1**.

### Procedure for the 1-(4-methoxyphenyl)-1*H*-benzo[d]imidazole (**2**)<sup>2</sup>

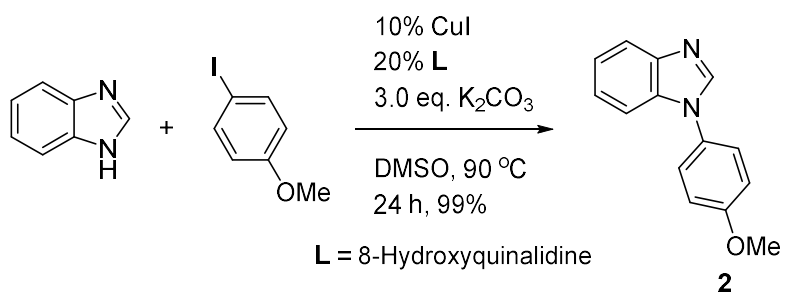

To a mixture of CuI (0.280 g, 1.50 mmol), K<sub>2</sub>CO<sub>3</sub> (6.20 g, 44.9 mmol) and 8-hydroxyquinalidine (0.480 g, 3.00 mmol) in DMSO (15 mL) was added a solution of 4-iodoanisole (3.50 g, 15.0 mmol) and benzimidazole (2.21 g, 18.7 mmol) in DMSO (15 mL) at 30 °C. After stirring for 24 h at 90 °C, the reaction mixture was filtered through a small pad of Celite. The filtrate was treated with H<sub>2</sub>O (30 mL) and EtOAc (30 mL). The aqueous layer was extracted with EtOAc (30 mL×2). The

combined organic layers were dried over  $\text{MgSO}_4$  and then filtered. The solvent was removed under reduced pressure. The residue was purified by column chromatography to give the pure product **2** (3.33 g, 99%) as white solid.  $\text{Mp} = 92\text{--}94\text{ }^\circ\text{C}$ ;  $^1\text{H}$  NMR ( $\text{CDCl}_3$ , 400 MHz):  $\delta$  8.05 (s, 1H), 7.89–7.86 (m, 1H), 7.47–7.44 (m, 1H), 7.42 (d,  $J = 8.8$  Hz, 2H), 7.35–7.30 (m, 2H), 7.08 (d,  $J = 8.8$  Hz, 2H);  $^{13}\text{C}$  NMR ( $\text{CDCl}_3$ , 100 MHz):  $\delta$  158.9, 143.5, 142.2, 133.8, 128.7, 125.3, 123.2, 122.2, 120.1, 114.7, 110.0, 55.3.

### General procedures for the bis-benzimidazolium salts (**1**)<sup>3</sup>

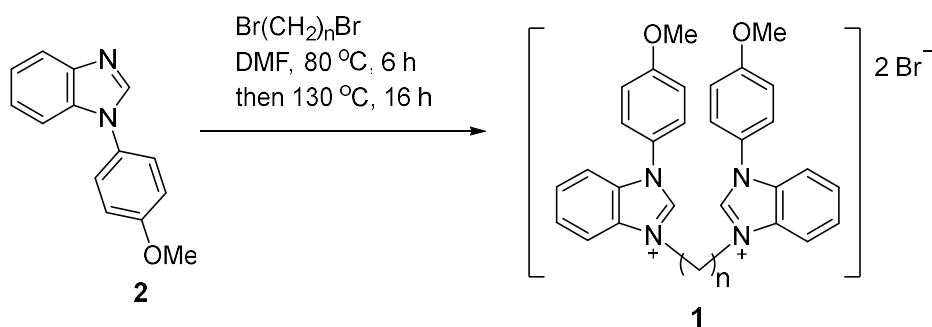

To a solution of 1-(4-methoxyphenyl)-1*H*-benzo[d]imidazole **2** (4.46 mmol) in DMF (9.0 mL) was added dibromoalkane (2.23 mmol). After stirring for 6 h at 80  $^\circ\text{C}$ , the resulting solution was heated at 130 $^\circ\text{C}$  for 16 h. The reaction mixture was cooled to room temperature. The *bis*-benzimidazolium salt precipitate was filtered off and washed with EtOH.

#### 3,3'-(propane-1,3-diyl)bis(1-(4-methoxyphenyl)-1*H*-benzo[d]imidazol-3-ium) bromide (**1a**)

Yield 90% (1.30 g); purple powder;  $\text{Mp} = 260\text{--}262\text{ }^\circ\text{C}$  (dec.);  $^1\text{H}$  NMR ( $\text{CD}_3\text{OD}$ , 400 MHz):  $\delta$  8.20 (d,  $J = 8.8$  Hz, 2H), 7.80–7.72 (m, 10H), 7.24 (d,  $J = 9.2$  Hz, 4H), 3.91 (s, 6H), 4.93 (t,  $J = 7.6$  Hz, 4H), 2.97 (quin,  $J = 7.6$  Hz, 2H);  $^{13}\text{C}$  NMR ( $\text{CD}_3\text{OD}$ , 100 MHz):  $\delta$  162.8, 133.5, 132.9, 129.0, 128.7, 127.9, 127.0, 116.6, 114.9, 114.8, 56.4, 45.9, 29.8; HRMS-ESI ( $m/z$ )  $[\text{M}-\text{Br}]^+$  calcd for  $\text{C}_{31}\text{H}_{30}\text{BrN}_4\text{O}_2$ : 569.1547, found: 569.1552.

#### 4,4'-(butane-1,4-diyl)bis(1-(4-methoxyphenyl)-1*H*-benzo[d]imidazol-3-ium) bromide (**1b**)

Yield 96% (1.42 g); pale-purple powder;  $\text{Mp} = 264\text{--}266\text{ }^\circ\text{C}$  (dec.);  $^1\text{H}$  NMR ( $\text{CD}_3\text{OD}$ , 400 MHz):  $\delta$  8.14 (d,  $J = 8.8$  Hz, 2H), 7.77–7.71 (m, 10H), 7.23 (d,  $J = 8.8$  Hz, 4H), 4.75 (t,  $J = 7.6$  Hz, 4H), 3.91 (s, 6H), 2.33 (quin,  $J = 7.6$  Hz, 4H);  $^{13}\text{C}$  NMR ( $\text{CD}_3\text{OD}$ , 100 MHz):  $\delta$  162.9, 133.5, 132.9, 128.9,

128.6, 127.9, 116.6, 114.9, 114.7, 56.4, 48.1, 27.3; HRMS-ESI ( $m/z$ )  $[M-Br]^+$  calcd for  $C_{32}H_{32}BrN_4O_2$ : 583.1703, found: 583.1705.

**5,5'-(pentane-1,5-diyl)bis(1-(4-methoxyphenyl)-1*H*-benzo[d]imidazol-3-ium) bromide (1c)**

Yield 89% (1.35 g); white powder; Mp = 172–176 °C;  $^1H$  NMR ( $CD_3OD$ , 400 MHz):  $\delta$  8.09 (d,  $J$  = 8.0 Hz, 2H), 7.79–7.69 (m, 10H), 7.25 (d,  $J$  = 9.2 Hz, 4H), 4.67 (t,  $J$  = 7.6 Hz, 4H), 3.92 (s, 6H), 2.22 (quin,  $J$  = 7.6 Hz, 4H), 1.72–1.70 (quin,  $J$  = 7.6 Hz, 2H);  $^{13}C$  NMR ( $CD_3OD$ , 100 MHz):  $\delta$  162.8, 133.5, 132.9, 128.9, 128.5, 127.9, 127.1, 116.6, 114.9, 114.7, 56.4, 48.5, 29.7, 24.7; HRMS-ESI ( $m/z$ )  $[M-Br]^+$  calcd for  $C_{33}H_{34}BrN_4O_2$ : 597.1860, found: 597.1865.

**1.2.2. Synthesis of 1c–Ag complex<sup>4</sup>**

To a 50 mL of round-bottom flask, bis-NHC **1c** (0.420 g, 0.620 mmol) and silver(I) oxide (0.430 g, 1.85 mmol) in distilled water (21 mL) was allowed to stir for 18 h at room temperature with exclusion of light. The suspension was filtered through celite and the filtrate was collected in a conical flask. To the conical flask,  $KPF_6$  (0.340 g, 1.85 mmol) was added with the instant formation of gray precipitate, the resulting suspension was stirred for 1 h and filtered through filter paper. The filtrate was dried under vacuum to afford **1c–Ag** complex in 80% yield as gray solid. Mp = 178–182 °C (dec.);  $^1H$  NMR ( $DMSO-d_6$ , 400 MHz):  $\delta$  8.05 (d,  $J$  = 8.0 Hz, 4H), 7.69 (t,  $J$  = 7.6 Hz, 4H), 7.60–7.51 (m, 8H), 7.02 (d,  $J$  = 8.0 Hz, 8H), 6.21 (d,  $J$  = 7.6 Hz, 8H), 4.23 (br, 8H), 3.65 (s, 12H), 1.64 (br, 8H), 0.56 (br, 4H);  $^{13}C$  NMR ( $DMSO-d_6$ , 100 MHz):  $\delta$  159.8, 134.5, 133.3, 130.1, 126.9, 126.0, 125.6, 114.6, 113.2, 112.8, 56.0, 50.1, 28.7, 23.6.

**1.2.3. Synthesis of 1c–Pd complex**

To a 100 mL double-necked round-bottom flask (RBF),  $Pd(MeCN)_2Cl_2$  (48.6 mg, 0.187 mmol) was charged in and dissolved with acetonitrile (30 mL), the solution of **1c–Ag** (120 mg, 0.0780 mmol) dissolved in acetonitrile (13 mL) was injected into the aforementioned double-necked RBF with syringe and auto-injector within 1 h at room temperature with exclusion of light. After stirring for 24 h at room temperature in dark, the resulting suspension was filtered through celite. The filtrate was dried under vacuum to afford Pd complex (89.1 mg) in 82% yield as yellow solid. Crystals suitable for X-ray diffraction were obtained by method of slow cooling in  $CH_2Cl_2$ .  $^1H$  NMR ( $CD_2Cl_2$ ,

400 MHz):  $\delta$  7.65 (d,  $J$  = 8.0 Hz, 4H), 7.55 (t,  $J$  = 8.0 Hz, 4H), 7.43 (t,  $J$  = 8.0 Hz, 4H), 7.33 (d,  $J$  = 8.0 Hz, 4H), 7.21 (br, 8H), 6.16 (br, 8H), 4.71–4.63 (m, 4H), 4.28–4.22 (m, 4H), 3.70 (s, 12H), 1.80–1.65 (m, 8H), 1.30–1.24 (m, 4H);  $^{13}\text{C}$  NMR ( $\text{CD}_2\text{Cl}_2$ , 100 MHz):  $\delta$  175.8, 160.2, 135.8, 133.7, 129.8, 128.2, 125.0, 124.8, 114.3, 112.1, 111.8, 37.0, 27.9, 27.6.

#### 1.2.4. Pd-catalyzed the Suzuki–Miyaura coupling reaction

*General Procedures for Suzuki–Miyaura Coupling Reaction of Pd catalysts loading ranging from 0.5–1.0 mol%:* A stock solution of  $\text{Pd}(\text{OAc})_2$  (11.3 mg, 0.0500 mmol), bis-NHC **1c** (33.9 mg, 0.0500 mmol) and  $\text{K}_3\text{PO}_4 \cdot \text{H}_2\text{O}$  (57.5 mg, 0.250 mmol) in freshly distilled *t*-butanol (5.0 mL) was initially prepared with continuous stirring at 60 °C for 1 h. Arylboronic acid **4** (1.50 mmol), aryl bromide **3** (1.00 mmol),  $\text{K}_3\text{PO}_4 \cdot \text{H}_2\text{O}$  (3.00 mmol) were charged to the Schlenk tube with treatment of carefully evacuated and backfilled with nitrogen for 3 times. Stock solution of palladium complex (as indicated) was added to the Schlenk tube and then dry *t*-butanol was added up to final volume 3.0 mL. The mixture was stirred at room temperature for 24 h. After completion of the reaction, the reaction was quenched with water (3.0 mL). The aqueous layer was extracted with EtOAc (3.0 mL $\times$ 3), the combined organic layers were dried over anhydrous  $\text{MgSO}_4$  and then filtered. The solvent was evaporated under reduced pressure and the corresponding crude product of the Suzuki–Miyaura coupling reaction was purified by chromatography.

*General Procedures for Suzuki–Miyaura Coupling Reaction of 0.005 mol% Pd catalysts loading:* A stock solution of  $\text{Pd}(\text{OAc})_2$  (2.23 mg, 0.0100 mmol), bis-NHC **1c** (6.78 mg, 0.0100 mmol) and  $\text{K}_3\text{PO}_4 \cdot \text{H}_2\text{O}$  (11.5 mg, 0.250 mmol) in freshly distilled *t*-butanol (5.0 mL) was initially prepared with continuous stirring at 60 °C for 1 h. The stock solution was diluted to 100X working solution. Arylboronic acid **4** (1.50 mmol), aryl bromide **3** (1.00 mmol),  $\text{K}_3\text{PO}_4 \cdot \text{H}_2\text{O}$  (3.00 mmol) were charged to the Schlenk tube with treatment of carefully evacuated and backfilled with nitrogen for 3 times. Working solution of palladium complex was added to the Schlenk tube and then dry *t*-butanol was added up to final volume 3.0 mL. The mixture was stirred at room temperature for 24 h. After completion of the reaction, the reaction was quenched with water (3.0 mL). The aqueous layer was extracted with EtOAc (3.0 mL $\times$ 3), the combined organic layers were dried over anhydrous

MgSO<sub>4</sub> and then filtered. The solvent was evaporated under reduced pressure and the corresponding crude product of the Suzuki–Miyaura coupling reaction was purified by chromatography.

*General Procedures for Suzuki–Miyaura Coupling Reaction of 0.0005 mol% Pd catalysts loading:*

A stock solution of Pd(OAc)<sub>2</sub> (2.23 mg, 0.01 mmol), bis-NHC **1c** (6.78 mg, 0.01 mmol) and K<sub>3</sub>PO<sub>4</sub>·H<sub>2</sub>O (11.5 mg, 0.25 mmol) in freshly distilled *t*-butanol (5.0 mL) was initially prepared with continuous stirring at 60 °C for 1 h. The stock solution was diluted to 1000X working solution by sequential dilution. Arylboronic acid **4** (1.50 mmol), aryl bromide **3** (1.00 mmol), K<sub>3</sub>PO<sub>4</sub>·H<sub>2</sub>O (3.00 mmol) were charged to the Schlenk tube with treatment of carefully evacuated and backfilled with nitrogen for 3 times. Working solution of palladium complex was added to the Schlenk tube and then dry *t*-butanol was added up to final volume 3.0 mL. The mixture was stirred at room temperature for 24 h. After completion of the reaction, the reaction was quenched with water (3.0 mL). The aqueous layer was extracted with EtOAc (3.0 mL×3), the combined organic layers were dried over anhydrous MgSO<sub>4</sub> and then filtered. The solvent was evaporated under reduced pressure and the corresponding crude product of the Suzuki–Miyaura coupling reaction was purified by chromatography.

*General Procedures for Suzuki–Miyaura Coupling Reaction of 0.00005 mol% Pd catalysts loading:*

A stock solution of Pd(OAc)<sub>2</sub> (2.23 mg, 0.01 mmol), bis-NHC **1c** (6.78 mg, 0.01 mmol) and K<sub>3</sub>PO<sub>4</sub>·H<sub>2</sub>O (11.5 mg, 0.25 mmol) in freshly distilled *t*-butanol (5.0 mL) was initially prepared with continuous stirring at 60 °C for 1 h. The stock solution was diluted to 10000X working solution by sequential dilution. Arylboronic acid **4** (1.50 mmol), aryl bromide **3** (1.00 mmol), K<sub>3</sub>PO<sub>4</sub>·H<sub>2</sub>O (3.00 mmol) were charged to the Schlenk tube with treatment of carefully evacuated and backfilled with nitrogen for 3 times. Working solution of palladium complex was added to the Schlenk tube and then dry *t*-butanol was added up to final volume 3.0 mL. The mixture was stirred at room temperature for 24 h. After completion of the reaction, the reaction was quenched with water (3.0 mL). The aqueous layer was extracted with EtOAc (3.0 mL×3), the combined organic layers were dried over anhydrous MgSO<sub>4</sub> and then filtered. The solvent was evaporated under reduced pressure and the corresponding crude product of the Suzuki–Miyaura coupling reaction was purified by

chromatography.

**4-methoxybiphenyl (5aa)<sup>5</sup>** (table 2, entry 1)

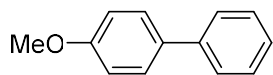

This compound was prepared from 4-bromoanisole **3a** and phenylboronic acid **4a** in 99% yield (0.183 g). <sup>1</sup>H NMR (CDCl<sub>3</sub>, 400 MHz): δ 7.57–7.52 (m, 4H), 7.42 (t, *J* = 7.6 Hz, 2H), 7.30 (t, *J* = 7.2 Hz, 1H), 6.99 (d, *J* = 8.4 Hz, 2H), 3.86 (s, 3H); <sup>13</sup>C NMR (CDCl<sub>3</sub>, 100 MHz): δ 159.1, 140.8, 133.7, 128.7, 128.1, 126.7, 126.6, 114.2, 55.3.

**4-tert-butylbiphenyl (5ba)<sup>5</sup>** (table 2, entry 4)

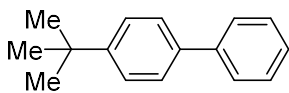

This compound was prepared from 1-bromo-4-tert-butylbenzene **3b** and phenylboronic acid **4a** in 99% yield (0.209 g). <sup>1</sup>H NMR (CDCl<sub>3</sub>, 400 MHz): δ 7.59 (d, *J* = 8.0 Hz, 2H), 7.54 (d, *J* = 8.0 Hz, 2H), 7.47 (d, *J* = 8.0 Hz, 2H), 7.42 (t, *J* = 7.6 Hz, 2H), 7.32 (t, *J* = 7.4 Hz, 1H), 1.36 (s, 9H); <sup>13</sup>C NMR (CDCl<sub>3</sub>, 100 MHz): δ 150.1, 141.0, 138.3, 128.7, 127.0, 126.9, 126.8, 125.7, 34.4, 31.3.

**methyl biphenyl-4-carboxylate (5ca)<sup>5</sup>** (table 2, entry 5)

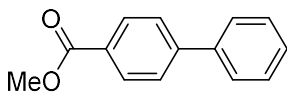

This compound was prepared from methyl 4-bromobenzoate **3c** and phenylboronic acid **4a** in 98% yield (0.208 g). <sup>1</sup>H NMR (CDCl<sub>3</sub>, 400 MHz): δ 8.11 (d, *J* = 8.4 Hz, 2H), 7.67 (d, *J* = 8.4 Hz, 2H), 7.63 (d, *J* = 8.8 Hz, 2H), 7.47 (t, *J* = 7.4 Hz, 2H), 7.41 (t, *J* = 7.2 Hz, 1H), 3.94 (s, 3H); <sup>13</sup>C NMR (CDCl<sub>3</sub>, 100 MHz): δ 166.9, 145.6, 139.9, 130.0, 128.9, 128.8, 128.1, 127.2, 127.0, 52.1.

**1-([1,1'-biphenyl]-4-yl)ethanone (5da)<sup>5</sup>** (table 2, entry 6)

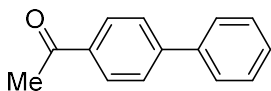

This compound was prepared from 4-bromoacetophenone **3d** and phenylboronic acid **4a** in 99% yield (0.194 g). <sup>1</sup>H NMR (CDCl<sub>3</sub>, 400 MHz): δ 8.04 (d, *J* = 8.4 Hz, 2H), 7.67 (d, *J* = 8.4 Hz, 2H), 7.63 (d, *J* = 7.6 Hz, 2H), 7.49 (t, *J* = 7.6 Hz, 2H), 7.41 (t, *J* = 7.6 Hz, 1H), 2.65 (s, 3H); <sup>13</sup>C NMR (CDCl<sub>3</sub>, 100 MHz): δ 197.6, 145.6, 139.7, 135.7, 128.87, 128.82, 128.1, 127.2, 127.1, 26.6.

**4'-phenylpropiophenone (5ea)<sup>5</sup>** (table 2, entry 9)

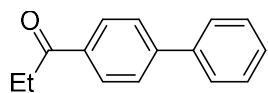

This compound was prepared from 1-(4-bromophenyl)-1-propanone **3e** and phenylboronic acid **4a** in 99% yield (0.209 g). <sup>1</sup>H NMR (CDCl<sub>3</sub>, 400 MHz): δ 8.04 (d, *J* = 8.4 Hz, 2H), 7.68 (d, *J* = 8.4 Hz, 2H), 7.63 (d, *J* = 8.0 Hz, 2H), 7.47 (t, *J* = 8.0 Hz,

2H), 7.40 (t,  $J = 8.0$  Hz, 1H), 3.04 (q,  $J = 7.2$ , 2H), 1.26 (t,  $J = 7.2$ , 3H);  $^{13}\text{C}$  NMR ( $\text{CDCl}_3$ , 100 MHz):  $\delta$  200.4, 145.5, 139.9, 135.6, 128.9, 128.5, 128.1, 127.2, 127.2, 31.8, 8.3.

**3'-phenylpropiophenone (5fa)**<sup>5</sup> (table 2, entry 12)

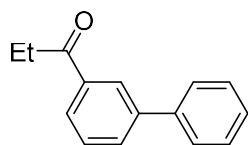

This compound was prepared from 3'-bromopropiophenone **3f** and phenylboronic acid **4a** in 99% yield (0.209 g).  $^1\text{H}$  NMR ( $\text{CDCl}_3$ , 400 MHz):  $\delta$  8.20 (t,  $J = 1.8$  Hz, 1H), 7.95 (td,  $J = 7.6$ , 1.3 Hz, 1H), 7.78 (td,  $J = 7.6$ , 1.5 Hz, 1H), 7.64–7.62 (m, 2H), 7.54 (t,  $J = 7.6$  Hz, 1H), 7.50–7.46 (m, 2H), 7.39 (td,  $J = 7.6$ , 1.2 Hz, 1H), 3.07 (q,  $J = 7.2$  Hz, 2H), 1.26 (t,  $J = 7.2$  Hz, 3H);  $^{13}\text{C}$  NMR ( $\text{CDCl}_3$ , 100 MHz):  $\delta$  200.1, 141.2, 139.8, 137.1, 131.0, 128.7, 128.6, 127.5, 126.8, 126.5, 126.2, 31.5, 7.9.

**3'-phenylpropiophenone (5ga)**<sup>6</sup> (table 2, entry 13)

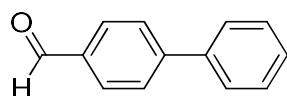

This compound was prepared from 3'-bromopropiophenone **3g** and phenylboronic acid **4a** in 99% yield (0.180 g).  $^1\text{H}$  NMR ( $\text{CDCl}_3$ , 400 MHz):  $\delta$  10.06 (s, 1H), 7.97–7.95 (m, 2H), 7.77–7.74 (m, 2H), 7.66–7.63 (m, 2H), 7.51–7.41 (m, 3H);  $^{13}\text{C}$  NMR ( $\text{CDCl}_3$ , 100 MHz):  $\delta$  192.0, 147.2, 139.7, 135.1, 130.3, 129.0, 128.5, 127.7, 127.4, 127.3.

**2-phenylbenzaldehyde (5ha)**<sup>5</sup> (table 2, entry 14)

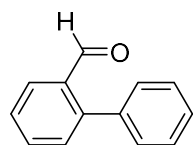

This compound was prepared from 2-bromobenzaldehyde **3h** and phenylboronic acid **4a** in 84% yield (0.153 g).  $^1\text{H}$  NMR ( $\text{CDCl}_3$ , 400 MHz):  $\delta$  9.99 (d,  $J = 0.8$  Hz, 1H), 8.04 (dd,  $J = 7.8$ , 1.3 Hz, 1H), 7.64 (td,  $J = 7.5$ , 1.5 Hz, 1H), 7.55–7.43 (m, 5H), 7.41–7.36 (m, 2H);  $^{13}\text{C}$  NMR ( $\text{CDCl}_3$ , 100 MHz):  $\delta$  192.4, 145.9, 137.7, 133.6, 133.5, 130.7, 130.0, 128.4, 128.1, 127.7, 127.5.

**2,4-dinitro-1,1'-biphenyl (5ia)**<sup>5</sup> (table 2, entry 15)

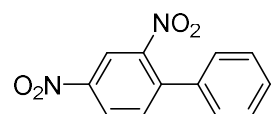

This compound was prepared from 1-bromo-2,4-dinitrobenzene **3i** and phenylboronic acid **4a** in 99% yield (0.242 g).  $^1\text{H}$  NMR ( $\text{CDCl}_3$ , 400 MHz):  $\delta$  8.72 (d,  $J = 2.4$  Hz, 1H), 8.47 (dd,  $J = 2.4$ , 8.4 Hz, 1H), 7.68 (d,  $J = 8.4$  Hz, 1H), 7.50–7.48 (m, 3H), 7.36–7.33 (m, 2H);  $^{13}\text{C}$  NMR ( $\text{CDCl}_3$ , 100 MHz):  $\delta$  148.9, 146.7, 142.1, 135.1, 133.2, 129.4, 129.0, 127.6, 126.4, 119.6.

**2-methyl-1,1'-biphenyl (5ja)**<sup>5</sup> (table 2, entry 16)

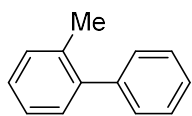

This compound was prepared from 1-bromo-2-methylbenzene **3j** and phenylboronic acid **4a** in 70% yield (0.118 g).  $^1\text{H}$  NMR ( $\text{CDCl}_3$ , 400 MHz):  $\delta$  7.60 (d,  $J = 7.2$  Hz, 1H), 7.45 (t,  $J = 7.6$  Hz, 1H), 7.41 (d,  $J = 7.2$  Hz, 1H), 7.37–7.32 (m, 3H), 7.28–7.23 (m, 3H), 2.28 (s, 3H);  $^{13}\text{C}$  NMR ( $\text{CDCl}_3$ , 100 MHz):  $\delta$  130.3, 129.8, 129.2, 128.7, 128.0, 127.21, 127.15, 126.7, 125.7, 20.4.

**2,6-dimethyl-1,1'-biphenyl (5ka)**<sup>5</sup> (table 2, entry 17)

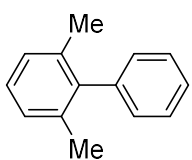

This compound was prepared from 1-bromo-2,6-dimethylbenzene **3k** and phenylboronic acid **4a** in 85% yield (0.155 g).  $^1\text{H}$  NMR ( $\text{CDCl}_3$ , 400 MHz):  $\delta$  7.47 (d,  $J = 7.2$  Hz, 1H), 7.32–7.27 (m, 2H), 7.22–7.18 (m, 1H), 7.06–6.98 (m, 4H), 1.92 (s, 6H);  $^{13}\text{C}$  NMR ( $\text{CDCl}_3$ , 100 MHz):  $\delta$  141.8, 141.2, 141.0, 136.0, 129.0, 128.7, 128.4, 127.24, 127.19, 127.1, 127.0, 126.6, 20.8.

**2-methyl-1-phenylnaphthalene (5la)**<sup>5</sup> (table 2, entry 18)

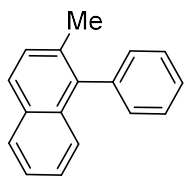

This compound was prepared from 1-bromo-2-methylnaphthalene **3l** and phenylboronic acid **4a** in 99% yield (0.216 g).  $^1\text{H}$  NMR ( $\text{CDCl}_3$ , 400 MHz):  $\delta$  7.84 (d,  $J = 8.4$  Hz, 1H), 7.79 (d,  $J = 8.4$  Hz, 1H), 7.60 (d,  $J = 8.0$  Hz, 1H), 7.38–7.32 (m, 8H), 2.24 (s, 3H);  $^{13}\text{C}$  NMR ( $\text{CDCl}_3$ , 100 MHz):  $\delta$  139.8, 138.1, 133.1, 132.9, 131.9, 130.1, 128.7, 128.6, 128.4, 127.7, 127.18, 127.14, 127.0, 126.1, 125.8, 124.7, 20.8.

**2-methoxy-1-phenylnaphthalene (5ma)**<sup>5</sup> (table 2, entry 19)

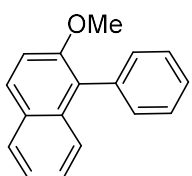

This compound was prepared from 1-bromo-2-methoxynaphthalene **3m** and phenylboronic acid **4a** in 99% yield (0.232 g).  $^1\text{H}$  NMR ( $\text{CDCl}_3$ , 400 MHz):  $\delta$  7.88 (d,  $J = 8.8$  Hz, 1H), 7.83–7.81 (m, 1H), 7.52–7.48 (m, 3H), 7.44 (d,  $J = 7.6$  Hz, 1H), 7.38–7.32 (m, 5H), 3.83 (s, 3H);  $^{13}\text{C}$  NMR ( $\text{CDCl}_3$ , 100 MHz):  $\delta$  153.7, 136.4, 133.6, 130.9, 129.04, 128.98, 128.1, 127.8, 127.0, 126.27, 126.26, 125.2, 123.5, 113.8, 56.7.

**2,3-dimethoxy-1-phenylnaphthalene (5na)** (table 2, entry 20)

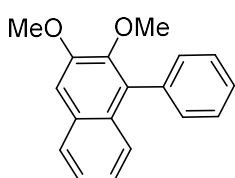

This compound was prepared from 1-bromo-2,3-dimethoxynaphthalene **3n** and phenylboronic acid **4a** in 99% yield (0.262 g). White solid; Mp = 108–110 °C;  $^1\text{H}$  NMR ( $\text{CDCl}_3$ , 400 MHz):  $\delta$  7.89 (d,  $J = 8.0$  Hz, 1H), 7.66–7.63 (m, 3H), 7.59–7.58 (m, 3H), 7.53 (t,  $J = 8.0$  Hz, 1H), 7.40–7.37 (m, 2H), 4.11 (s, 3H), 3.81 (s, 3H);  $^{13}\text{C}$  NMR ( $\text{CDCl}_3$ , 100 MHz):  $\delta$  151.9, 146.2, 135.8, 131.9, 131.1, 130.3, 128.4,



127.9, 127.1, 126.4, 125.5, 125.0, 123.7, 106.6, 60.7, 55.4; HRMS-EI ( $m/z$ ) [ $M^+$ ] calcd for  $C_{18}H_{16}O_2$ : 264.1150, found: 264.1155.

**[1,1'-biphenyl]-4-amine (50a)**<sup>7</sup> (table 2, entry 21)

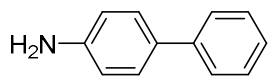

This compound was prepared from 4-bromoaniline **3o** and phenylboronic acid **4a** in 99% yield (0.168 g). Brown solid; <sup>1</sup>H NMR ( $CDCl_3$ , 400 MHz):

7.55–7.52 (m, 2H), 7.43–7.37 (m, 4H), 7.29–7.25 (m, 1H), 6.76 (d,  $J$  = 8.4 Hz, 2H), 3.74 (s, 2H);

<sup>13</sup>C NMR ( $CDCl_3$ , 100 MHz):  $\delta$  145.7, 140.9, 131.1, 128.5, 127.7, 126.12, 126.05, 115.2.

***N,N*-dimethyl-[1,1'-biphenyl]-2-amine (5pa)**<sup>8</sup> (table 2, entry 22)

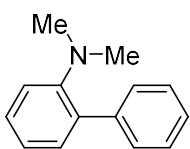

This compound was prepared from 2-bromo-*N,N*-dimethylaniline **3p** and phenylboronic acid **4a** in 70% yield (0.138 g). White solid; <sup>1</sup>H NMR ( $CDCl_3$ , 400

MHz):  $\delta$  7.58–7.56 (m, 2H), 7.40–7.31 (m, 3H), 7.30–7.21 (m, 2H), 7.04–7.00 (m,

2H), 2.54 (s, 6H); <sup>13</sup>C NMR ( $CDCl_3$ , 100 MHz):  $\delta$  151.1, 141.9, 134.1, 131.6, 128.6, 128.2, 128.0,

126.4, 121.4, 117.5, 43.3.

**1-benzyl-2-methylbenzene (5qa)**<sup>9</sup> (table 2, entry 23)

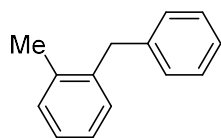

This compound was prepared from 1-(bromomethyl)-2-methylbenzene **3q** and phenylboronic acid **4a** in 89% yield (0.162 g). Colorless oil; <sup>1</sup>H NMR ( $CDCl_3$ ,

400 MHz):  $\delta$  7.27–7.25 (m, 2H), 7.19–7.10 (m, 7H), 3.99 (s, 2H), 2.25 (s, 3H);

<sup>13</sup>C NMR ( $CDCl_3$ , 100 MHz):  $\delta$  140.3, 138.8, 136.5, 130.2, 129.9, 128.7, 128.3, 126.4, 125.9, 125.8, 39.4, 19.6.

**1-benzyl-4-methylbenzene (5ra)**<sup>9</sup> (table 2, entry 24)

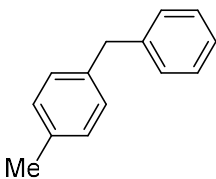

This compound was prepared from 1-(bromomethyl)-4-methylbenzene **3r** and phenylboronic acid **4a** in 77% yield (0.140 g). Colorless oil; <sup>1</sup>H NMR ( $CDCl_3$ ,

400 MHz):  $\delta$  7.29–7.09 (m, 9H), 3.94 (s, 2H), 2.31 (s, 3H); <sup>13</sup>C NMR ( $CDCl_3$ ,

100 MHz):  $\delta$  141.4, 138.1, 135.5, 129.1, 128.9, 128.8, 128.4, 126.0, 41.5, 21.0.

**1-(4-methoxyphenyl)naphthalene (5ab)**<sup>10</sup> (table 2, entry 25)

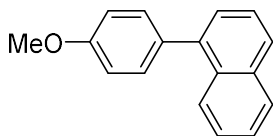

This compound was prepared from 4-bromoanisole **3a** and 1-naphthylboronic acid **4b** in 99% yield (0.232 g). White solid; <sup>1</sup>H NMR

( $CDCl_3$ , 400 MHz):  $\delta$  7.91 (t,  $J$  = 8.8 Hz, 2H), 7.84 (d,  $J$  = 8.0 Hz, 1H),

7.53–7.47 (m, 2H), 7.45–7.40 (m, 4H), 7.04 (d,  $J$  = 8.8 Hz, 2H), 3.90 (s, 3H); <sup>13</sup>C NMR ( $CDCl_3$ ,

100 MHz):  $\delta$  158.8 139.8, 133.8, 133.0, 131.7, 131.0, 128.2, 127.3, 126.8, 126.0, 125.9, 125.6, 125.3, 113.6, 55.2.

**1-(4-(*tert*-butyl)phenyl)naphthalene (5bb)<sup>11</sup>** (table 2, entry 26)

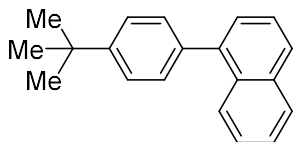

This compound was prepared from 1-bromo-4-*tert*-butylbenzene **3b** and 1-naphthylboronic acid **4b** in 96% yield (0.250 g). White solid; <sup>1</sup>H NMR (CDCl<sub>3</sub>, 400 MHz):  $\delta$  7.96 (d, *J* = 8.4 Hz, 1H), 7.90 (d, *J* = 8.0 Hz, 1H), 7.85 (d, *J* = 8.4 Hz, 1H), 7.54–7.41 (m, 8H), 1.41 (s, 9H); <sup>13</sup>C NMR (CDCl<sub>3</sub>, 100 MHz):  $\delta$  149.9, 140.2, 137.8, 133.8, 131.7, 129.7, 128.2, 127.4, 126.9, 126.2, 125.9, 125.7, 125.4, 125.1, 34.5, 31.5.

**methyl 4-(naphthalen-1-yl)benzoate (5cb)<sup>10</sup>** (table 2, entry 27)

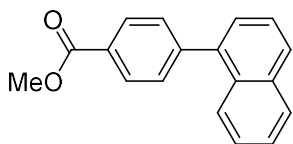

This compound was prepared from methyl 4-bromobenzoate **3c** and 1-naphthylboronic acid **4b** in 97% yield (0.254 g). White solid; <sup>1</sup>H NMR (CDCl<sub>3</sub>, 400 MHz):  $\delta$  8.17 (d, *J* = 8.4, Hz, 2H), 7.92 (d, *J* = 8.8 Hz, 1H), 7.90 (d, *J* = 8.8 Hz, 1H), 7.84 (d, *J* = 8.4 Hz, 1H), 7.58 (d, *J* = 8.8 Hz, 2H), 7.56–7.49 (m, 2H), 7.47–7.42 (m, 2H), 3.98 (s, 3H); <sup>13</sup>C NMR (CDCl<sub>3</sub>, 100 MHz):  $\delta$  166.7, 145.3, 138.8, 133.6, 130.9, 129.9, 129.4, 128.8, 128.2, 128.1, 126.7, 126.1, 125.7, 125.3, 125.1, 51.9.

**1-(4-(naphthalen-1-yl)phenyl)ethan-1-one (5db)<sup>12</sup>** (table 2, entry 28)

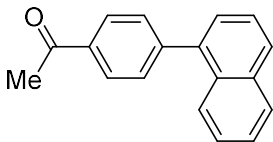

This compound was prepared from 4-bromoacetophenone **3d** and 1-naphthylboronic acid **4b** in 95% yield (0.234 g). Orange solid; <sup>1</sup>H NMR (CDCl<sub>3</sub>, 400 MHz):  $\delta$  8.10 (d, *J* = 8.0 Hz, 2H), 7.93 (d, *J* = 8.8 Hz, 1H), 7.90 (d, *J* = 8.8 Hz, 1H), 7.84 (d, *J* = 8.4 Hz, 1H), 7.61 (d, *J* = 8.0 Hz, 2H), 7.57–7.42 (m, 4H), 2.69 (s, 3H); <sup>13</sup>C NMR (CDCl<sub>3</sub>, 100 MHz):  $\delta$  197.5, 145.4, 138.6, 135.6, 133.5, 130.1, 130.0, 128.2, 128.1, 126.7, 126.1, 125.7, 125.2, 125.1, 26.4.

**1-(4-(naphthalen-1-yl)phenyl)propan-1-one (5eb)** (table 2, entry 29)

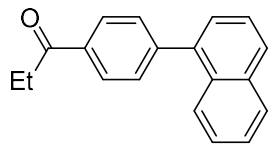

This compound was prepared from 1-(4-bromophenyl)-1-propanone **3e** and 1-naphthylboronic acid **4b** in 99% yield (0.258 g). White solid; Mp = 110–112 °C; <sup>1</sup>H NMR (CDCl<sub>3</sub>, 400 MHz):  $\delta$  8.10 (d, *J* = 8.0 Hz, 2H), 7.93 (d, *J* = 8.8 Hz, 1H), 7.90 (d, *J* = 8.8 Hz, 1H), 7.85 (d, *J* = 8.4 Hz, 1H), 7.60 (d, *J* = 8.0 Hz, 2H), 7.56–7.50 (m, 2H), 7.47–7.42 (m, 2H), 3.09 (q, *J* = 7.2 Hz, 2H), 1.29 (t, *J* = 7.2 Hz, 3H); <sup>13</sup>C NMR (CDCl<sub>3</sub>, 100 MHz):  $\delta$  199.9, 145.1, 138.7, 135.3, 133.5, 130.8, 129.9, 128.1, 128.0, 127.7, 126.6, 126.1,

125.7, 125.2, 125.1, 31.5, 8.0; HRMS-EI ( $m/z$ ) [ $M^+$ ] calcd for  $C_{19}H_{16}O$ : 260.1201, found: 260.1196.

**1-(3-(naphthalen-1-yl)phenyl)propan-1-one (5fb)** (table 2, entry 30)

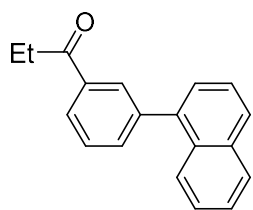

This compound was prepared from 1-(3-bromophenyl)-1-propanone **3f** and 1-naphthylboronic acid **4b** in 96% yield (0.250 g). Yellow oil;  $^1H$  NMR ( $CDCl_3$ , 400 MHz):  $\delta$  8.09 (s, 1H), 8.04 (d,  $J = 7.6$  Hz, 1H), 7.93 (d,  $J = 8.8$  Hz, 1H), 7.90 (d,  $J = 8.8$  Hz, 1H), 7.81 (d,  $J = 8.4$  Hz, 1H), 7.69 (d,  $J = 7.6$  Hz, 1H), 7.42–7.61 (m, 5H), 3.05 (q,  $J = 7.2$  Hz, 2H), 1.25 (t,  $J = 7.2$  Hz, 3H);  $^{13}C$  NMR ( $CDCl_3$ , 100 MHz):  $\delta$  200.3, 140.8, 138.9, 136.7, 134.1, 133.5, 131.1, 129.3, 128.3, 128.2, 127.9, 126.8, 126.6, 126.1, 125.7, 125.3, 125.1, 31.6, 8.0; HRMS-EI ( $m/z$ ) [ $M^+$ ] calcd for  $C_{19}H_{16}O$ : 260.1201, found: 260.1205.

**4-(naphthalen-1-yl)aniline (5ob)**<sup>12</sup> (table 2, entry 31)

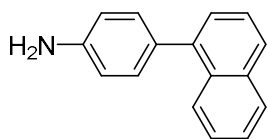

This compound was prepared from 4-bromoaniline **3o** and 1-naphthylboronic acid **4b** in 99% yield (0.217 g). Dark-red oil;  $^1H$  NMR ( $CDCl_3$ , 400 MHz):  $\delta$  7.97 (d,  $J = 8.4$  Hz, 1H), 7.88 (d,  $J = 7.6$  Hz, 1H), 7.81 (d,  $J = 8.4$  Hz, 1H), 7.52–7.39 (m, 4H), 7.30 (d,  $J = 8.4$  Hz, 2H), 6.82 (d,  $J = 8.8$ , 2H), 3.74 (br, 2H);  $^{13}C$  NMR ( $CDCl_3$ , 100 MHz):  $\delta$  145.6, 140.3, 133.8, 131.8, 130.9, 130.8, 128.2, 126.9, 126.7, 126.1, 125.7, 125.6, 125.4, 114.8.

### 1.2.5. Pd-catalyzed the Mizoroki–Heck coupling reaction

Olefin **6** (1.50 mmol), aryl halide **3** (1.00 mmol), CsF (2.00 mmol), bis-NHC **1c** (1.0 mol%) and  $Pd(dba)_2$  (1.0 mol%) were charged to the Schlenk tube. Further dry DMF (5.0 mL) was added. The mixture was stirred at 60 °C for 24 h. After completion of the reaction, monitored by TLC, the reaction was quenched by water (5.0 mL). The aqueous layer was extracted with EtOAc (5.0 mL $\times$ 3). The combined organic layers were dried over anhydrous  $MgSO_4$  and then filtered. The solvent was evaporated under reduced pressure and the corresponding crude product of the Heck–Mizoroki coupling reaction was purified by chromatography.

**methyl (*E*)-3-(4-acetylphenyl)acrylate (7da)**<sup>13</sup> (table 4, entry 1)

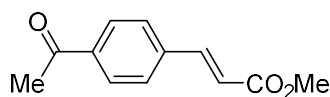

This compound was prepared from 4-bromoacetophenone **3d** and methyl acrylate **6a** in 44% yield (0.0892 g).  $^1\text{H}$  NMR ( $\text{CDCl}_3$ , 400 MHz):  $\delta$  7.94 (d,  $J$  = 8.4 Hz, 2H), 7.68 (d,  $J$  = 16.0 Hz, 1H), 7.58 (d,  $J$  = 8.4 Hz, 2H), 6.50 (d,  $J$  = 16.0 Hz, 1H), 3.80 (s, 3H);  $^{13}\text{C}$  NMR ( $\text{CDCl}_3$ , 100 MHz):  $\delta$  197.3, 166.9, 143.2, 138.6, 137.9, 128.8, 128.1, 120.2, 51.8, 26.6.

**(E)-1-(4-styrylphenyl)propan-1-one (7eb)** (table 4, entry 2)

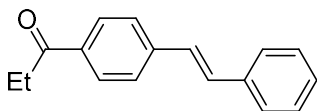

This compound was prepared from 1-(4-bromophenyl)propan-1-one **3e** and styrene **6b** in 93% yield (0.220 g).  $^1\text{H}$  NMR ( $\text{CDCl}_3$ , 400 MHz):  $\delta$  7.97 (d,  $J$  = 8.4 Hz, 2H), 7.59 (d,  $J$  = 8.4 Hz, 2H), 7.54 (d,  $J$  = 7.2 Hz, 2H), 7.40–7.28 (m, 3H), 7.23 (d,  $J$  = 16.4 Hz, 1H), 7.13 (d,  $J$  = 16.4 Hz, 1H), 3.01 (q,  $J$  = 7.2 Hz, 2H), 1.24 (t,  $J$  = 7.2 Hz, 3H);  $^{13}\text{C}$  NMR ( $\text{CDCl}_3$ , 100 MHz):  $\delta$  199.9, 141.5, 136.5, 135.5, 131.0, 128.6, 128.3, 128.1, 127.3, 126.6, 126.3, 31.5, 8.1.

**(E)-4-styrylbenzaldehyde (7gb)**<sup>14</sup> (table 4, entry 3)

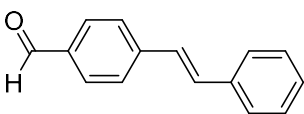

This compound was prepared from methyl 4-bromobenzaldehyde **3g** and styrene **6b** in 98% yield (0.154 g).  $^1\text{H}$  NMR ( $\text{CDCl}_3$ , 400 MHz):  $\delta$  10.00 (s, 1H), 7.88 (d,  $J$  = 7.6 Hz, 2H), 7.66 (d,  $J$  = 7.6 Hz, 2H), 7.55 (d,  $J$  = 8.0 Hz, 2H), 7.38 (d,  $J$  = 7.6 Hz, 2H), 7.32 (d,  $J$  = 7.6 Hz, 1H), 7.27 (d,  $J$  = 16.4 Hz, 1H), 7.15 (d,  $J$  = 16.4 Hz, 1H);  $^{13}\text{C}$  NMR ( $\text{CDCl}_3$ , 100 MHz):  $\delta$  191.5, 143.2, 136.4, 135.1, 132.0, 130.1, 128.7, 128.4, 127.1, 126.8, 126.7.

**(E)-4-(3-nitrostyryl)benzaldehyde (7gc)** (table 4, entry 4)

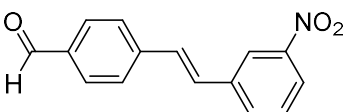

This compound was prepared from 4-bromobenzaldehyde **3g** and 3-nitrostyrene **6c** in 96% yield (0.243 g).  $^1\text{H}$  NMR ( $\text{CDCl}_3$ , 400 MHz):  $\delta$  10.03 (s, 1H), 8.42 (t,  $J$  = 2.0 Hz, 1H), 8.17–8.15 (m, 1H), 7.92 (d,  $J$  = 8.0 Hz, 2H), 7.90–7.83 (m, 1H), 7.70 (d,  $J$  = 8.0 Hz, 2H), 7.57 (t,  $J$  = 8.0 Hz, 1H), 7.29 (s, 2H);  $^{13}\text{C}$  NMR ( $\text{CDCl}_3$ , 100 MHz):  $\delta$  191.5, 148.7, 142.1, 138.3, 135.9, 132.6, 130.3, 130.2, 129.7, 129.3, 127.2, 122.7, 121.2.

**methyl (E)-3-(4-formylphenyl)acrylate (7ga)**<sup>15</sup> (table 4, entry 5)

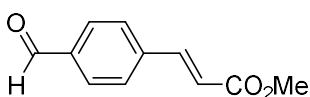

This compound was prepared from 4-bromobenzaldehyde **3g** and methyl acrylate **6a** in 98% yield (0.186 g).  $^1\text{H}$  NMR ( $\text{CDCl}_3$ , 400 MHz):

$\delta$  9.95 (s, 1H), 7.82 (d,  $J$  = 8.0 Hz, 2H), 7.65–7.58 (m, 3H), 6.47 (d,  $J$  = 16.0 Hz, 1H), 3.75 (s, 3H);

$^{13}\text{C}$  NMR ( $\text{CDCl}_3$ , 100 MHz):  $\delta$  191.3, 166.5, 142.9, 139.7, 136.9, 129.9, 128.3, 120.7, 51.7.

**(*E*)-4-(2-(naphthalen-2-yl)vinyl)benzaldehyde (7gd)**<sup>16</sup> (table 4, entry 6)

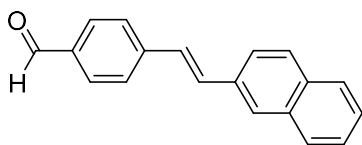

This compound was prepared from 4-bromobenzaldehyde **3g** and 2-vinylnaphthalene **6d** in 61% yield (0.156 g).  $^1\text{H}$  NMR ( $\text{CDCl}_3$ , 400 MHz):  $\delta$  10.01 (s, 1H), 7.91–7.82 (m, 6H), 7.77–7.70 (m, 3H), 7.55

(d,  $J$  = 8.0 Hz, 2H), 7.44 (d,  $J$  = 16.4 Hz, 1H), 7.27 (d,  $J$  = 16.4 Hz, 1H);  $^{13}\text{C}$  NMR ( $\text{CDCl}_3$ , 100 MHz):  $\delta$  191.6, 143.4, 135.3, 134.0, 133.6, 133.4, 132.2, 130.2, 129.0, 128.1, 127.7, 127.6, 127.5, 126.9, 126.5, 126.4, 123.3.

**(*E*)-4-(4-methoxystyryl)benzaldehyde (7ge)**<sup>17</sup> (table 4, entry 7)

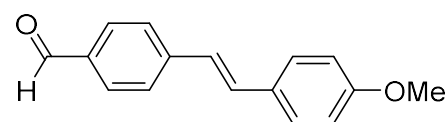

This compound was prepared from 4-bromobenzaldehyde **3g** and 1-methoxy-4-vinylbenzene **6e** in 67% yield (0.161 g).  $^1\text{H}$  NMR ( $\text{CDCl}_3$ , 400 MHz):  $\delta$  9.98 (s, 1H), 7.86 (d,  $J$  = 8.4 Hz,

2H), 7.63 (d,  $J$  = 8.4 Hz, 2H), 7.50 (d,  $J$  = 8.8 Hz, 2H), 7.23 (d,  $J$  = 16.4 Hz, 1H), 7.01 (d,  $J$  = 16.4 Hz, 1H), 6.93 (d,  $J$  = 8.8 Hz, 2H), 3.85 (s, 3H);  $^{13}\text{C}$  NMR ( $\text{CDCl}_3$ , 100 MHz):  $\delta$  191.6, 159.9, 143.8, 134.9, 131.7, 130.2, 129.3, 128.2, 126.5, 125.1, 114.2, 55.3.

**ethyl (*E*)-4-(4-methoxystyryl)benzoate (7se)**<sup>18</sup> (table 4, entry 8)

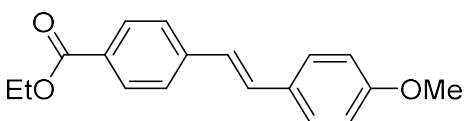

This compound was prepared from ethyl 4-bromobenzoate **3s** and 1-methoxy-4-vinylbenzene **6e** in 66% yield (0.185 g).  $^1\text{H}$  NMR ( $\text{CDCl}_3$ , 400 MHz):  $\delta$  8.01 (d,  $J$  = 8.0 Hz, 2H),

7.54 (d,  $J$  = 7.2 Hz, 2H), 7.48 (d,  $J$  = 7.6 Hz, 2H), 7.17 (d,  $J$  = 16.0 Hz, 1H), 6.99 (d,  $J$  = 16.0 Hz, 1H), 6.91 (d,  $J$  = 7.6 Hz, 2H), 4.38 (q,  $J$  = 8.4 Hz, 2H), 3.84 (s, 3H), 1.40 (t,  $J$  = 8.4 Hz, 3H);  $^{13}\text{C}$  NMR ( $\text{CDCl}_3$ , 100 MHz):  $\delta$  166.4, 159.7, 142.0, 130.6, 129.9, 129.5, 128.7, 128.0, 125.9, 125.4, 114.2, 60.8, 55.3, 14.3.

**methyl cinnamate (7ta)**<sup>13</sup> (table 4, entry 9)

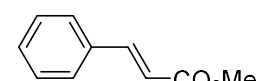

This compound was prepared from iodobenzene **3t'** and methyl acrylate **6a** in 96% yield (0.155 g).  $^1\text{H}$  NMR ( $\text{CDCl}_3$ , 400 MHz):  $\delta$  7.71 (d,  $J$  = 16.0 Hz,

1H), 7.50–7.48 (m, 2H), 7.36–7.33 (m, 3H), 6.46 (d,  $J$  = 16.0 Hz, 1H), 3.79 (s, 3H);  $^{13}\text{C}$  NMR ( $\text{CDCl}_3$ , 100 MHz):  $\delta$  166.9, 144.4, 134.0, 129.9, 128.5, 127.7, 117.4, 51.2.

**methyl (*E*)-3-(4-methoxyphenyl)acrylate (7aa)**<sup>19</sup> (table 4, entry 10)

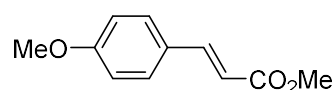

This compound was prepared from 4-iodoanisole **3a'** and methyl acrylate **6a** in 98% yield (0.189 g). <sup>1</sup>H NMR (CDCl<sub>3</sub>, 400 MHz): δ 7.61 (d, *J* = 16.0 Hz, 1H), 7.41 (s, br, 2H), 6.84 (s, br, 2H), 6.27 (d, *J* = 16.0 Hz, 1H), 3.75 (s, 6H); <sup>13</sup>C NMR (CDCl<sub>3</sub>, 100 MHz): δ 167.2, 161.0, 144.0, 129.3, 126.6, 114.8, 113.9, 54.8, 51.0.

**cinnamitrile (7tf)**<sup>20</sup> (table 4, entry 11)

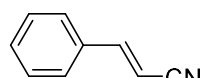

This compound was prepared from iodobenzene **3t'** and acrylonitrile **6f** in 78% yield (0.101 g). <sup>1</sup>H NMR (CDCl<sub>3</sub>, 400 MHz): δ 7.44–7.40 (m, 5H), 7.37 (d, *J* = 16.4 Hz, 1H), 5.86 (d, *J* = 16.4 Hz, 1H); <sup>13</sup>C NMR (CDCl<sub>3</sub>, 100 MHz): δ 150.4, 133.3, 131.0, 128.9, 127.2, 118.0, 96.1.

**(*E*)-3-(4-methoxyphenyl)acrylonitrile (7af)**<sup>19</sup> (table 4, entry 12)

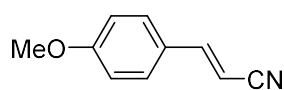

This compound was prepared from 4-iodoanisole **3a'** and acrylonitrile **6f** in 71% yield (0.112 g). <sup>1</sup>H NMR (CDCl<sub>3</sub>, 400 MHz): δ 7.36 (d, *J* = 7.6 Hz, 2H), 7.28 (d, *J* = 16.4 Hz, 1H), 6.90 (d, *J* = 7.6 Hz, 2H), 5.68 (d, *J* = 16.4 Hz, 1H), 3.83 (s, 3H); <sup>13</sup>C NMR (CDCl<sub>3</sub>, 100 MHz): δ 161.7, 149.7, 128.8, 126.0, 118.5, 114.2, 92.9, 55.2.

**(*E*)-stilbene (7tb)**<sup>13</sup> (table 4, entry 13)

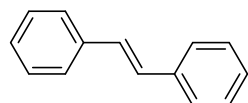

This compound was prepared from iodobenzene **3t'** and styrene **6b** in 72% yield (0.130 g). <sup>1</sup>H NMR (CDCl<sub>3</sub>, 400 MHz): δ 7.46–7.44 (m, 4H), 7.31–7.29 (m, 4H), 7.22–7.19 (m, 2H), 7.05–7.04 (m, 2H); <sup>13</sup>C NMR (CDCl<sub>3</sub>, 100 MHz): δ 137.2, 128.6, 127.5, 126.4.

### 1.2.6. Pd-catalyzed the Friedel–Crafts alkylation reaction

Indole **9** (1.50 mmol), nitroalkene **8** (0.500 mmol), **1c**–Ag (0.50 mol%), and Pd(OAc)<sub>2</sub> (1.0 mol%) were charged to the Schlenk tube. Isopropanol (HPLC grade, 3.0 mL) was added. The mixture was stirred at 30 °C for 24 h. After completion of the reaction, monitored by TLC, the reaction was quenched by water (3.0 mL). The aqueous layer was extracted with EtOAc (3.0 mL×3). The combined organic layers were dried over anhydrous MgSO<sub>4</sub> and then filtered. The solvent was evaporated under reduced pressure and the corresponding crude product of the Friedel–Crafts alkylation reaction was purified by chromatography.

### 3-(2-nitro-1-phenylethyl)-1*H*-indole (10aa)<sup>21</sup> (table 6, entry 1)

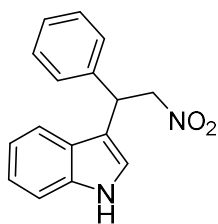

This compound was prepared from nitrostyrene **8a** and indole **9a** in 96% yield (0.128 g). Brown solid; Mp = 108–110 °C; <sup>1</sup>H NMR (CDCl<sub>3</sub>, 400 MHz): δ 8.05 (s, 1H), 7.43 (d, *J* = 8.0 Hz, 1H), 7.34–7.23 (m, 6H), 7.19 (t, *J* = 8.0 Hz, 1H), 7.07 (t, *J* = 8.0 Hz, 1H), 6.99 (s, 1H), 5.17 (t, *J* = 8.0 Hz, 1H), 5.05 (dd, *J* = 12.4, 8.0 Hz, 1H), 4.92 (dd, *J* = 12.4, 8.0 Hz, 1H); <sup>13</sup>C NMR (CDCl<sub>3</sub>, 100 MHz): δ 139.1, 136.4, 128.9, 127.7, 127.5, 126.0, 122.6, 121.6, 119.8, 118.8, 114.2, 111.4, 79.4, 41.5.

### 3-(1-(2-methylphenyl)-2-nitroethyl)-1*H*-indole (10ba)<sup>22</sup> (table 6, entry 2)

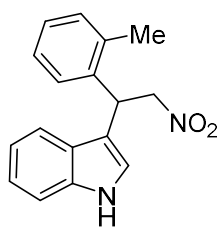

This compound was prepared from (*E*)-1-methyl-2-(2-nitrovinyl)benzene **8b** and indole **9a** in 86% yield (0.121 g). Green oil; <sup>1</sup>H NMR (CDCl<sub>3</sub>, 400 MHz): δ 8.01 (s, 1H), 7.46 (d, *J* = 8.0 Hz, 1H), 7.30 (d, *J* = 8.0 Hz, 1H), 7.24–7.14 (m, 5H), 7.08 (t, *J* = 8.0 Hz, 1H), 6.83 (s, 1H), 5.41 (t, *J* = 8.0 Hz, 1H), 4.99 (dd, *J* = 12.8, 8.0 Hz, 1H), 4.87 (dd, *J* = 12.8, 8.0 Hz, 1H), 2.41 (s, 3H); <sup>13</sup>C NMR (CDCl<sub>3</sub>, 100 MHz): δ 137.1, 136.3, 136.1, 131.0, 127.2, 126.3, 126.1, 125.9, 122.5, 122.4, 119.7, 118.4, 113.7, 111.4, 78.4, 37.1, 19.3.

### 3-(1-(3-methylphenyl)-2-nitroethyl)-1*H*-indole (10ca)<sup>23</sup> (table 6, entry 3)

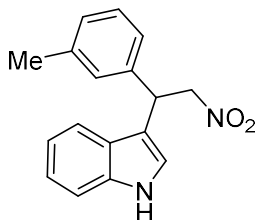

This compound was prepared from (*E*)-1-methyl-3-(2-nitrovinyl)benzene **8c** and indole **9a** in 70% yield (0.0988 g). Brown oil; <sup>1</sup>H NMR (CDCl<sub>3</sub>, 400 MHz): δ 8.10 (s, 1H), 7.47 (d, *J* = 8.0 Hz, 1H), 7.36 (d, *J* = 8.0 Hz, 1H), 7.23–7.03 (m, 7H), 5.15 (t, *J* = 8.0 Hz, 1H), 5.05 (dd, *J* = 12.4, 8.0 Hz, 1H), 4.93 (dd, *J* = 12.4, 8.0 Hz, 1H), 2.31 (s, 3H); <sup>13</sup>C NMR (CDCl<sub>3</sub>, 100 MHz): δ 139.0, 138.4, 136.2, 128.6, 128.4, 128.2, 125.9, 124.5, 122.3, 121.5, 119.6, 118.7, 113.9, 111.3, 79.4, 41.3, 21.2.

### 3-(1-(4-methylphenyl)-2-nitroethyl)-1*H*-indole (10da)<sup>24</sup> (table 6, entry 4)

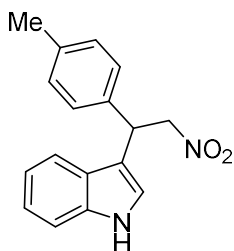

This compound was prepared from (*E*)-1-methyl-4-(2-nitrovinyl)benzene **8d** and indole **9a** in 81% yield (0.113 g). Brown oil; <sup>1</sup>H NMR (CDCl<sub>3</sub>, 400 MHz): δ 8.04 (s, 1H), 7.43 (d, *J* = 8.0 Hz, 1H), 7.31 (d, *J* = 8.0 Hz, 1H), 7.20 (d, *J* = 8.0 Hz, 2H), 7.16 (t, *J* = 8.0 Hz, 1H), 7.10 (d, *J* = 8.0 Hz, 2H), 7.06 (t, *J* = 8.0 Hz, 1H), 6.96 (s, 1H), 5.13 (t, *J* = 8.0 Hz, 1H), 5.02 (dd, *J* = 12.4, 8.0 Hz, 1H),

4.89 (dd,  $J = 12.4, 8.0$  Hz, 1H), 2.29 (s, 3H);  $^{13}\text{C}$  NMR ( $\text{CDCl}_3$ , 100 MHz):  $\delta$  137.1, 136.3, 136.0, 129.5, 127.5, 125.9, 122.4, 121.5, 119.7, 118.8, 114.2, 111.3, 79.5, 41.1, 20.9.

**3-(1-(2-chlorophenyl)-2-nitroethyl)-1H-indole (10ea)**<sup>24</sup> (table 6, entry 5)

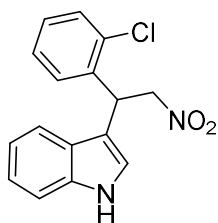

This compound was prepared from (*E*)-1-chloro-2-(2-nitrovinyl)benzene **8e** and indole **9a** in 80% yield (0.120 g). White solid; Mp = 108–110 °C;  $^1\text{H}$  NMR ( $\text{CDCl}_3$ , 400 MHz):  $\delta$  8.12 (s, 1H), 7.44 (d,  $J = 8.0$  Hz, 2H), 7.36 (d,  $J = 8.0$  Hz, 1H), 7.22–7.11 (m, 5H), 7.08 (t,  $J = 8.0$  Hz, 1H), 5.74 (t,  $J = 8.0$  Hz, 1H), 5.01 (dd,  $J = 12.4, 8.0$  Hz, 1H), 4.97 (dd,  $J = 12.4, 8.0$  Hz, 1H);  $^{13}\text{C}$  NMR ( $\text{CDCl}_3$ , 100 MHz):  $\delta$  136.4, 133.8, 130.1, 128.9, 128.8, 127.3, 126.1, 122.7, 121.9, 120.0, 118.9, 113.1, 111.4, 77.6, 37.9.

**3-(1-(3-chlorophenyl)-2-nitroethyl)-1H-indole (10fa)**<sup>24</sup> (table 6, entry 6)

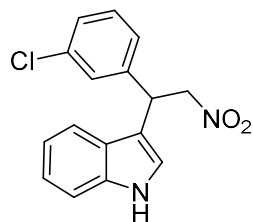

This compound was prepared from (*E*)-1-chloro-3-(2-nitrovinyl)benzene **8f** and indole **9a** in 71% yield (0.107 g). Yellow oil;  $^1\text{H}$  NMR ( $\text{CDCl}_3$ , 400 MHz):  $\delta$  8.14 (s, 1H), 7.42 (d,  $J = 8.0$  Hz, 1H), 7.36 (d,  $J = 8.0$  Hz, 1H), 7.30 (s, 1H), 7.25–7.19 (m, 4H), 7.09 (t,  $J = 7.6$  Hz, 1H), 7.02 (s, 1H), 5.16 (t,  $J = 8.0$  Hz, 1H), 5.04 (dd,  $J = 12.4, 8.0$  Hz, 1H), 4.93 (dd,  $J = 12.4, 8.0$  Hz, 1H);  $^{13}\text{C}$  NMR ( $\text{CDCl}_3$ , 100 MHz):  $\delta$  141.3, 136.4, 134.6, 130.1, 127.9, 127.8, 126.0, 125.8, 122.7, 121.6, 119.9, 118.6, 113.3, 111.5, 79.1, 41.1.

**3-(1-(4-chlorophenyl)-2-nitroethyl)-1H-indole (10ga)**<sup>21</sup> (table 6, entry 7)

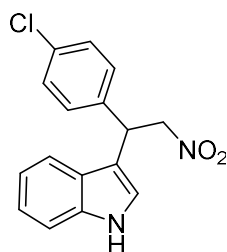

This compound was prepared from (*E*)-1-chloro-4-(2-nitrovinyl)benzene **8g** and indole **9a** in 70% yield (0.105 g). Yellow oil;  $^1\text{H}$  NMR ( $\text{CDCl}_3$ , 400 MHz):  $\delta$  8.12 (s, 1H), 7.40 (d,  $J = 8.0$  Hz, 1H), 7.36 (d,  $J = 8.0$  Hz, 1H), 7.30–7.25 (m, 4H), 7.21 (t,  $J = 8.0$  Hz, 1H), 7.08 (t,  $J = 8.0$  Hz, 1H), 7.01 (s, 1H), 5.16 (t,  $J = 8.0$  Hz, 1H), 5.05 (dd,  $J = 12.4, 8.0$  Hz, 1H), 4.90 (dd,  $J = 12.4, 8.0$  Hz, 1H);  $^{13}\text{C}$  NMR ( $\text{CDCl}_3$ , 100 MHz):  $\delta$  137.6, 136.4, 133.3, 129.1, 129.0, 125.8, 122.7, 121.5, 119.9, 118.7, 113.6, 111.4, 79.2, 40.8.

**3-(2-nitro-1-(thiophen-2-yl)ethyl)-1H-indole (10ha)**<sup>25</sup> (table 6, entry 8)



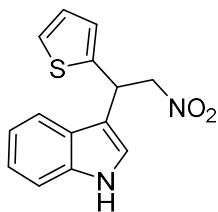

This compound was prepared from (*E*)-2-(2-nitroethyl)thiophene **8h** and indole **9a** in 87% yield (0.118 g). Brown solid; Mp = 108–110 °C; <sup>1</sup>H NMR (CDCl<sub>3</sub>, 400 MHz): δ 8.09 (s, 1H), 7.51 (d, *J* = 8.0 Hz, 1H), 7.36 (d, *J* = 8.0 Hz, 1H), 7.24–7.18 (m, 2H), 7.11 (t, *J* = 8.0 Hz, 1H), 7.09 (s, 1H), 6.98–6.92 (m, 2H), 5.45 (t, *J* = 8.0 Hz, 1H), 5.02 (dd, *J* = 12.4, 8.0 Hz, 1H), 4.98 (dd, *J* = 12.4, 8.0 Hz, 1H); <sup>13</sup>C NMR (CDCl<sub>3</sub>, 100 MHz): δ 142.9, 136.3, 126.9, 125.6, 125.1, 124.8, 122.6, 122.0, 119.9, 118.7, 113.7, 111.5, 79.9, 36.8.

### 3-(1-(naphthalen-1-yl)-2-nitroethyl)-1*H*-indole (**10ia**)<sup>24</sup> (table 6, entry 9)

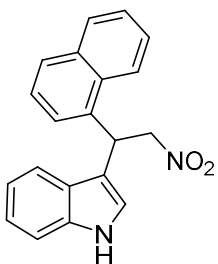

This compound was prepared from (*E*)-1-(2-nitrovinyl)naphthalene **8i** and indole **9a** in 90% yield (0.142 g). White solid; Mp = 108–110 °C; <sup>1</sup>H NMR (CDCl<sub>3</sub>, 400 MHz): δ 8.28 (d, *J* = 8.0 Hz, 1H), 8.08 (s, 1H), 7.89 (d, *J* = 7.6 Hz, 1H), 7.79 (t, *J* = 4.8 Hz, 1H), 7.56–7.52 (m, 2H), 7.44 (d, *J* = 8.0 Hz, 1H), 7.39–7.35 (m, 3H), 7.38 (t, *J* = 7.2 Hz, 1H), 7.06 (t, *J* = 8.0 Hz, 1H), 7.02 (d, *J* = 2.0 Hz, 1H), 6.08 (t, *J* = 8.0 Hz, 1H), 5.12–5.09 (m, 2H); <sup>13</sup>C NMR (CDCl<sub>3</sub>, 100 MHz): δ 136.4, 134.5, 134.0, 131.0, 129.1, 128.2, 126.8, 125.9, 125.8, 125.3, 124.3, 122.6, 122.5, 119.8, 118.6, 113.9, 111.4, 78.4, 36.8.

### 3-[1-(2-methylphenyl)-2-nitroethyl]-2-methyl-1*H*-indole (**10bb**) (table 6, entry 10)

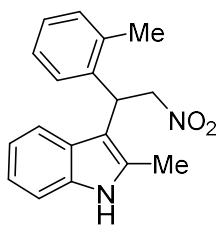

This compound was prepared from (*E*)-1-methyl-2-(2-nitrovinyl)benzene **8b** and 2-methylindole **9b** in 95% yield (0.140 g). Yellow solid; Mp = 110–112 °C; <sup>1</sup>H NMR (CDCl<sub>3</sub>, 400 MHz): δ 7.83 (s, 1H), 7.45 (d, *J* = 7.6 Hz, 1H), 7.43 (d, *J* = 8.0 Hz, 1H), 7.26–7.13 (m, 4H), 7.09 (t, *J* = 8.0 Hz, 1H), 7.01 (t, *J* = 8.0 Hz, 1H), 5.25 (t, *J* = 8.0 Hz, 1H), 5.16–5.07 (m, 2H), 2.30 (s, 3H), 2.25 (s, 3H); <sup>13</sup>C NMR (CDCl<sub>3</sub>, 100 MHz): δ 137.1, 136.7, 135.1, 132.8, 131.1, 127.1, 126.9, 125.9, 125.6, 121.0, 119.5, 118.1, 110.5, 107.2, 77.9, 37.7, 19.4, 11.8; HRMS-EI (*m/z*) [*M*]<sup>+</sup> calcd for C<sub>18</sub>H<sub>18</sub>N<sub>2</sub>O<sub>2</sub>: 294.1368, found: 294.1366; Anal. Calcd for C<sub>18</sub>H<sub>18</sub>N<sub>2</sub>O<sub>2</sub>: C, 73.45; H, 6.16; N, 9.52, found: C, 72.17; H, 6.18; N, 9.22.

### 3-[1-(2-chlorophenyl)-2-nitroethyl]-2-methyl-1*H*-indole (**10eb**)<sup>26</sup> (table 6, entry 11)

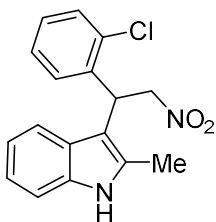

This compound was prepared from (*E*)-1-chloro-2-(2-nitrovinyl)benzene **8c** and 2-methylindole **9b** in 94% yield (0.148 g). Yellow solid; Mp = 110–112 °C; <sup>1</sup>H NMR (CDCl<sub>3</sub>, 400 MHz): δ 7.89 (s, 1H), 7.53 (d, *J* = 7.6 Hz, 1H), 7.49 (d, *J* = 8.0 Hz, 1H), 7.38 (dd, *J* = 7.6, 1.6 Hz, 1H), 7.27–7.19 (m, 3H), 7.11 (t, *J* = 8.0 Hz, 1H), 7.05 (t, *J* = 7.6 Hz, 1H), 5.50 (t, *J* = 8.0 Hz, 1H), 5.15–5.13 (m, 2H), 2.42 (s, 3H); <sup>13</sup>C NMR (CDCl<sub>3</sub>, 100 MHz): δ 136.4, 135.2, 133.8, 133.6, 130.2, 128.5, 128.4, 127.0, 126.9, 121.1, 119.6, 118.3, 110.8, 106.6, 77.1, 38.3, 12.0.

**3-(1-(4-methoxyphenyl)-2-nitroethyl)-2-methyl-1H-indole (10jb)**<sup>27</sup> (table 6, entry 12)

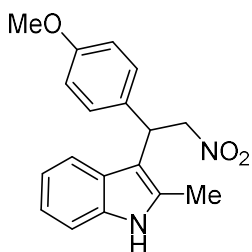

This compound was prepared from (*E*)-1-methoxy-4-(2-nitrovinyl)benzene **8j** and 2-methylindole **9b** in 89% yield (0.138 g). Yellow solid; Mp = 110–112 °C; <sup>1</sup>H NMR (CDCl<sub>3</sub>, 400 MHz): δ 7.85 (s, 1H), 7.36 (d, *J* = 8.0 Hz, 1H), 7.24–7.21 (m, 3H), 7.10 (t, *J* = 8.0 Hz, 1H), 7.02 (t, *J* = 8.0 Hz, 1H), 6.81 (d, *J* = 8.8 Hz, 2H), 5.20–5.04 (m, 3H), 3.75 (s, 3H), 2.38 (s, 3H); <sup>13</sup>C NMR (CDCl<sub>3</sub>, 100 MHz): δ 158.4, 135.3, 132.7, 131.4, 128.3, 126.7, 121.1, 119.6, 118.5, 114.0, 110.7, 108.8, 78.8, 55.1, 39.7, 11.8.

**3-(2-naphthalen-1-yl-2-nitroethyl)-2-methyl-1H-indole (10kb)** (table 6, entry 13)

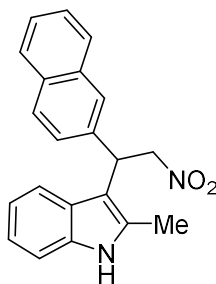

This compound was prepared from (*E*)-2-(2-nitrovinyl)naphthalene **8k** and 2-methylindole **9b** in 98% yield (0.161 g). White solid; Mp = 143–146 °C; <sup>1</sup>H NMR (CDCl<sub>3</sub>, 400 MHz): δ 7.89 (s, 1H), 7.79–7.73 (m, 4H), 7.48–7.44 (m, 2H), 7.38 (d, *J* = 8.0 Hz, 2H), 7.27 (d, *J* = 8.0 Hz, 1H), 7.10 (t, *J* = 7.6 Hz, 1H), 7.00 (t, *J* = 7.6 Hz, 1H), 5.40–5.22 (m, 2H), 5.20–5.17 (m, 1H), 2.42 (s, 3H); <sup>13</sup>C NMR (CDCl<sub>3</sub>, 100 MHz): δ 136.9, 135.3, 133.2, 133.0, 132.3, 128.6, 127.8, 127.5, 126.8, 126.3, 126.1, 126.0, 124.9, 121.3, 119.7, 118.4, 110.7, 108.6, 78.4, 40.4, 11.9; HRMS-EI (*m/z*) [*M*]<sup>+</sup> calcd for C<sub>21</sub>H<sub>18</sub>N<sub>2</sub>O<sub>2</sub>: 330.1368, found: 330.1369; Anal. Calcd for C<sub>21</sub>H<sub>18</sub>N<sub>2</sub>O<sub>2</sub>: C, 76.34; H, 5.49; N, 8.48, found: C, 75.86; H, 5.55; N, 8.51.

**2-methyl-3-(2-nitro-1-(thiophen-2-yl)ethyl)-1H-indole (10hb)**<sup>27</sup> (table 6, entry 14)

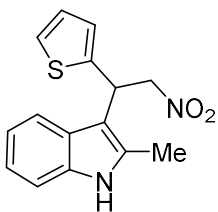

This compound was prepared from (*E*)-2-(2-nitroethyl)thiophene **8h** and 2-methylindole **9b** in 92% yield (0.132 g). Yellow oil;  $^1\text{H}$  NMR ( $\text{CDCl}_3$ , 400 MHz):  $\delta$  7.88 (s, 1H), 7.35 (d,  $J$  = 8.0 Hz, 1H), 7.26 (d,  $J$  = 8.0 Hz, 1H), 7.17 (d,  $J$  = 4.8 Hz, 1H), 7.11 (t,  $J$  = 7.6 Hz, 1H), 7.03 (t,  $J$  = 7.6 Hz, 1H), 6.93–6.90 (m, 2H), 5.35 (dd,  $J$  = 8.8, 6.8 Hz, 1H), 5.19 (dd,  $J$  = 12.4, 6.8 Hz, 1H), 5.08 (dd,  $J$  = 12.4, 8.8 Hz, 1H), 2.38 (s, 3H);  $^{13}\text{C}$  NMR ( $\text{CDCl}_3$ , 100 MHz):  $\delta$  143.2, 135.2, 133.1, 126.7, 126.2, 124.7, 124.3, 121.2, 119.5, 118.5, 110.7, 108.2, 78.8, 36.4, 11.6.

**2-methyl-3-(1-(1-methyl-1H-pyrrol-2-yl)-2-nitroethyl)-1H-indole (10lb)** (table 6, entry 15)

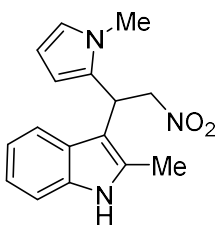

This compound was prepared from (*E*)-1-methyl-2-(2-nitroethyl)pyrrole **8n** and 2-methylindole **9b** in 91% yield (0.129 g). Yellow solid; Mp = 113–116 °C;  $^1\text{H}$  NMR ( $\text{CDCl}_3$ , 400 MHz):  $\delta$  7.82 (s, 1H), 7.37 (d,  $J$  = 8.0 Hz, 1H), 7.24 (d,  $J$  = 7.2 Hz, 1H), 7.10 (t,  $J$  = 7.2 Hz, 1H), 7.01 (t,  $J$  = 7.2 Hz, 1H), 6.54 (s, 1H), 6.18 (s, 1H), 6.10 (t,  $J$  = 3.2 Hz, 1H), 5.14–5.08 (m, 2H), 4.93 (dd,  $J$  = 14.4, 10.8 Hz, 1H), 3.28 (s, 3H), 2.29 (s, 3H);  $^{13}\text{C}$  NMR ( $\text{CDCl}_3$ , 100 MHz):  $\delta$  135.1, 132.6, 129.4, 126.7, 122.6, 121.3, 119.6, 117.9, 110.4, 106.7, 106.4, 105.6, 77.6, 33.6, 33.4, 11.3; HRMS-EI ( $m/z$ ) [ $\text{M}$ ] $^+$  calcd for  $\text{C}_{16}\text{H}_{17}\text{N}_3\text{O}_2$ : 283.1321, found: 283.1328; Anal. Calcd for  $\text{C}_{16}\text{H}_{17}\text{N}_3\text{O}_2$ : C, 67.83; H, 6.05; N, 14.83, found: C, 67.08; H, 6.03; N, 14.33.

**3-(1-nitro-4-phenylbut-3-en-2-yl)-2-methyl-1H-indole (10mb)** (table 6, entry 16)

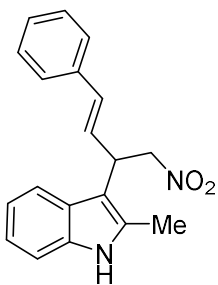

This compound was prepared from (*2E,4E*)-1-nitro-4-phenylbutadiene **8m** and 2-methylindole **9b** in 93% yield (0.142 g). Yellow solid; Mp = 115–117 °C;  $^1\text{H}$  NMR ( $\text{CDCl}_3$ , 400 MHz):  $\delta$  7.87 (s, 1H), 7.54 (d,  $J$  = 8.0 Hz, 1H), 7.32–7.18 (m, 5H), 7.15–7.06 (m, 2H), 6.51 (d,  $J$  = 2.8 Hz, 1H), 4.94 (dd,  $J$  = 12.0, 8.0 Hz, 1H), 4.81 (dd,  $J$  = 12.0, 8.0 Hz, 1H), 4.65 (t,  $J$  = 8.0 Hz, 1H), 2.44 (s, 3H);  $^{13}\text{C}$  NMR ( $\text{CDCl}_3$ , 100 MHz):  $\delta$  136.4, 135.3, 132.6, 131.9, 128.5, 127.6, 126.5, 126.4, 126.3, 121.2, 119.6, 118.3, 110.8, 107.3, 78.6, 38.9, 11.7; HRMS-EI ( $m/z$ ) [ $\text{M}$ ] $^+$  calcd for  $\text{C}_{19}\text{H}_{18}\text{N}_2\text{O}_2$ : 306.1368, found: 306.1367; Anal. Calcd for  $\text{C}_{19}\text{H}_{18}\text{N}_2\text{O}_2$ : C, 74.49; H, 5.92; N, 9.14, found: C, 74.34; H, 5.92; N, 9.06.

**2-methyl-3-(2-nitro-1-phenylethyl)-1H-indole (10ab)**<sup>27</sup> (table 6, entry 17)

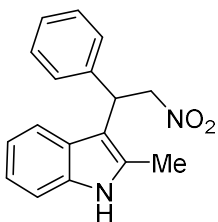

This compound was prepared from nitrostyrene **8a** and 2-methylindole **9b** in 84% yield (0.118 g). Yellow oil;  $^1\text{H}$  NMR ( $\text{CDCl}_3$ , 400 MHz):  $\delta$  7.86 (s, 1H), 7.36 (d,  $J$  = 8.0 Hz, 1H), 7.32–7.22 (m, 6H), 7.10 (t,  $J$  = 8.0 Hz, 1H), 7.02 (t,  $J$  = 8.0 Hz, 1H), 5.23–5.10 (m, 3H), 2.38 (s, 3H);  $^{13}\text{C}$  NMR ( $\text{CDCl}_3$ , 100 MHz):  $\delta$  139.4, 135.3, 132.9, 128.7, 127.2, 127.0, 126.7, 121.1, 119.5, 118.4, 110.7, 108.5, 78.5, 40.3, 11.7.

**N-methyl-3-(2-nitro-1-phenylethyl)-1H-indole (10ac)**<sup>21</sup> (table 6, entry 18)

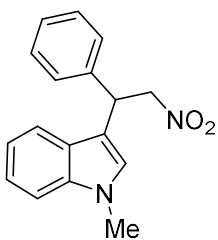

This compound was prepared from nitrostyrene **8a** and 1-methylindole **9c** at 80 °C for 24 h in 56% yield (0.0790 g). Brown oil;  $^1\text{H}$  NMR ( $\text{CDCl}_3$ , 400 MHz):  $\delta$  7.45 (d,  $J$  = 8.0 Hz, 1H), 7.36–7.26 (m, 6H), 7.23 (t,  $J$  = 8.0 Hz, 1H), 7.07 (t,  $J$  = 8.0 Hz, 1H), 6.87 (s, 1H), 5.17 (t,  $J$  = 8.0 Hz, 1H), 5.06 (dd,  $J$  = 12.4, 8.0 Hz, 1H), 4.94 (dd,  $J$  = 12.4, 8.0 Hz, 1H), 3.75 (s, 3H);  $^{13}\text{C}$  NMR ( $\text{CDCl}_3$ , 100 MHz):  $\delta$  139.3, 137.1, 128.8, 127.6, 127.4, 126.4, 126.3, 122.1, 119.3, 118.9, 112.6, 109.4, 79.4, 41.4, 32.7.

**6-fluoro-3-(2-nitro-1-phenylethyl)-1H-indole (10ad)**<sup>22</sup> (table 6, entry 19)

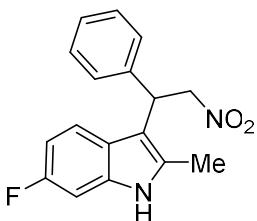

This compound was prepared from nitrostyrene **8a** and 6-fluoro-2-methylindole **9d** in 61% yield (0.0860 g). Brown oil;  $^1\text{H}$  NMR ( $\text{CDCl}_3$ , 400 MHz):  $\delta$  8.02 (s, 1H), 7.35–7.25 (m, 6H), 7.05–7.02 (m, 2H), 6.83 (t,  $J$  = 9.2 Hz, 1H), 5.15 (t,  $J$  = 8.0 Hz, 1H), 5.04 (dd,  $J$  = 12.4, 8.0 Hz, 1H), 4.92 (dd,  $J$  = 12.4, 8.0 Hz, 1H);  $^{13}\text{C}$  NMR ( $\text{CDCl}_3$ , 100 MHz):  $\delta$  138.9, 128.9, 127.6, 122.6, 121.7, 121.6, 119.7, 119.6, 114.3, 108.8, 108.5, 97.8, 97.5, 79.5, 41.1.

**5-chloro-2-methyl-3-(2-nitro-1-phenylethyl)-1H-indole (10ae)**<sup>28</sup> (table 6, entry 20)

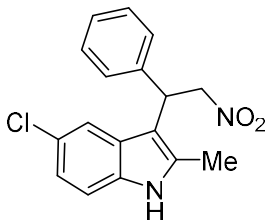

This compound was prepared from nitrostyrene **8a** and 5-chloro-2-methylindole **9e** in 90% yield (0.141 g). White solid; Mp = 115–117 °C;  $^1\text{H}$  NMR ( $\text{CDCl}_3$ , 400 MHz):  $\delta$  7.91 (s, 1H), 7.34–7.25 (m, 6H), 7.17 (d,  $J$  = 7.2 Hz, 1H), 7.05 (d,  $J$  = 7.2 Hz, 1H), 5.22–5.08 (m, 3H), 2.39 (s, 3H);  $^{13}\text{C}$

NMR ( $\text{CDCl}_3$ , 100 MHz):  $\delta$  138.8, 134.6, 133.6, 128.8, 127.7, 127.2, 127.1, 125.2, 121.4, 117.8, 111.6, 108.3, 78.3, 40.1, 11.8.

**2,5-dimethyl-3-(2-nitro-1-phenylethyl)-1H-indole (10af)** (table 6, entry 21)

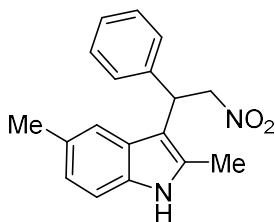

This compound was prepared from nitrostyrene **8a** and 2,5-dimethylindole **9f** in 92% yield (0.135 g). Yellow solid; Mp = 112–114 °C;  $^1\text{H}$  NMR ( $\text{CDCl}_3$ , 400 MHz):  $\delta$  7.26 (s, 1H), 7.33–7.27 (m, 4H), 7.25–7.22 (m, 1H), 7.16–7.14 (m, 2H), 6.93 (d,  $J$  = 7.6 Hz, 1H), 5.25–5.07 (m, 3H), 2.38 (s, 3H), 2.36 (s, 3H);  $^{13}\text{C}$  NMR ( $\text{CDCl}_3$ , 100 MHz):  $\delta$  139.5, 133.5, 132.9, 128.7, 128.6, 127.2, 126.9, 126.8, 122.6, 118.1, 110.3, 107.9, 78.5, 40.3, 21.5, 11.7; HRMS-EI ( $m/z$ ) [ $\text{M}$ ] $^+$  calcd for  $\text{C}_{18}\text{H}_{18}\text{N}_2\text{O}_2$ : 294.1368, found: 294.1358.; Anal. Calcd for  $\text{C}_{18}\text{H}_{18}\text{N}_2\text{O}_2$ : C, 73.45; H, 6.16; N, 9.52, found: C, 73.25; H, 6.21; N, 9.34.

## 2. References and notes:

- (1) Z. H. Zhang, T. S. Li, J. J. Li, *Monatsh. Chem.*, **2007**, *138*, 89.
- (2) X. Y. Yang, H. Xing, Y. Zhang, Y. S. Lai, Y. H. Zhang, Y. W. Jiang, D. W. Ma, *Chin. J. Chem.*, **2012**, *30*, 875.
- (3) S. Demir, I. Özdemir, B. Cetinkaya, *Appl. Organomet. Chem.*, **2006**, *20*, 254.
- (4) L. Seva, W. S. Hwang, S. Sabiah, *J. Mol. Catal. A: Chem.*, **2016**, *418*, 125.
- (5) Y.-R. Lin, C.-C. Chiu, H.-T. Chiu, D.-S. Lee, T.-J. Lu, *Appl. Organomet. Chem.*, **2018**, *32*, e3896.
- (6) S. Doherty, J. G. Knight, J. P. McGrady, A. M. Ferguson, N. A. B. Ward, R. W. Harrington, W. Clegg, *Adv. Synth. Catal.*, **2010**, *352*, 201.
- (7) M. E. Buden, J. F. Guastavino, R. A. Rossi, *Org. Lett.*, **2013**, *15*, 1174.
- (8) M. C. Fu, R. Shang, W. M. Cheng, Y. Fu, *Angew. Chem. Int. Ed.*, **2015**, *54*, 9042.
- (9) P. B. Zhang, J. Xu, Y. Z. Gao, X. Q. Li, G. Tang, Y. F. Zhao, *Synlett*, **2014**, *25*, 2928.
- (10) G. J. Chen, J. Huang, L. X. Gao, F. S. Han, *Chem. Eur. J.*, **2011**, *17*, 4038.
- (11) Q. Chen, Z. Q. Mao, F. Guo, X. S. Liu, *Tetrahedron Lett.*, **2016**, *57*, 3735.
- (12) T. Abe, T. Mino, K. Watanabe, F. Yagishita, M. Sakamoto, *Eur. J. Org. Chem.*, **2014**, *2014*, 3909.
- (13) J. Wang, Y. Zong, G. Yue, X. Wang, *RSC Adv.* **2015**, *3*, 76285.
- (14) P. A. Mane, S. Dey, K. V. Vivekananda, *Tetrahedron Lett.* **2017**, *58*, 25.
- (15) Y. Zong, J. Wang, P. An, G. Yue, X. Wang, *Appl. Organomet. Chem.* **2017**, *31*, e3762.
- (16) M. J. Bosiak, M. Rakowiecki, K. J. Orlowska, D. Kedziera, J. Adams, *Dyes and Pigments* **2013**, *99*, 803.
- (17) I. Katsuyama, P. V. Chouthaiwale, H. Akama, H.-L. Cui, F. Tamaka, *Tetrahedron Lett.* **2014**, *55*, 74.
- (18) B. H. Lipshutz, B. R. Taft, *Org. Lett.* **2008**, *10*, 1329.
- (19) D. Sharma, S. Kumar, A. K. Shil, N. R. Guha, P. Das, *Tetrahedron Lett.* **2012**, *53*, 7044.
- (20) P. J. Kropp, S. D. Crawford, *J. Org. Chem.* **1994**, *59*, 3102.
- (21) A. Mane, T. Lohar, R. Salunkhe, *Tetrahedron Lett.* **2016**, *57*, 2341.
- (22) M. Jeganathan, K. Kanagaraj, A. Dhakshinamoorthy, K. Pitchumani, *Tetrahedron Lett.* **2014**, *55*, 2061.
- (23) H. Jiang, J. Zhang, J. Xie, P. Liu, M. Xue, *Synth. Commun.* **2016**, *47*, 211.
- (24) J. Wu, X. Li, F. Wu, B. Wan, *Org. Lett.* **2011**, *13*, 4834.
- (25) R. S. Kusurkar, N. A. H. Alkobati, A. S. Gokule, P. M. Chaudhari, P. B. Waghchaure, *Synth. Commun.* **2006**, *36*, 1075.
- (26) Meshram, H. M.; Kumar, D. A.; Reddy, B. C. *Helv. Chim. Acta* **2009**, *92*, 1002.
- (27) X.-L. Liu, D. Xue, Z.-T. Zhang, *J. Heterocyclic Chem.* **2011**, *48*, 489.
- (28) M. De Rosa, A. Soriente, *Tetrahedron* **2010**, *66*, 2981.

$^1\text{H}$  NMR ( $\text{CDCl}_3$ , 400 MHz) spectrum of compound **2**

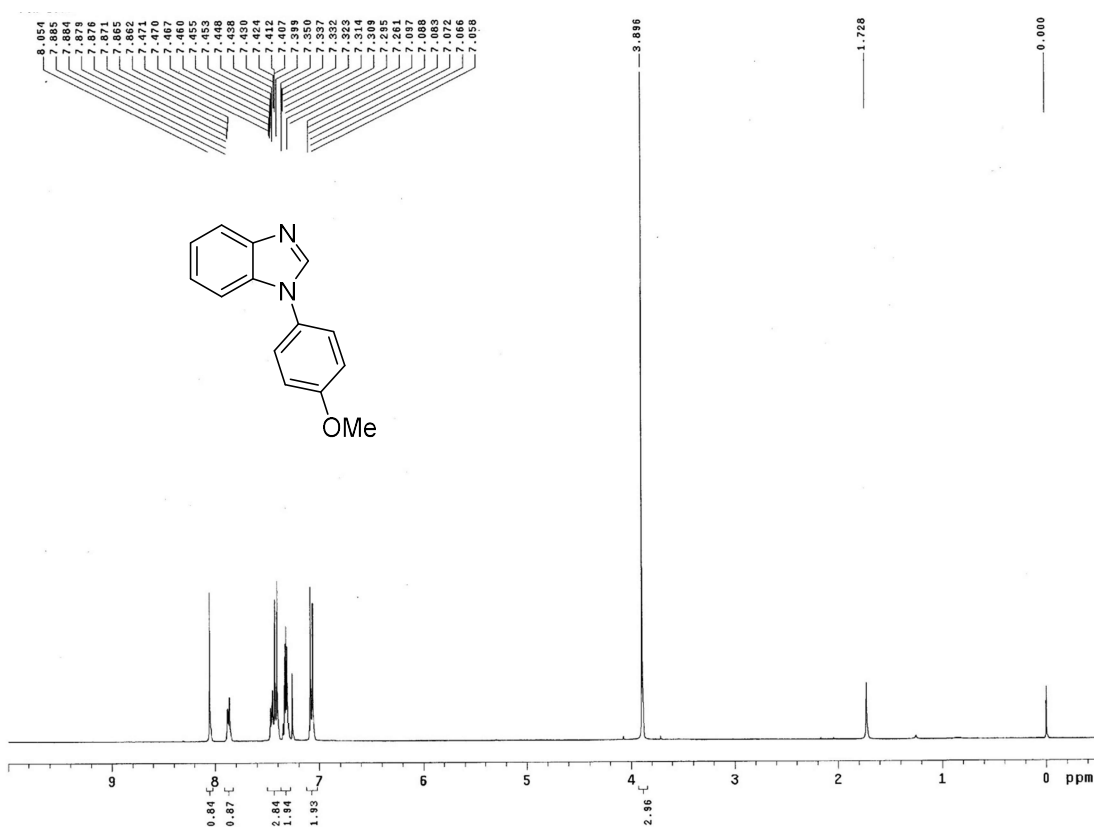

$^{13}\text{C}$  NMR ( $\text{CDCl}_3$ , 100 MHz) spectrum of compound **2**

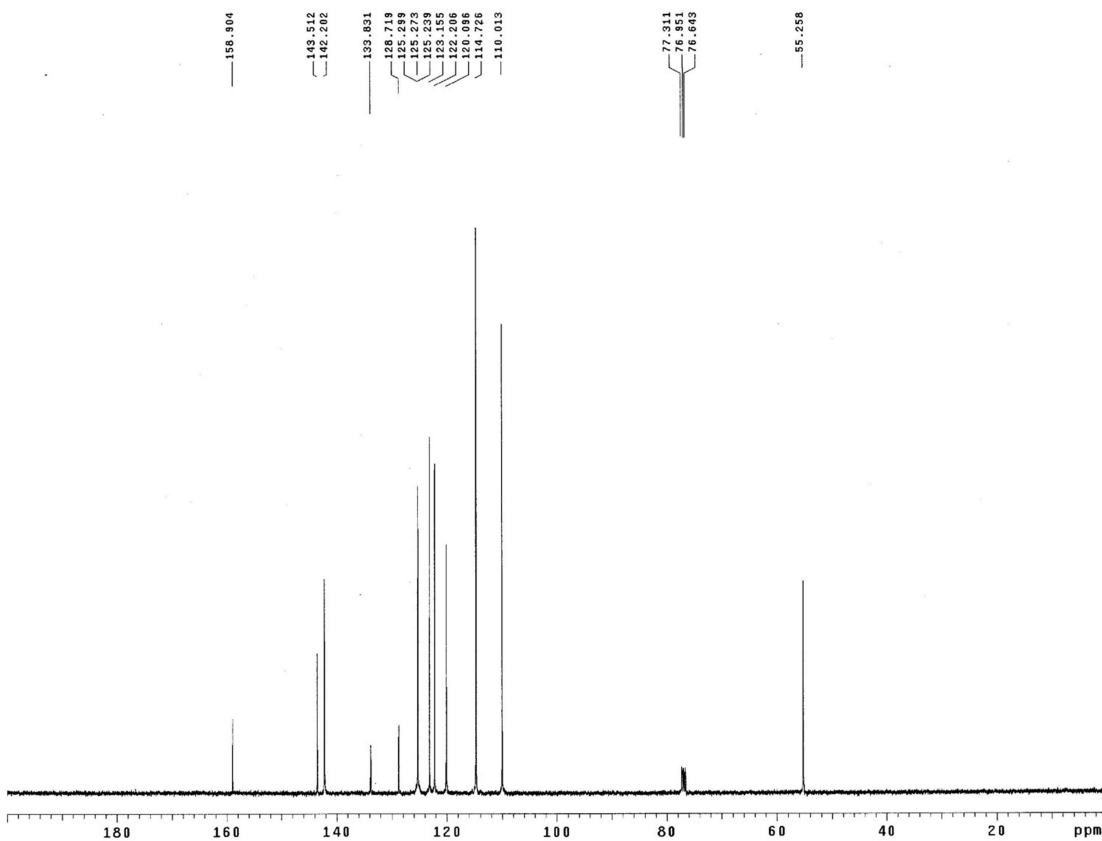

$^1\text{H}$  NMR ( $\text{CD}_3\text{OD}$ , 400 MHz) spectrum of compound **1a**

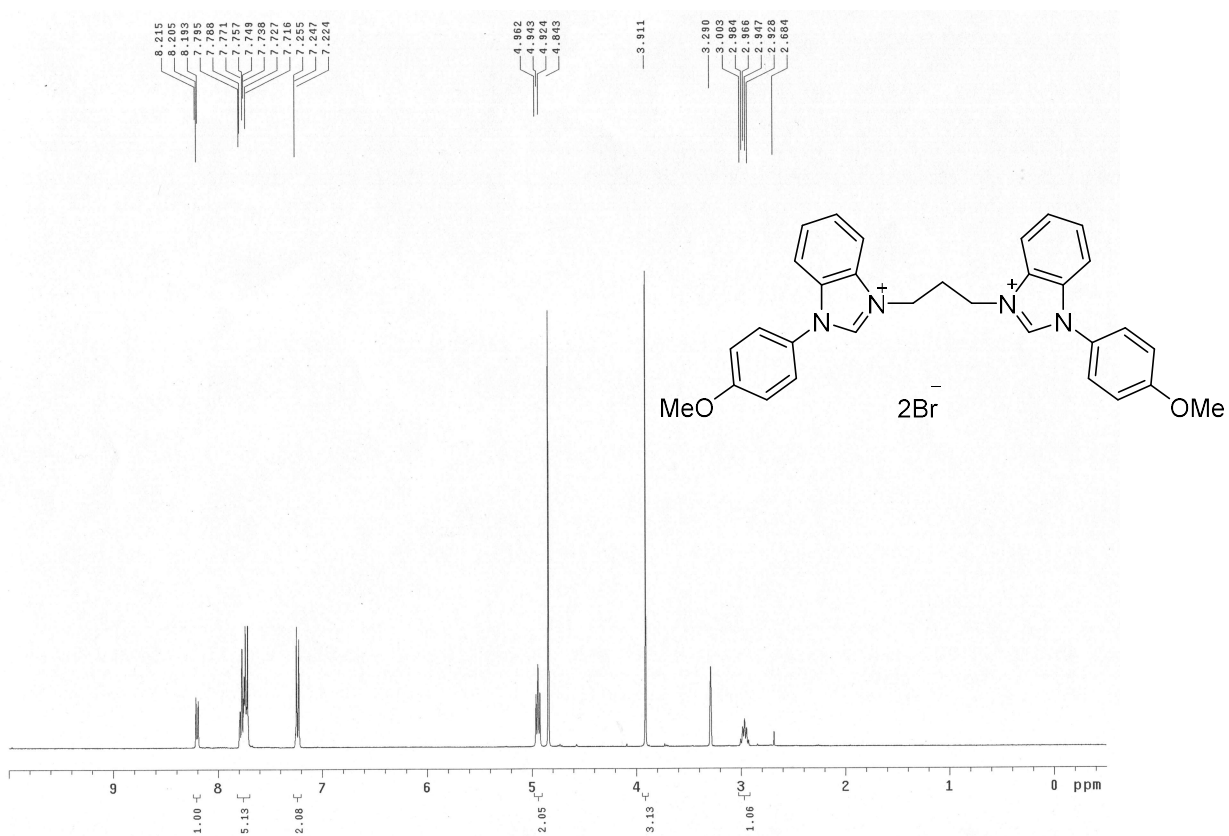

$^{13}\text{C}$  NMR ( $\text{CD}_3\text{OD}$ , 100 MHz) spectrum of compound **1a**

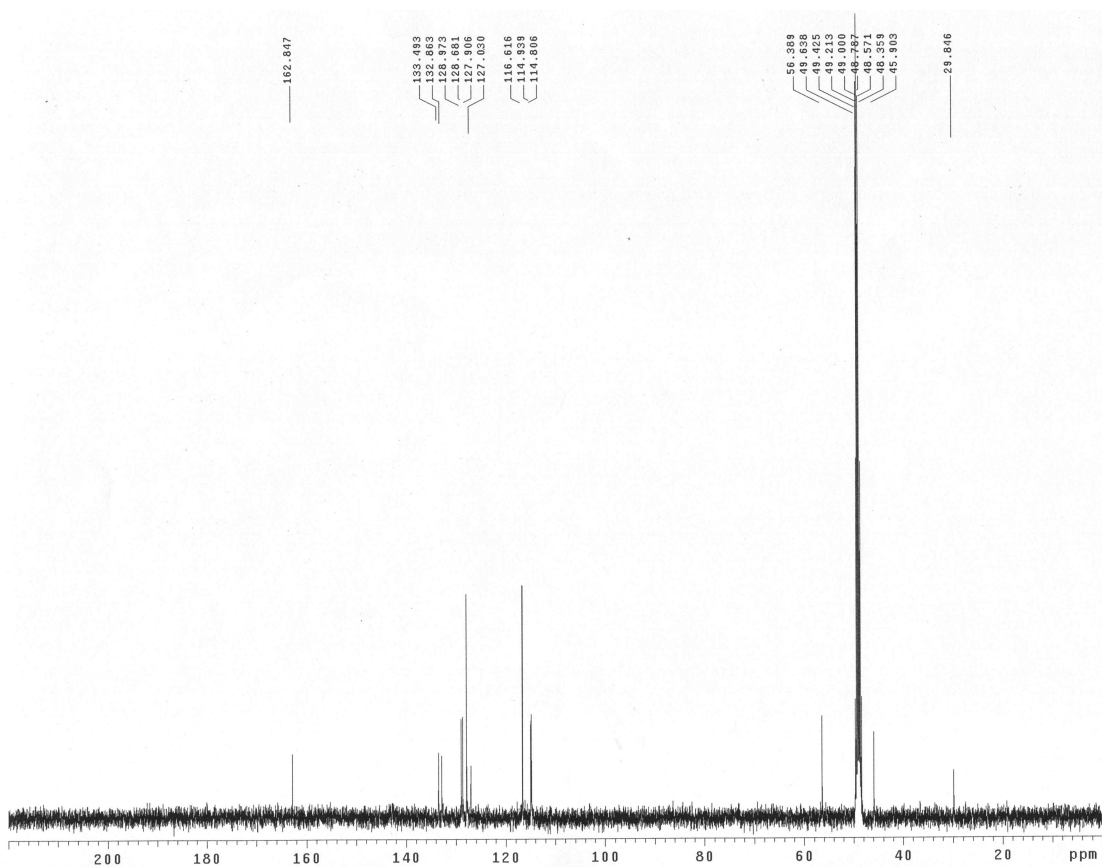



$^1\text{H}$  NMR ( $\text{CD}_3\text{OD}$ , 400 MHz) spectrum of compound **1b**

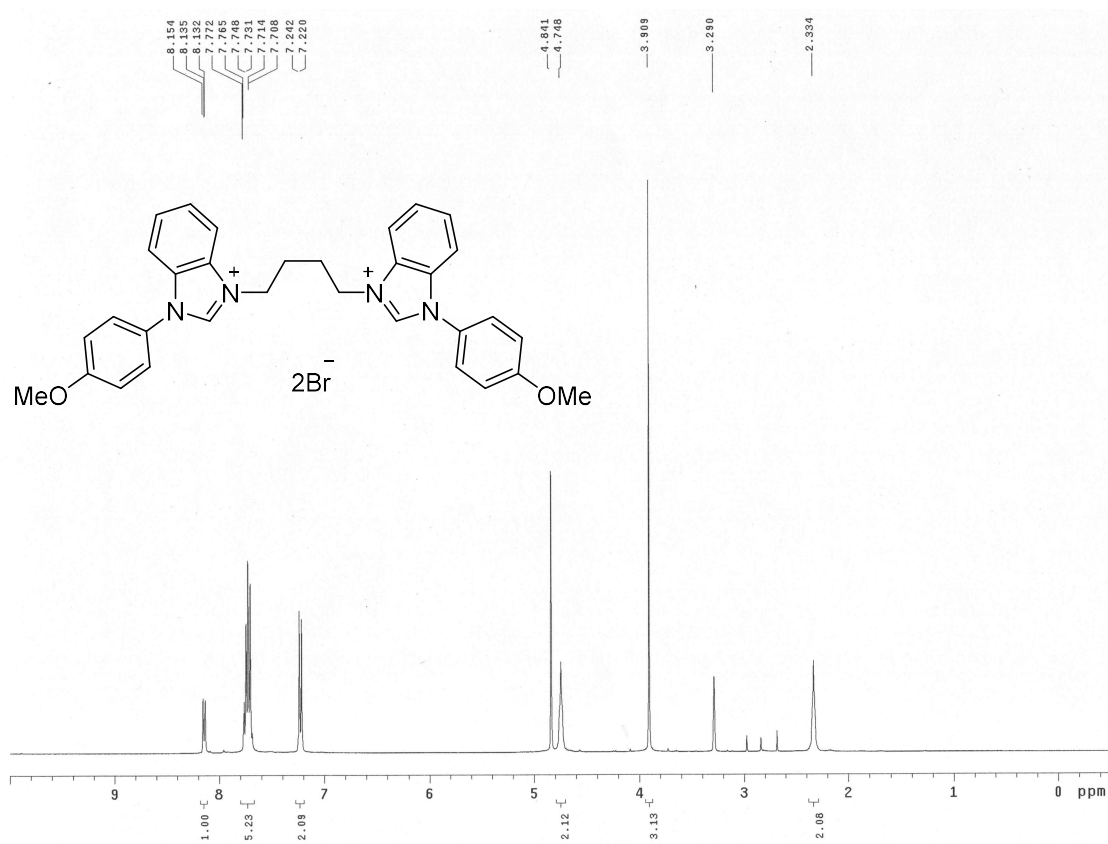

$^{13}\text{C}$  NMR ( $\text{CD}_3\text{OD}$ , 100 MHz) spectrum of compound **1b**

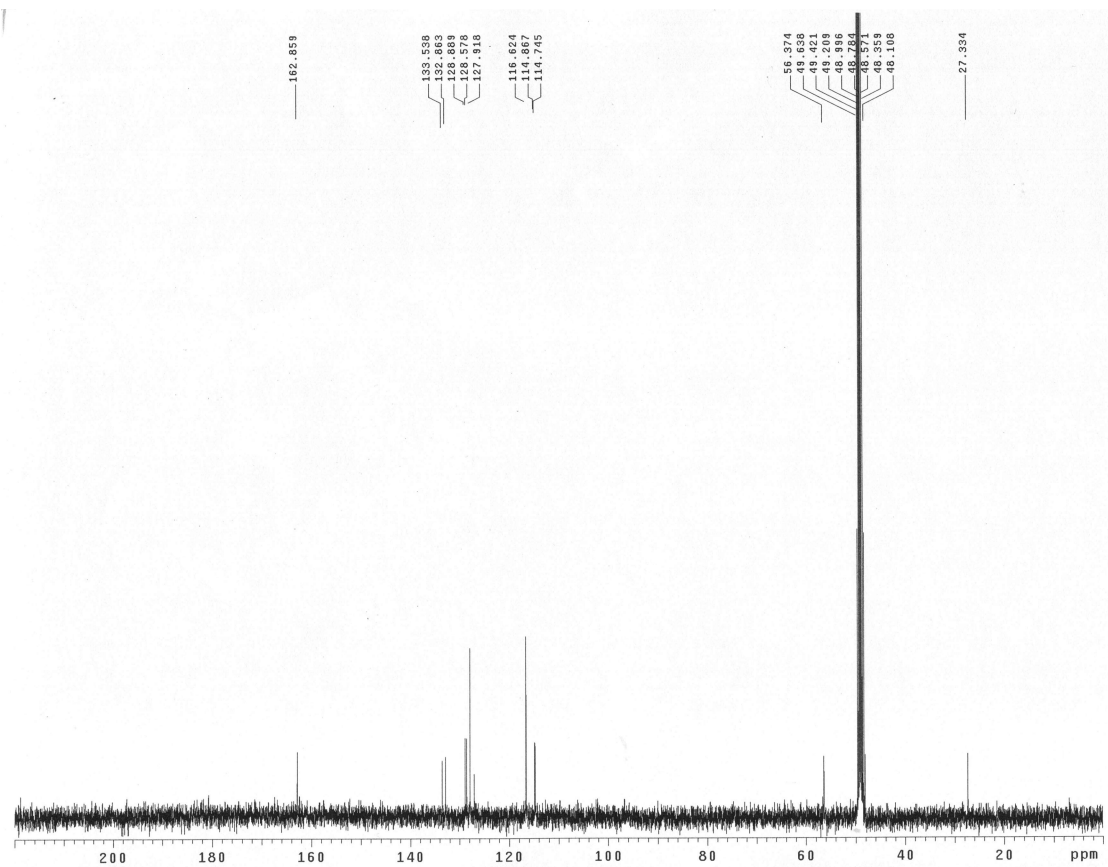

<sup>1</sup>H NMR (CD<sub>3</sub>OD, 400 MHz) spectrum of compound **1c**

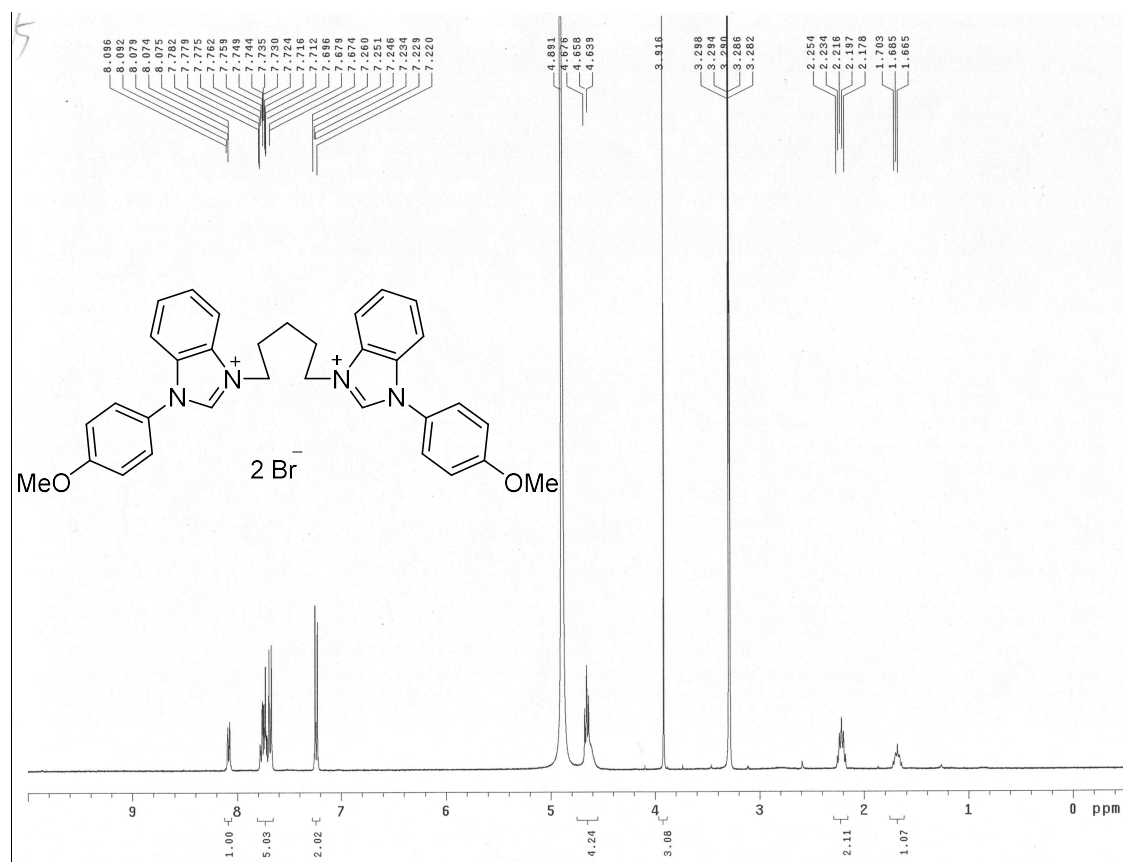

<sup>13</sup>C NMR (CD<sub>3</sub>OD, 100 MHz) spectrum of compound **1c**

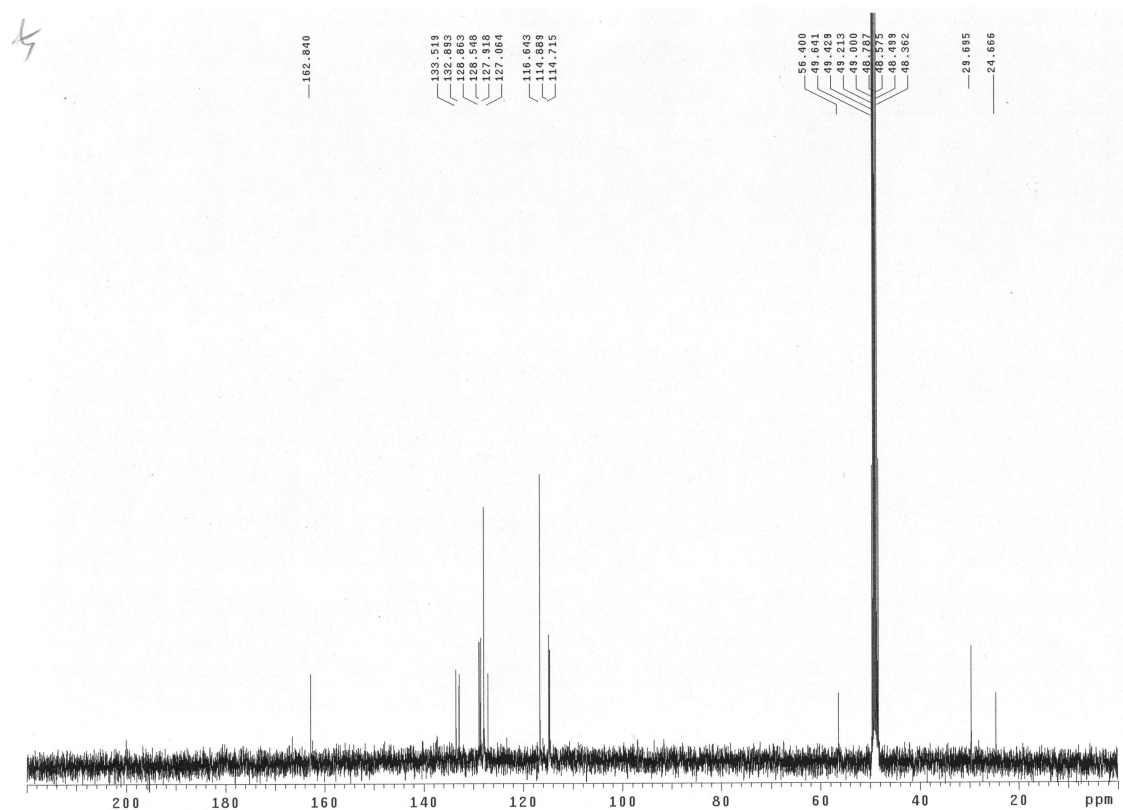

$^1\text{H}$  NMR (DMSO- $d_6$ , 400 MHz) spectrum of complex **1c-Ag**

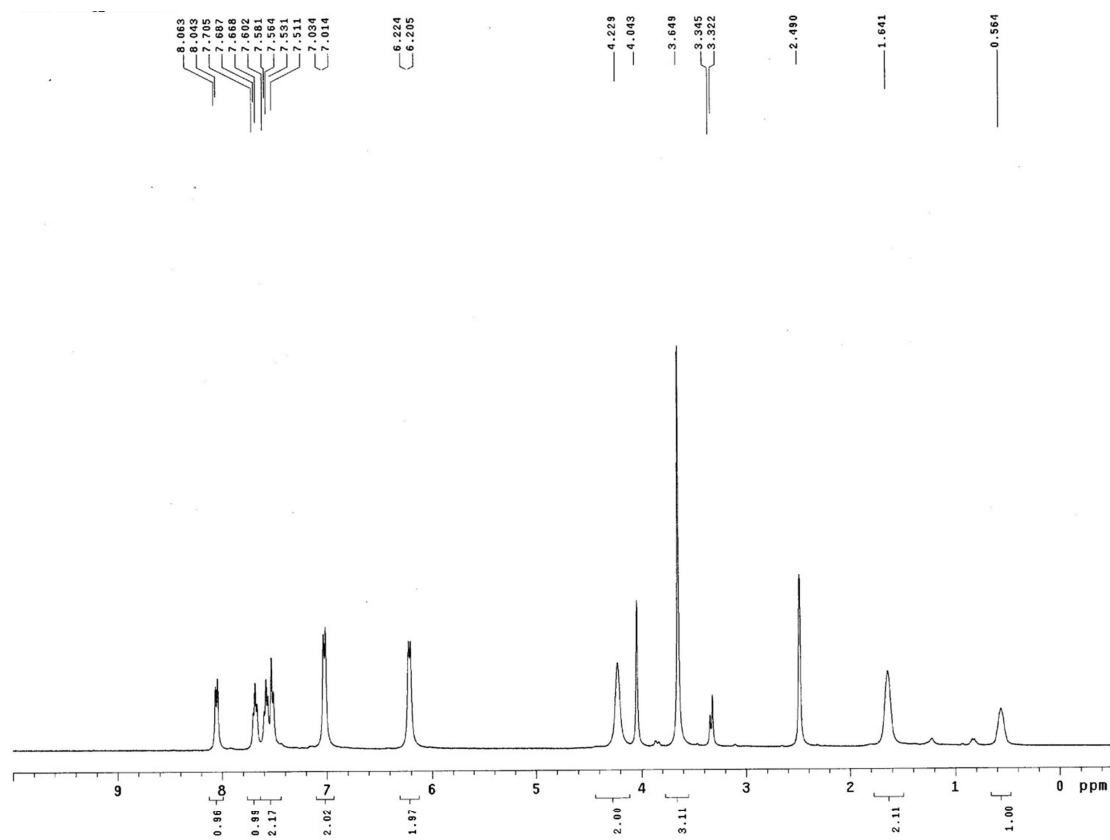

$^{13}\text{C}$  NMR (DMSO- $d_6$ , 100 MHz) spectrum of complex **1c-Ag**

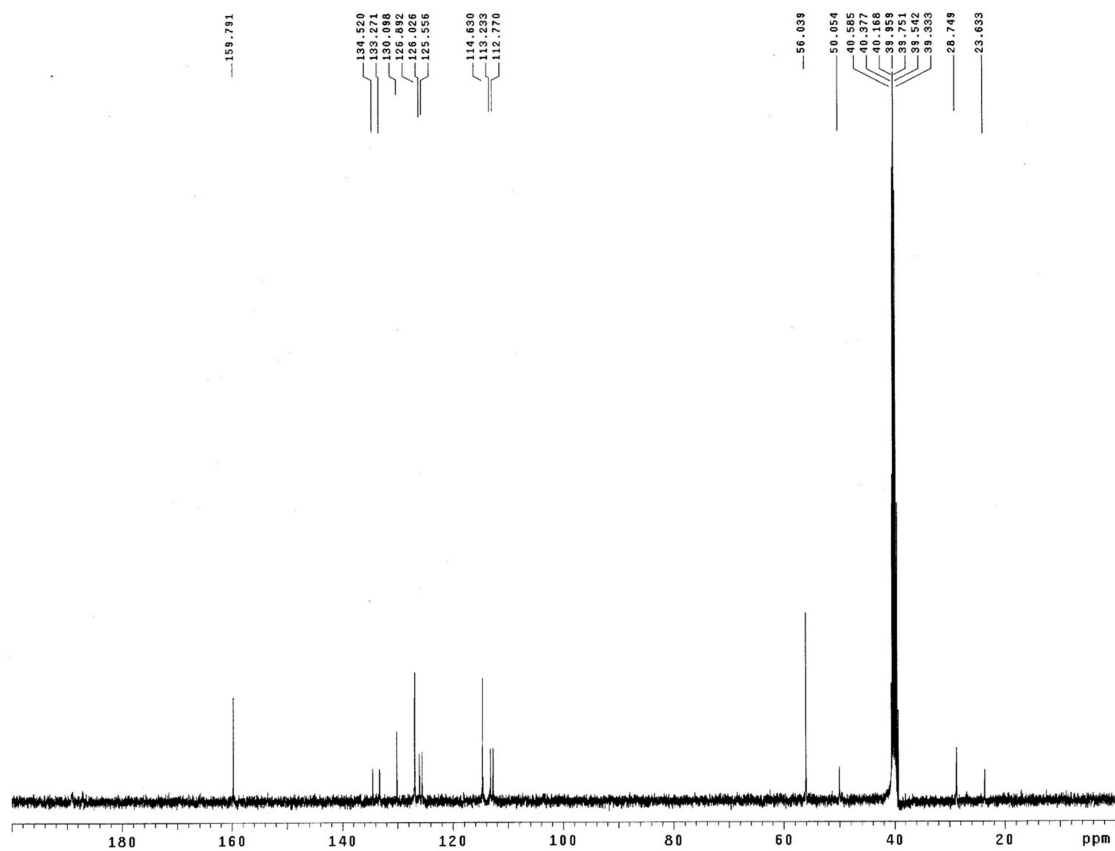

$^1\text{H}$  NMR ( $\text{CD}_2\text{Cl}_2$ , 400 MHz) spectrum of complex **1c-Pd**

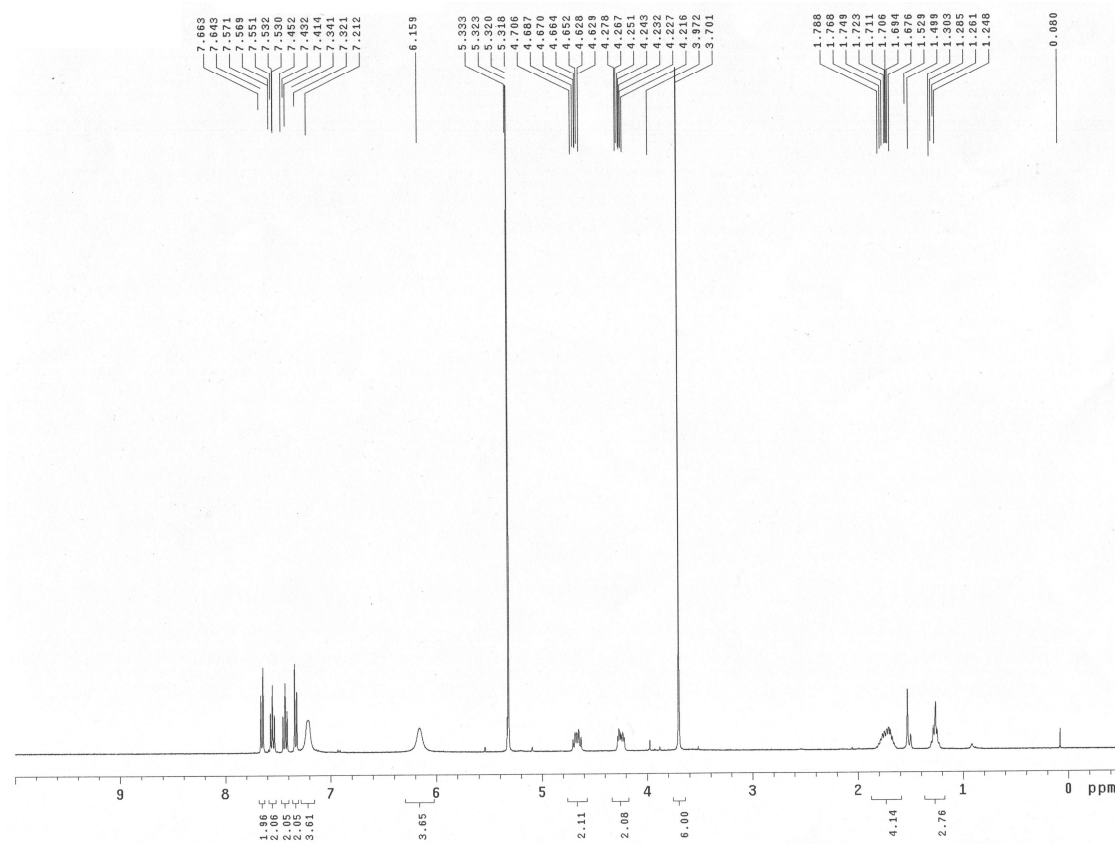

$^{13}\text{C}$  NMR ( $\text{CD}_2\text{Cl}_2$ , 100 MHz) spectrum of complex **1c-Pd**

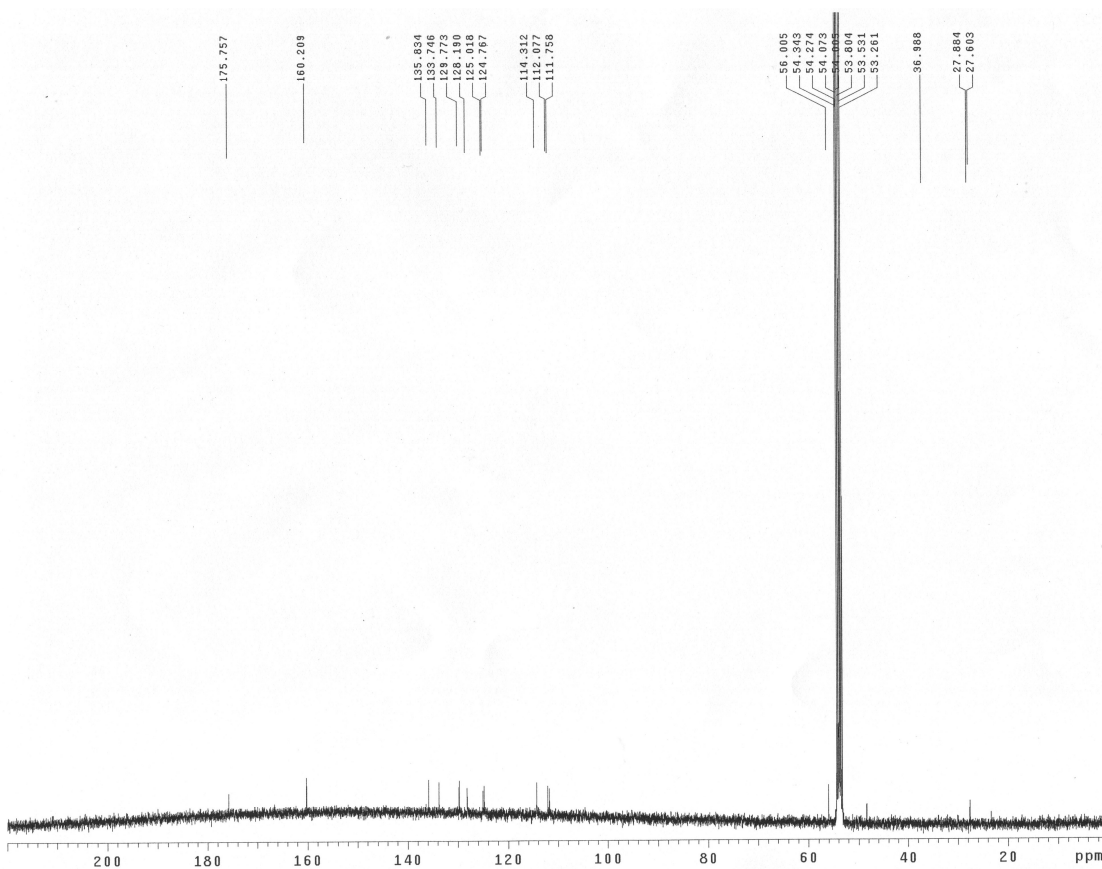

$^1\text{H}$  NMR ( $\text{CDCl}_3$ , 400 MHz) spectrum of compound **5aa** (table 2, entry 1)

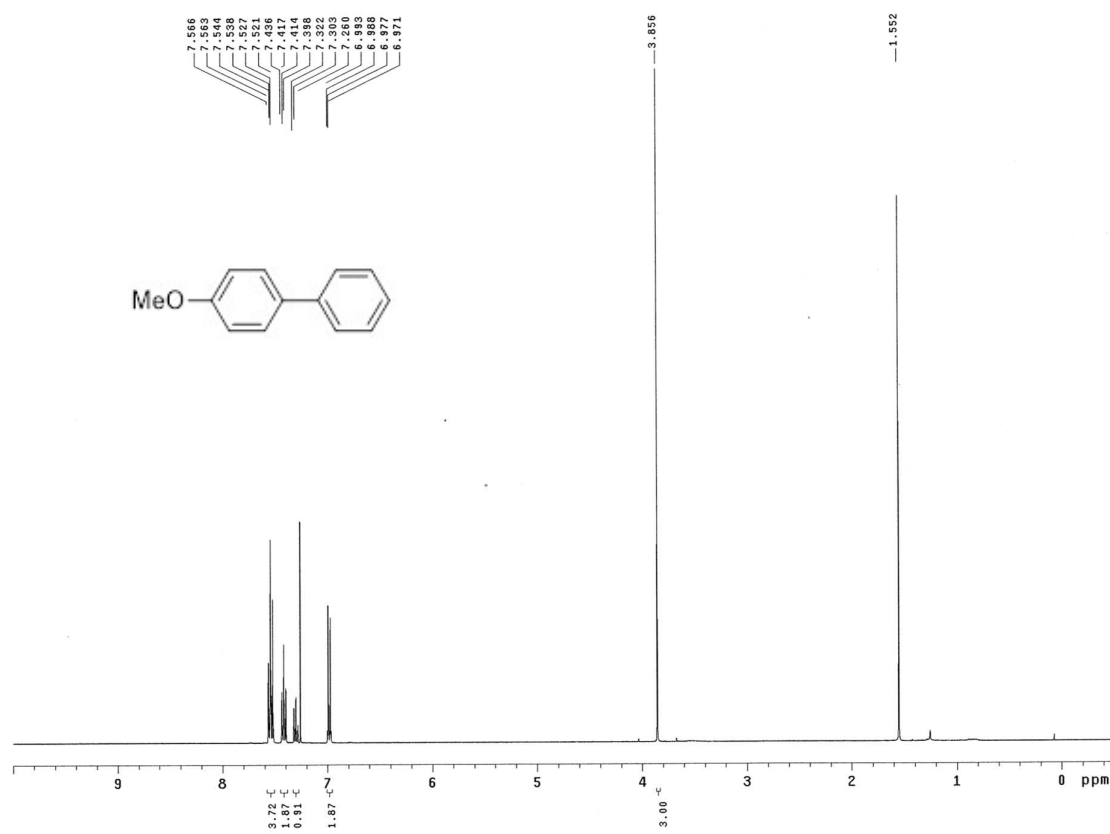

$^{13}\text{C}$  NMR ( $\text{CDCl}_3$ , 100 MHz) spectrum of compound **5aa**

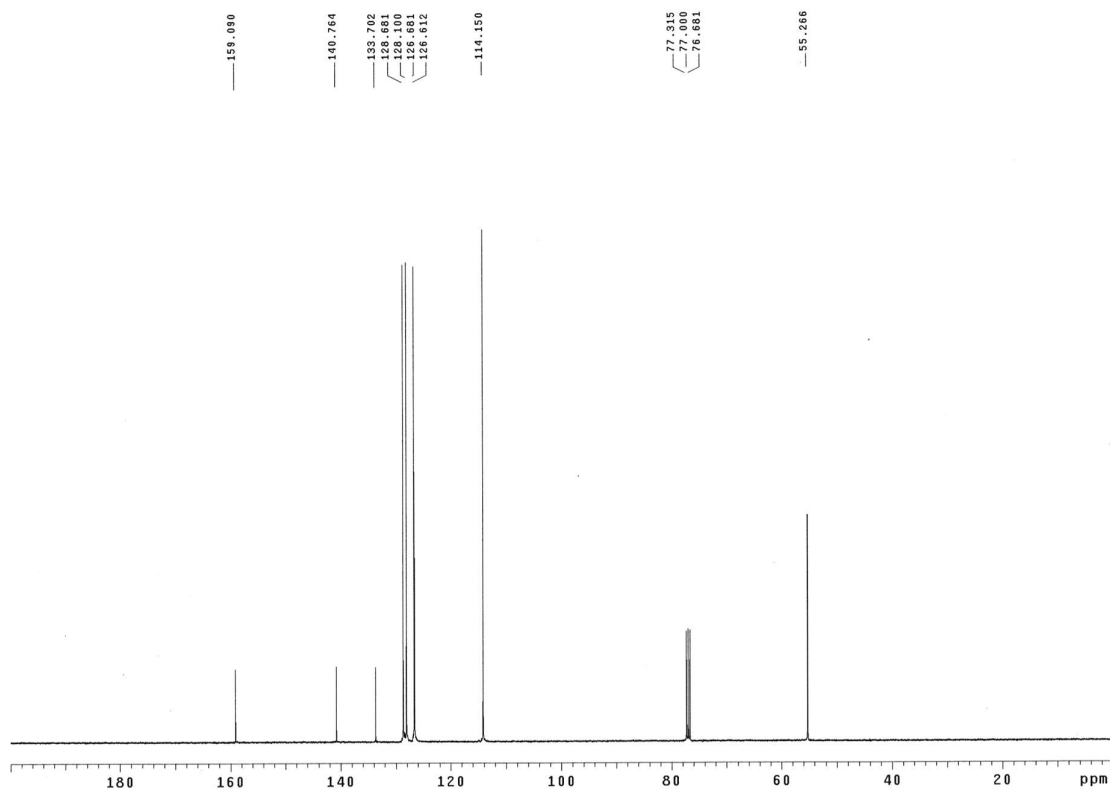

$^1\text{H}$  NMR ( $\text{CDCl}_3$ , 400 MHz) spectrum of compound **5ba** (table 2, entry 4)

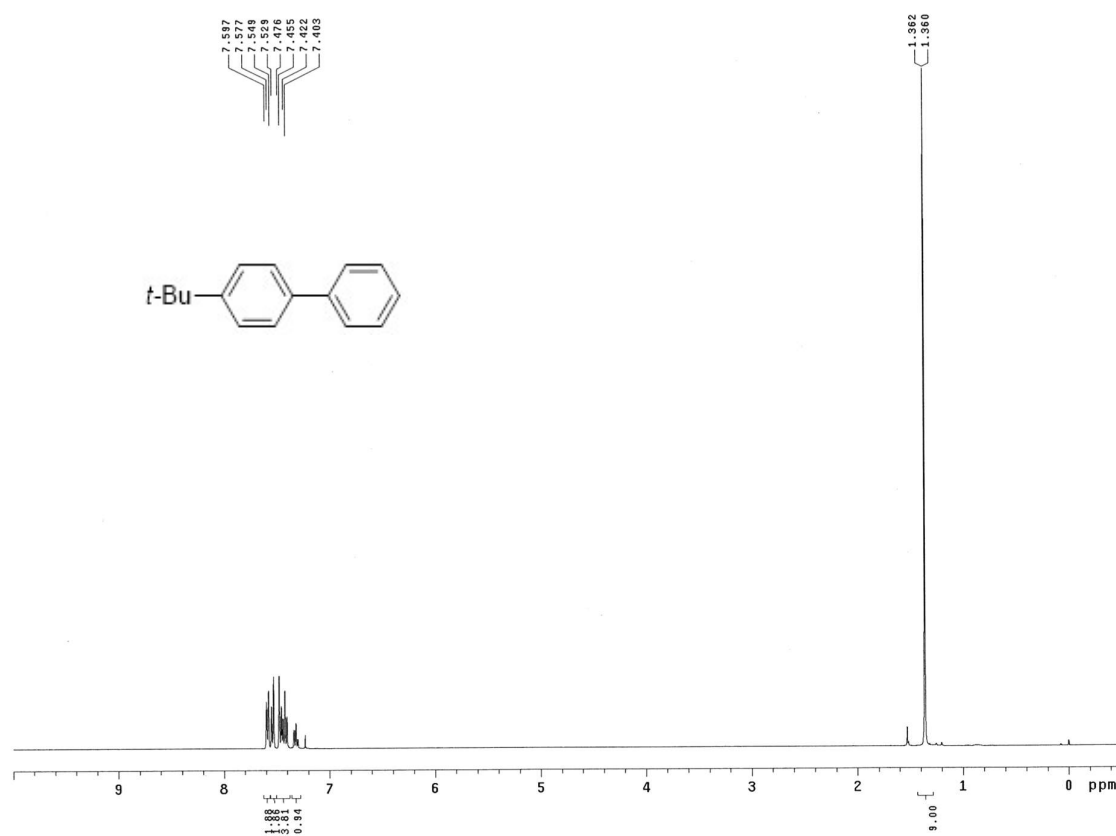

$^{13}\text{C}$  NMR ( $\text{CDCl}_3$ , 100 MHz) spectrum of compound **5ba**

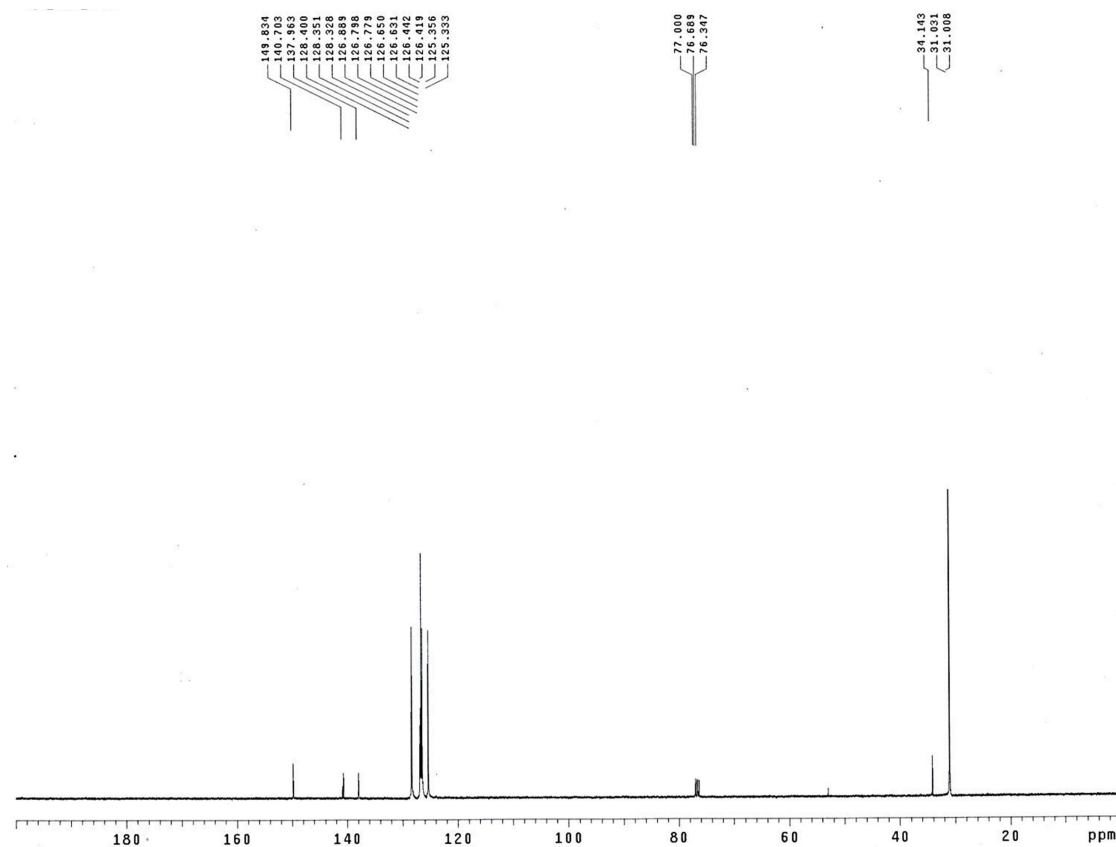

$^1\text{H}$  NMR ( $\text{CDCl}_3$ , 400 MHz) spectrum of compound **5ca** (table 2, entry 5)

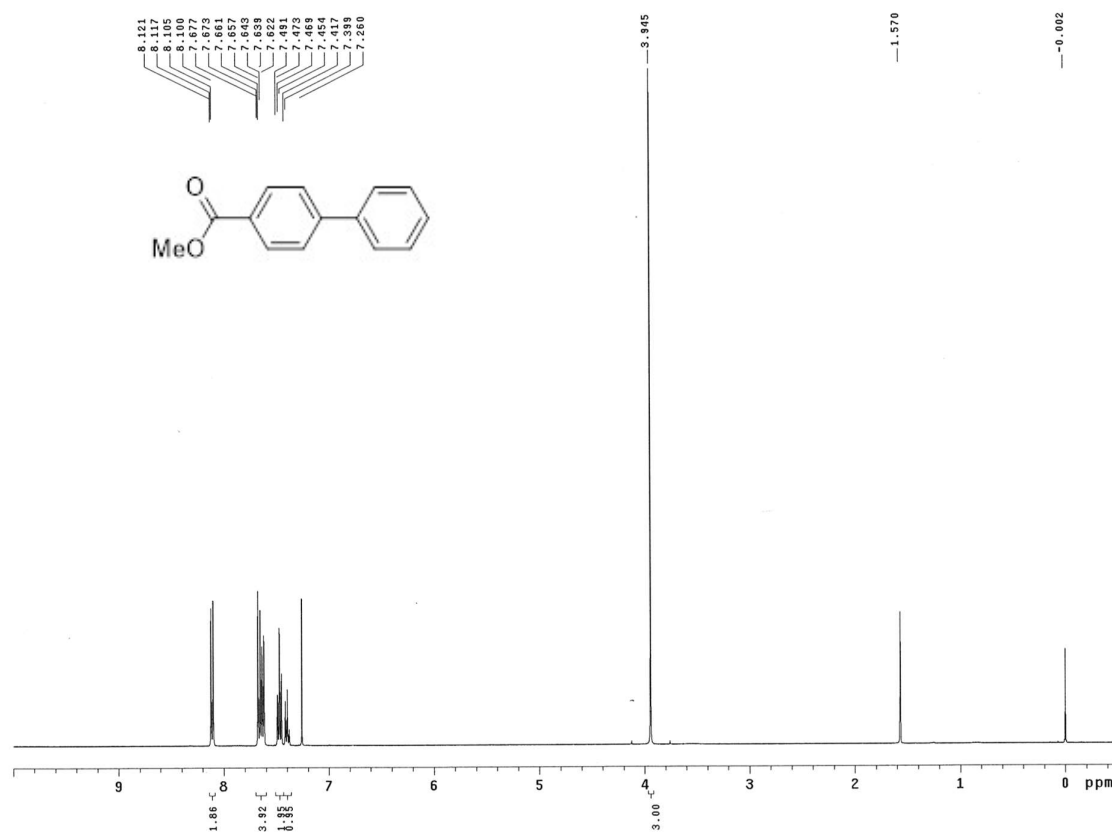

$^{13}\text{C}$  NMR ( $\text{CDCl}_3$ , 100 MHz) spectrum of compound **5ca**

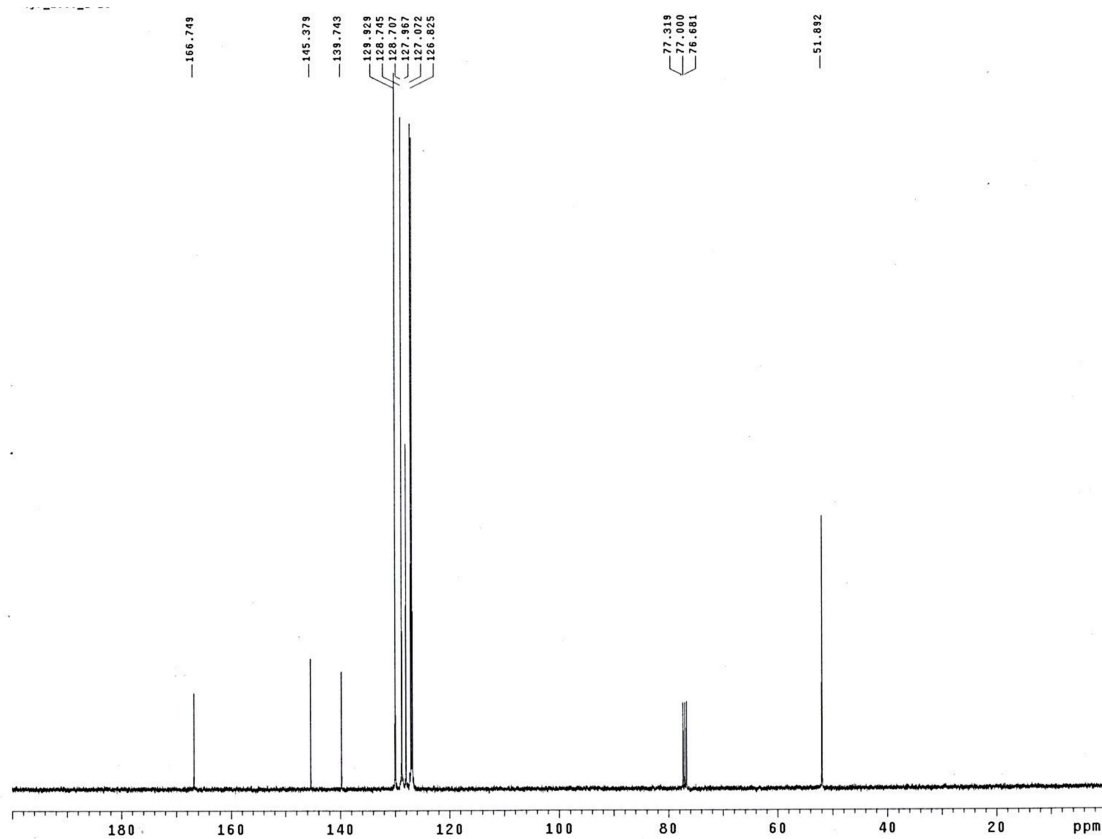

$^1\text{H}$  NMR ( $\text{CDCl}_3$ , 400 MHz) spectrum of compound **5da** (table 2, entry 6)

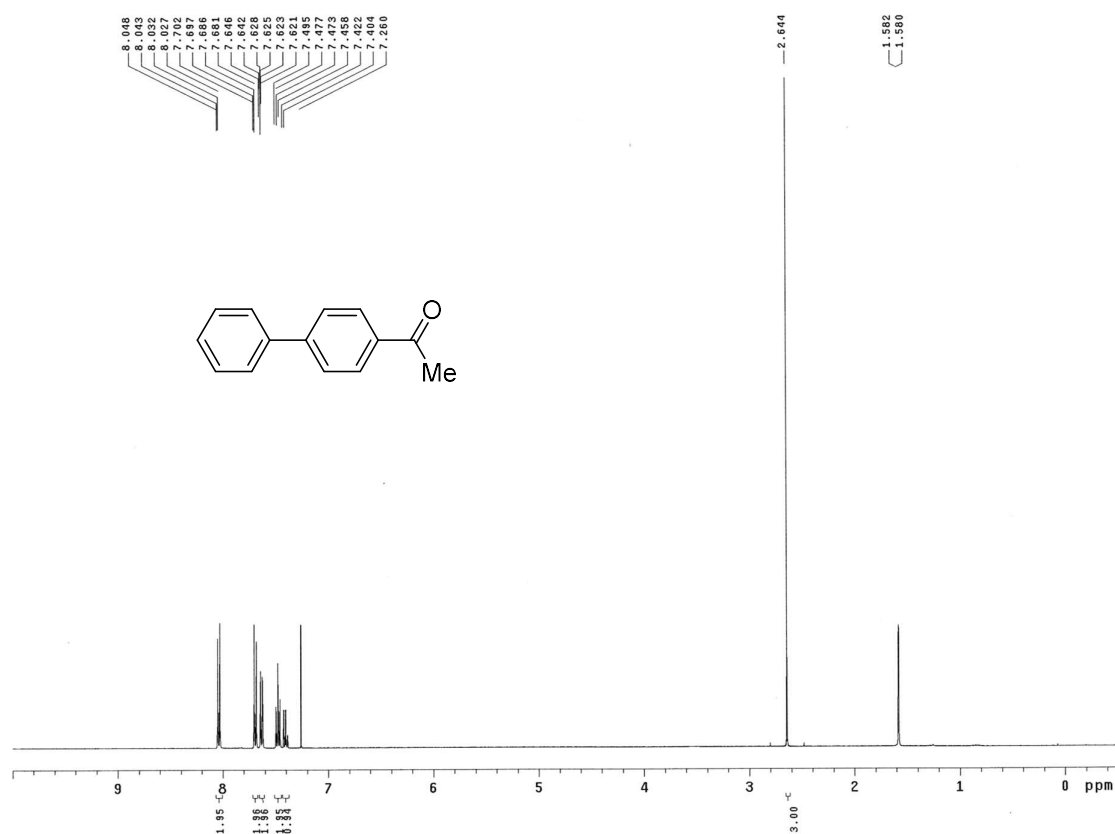

$^{13}\text{C}$  NMR ( $\text{CDCl}_3$ , 100 MHz) spectrum of compound **5da**

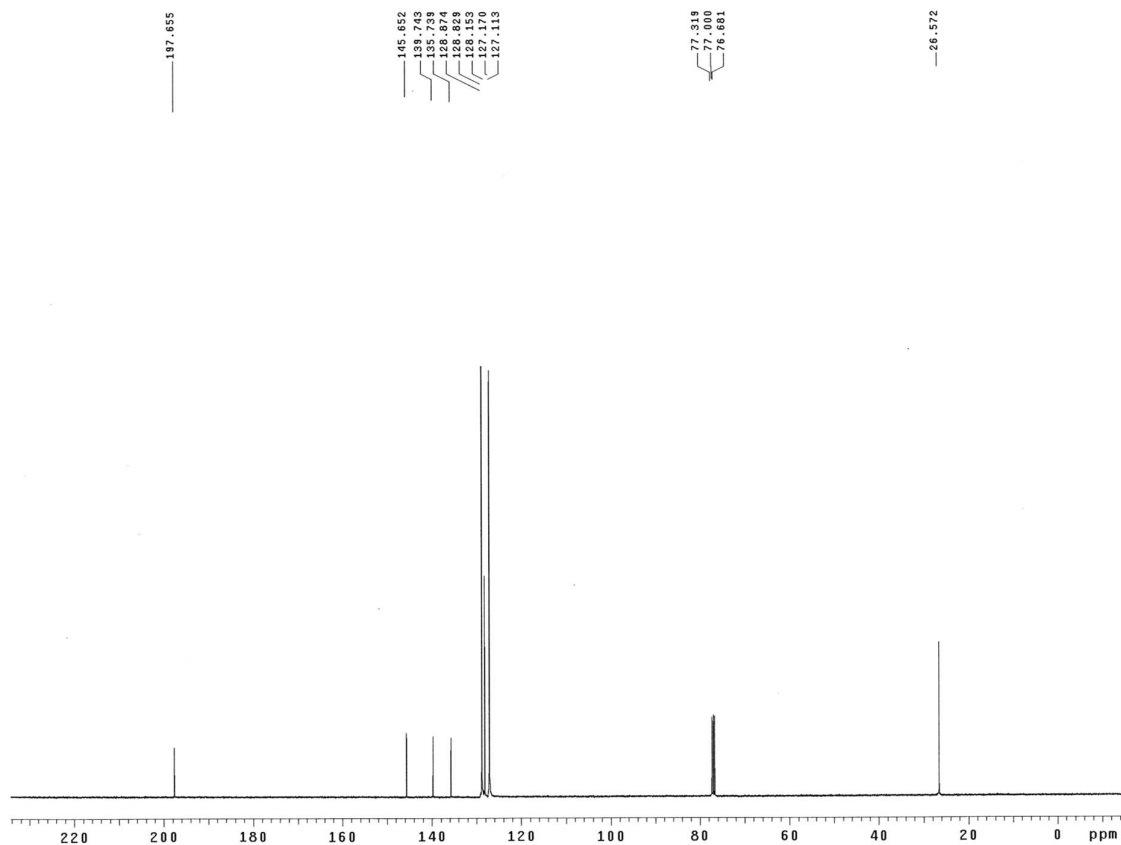



$^1\text{H}$  NMR ( $\text{CDCl}_3$ , 400 MHz) spectrum of compound **5ea** (table 2, entry 9)

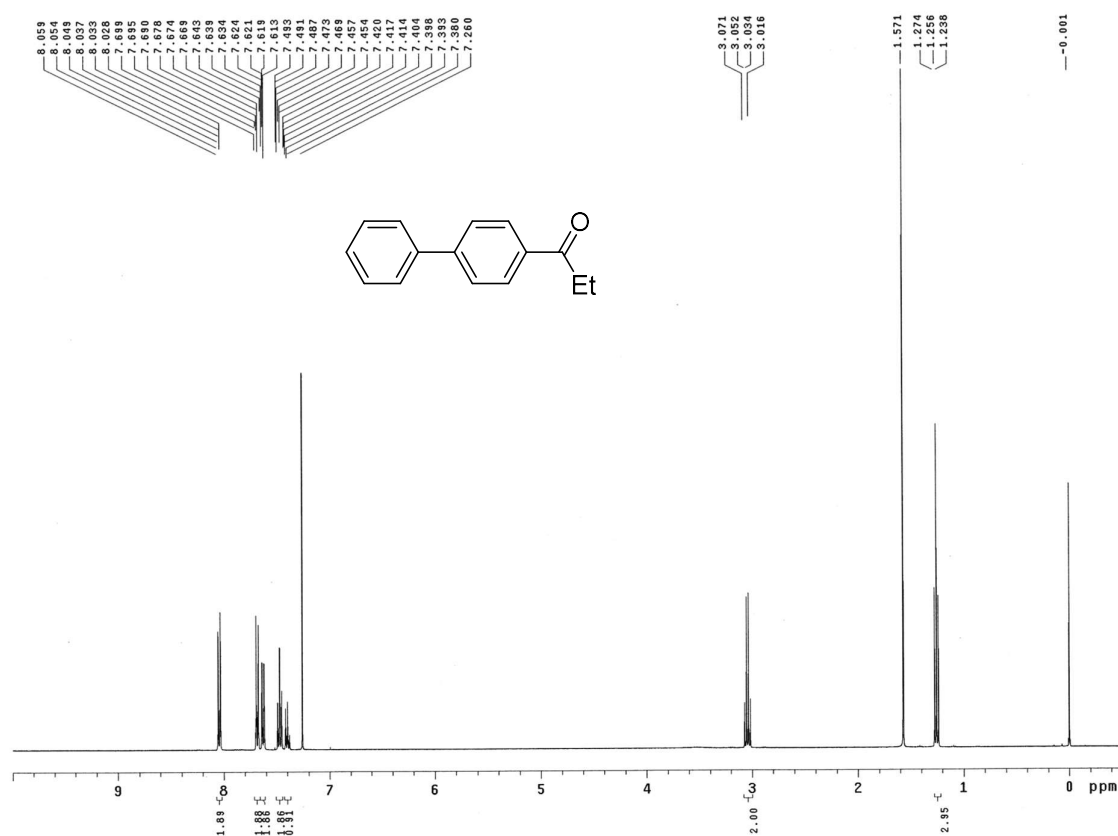

$^{13}\text{C}$  NMR ( $\text{CDCl}_3$ , 100 MHz) spectrum of compound **5ea**

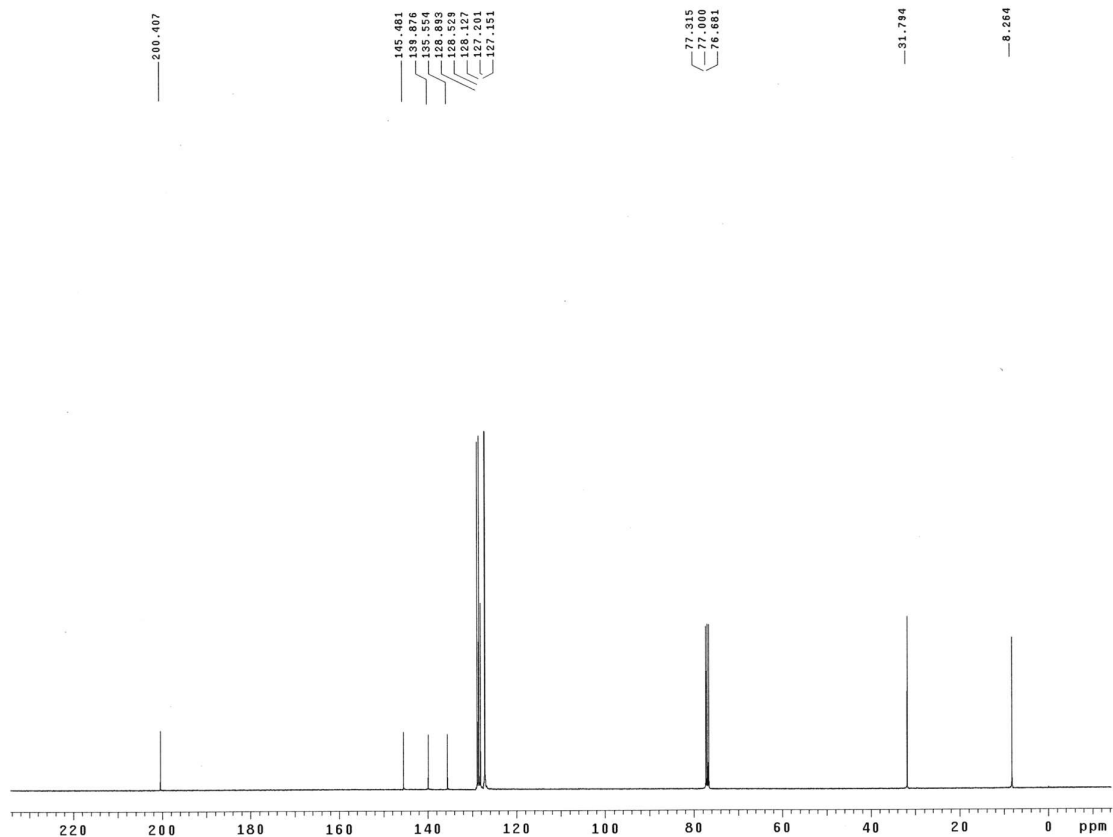

$^1\text{H}$  NMR ( $\text{CDCl}_3$ , 400 MHz) spectrum of compound **5fa** (table 2, entry 12)

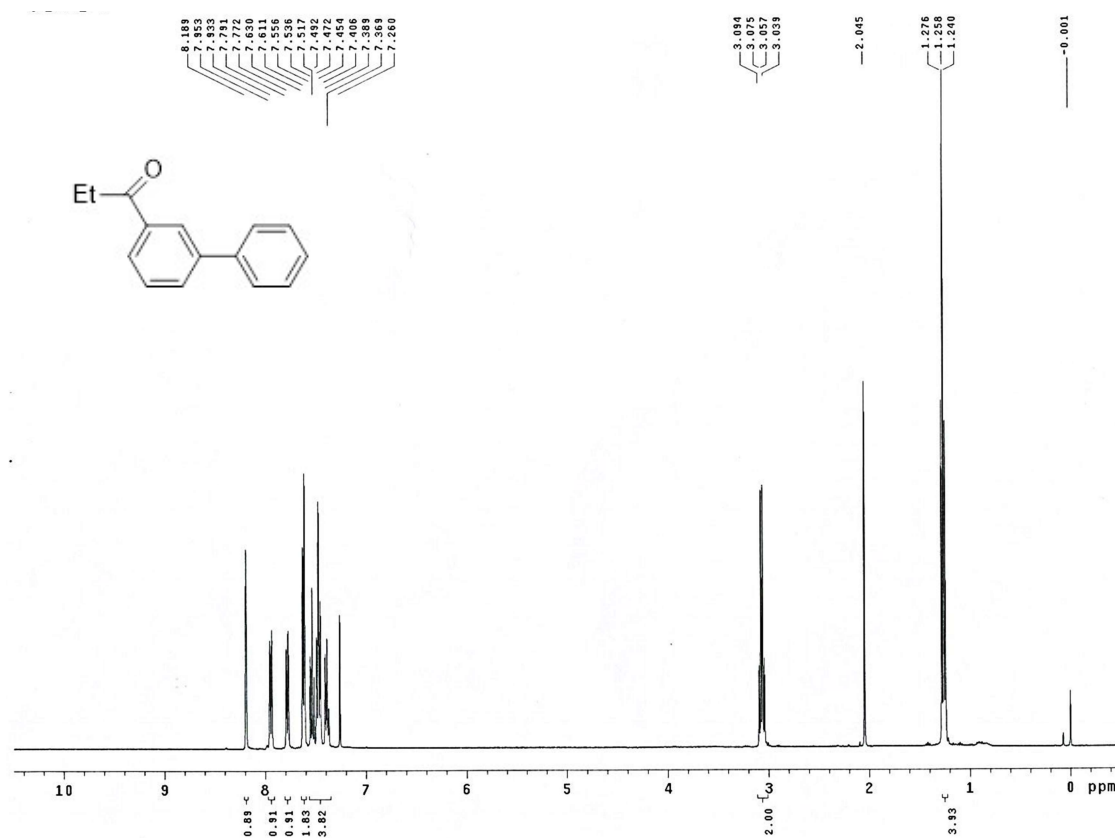

$^{13}\text{C}$  NMR ( $\text{CDCl}_3$ , 100 MHz) spectrum of compound **5fa**

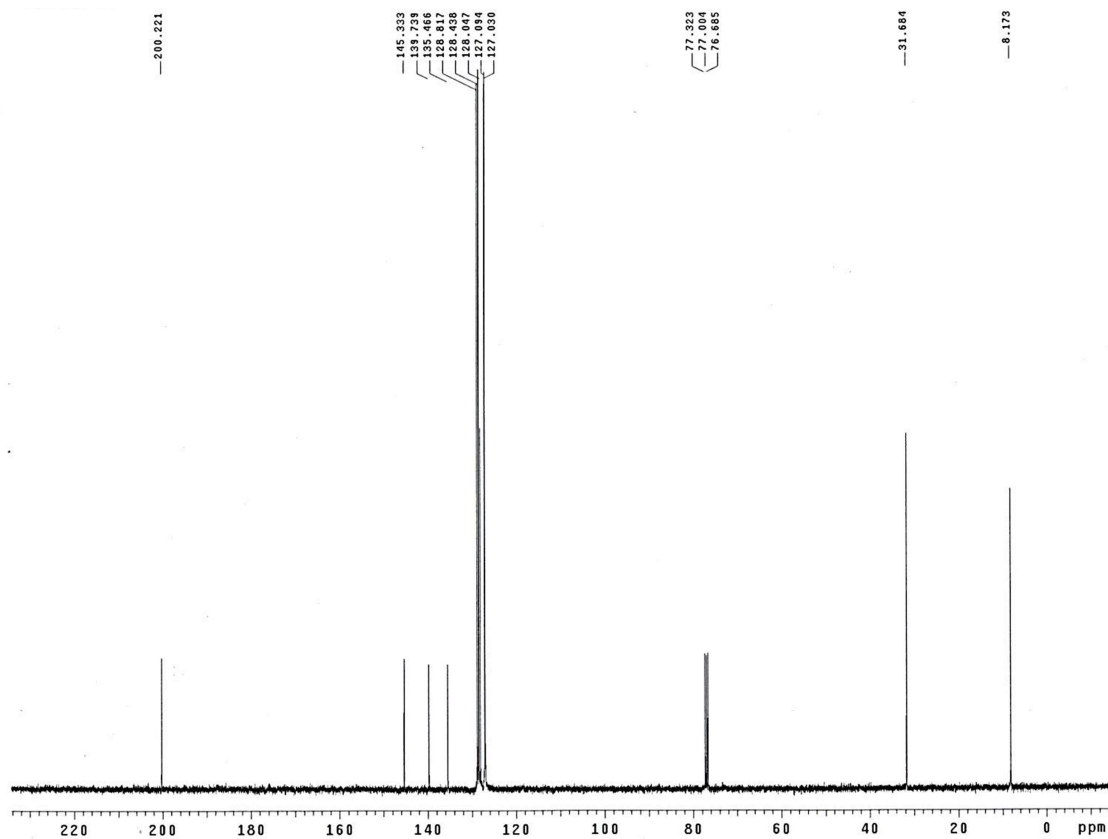

$^1\text{H}$  NMR ( $\text{CDCl}_3$ , 400 MHz) spectrum of compound **5ga** (table 2, entry 13)

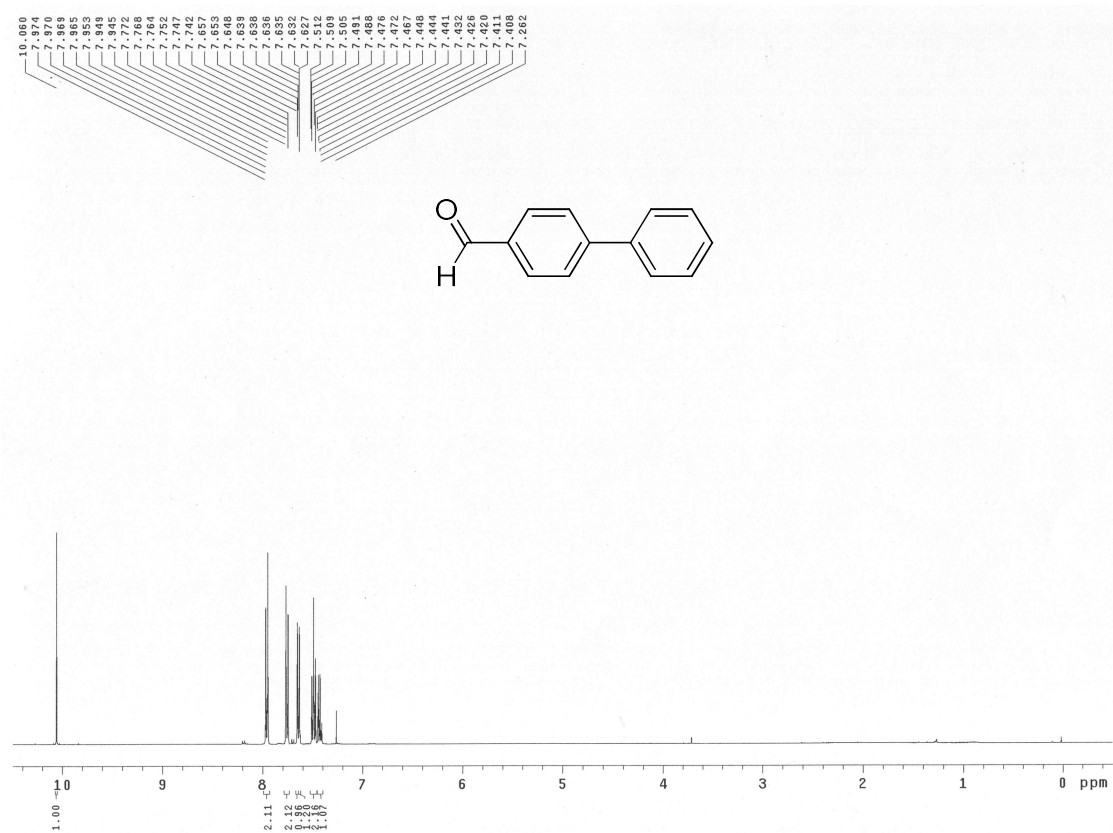

$^{13}\text{C}$  NMR ( $\text{CDCl}_3$ , 100 MHz) spectrum of compound **5ga**

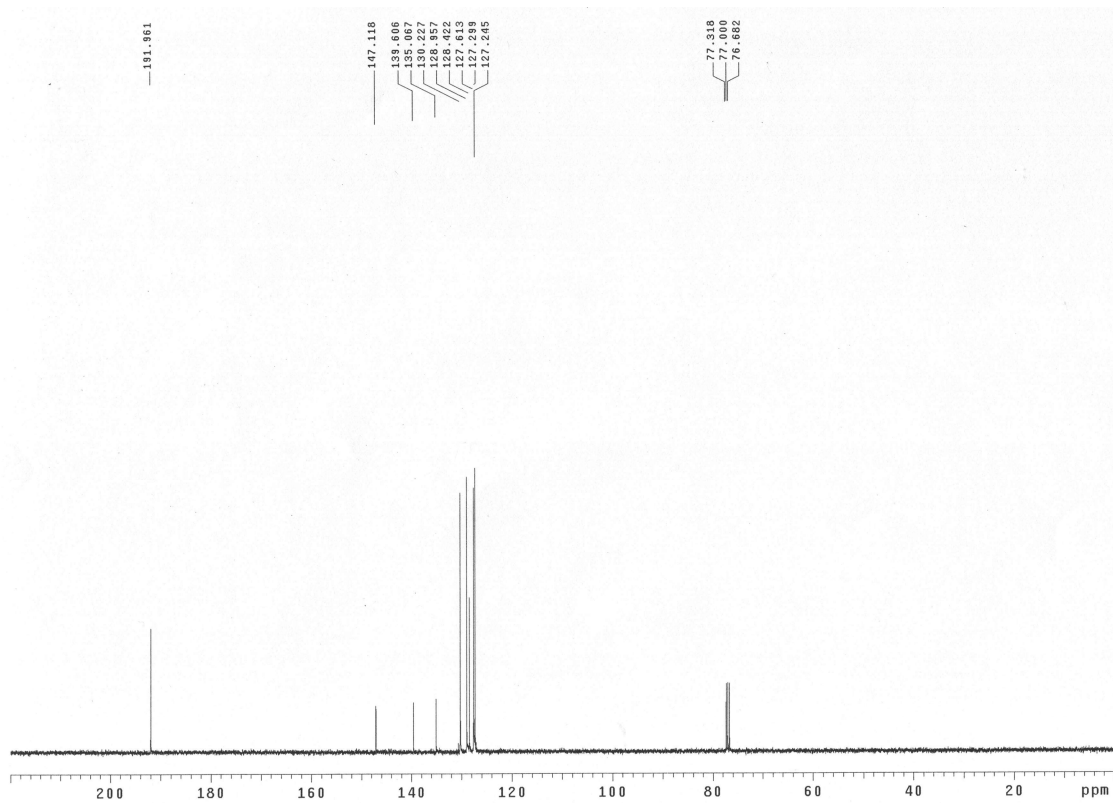

$^1\text{H}$  NMR ( $\text{CDCl}_3$ , 400 MHz) spectrum of compound **5ha** (table 2, entry 14)

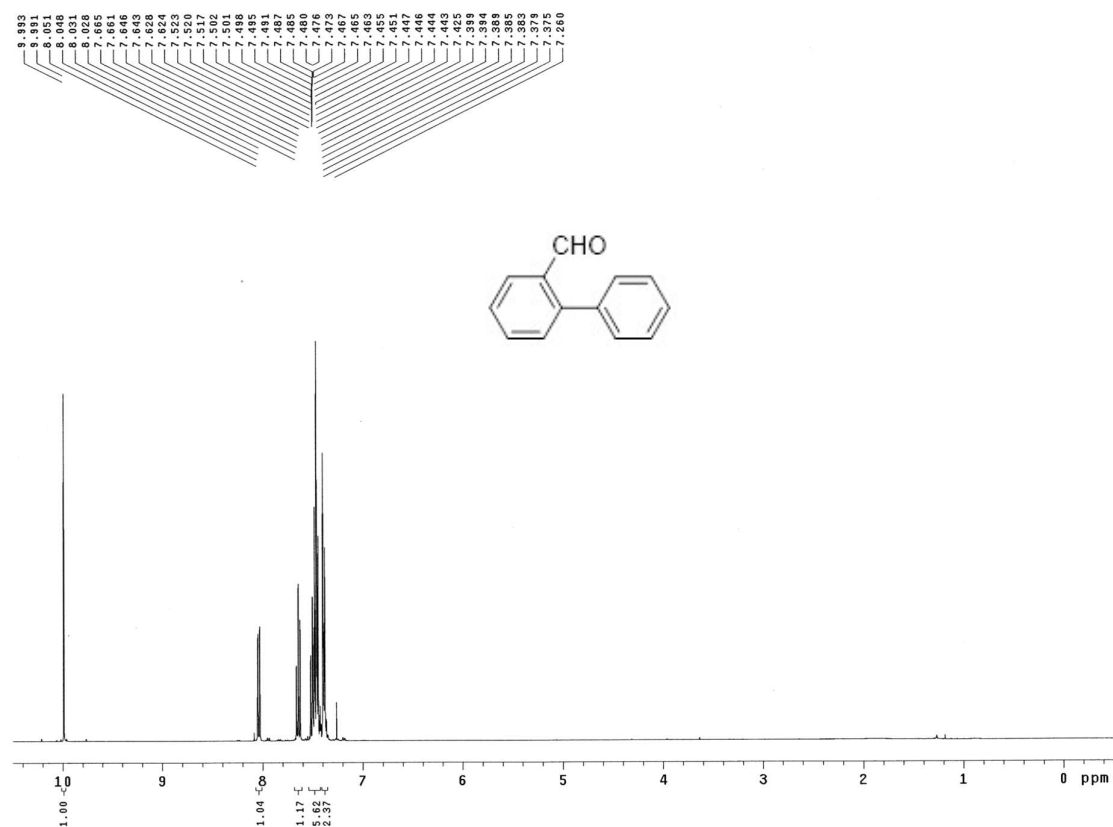

$^{13}\text{C}$  NMR ( $\text{CDCl}_3$ , 100 MHz) spectrum of compound **5ha**

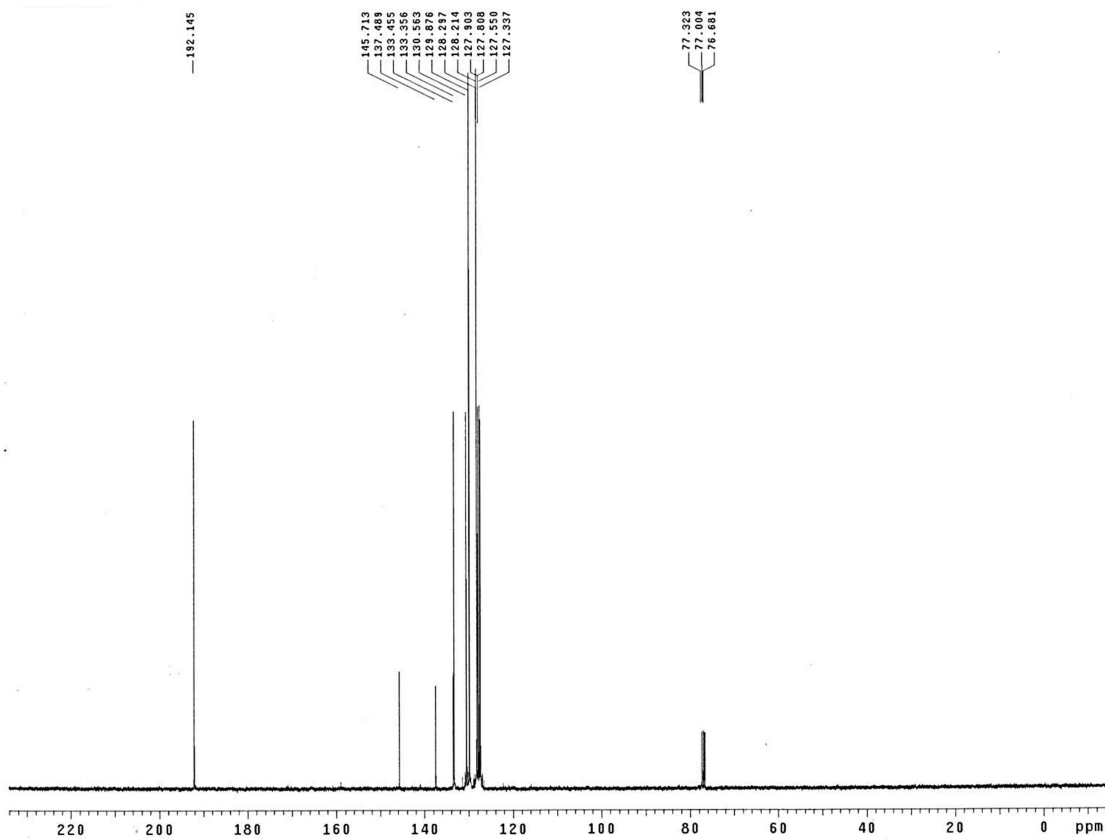

$^1\text{H}$  NMR ( $\text{CDCl}_3$ , 400 MHz) spectrum of compound **5ia** (table 2, entry 15)

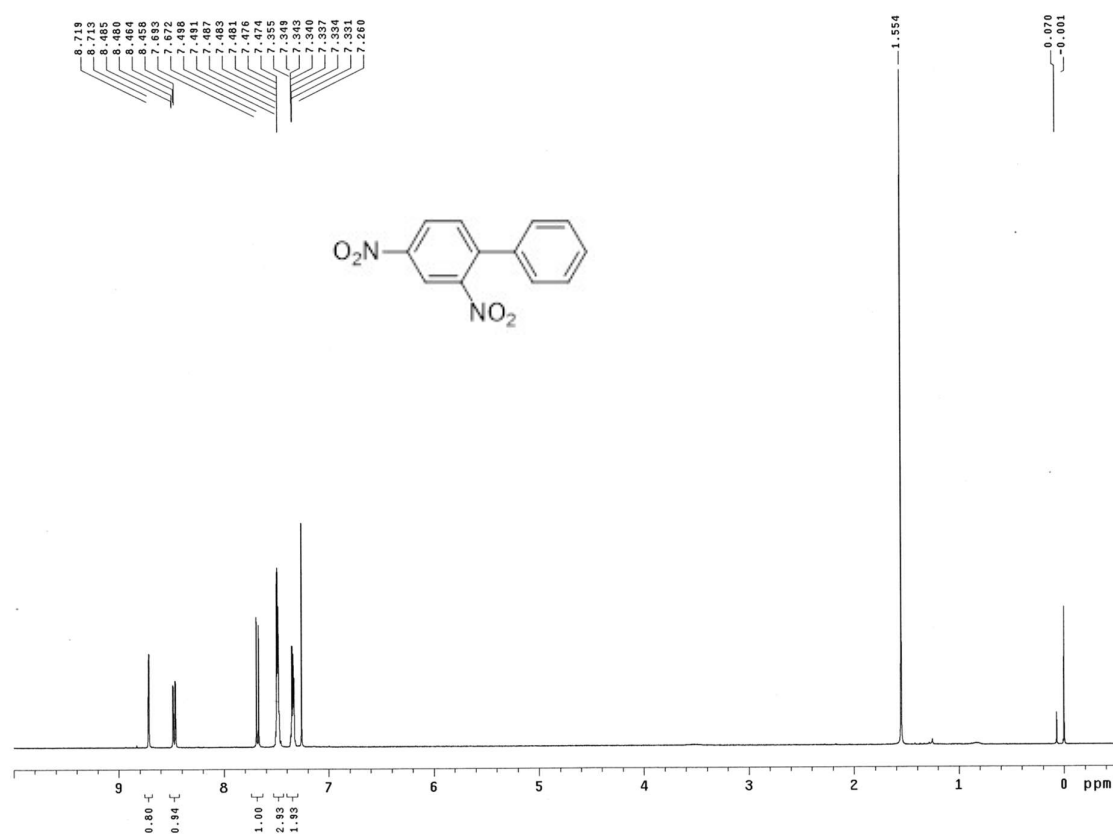

$^{13}\text{C}$  NMR ( $\text{CDCl}_3$ , 100 MHz) spectrum of compound **5ia**

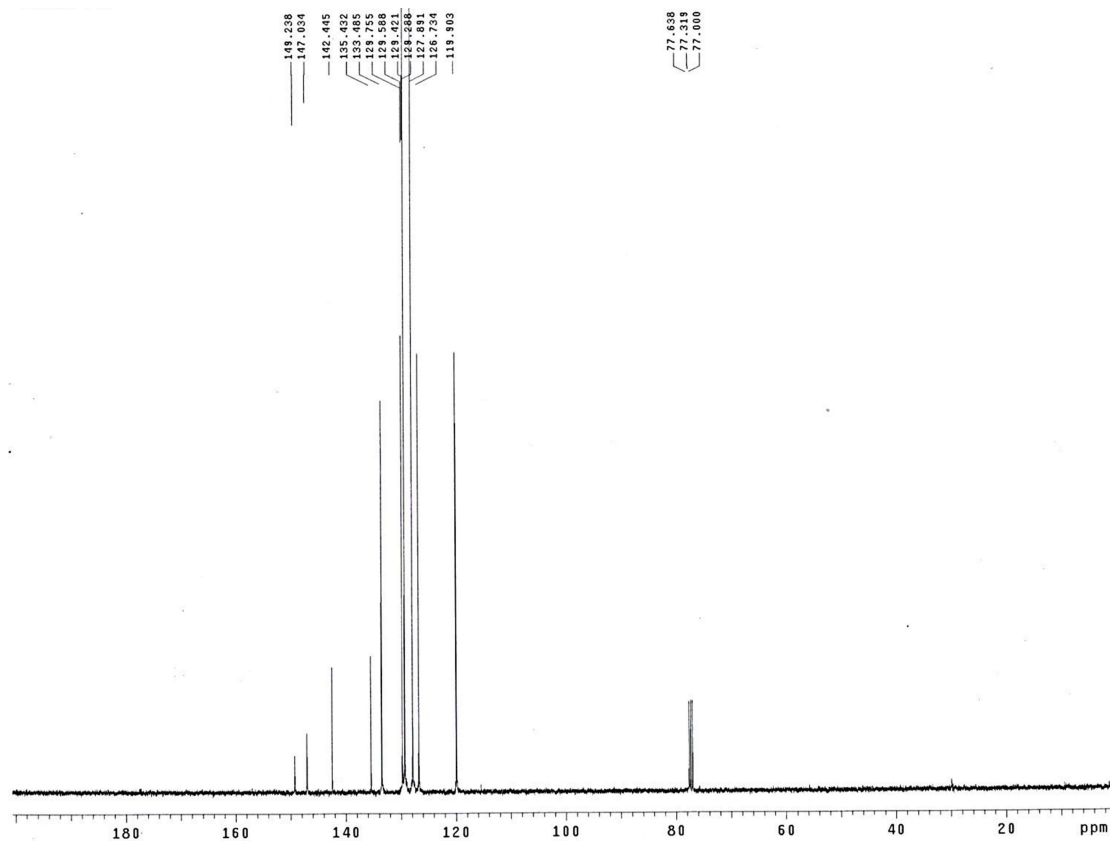

$^1\text{H}$  NMR ( $\text{CDCl}_3$ , 400 MHz) spectrum of compound **5ja** (table 2, entry 16)

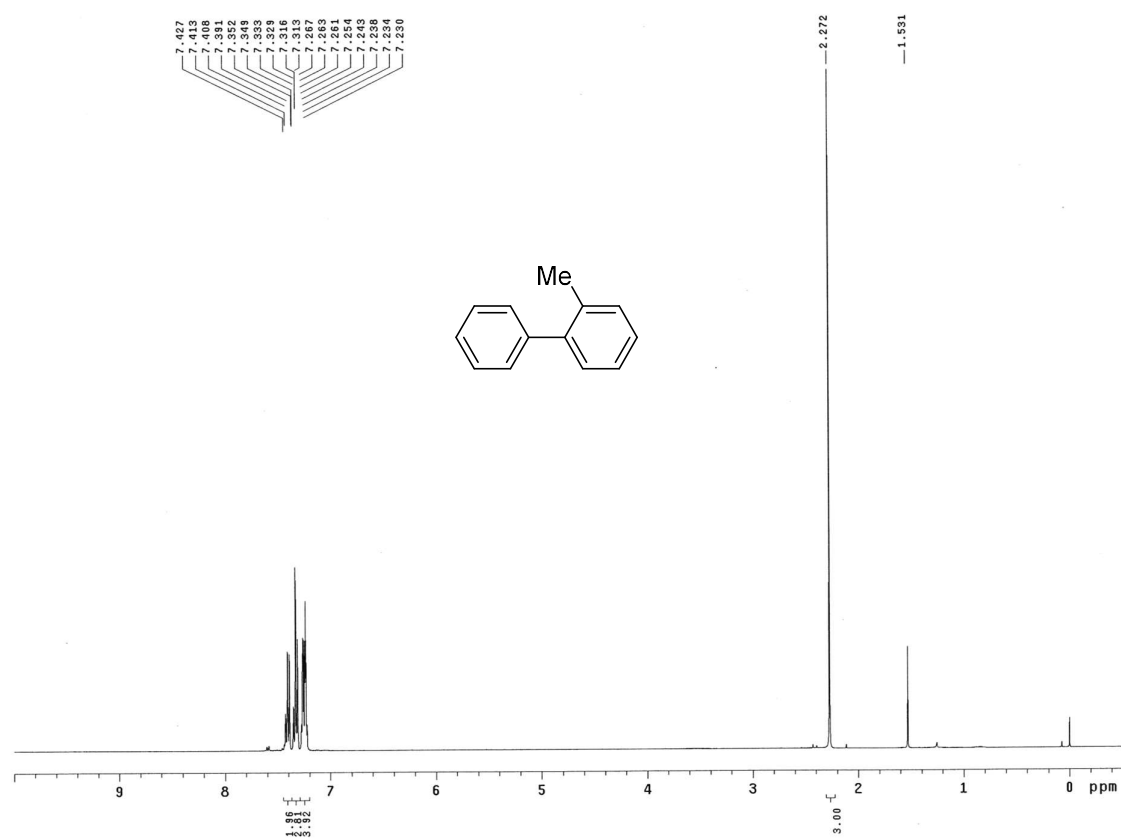

$^{13}\text{C}$  NMR ( $\text{CDCl}_3$ , 100 MHz) spectrum of compound **5ja**

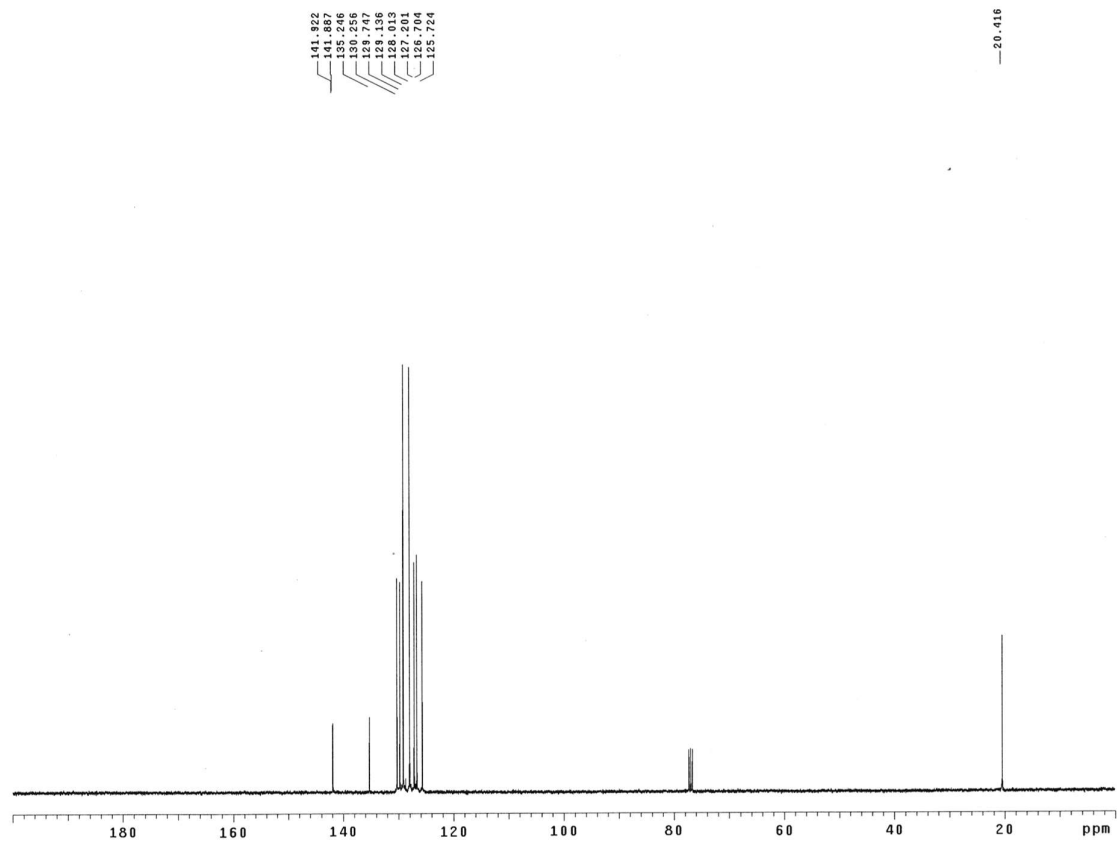

$^1\text{H}$  NMR ( $\text{CDCl}_3$ , 400 MHz) spectrum of compound **5ka** (table 2, entry 17)

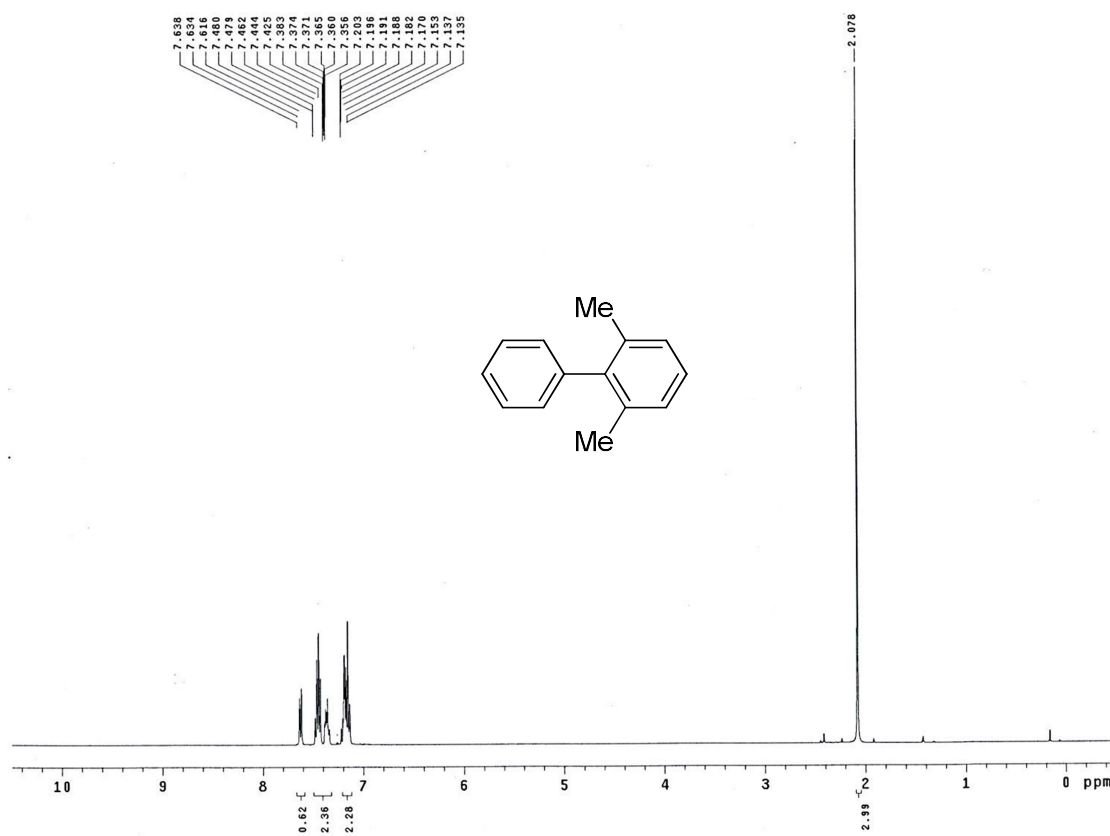

$^{13}\text{C}$  NMR ( $\text{CDCl}_3$ , 100 MHz) spectrum of compound **5ka**

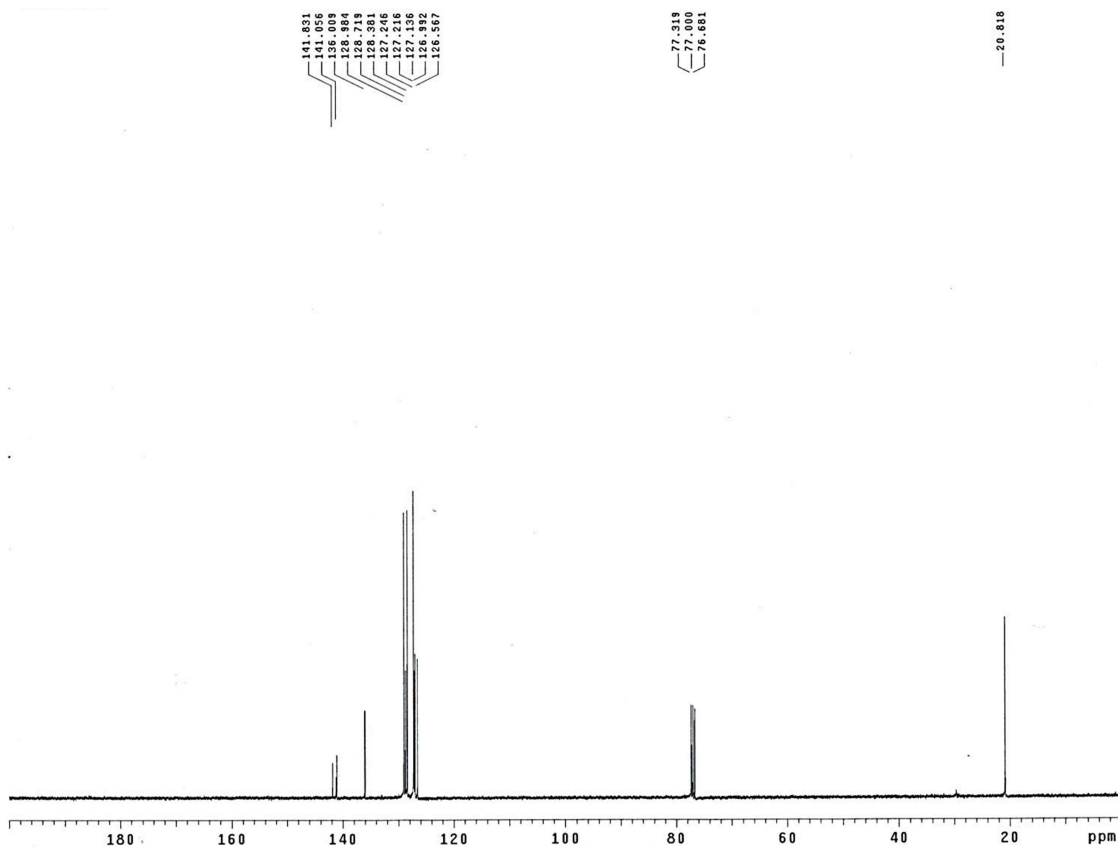

$^1\text{H}$  NMR ( $\text{CDCl}_3$ , 400 MHz) spectrum of compound **5la** (table 2, entry 18)

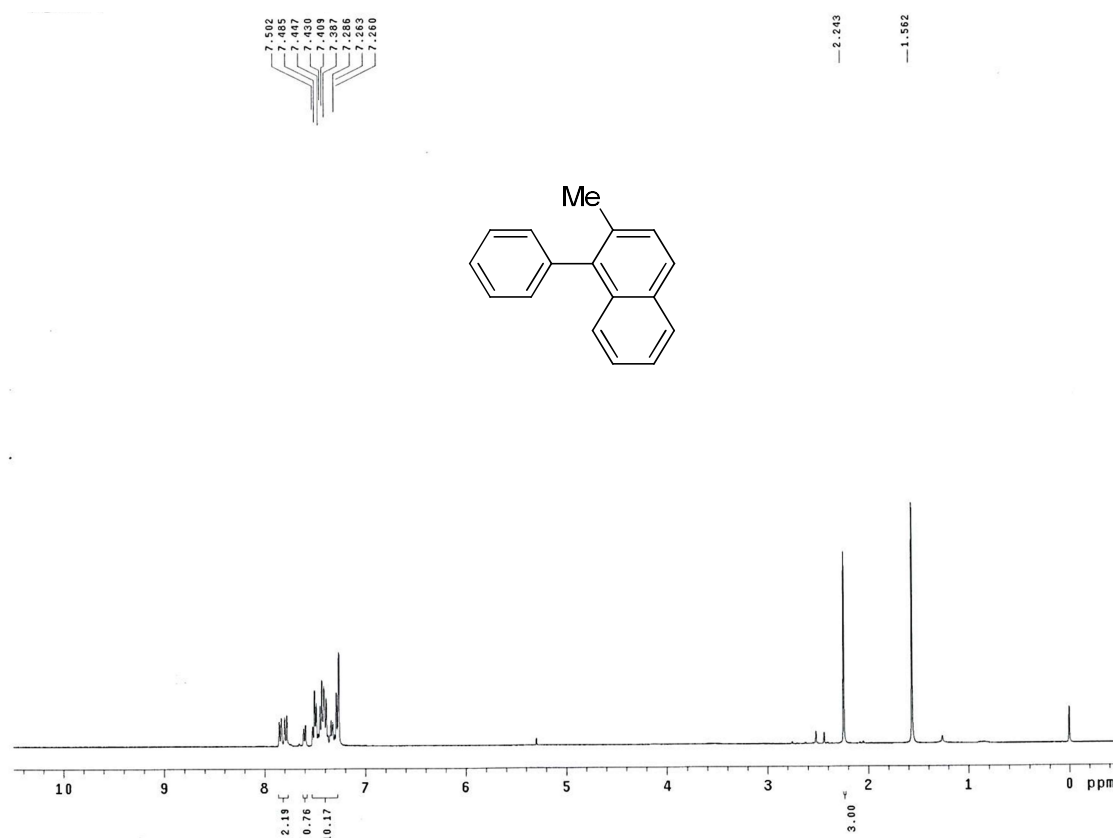

$^{13}\text{C}$  NMR ( $\text{CDCl}_3$ , 100 MHz) spectrum of compound **5la**

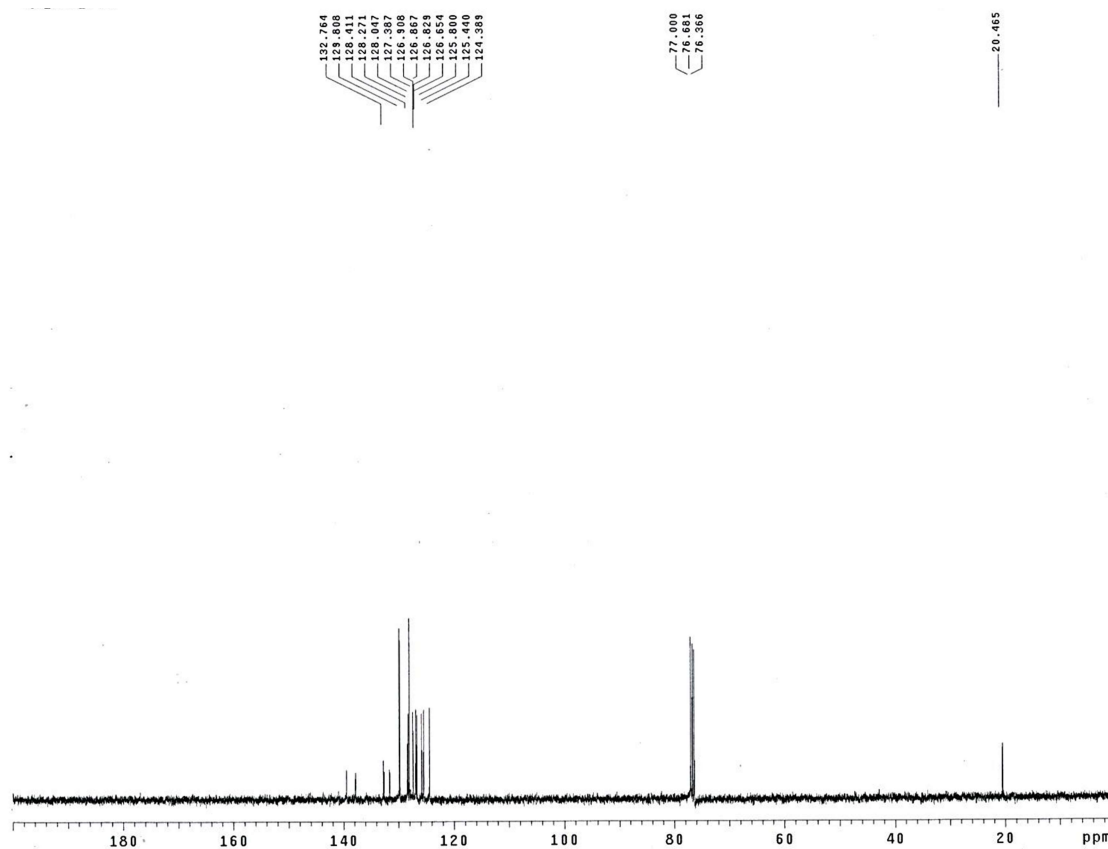



$^1\text{H}$  NMR ( $\text{CDCl}_3$ , 400 MHz) spectrum of compound **5ma** (table 2, entry 19)

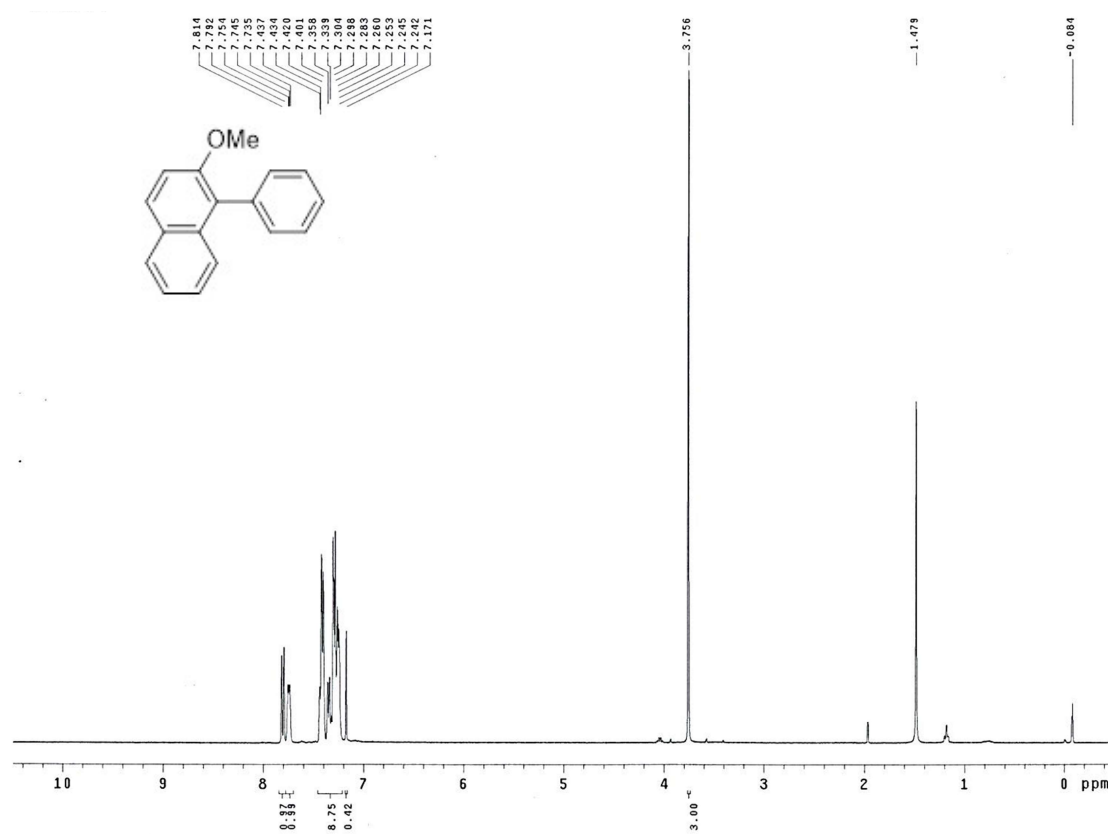

$^{13}\text{C}$  NMR ( $\text{CDCl}_3$ , 100 MHz) spectrum of compound **5ma**

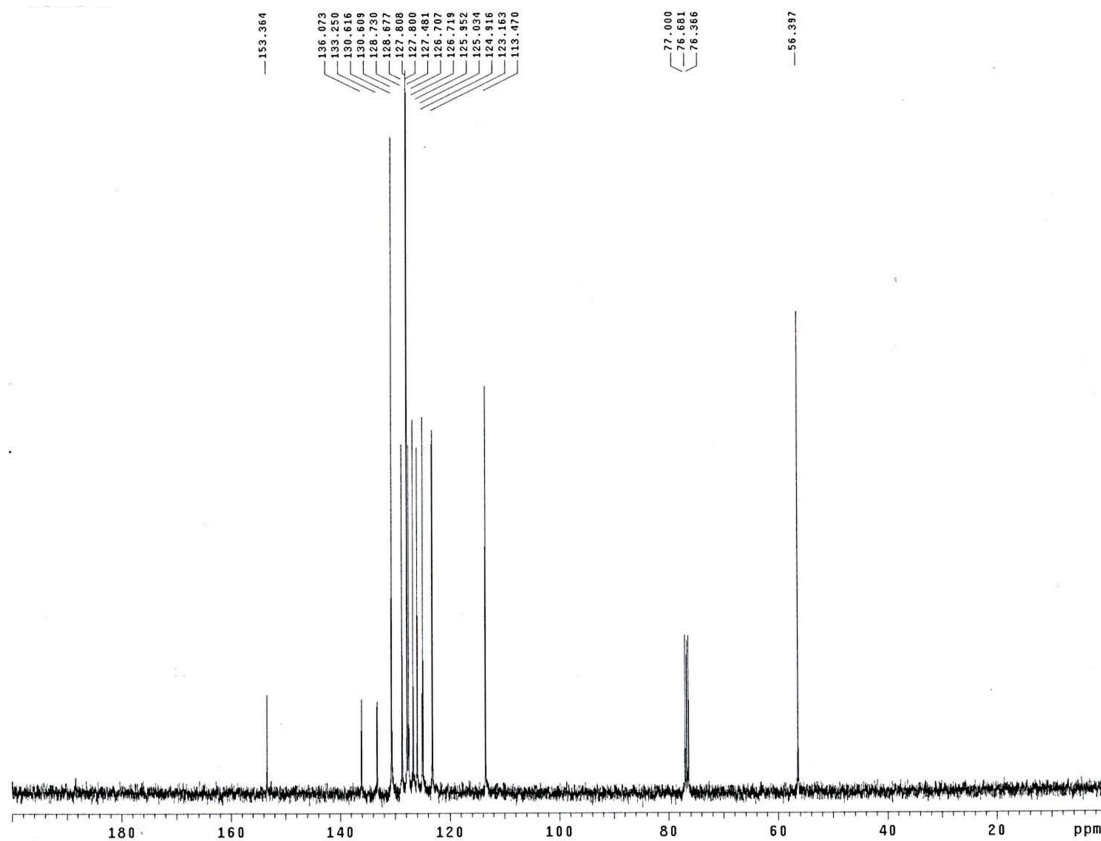

<sup>1</sup>H NMR (CDCl<sub>3</sub>, 400 MHz) spectrum of compound **5na** (table 2, entry 20)

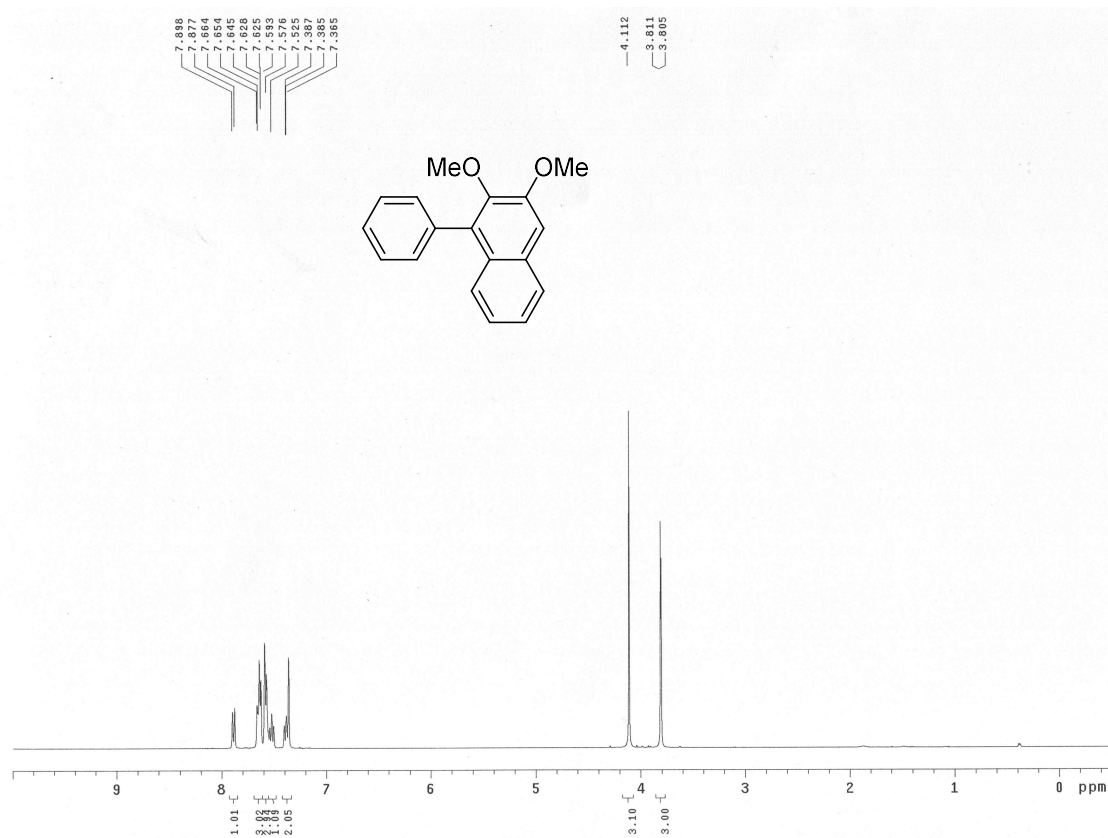

<sup>13</sup>C NMR (CDCl<sub>3</sub>, 100 MHz) spectrum of compound **5na**

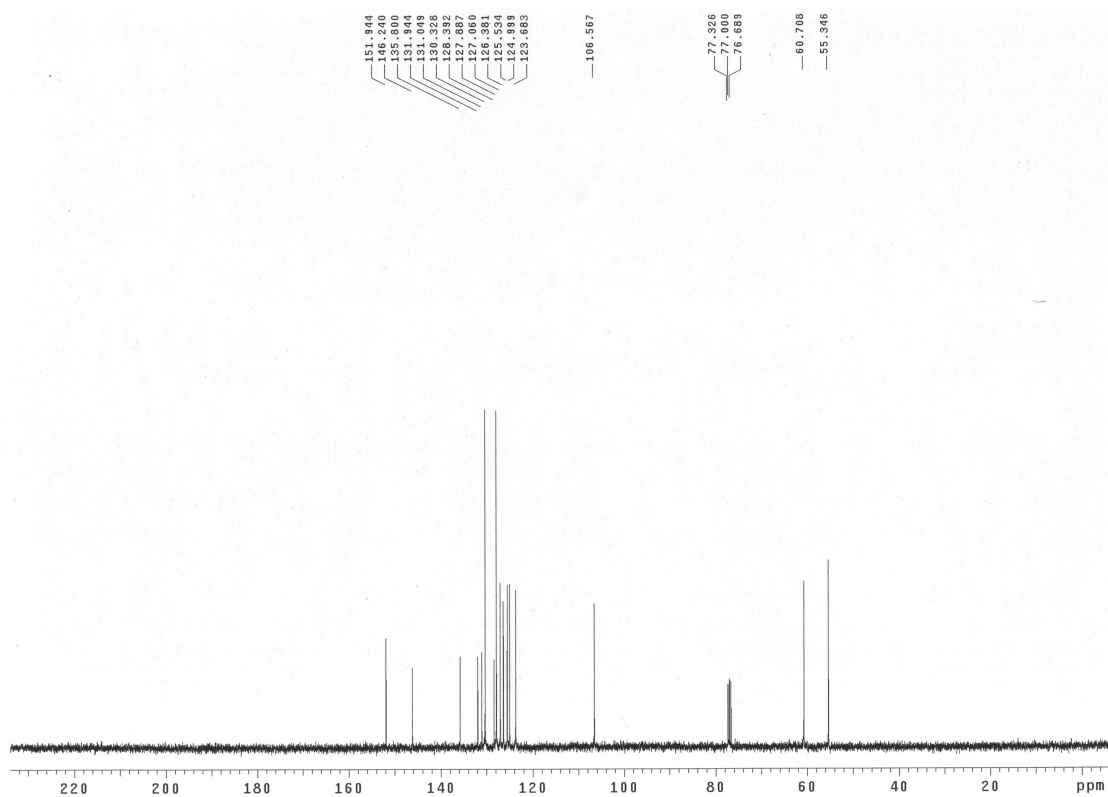

$^1\text{H}$  NMR ( $\text{CDCl}_3$ , 400 MHz) spectrum of compound **50a** (table 2, entry 21)

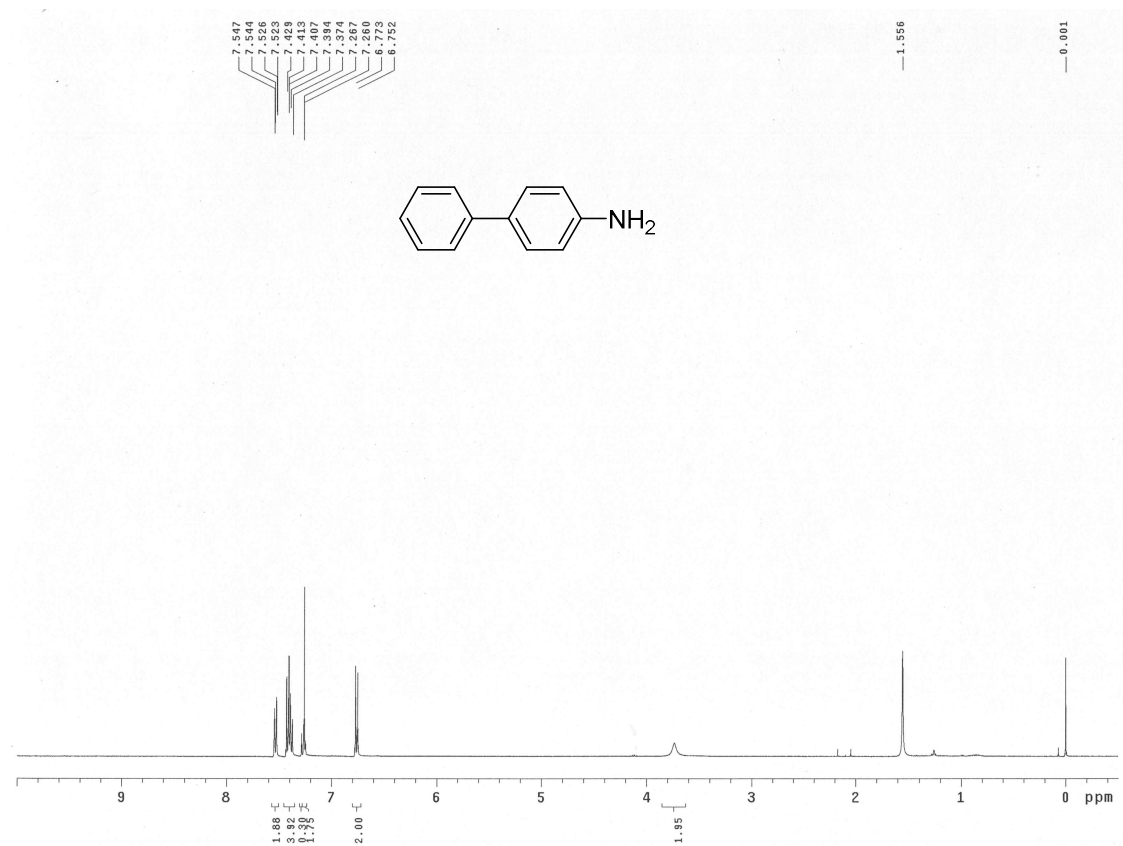

$^{13}\text{C}$  NMR ( $\text{CDCl}_3$ , 100 MHz) spectrum of compound **50a**

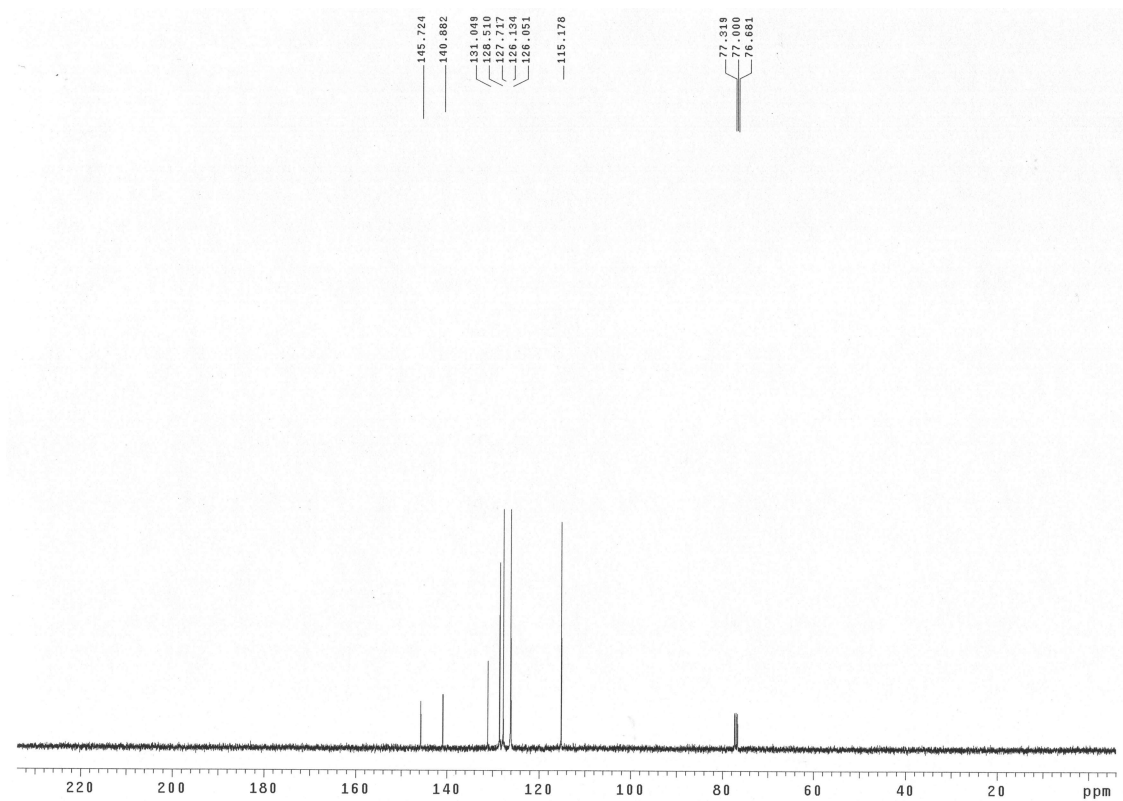

$^1\text{H}$  NMR ( $\text{CDCl}_3$ , 400 MHz) spectrum of compound **5pa** (table 2, entry 22)

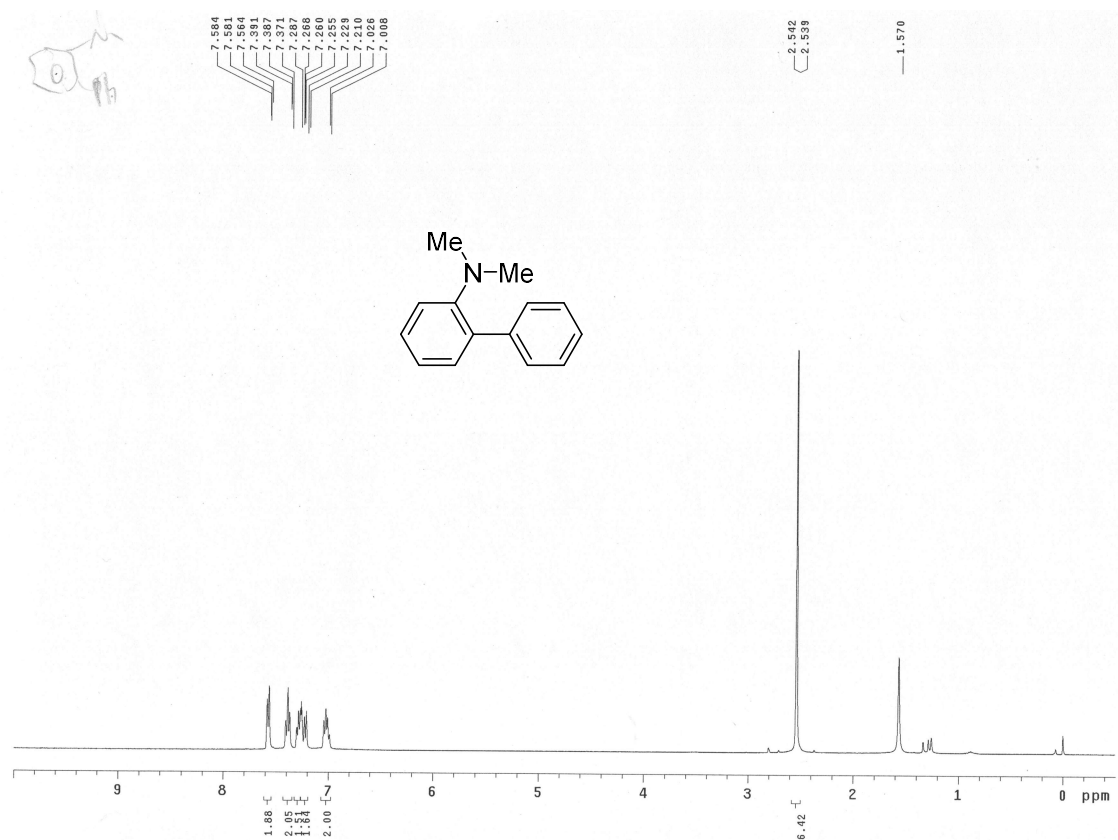

$^{13}\text{C}$  NMR ( $\text{CDCl}_3$ , 100 MHz) spectrum of compound **5pa**

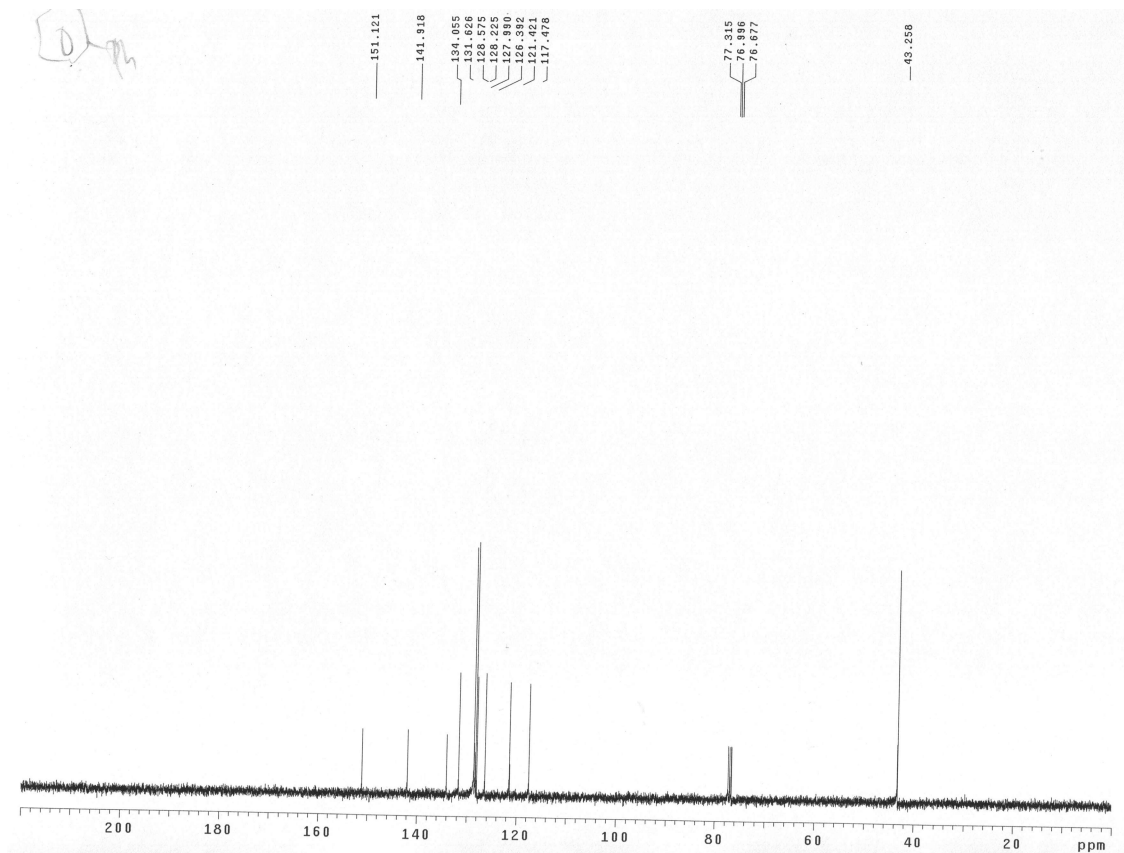

$^1\text{H}$  NMR ( $\text{CDCl}_3$ , 400 MHz) spectrum of compound **5qa** (table 2, entry 23)

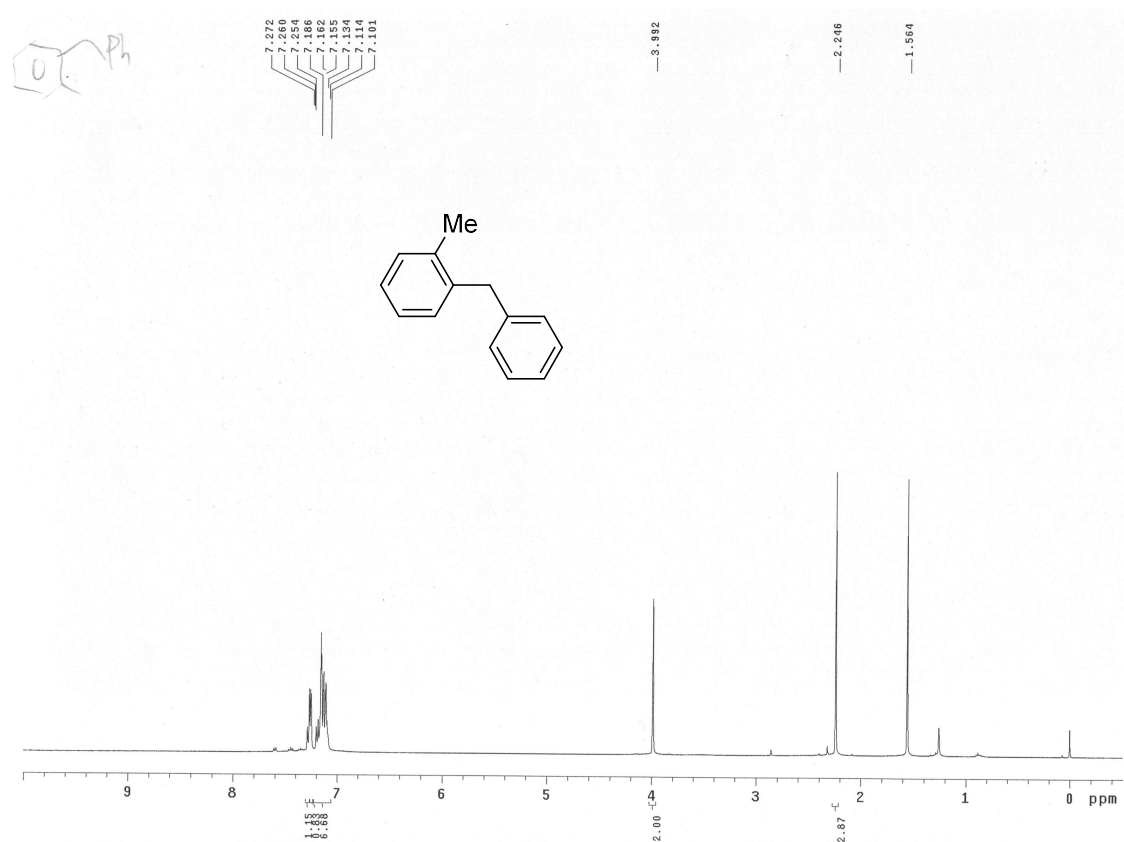

$^{13}\text{C}$  NMR ( $\text{CDCl}_3$ , 100 MHz) spectrum of compound **5qa**

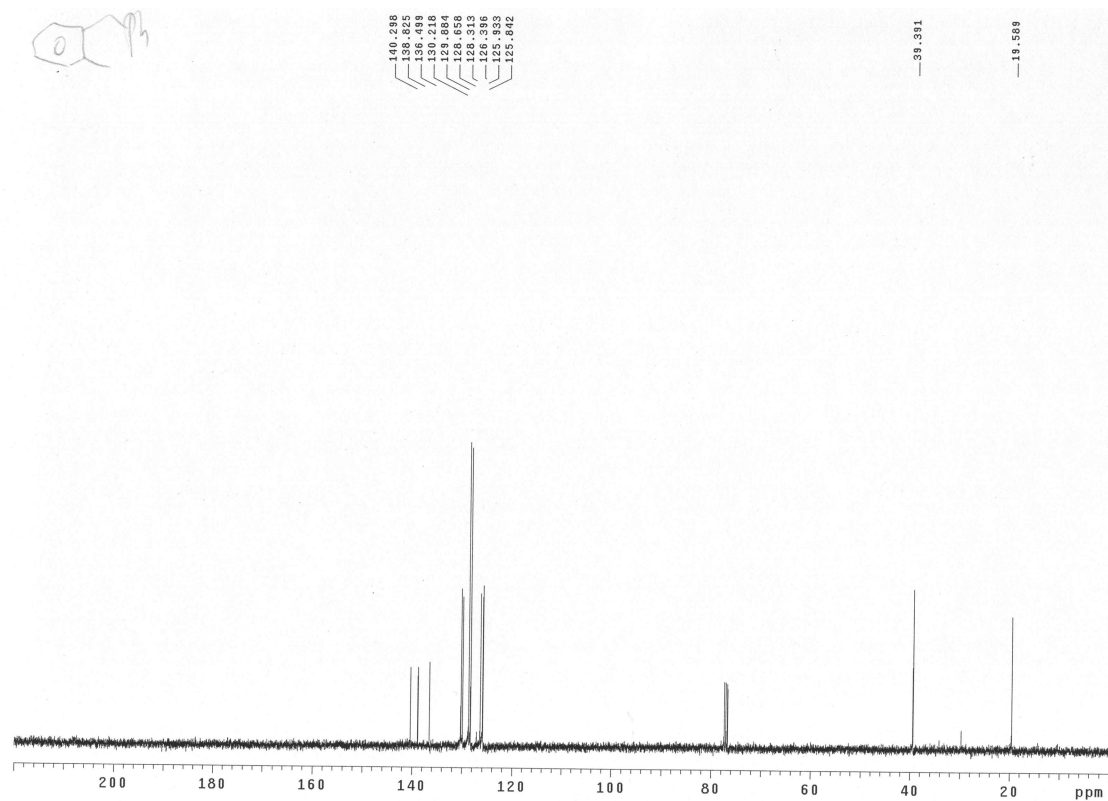

$^1\text{H}$  NMR ( $\text{CDCl}_3$ , 400 MHz) spectrum of compound **5ra** (table 2, entry 24)

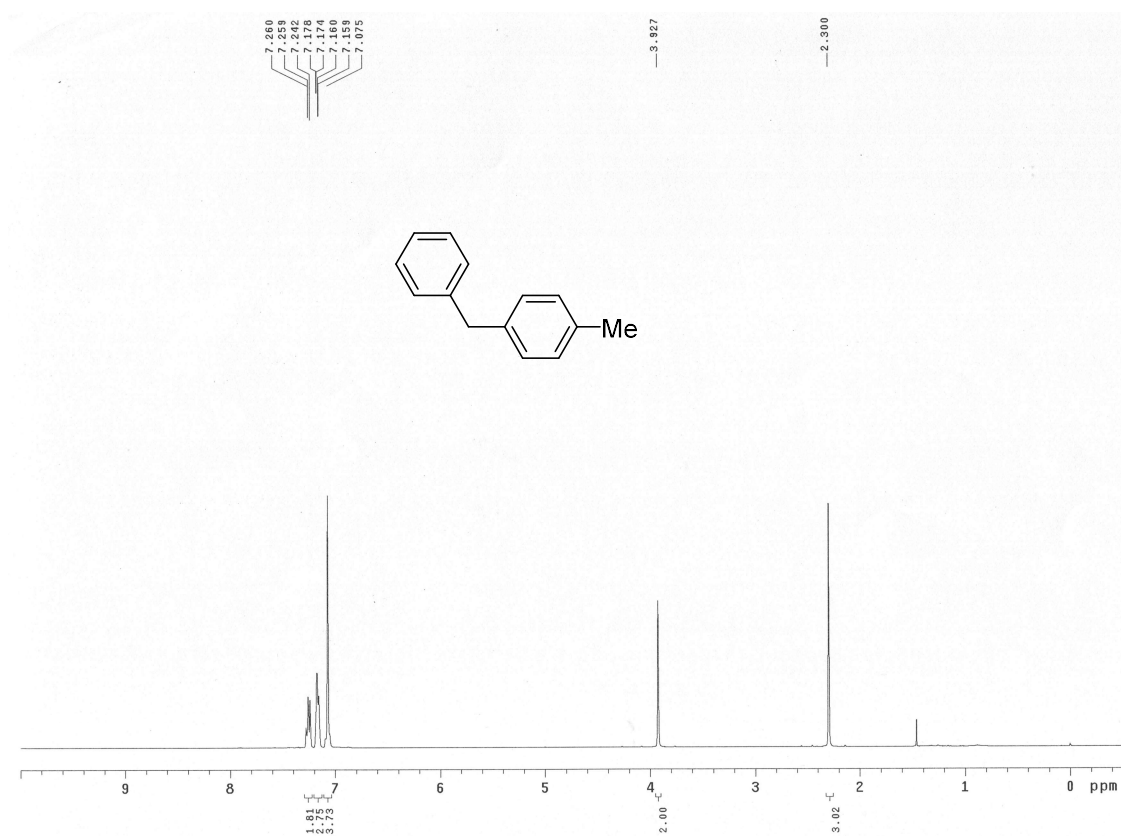

$^{13}\text{C}$  NMR ( $\text{CDCl}_3$ , 100 MHz) spectrum of compound **5ra**

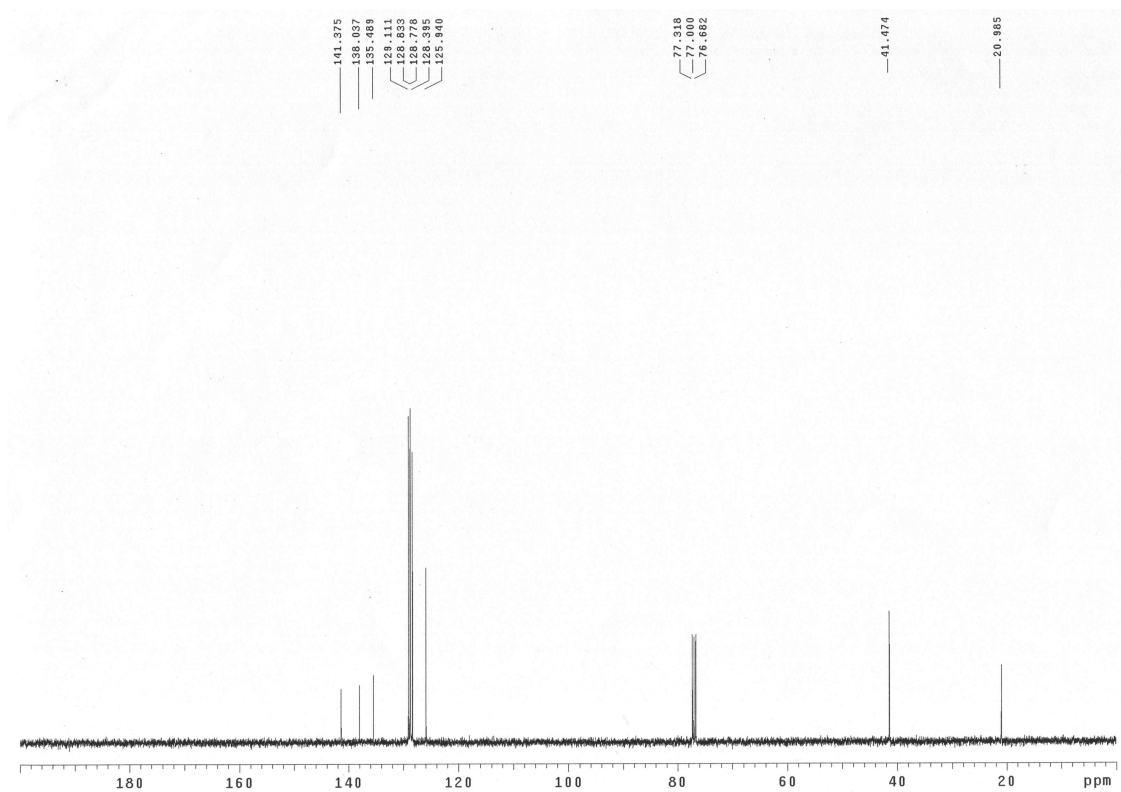

$^1\text{H}$  NMR ( $\text{CDCl}_3$ , 400 MHz) spectrum of compound **5ab** (table 2, entry 25)

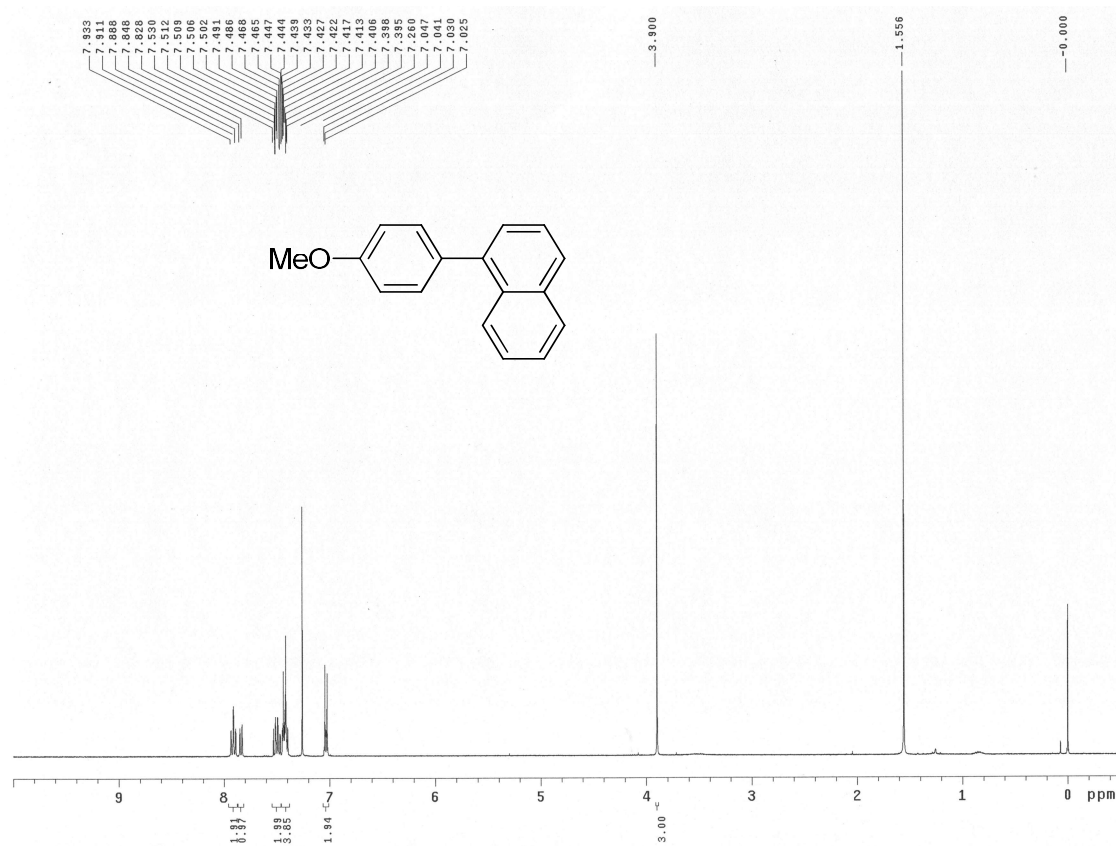

$^{13}\text{C}$  NMR ( $\text{CDCl}_3$ , 100 MHz) spectrum of compound **5ab**

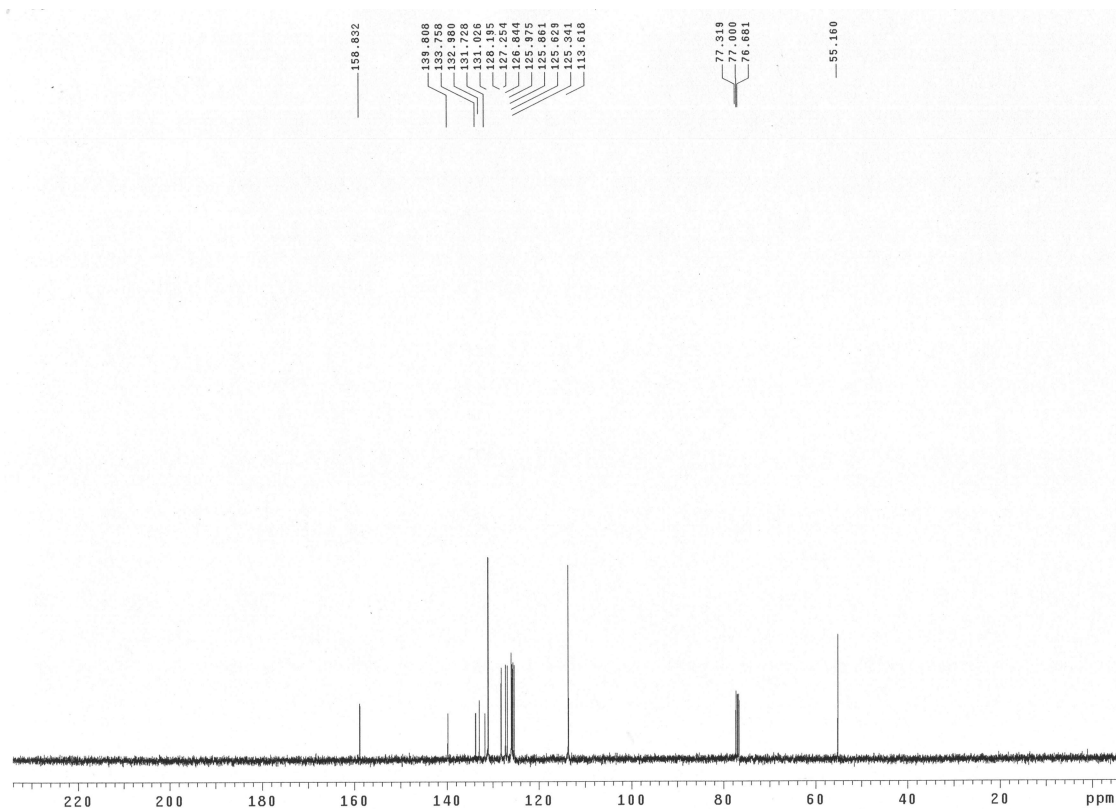



$^1\text{H}$  NMR ( $\text{CDCl}_3$ , 400 MHz) spectrum of compound **5bb** (table 2, entry 26)

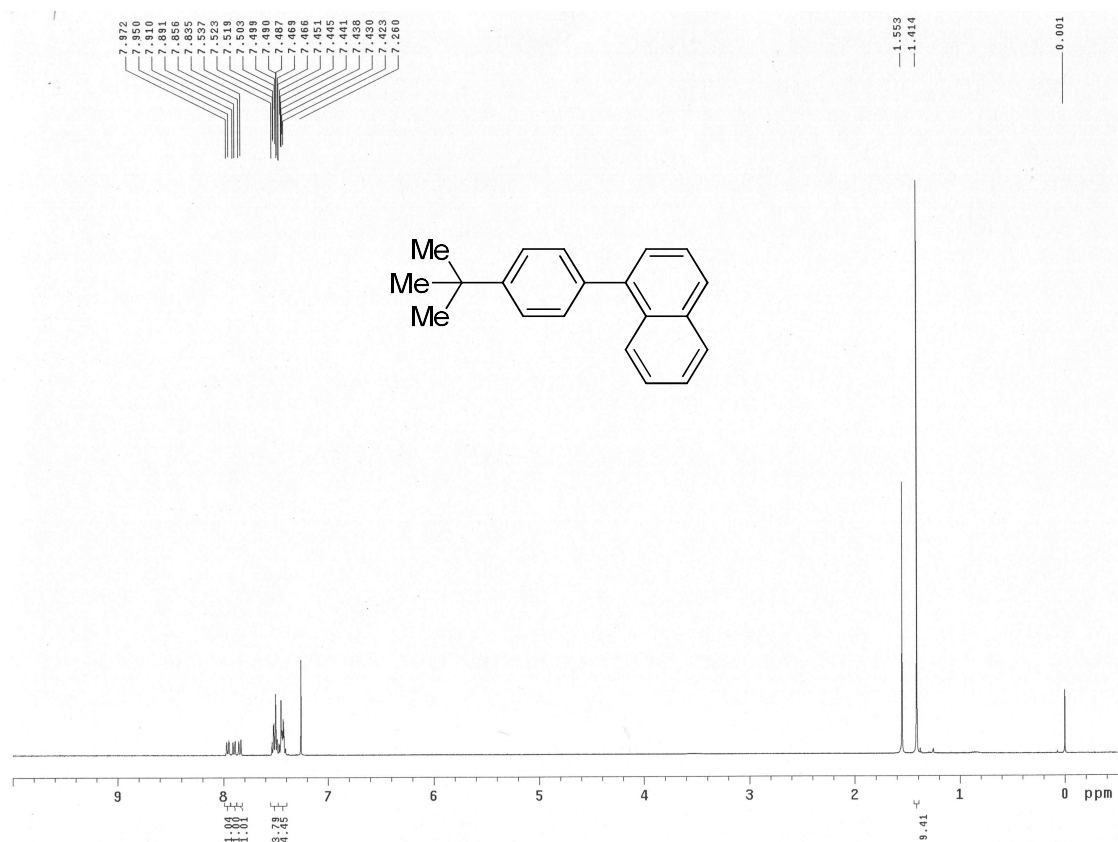

$^{13}\text{C}$  NMR ( $\text{CDCl}_3$ , 100 MHz) spectrum of compound **5bb**

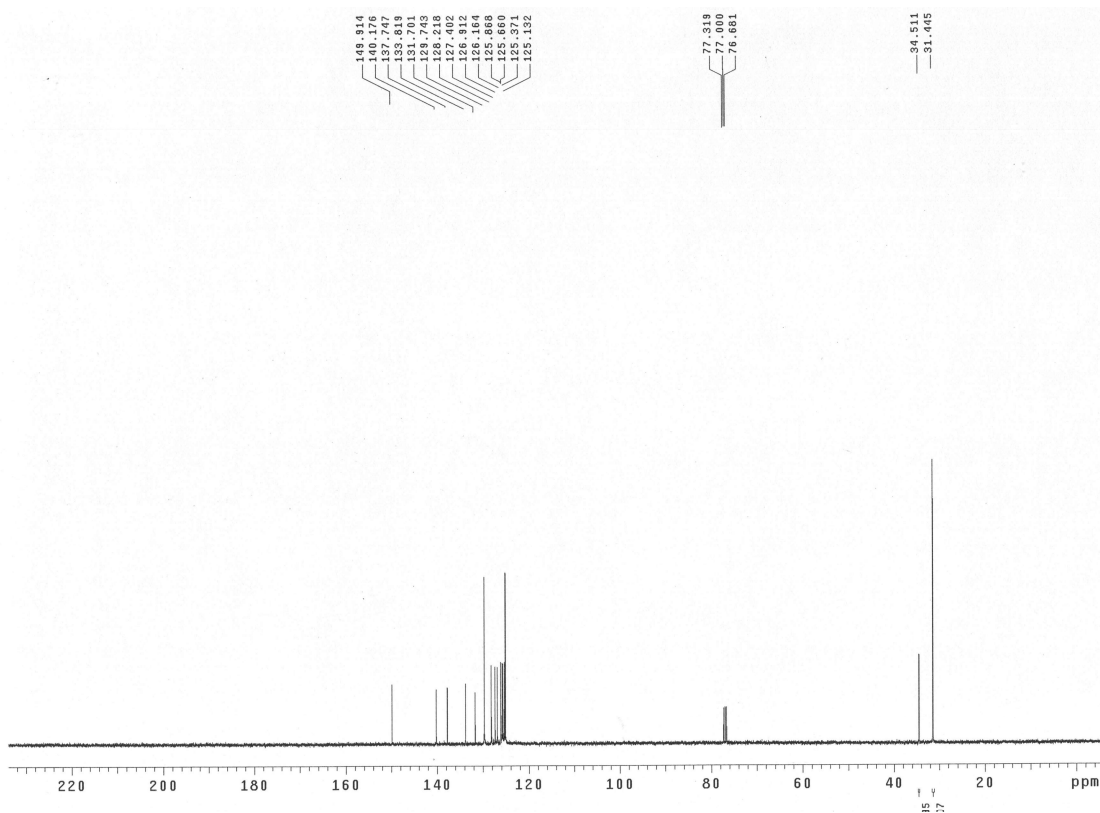



$^1\text{H}$  NMR ( $\text{CDCl}_3$ , 400 MHz) spectrum of compound **5cb** (table 2, entry 27)

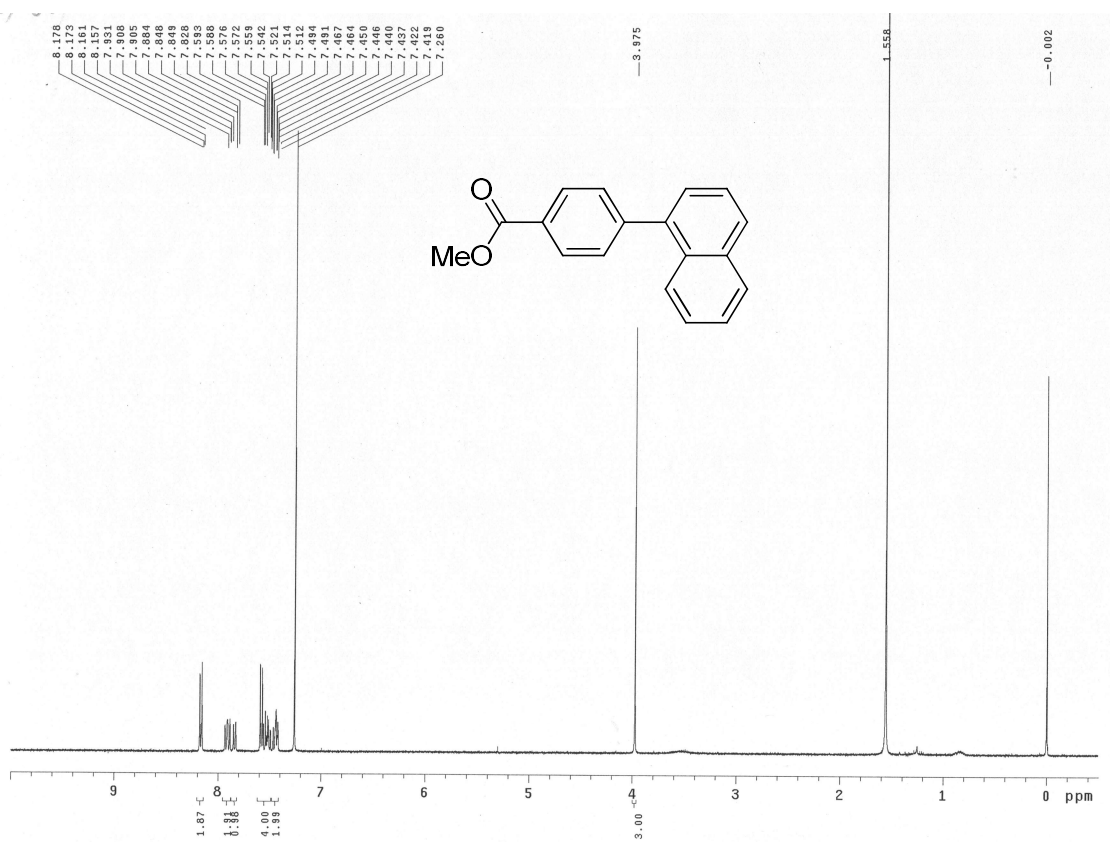

$^{13}\text{C}$  NMR ( $\text{CDCl}_3$ , 100 MHz) spectrum of compound **5cb**

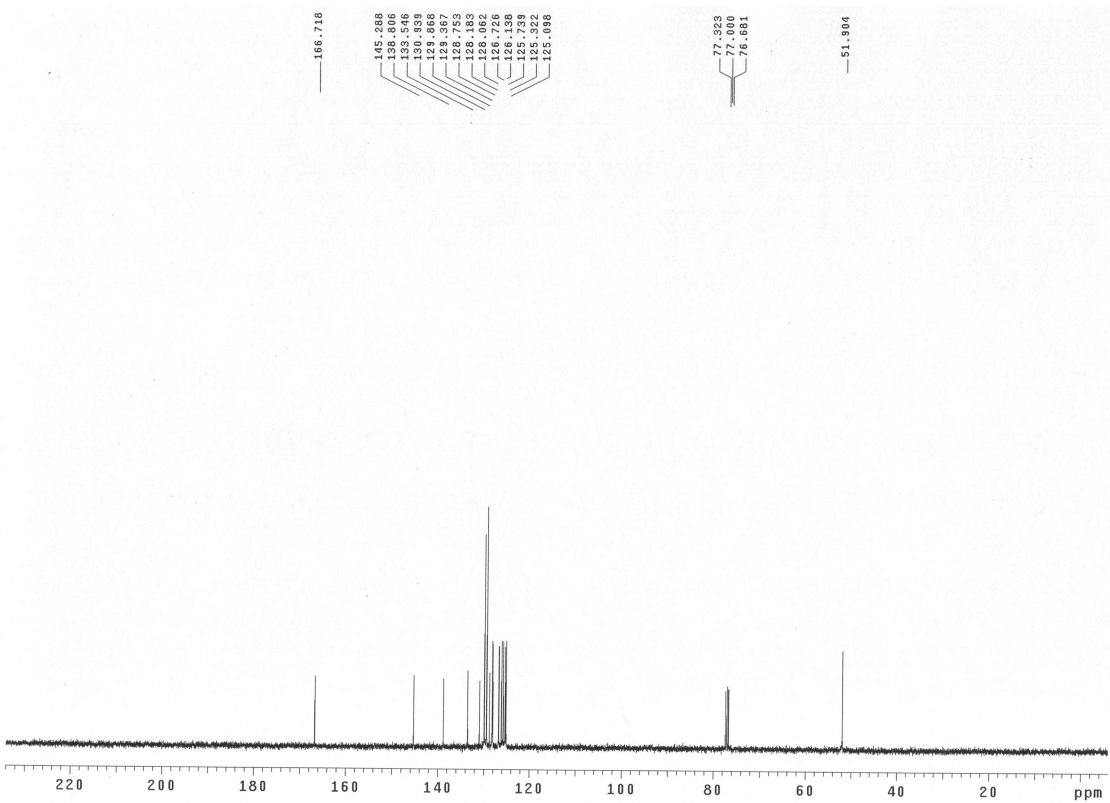

$^1\text{H}$  NMR ( $\text{CDCl}_3$ , 400 MHz) spectrum of compound **5db** (table 2, entry 28)

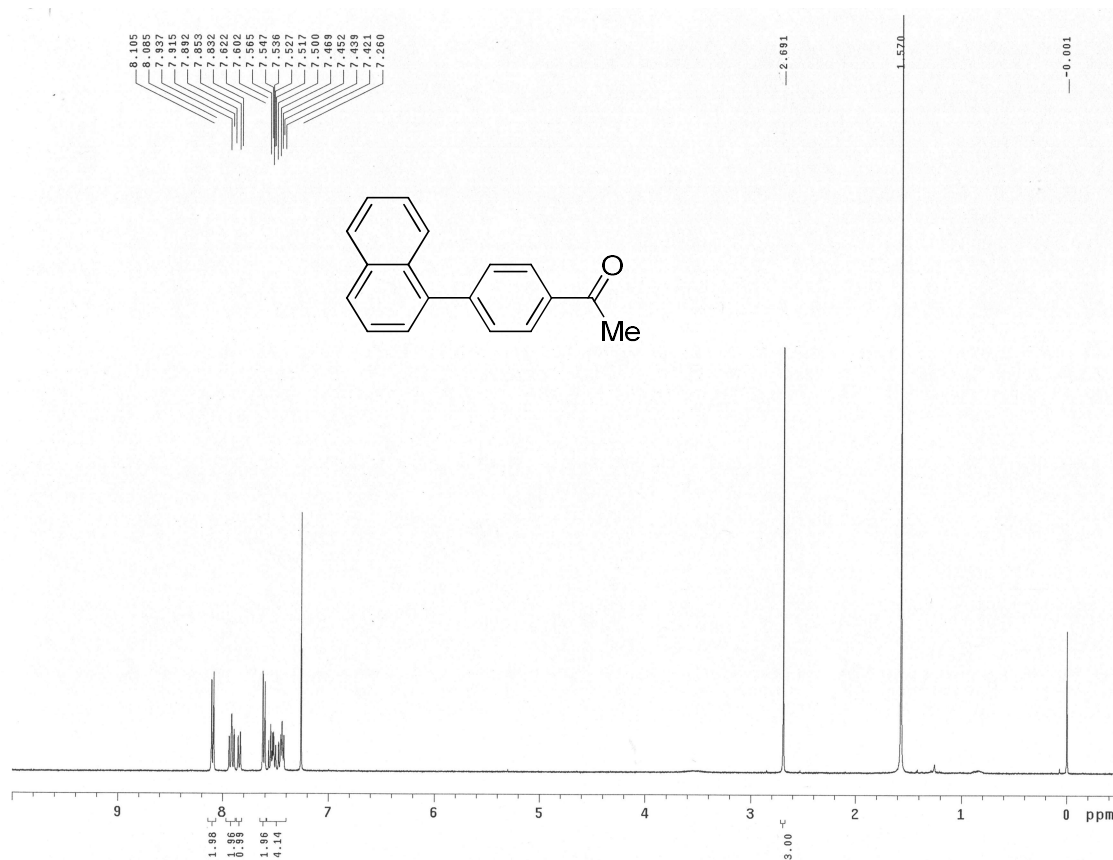

$^{13}\text{C}$  NMR ( $\text{CDCl}_3$ , 100 MHz) spectrum of compound **5db**

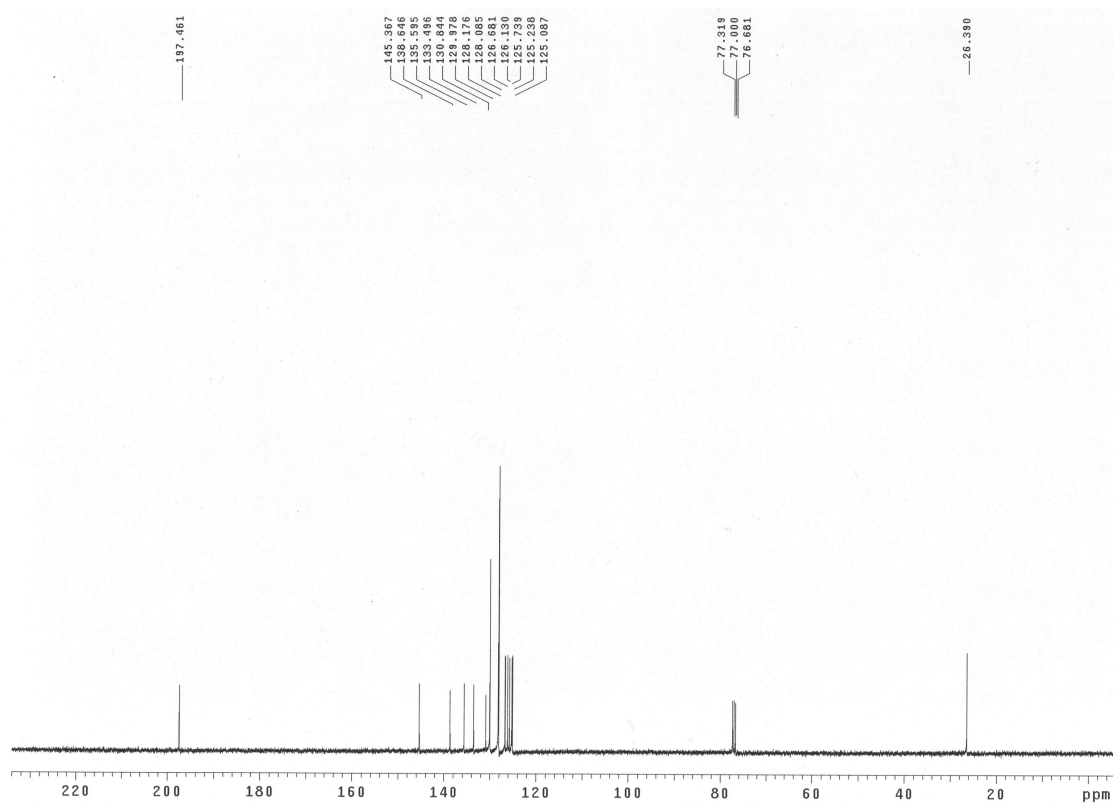

$^1\text{H}$  NMR ( $\text{CDCl}_3$ , 400 MHz) spectrum of compound **5eb** (table 2, entry 29)

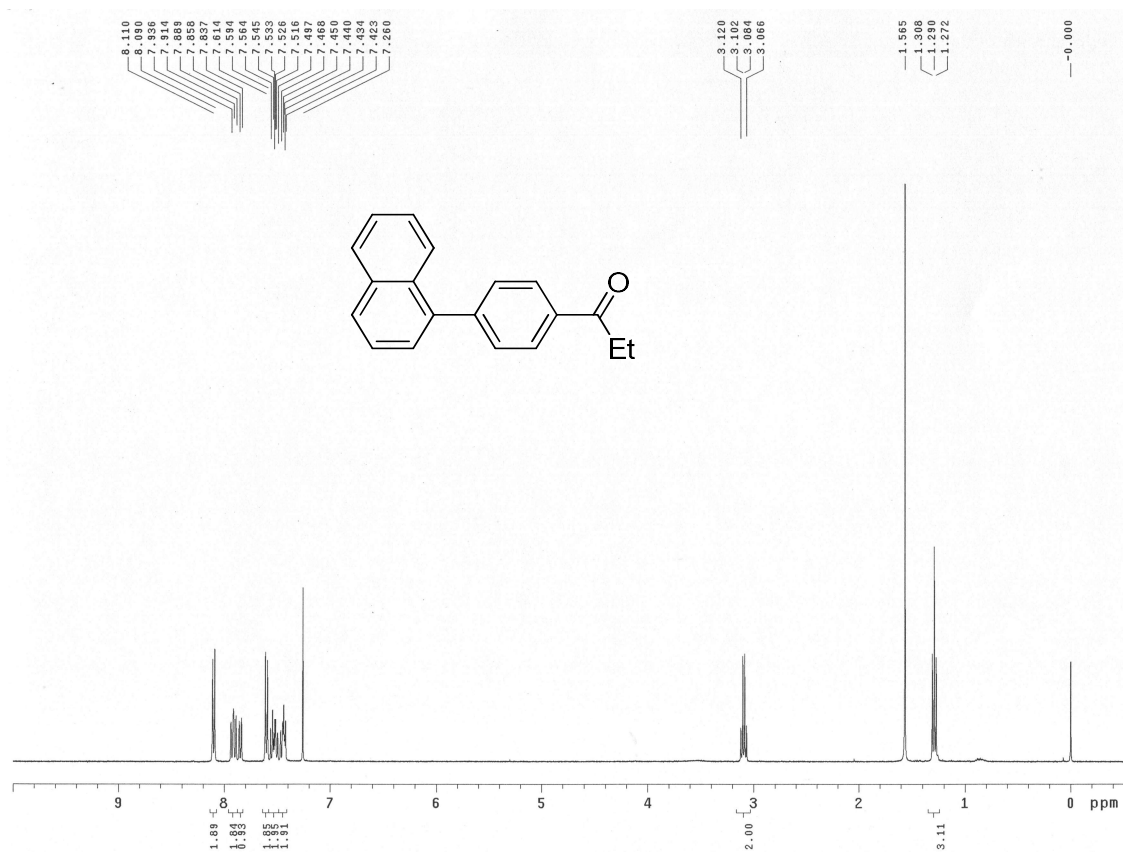

$^{13}\text{C}$  NMR ( $\text{CDCl}_3$ , 100 MHz) spectrum of compound **5eb**

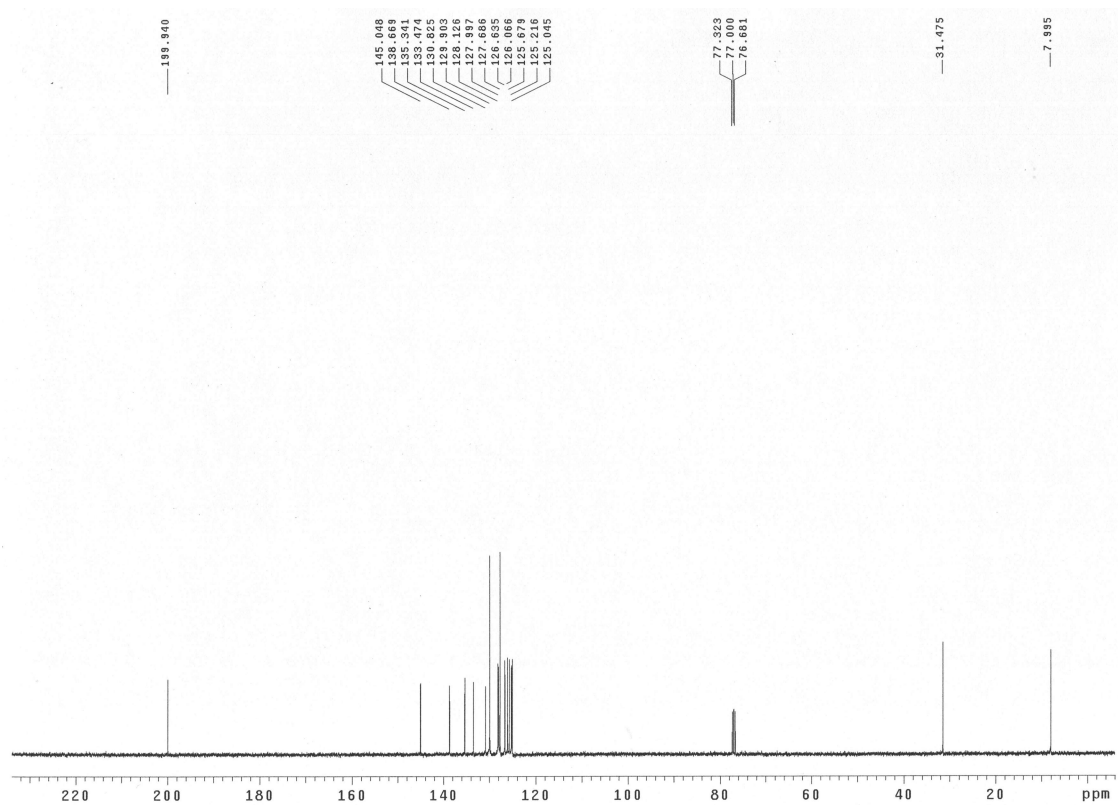

$^1\text{H}$  NMR ( $\text{CDCl}_3$ , 400 MHz) spectrum of compound **5fb** (table 2, entry 30)

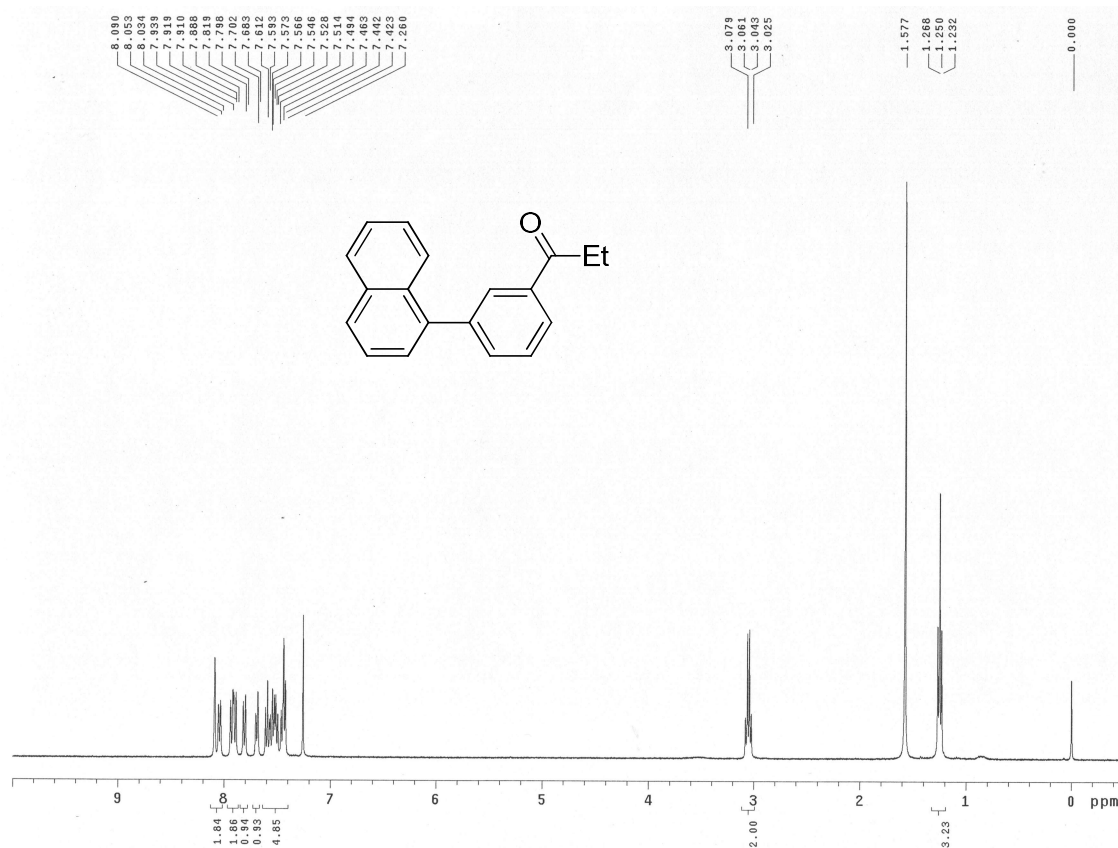

$^{13}\text{C}$  NMR ( $\text{CDCl}_3$ , 100 MHz) spectrum of compound **5fb**

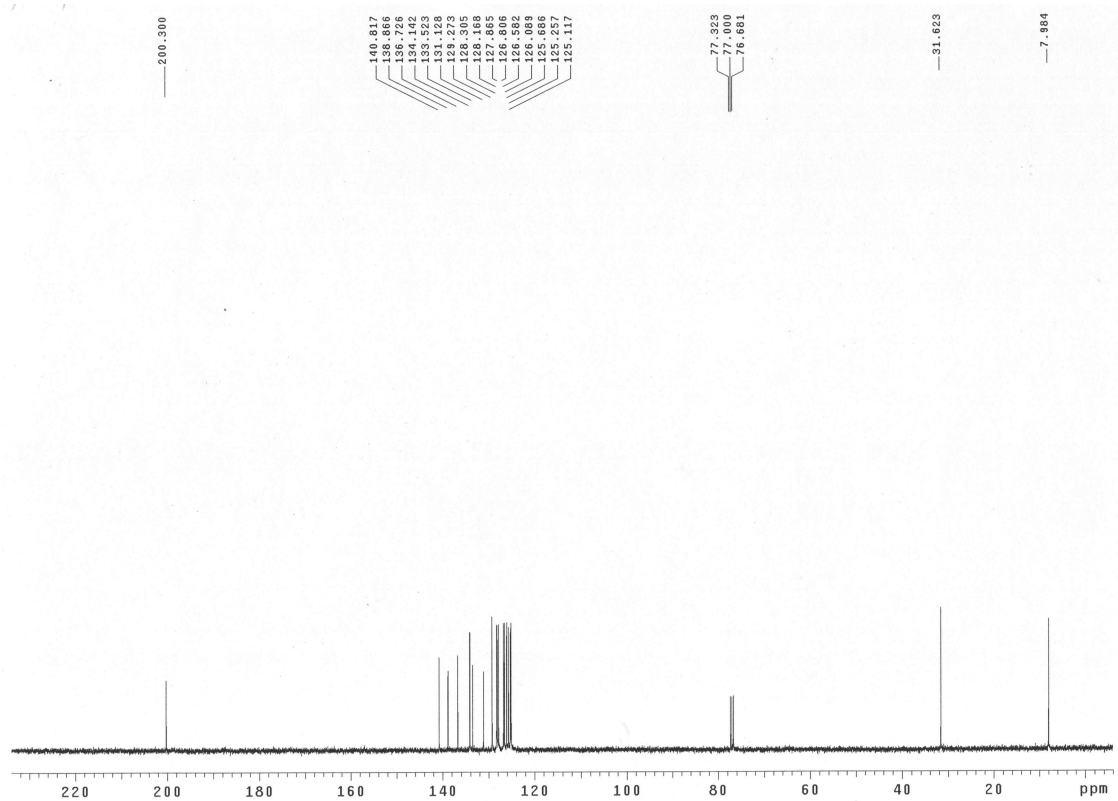

$^1\text{H}$  NMR ( $\text{CDCl}_3$ , 400 MHz) spectrum of compound **5ob** (table 2, entry 31)

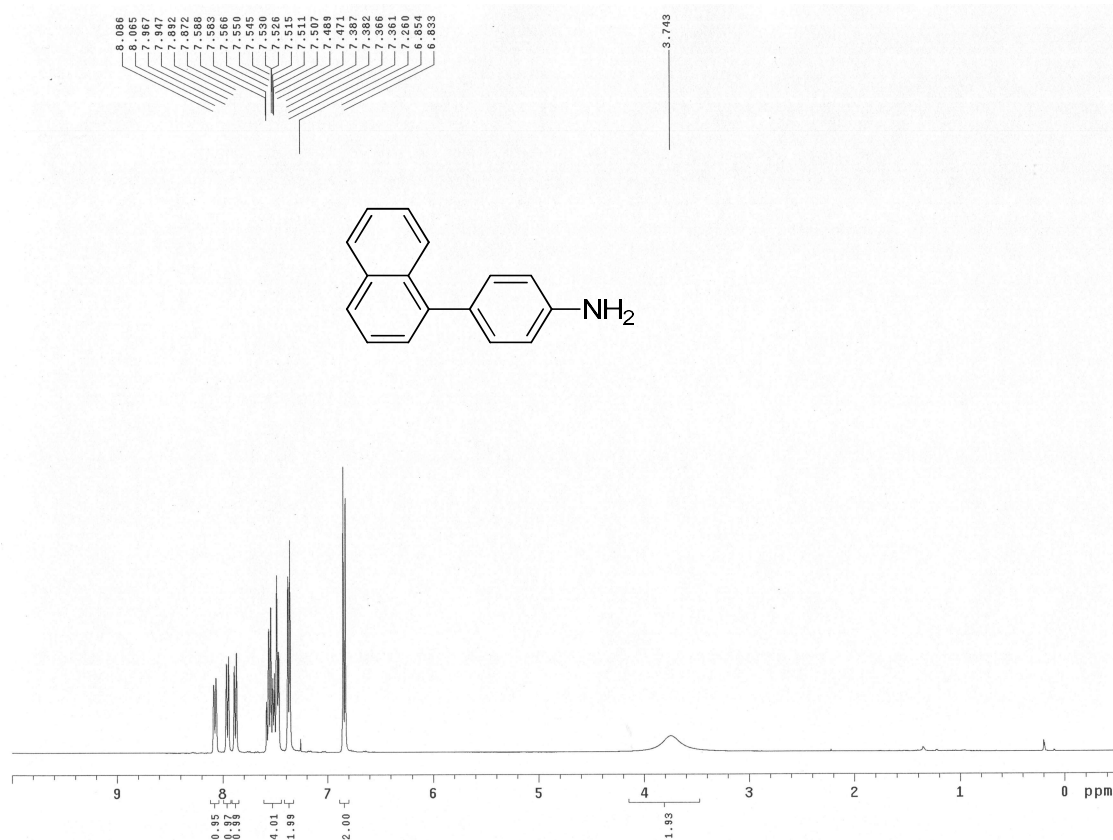

$^{13}\text{C}$  NMR ( $\text{CDCl}_3$ , 100 MHz) spectrum of compound **5ob**

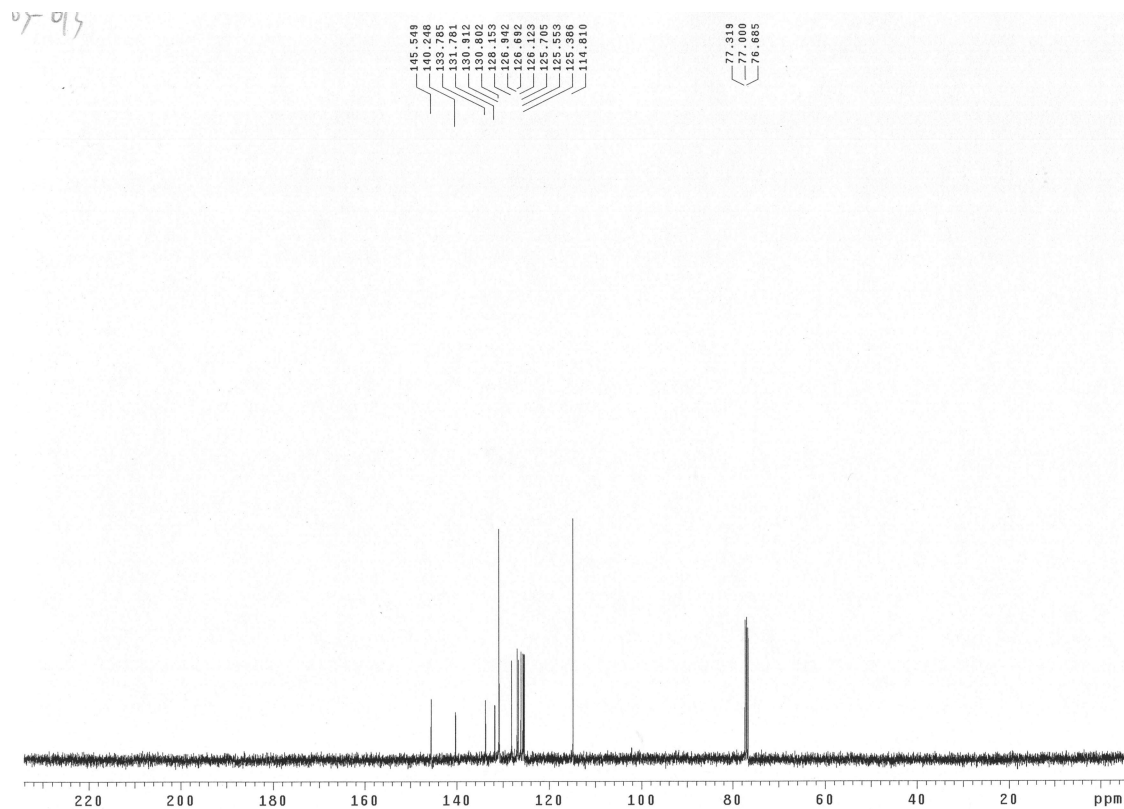

<sup>1</sup>H NMR (CDCl<sub>3</sub>, 400 MHz) spectrum of compound **7da** (table 4, entry 1)

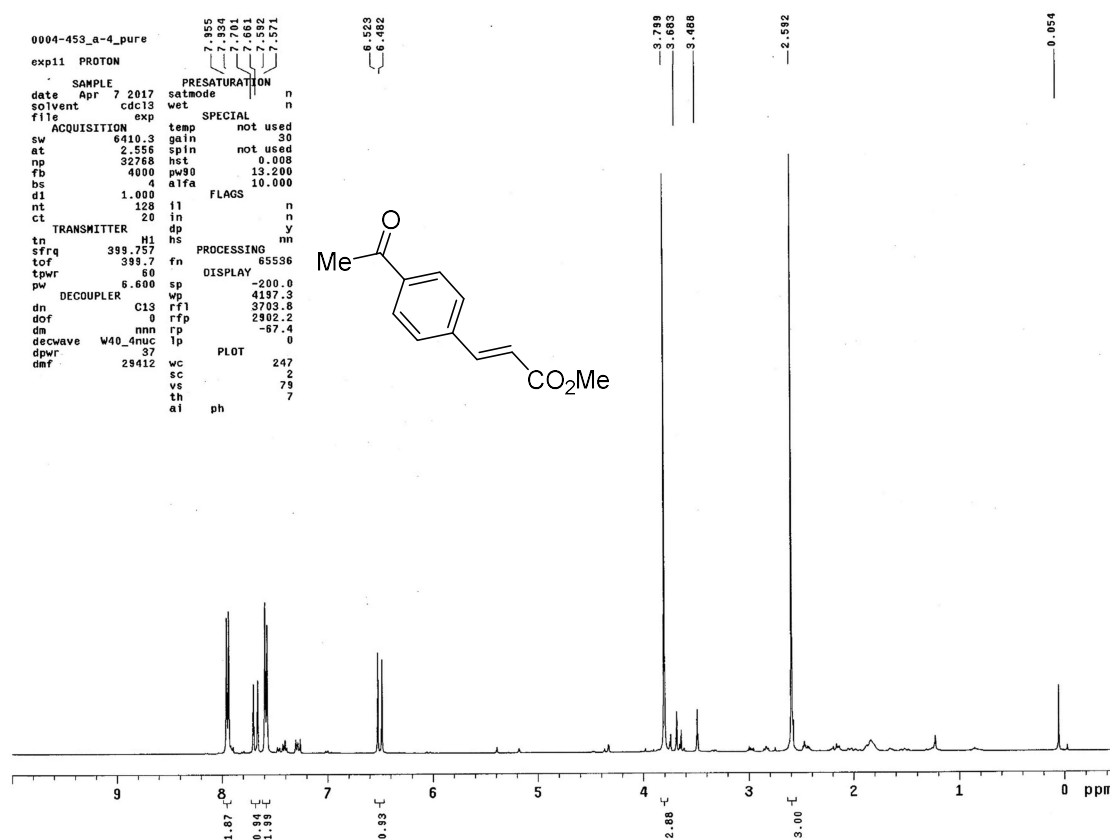

<sup>13</sup>C NMR (CDCl<sub>3</sub>, 100 MHz) spectrum of compound **7da**

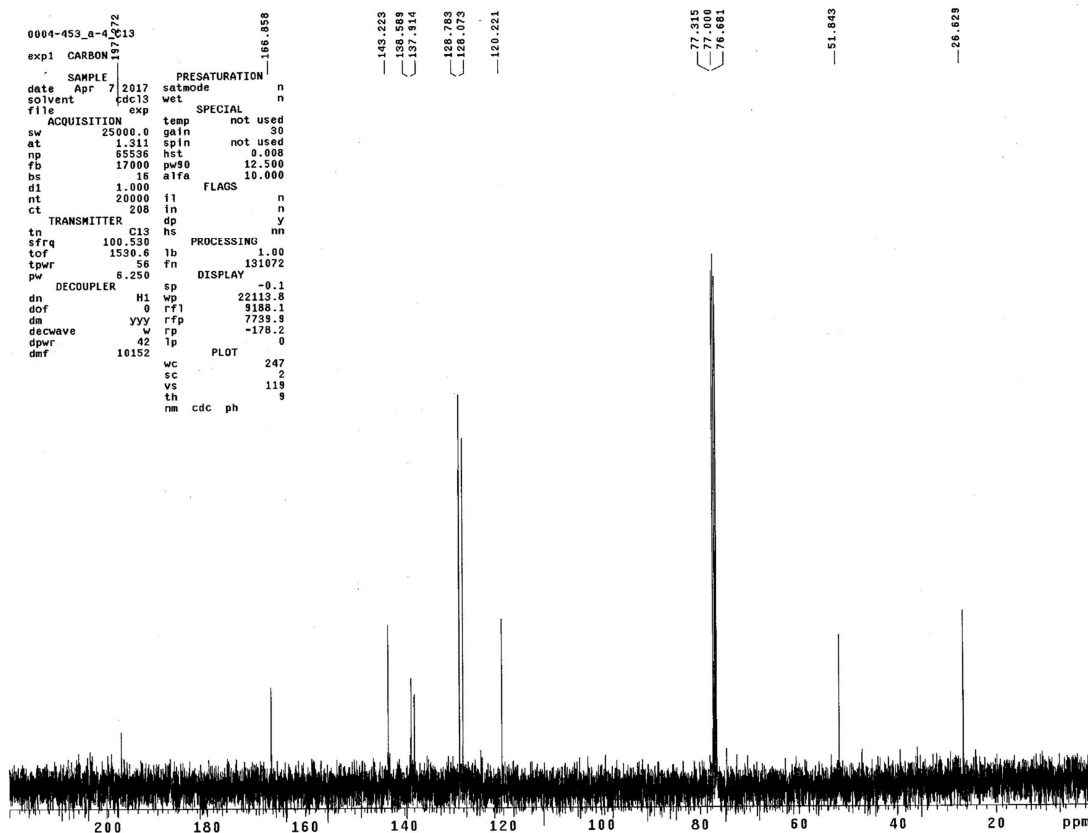

$^1\text{H}$  NMR ( $\text{CDCl}_3$ , 400 MHz) spectrum of compound **7eb** (table 4, entry 2)

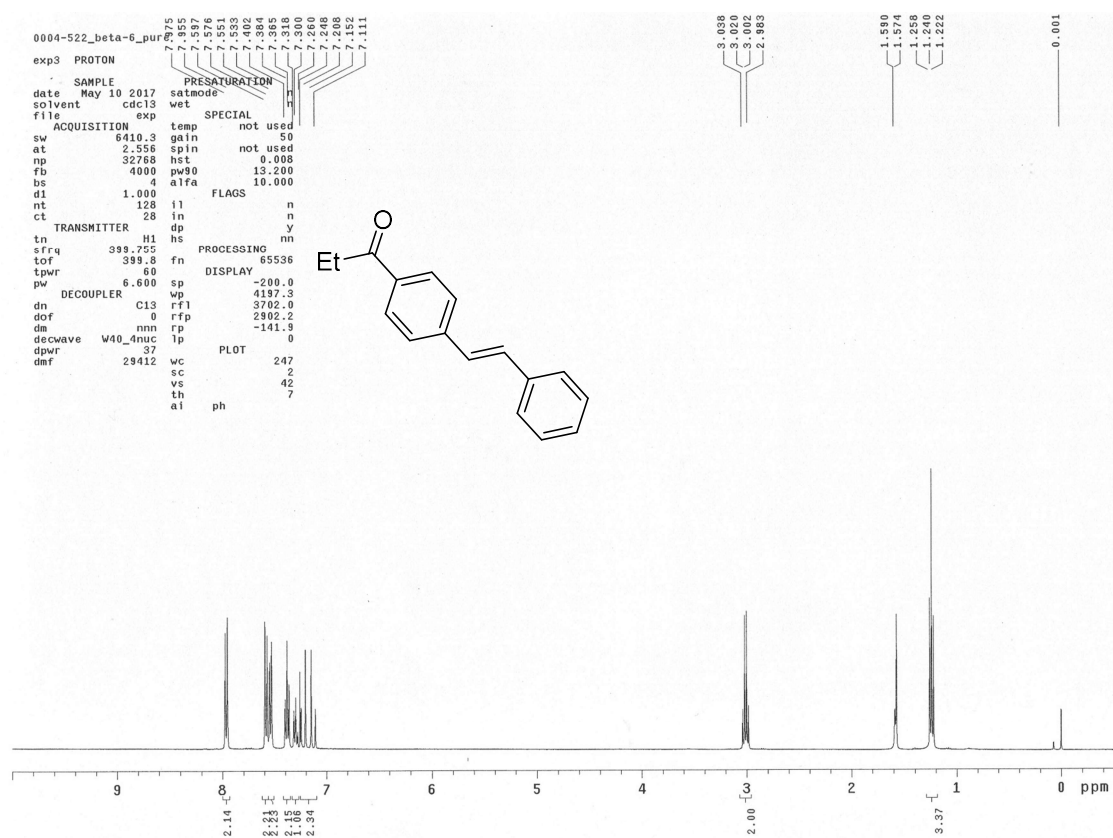

$^{13}\text{C}$  NMR ( $\text{CDCl}_3$ , 100 MHz) spectrum of compound **7eb**

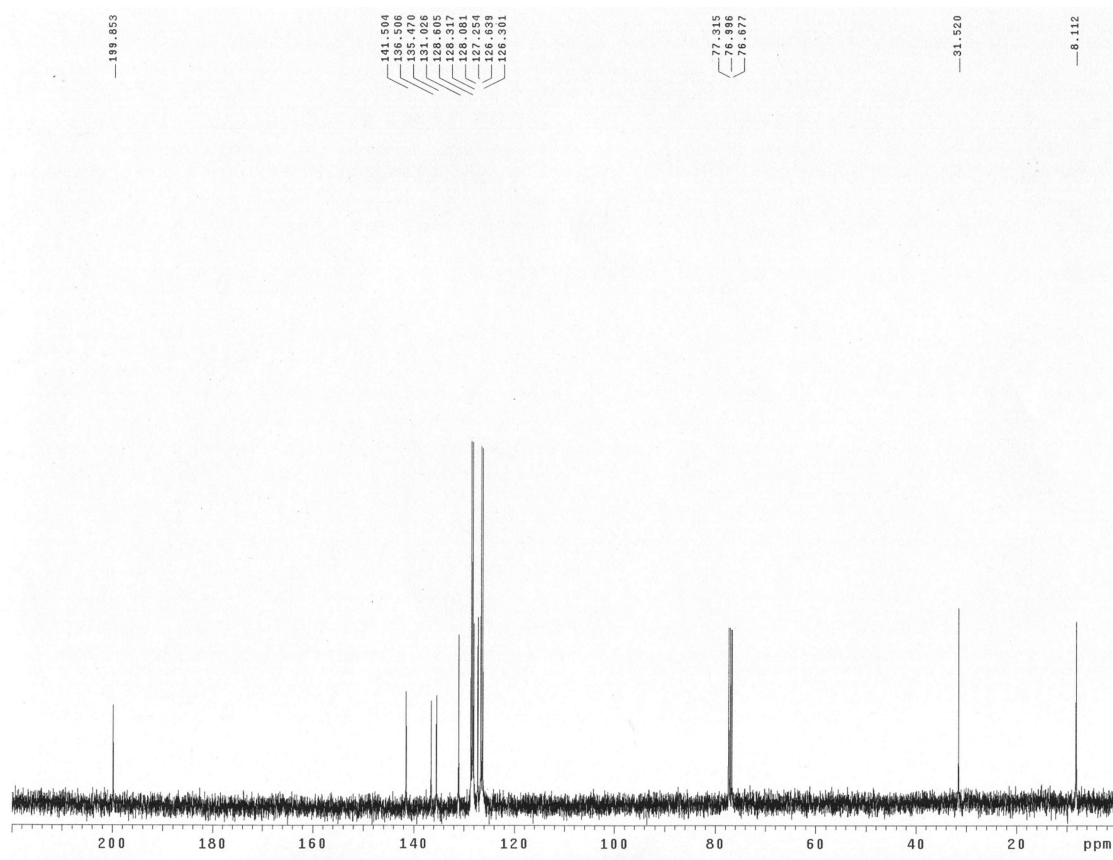



000M528\_delta-6\_pure  
 exp1 PROTON

| SAMPLE  |            | PRESATURATION |          |
|---------|------------|---------------|----------|
| date    | May 7 2017 | satmode       | n        |
| solvent | cdcl3      | wet           | n        |
| file    | exp        | SPECIAL       | not used |

| ACQUISITION |        | temp  |          |
|-------------|--------|-------|----------|
| sv          | 6410.3 | gain  | 50       |
| at          | 2.556  | spin  | not used |
| np          | 32768  | inst  | 0.008    |
| fb          | 4000   | pw90  | 13.200   |
| bs          | 4      | alfa  | 10.000   |
| d1          | 1.000  | FLAGS |          |

| TRANSMITTER |          | PROCESSING |        |
|-------------|----------|------------|--------|
| tn          | 128      | f1         | n      |
| ct          | 16       | in         | n      |
|             |          | dp         | y      |
|             |          | hs         | nm     |
| tn          | 399.755  | fn         | 65536  |
| tof         | 399.8    |            |        |
| tpwr        | 60       | DISPLAY    |        |
| pw          | 6.600    | ep         | -200.0 |
|             |          | wp         | 4397.3 |
| dn          | C13      | rf1        | 3702.8 |
| dof         | 0        | rfp        | 2902.2 |
| dn          | nmn      | rp         | 122.6  |
| decave      | W40_4nuc | lp         | 0      |
| dpwr        | 37       | PLOT       |        |
| dmf         | 29412    | vc         | 247    |
|             |          | sc         | 2      |
|             |          | vs         | 90     |
|             |          | th         | 7      |
|             |          | ph         |        |

7.684  
 7.685  
 7.689  
 7.690  
 7.691  
 7.692  
 7.693  
 7.694  
 7.695  
 7.696  
 7.697  
 7.698  
 7.699  
 7.700  
 7.701  
 7.702  
 7.703  
 7.704  
 7.705  
 7.706  
 7.707  
 7.708  
 7.709  
 7.710  
 7.711  
 7.712  
 7.713  
 7.714  
 7.715  
 7.716  
 7.717  
 7.718  
 7.719  
 7.720  
 7.721  
 7.722  
 7.723  
 7.724  
 7.725  
 7.726  
 7.727  
 7.728  
 7.729  
 7.730  
 7.731  
 7.732  
 7.733  
 7.734  
 7.735  
 7.736  
 7.737  
 7.738  
 7.739  
 7.740  
 7.741  
 7.742  
 7.743  
 7.744  
 7.745  
 7.746  
 7.747  
 7.748  
 7.749  
 7.750  
 7.751  
 7.752  
 7.753  
 7.754  
 7.755  
 7.756  
 7.757  
 7.758  
 7.759  
 7.760  
 7.761  
 7.762  
 7.763  
 7.764  
 7.765  
 7.766  
 7.767  
 7.768  
 7.769  
 7.770  
 7.771  
 7.772  
 7.773  
 7.774  
 7.775  
 7.776  
 7.777  
 7.778  
 7.779  
 7.780  
 7.781  
 7.782  
 7.783  
 7.784  
 7.785  
 7.786  
 7.787  
 7.788  
 7.789  
 7.790  
 7.791  
 7.792  
 7.793  
 7.794  
 7.795  
 7.796  
 7.797  
 7.798  
 7.799  
 7.800  
 7.801  
 7.802  
 7.803  
 7.804  
 7.805  
 7.806  
 7.807  
 7.808  
 7.809  
 7.810  
 7.811  
 7.812  
 7.813  
 7.814  
 7.815  
 7.816  
 7.817  
 7.818  
 7.819  
 7.820  
 7.821  
 7.822  
 7.823  
 7.824  
 7.825  
 7.826  
 7.827  
 7.828  
 7.829  
 7.830  
 7.831  
 7.832  
 7.833  
 7.834  
 7.835  
 7.836  
 7.837  
 7.838  
 7.839  
 7.840  
 7.841  
 7.842  
 7.843  
 7.844  
 7.845  
 7.846  
 7.847  
 7.848  
 7.849  
 7.850  
 7.851  
 7.852  
 7.853  
 7.854  
 7.855  
 7.856  
 7.857  
 7.858  
 7.859  
 7.860  
 7.861  
 7.862  
 7.863  
 7.864  
 7.865  
 7.866  
 7.867  
 7.868  
 7.869  
 7.870  
 7.871  
 7.872  
 7.873  
 7.874  
 7.875  
 7.876  
 7.877  
 7.878  
 7.879  
 7.880  
 7.881  
 7.882  
 7.883  
 7.884  
 7.885  
 7.886  
 7.887  
 7.888  
 7.889  
 7.890  
 7.891  
 7.892  
 7.893  
 7.894  
 7.895  
 7.896  
 7.897  
 7.898  
 7.899  
 7.900  
 7.901  
 7.902  
 7.903  
 7.904  
 7.905  
 7.906  
 7.907  
 7.908  
 7.909  
 7.910  
 7.911  
 7.912  
 7.913  
 7.914  
 7.915  
 7.916  
 7.917  
 7.918  
 7.919  
 7.920  
 7.921  
 7.922  
 7.923  
 7.924  
 7.925  
 7.926  
 7.927  
 7.928  
 7.929  
 7.930  
 7.931  
 7.932  
 7.933  
 7.934  
 7.935  
 7.936  
 7.937  
 7.938  
 7.939  
 7.940  
 7.941  
 7.942  
 7.943  
 7.944  
 7.945  
 7.946  
 7.947  
 7.948  
 7.949  
 7.950  
 7.951  
 7.952  
 7.953  
 7.954  
 7.955  
 7.956  
 7.957  
 7.958  
 7.959  
 7.960  
 7.961  
 7.962  
 7.963  
 7.964  
 7.965  
 7.966  
 7.967  
 7.968  
 7

13C NMR spectrum of compound 10. The x-axis represents chemical shift in ppm, ranging from 0 to 200. The spectrum shows several peaks, with the following chemical shifts labeled above the corresponding peaks:

- 191.474
- 143.212
- 136.366
- 135.136
- 134.624
- 130.975
- 128.686
- 128.370
- 127.136
- 126.700
- 125.749
- 77.319
- 77.000
- 76.691



0009-567\_b-d\_pure  
S  
exp2 PROTON

SAMPLE date May 7 2017 solvent cdc13 file exp  
PRESATURATION satmode wet n  
SPECIAL temp not used gain 58 spin not used hst 0.008 pw90 13.200 alfa 10.000  
ACQUISITION d1 1.000 nt 128 ct 24  
TRANSMITTER H1 HI HS  
tn sFrf 399.755 tof 399.8 fn  
tpwr 60 pw 6.600  
DECOUPLER C13 C13 rf1  
dn dof 0 rfp  
dm nnn rp 125.9  
decwave W40\_4muc lp  
dpwr 37 PL0T  
dmf 29412 wc 247 sc 2 vs 30 th 7 a1 ph

8.418  
7.928  
7.907  
7.881  
7.872  
7.851  
7.802

—1.564 —0.000

H

O=Cc1ccc(/C=C/c2cc([N+](=O)[O-])cc2)cc1

Chemical shifts (ppm) labeled on the right side of the spectrum:

- 191.489
- 148.677
- 142.112
- 138.266
- 135.76
- 135.56
- 130.286
- 130.237
- 129.725
- 129.349
- 127.144
- 122.794
- 121.152
- 77.319
- 77.000
- 76.661

00042462\_d-4\_pure  
exp12 PROTON

SAMPLE PRESATURATION  
date Apr 7 2017 satmode n  
solvent cdc13 wet n  
file exp SPECIAL

ACQUISITION temp not used  
sw 640.3 gain 18  
at 2.556 spin not used  
np 32768 hst 0.008  
fb 4000 pw90 13.200  
bs 4 alfa 10.000  
d1 1.000  
nt 128 f1 n  
ct 24 in n

TRANSMITTER  
tn H1 hs nn  
sfrq 399.757  
tof 399.7 fn PROCESSING 65536  
tpwr 60 DISPLAY  
pw 6.600 sp -200.0  
DECOUPLER C13 rf1 4397.3  
dn 0 rfp 3703.4  
dof 0 rfp 2902.2  
dm nnn rp -64.9  
decwave W40\_4nuc lp 0  
dpwr 37 PLOT  
dmf 29412 wc 247  
sc 2  
vs 142  
th 7  
al ph

7.833  
7.812  
7.806  
7.805  
7.803  
6.499  
6.493  
6.483  
6.453  
6.453  
6.453  
3.748

1.00  
2.18  
2.81  
1.03  
3.40

10 9 8 7 6 5 4 3 2 1 0 ppm

Chemical structure: CCOC(=O)/C=C/c1ccc(C=O)cc1

0004-462\_d-4\_C13

exp1 CARBON

SAMPLE PRESATURATION

date Apr 7 2017 satmode n

solvent cdc13 wet n

file SPECIAL

ACQUISITION temp not used

sw 25000.0 gain 30

at 1.311 spin not used

np 65536 hst 0.008

fb 17000 pw90 12.500

bs 16 a1fa 10.000

dl 1.000

nt 20000

ct 80

TRANSMITTER

tn C13 hs nn

sfrq 100.530

tor 1530.6 lb 1.00

tpwr 56 fn 131072

pw 6.250

DECOUPLER

dn H1 vp 22113.8

dof 0 rrf1 3198.4

dm yyy rfp 2738.8

decwave w rp -172.5

dpwr 42 lp 0

dmf 10152

PLOT

vc 247

sc 2

vs 135

th 15

nm cdc ph

191.260

166.540

142.874

139.747

136.842

128.933

128.312

120.707

77.315

76.833

76.877

51.729

ppm

<sup>1</sup>H NMR (CDCl<sub>3</sub>, 400 MHz) spectrum of compound **7gd** (table 4, entry 6)

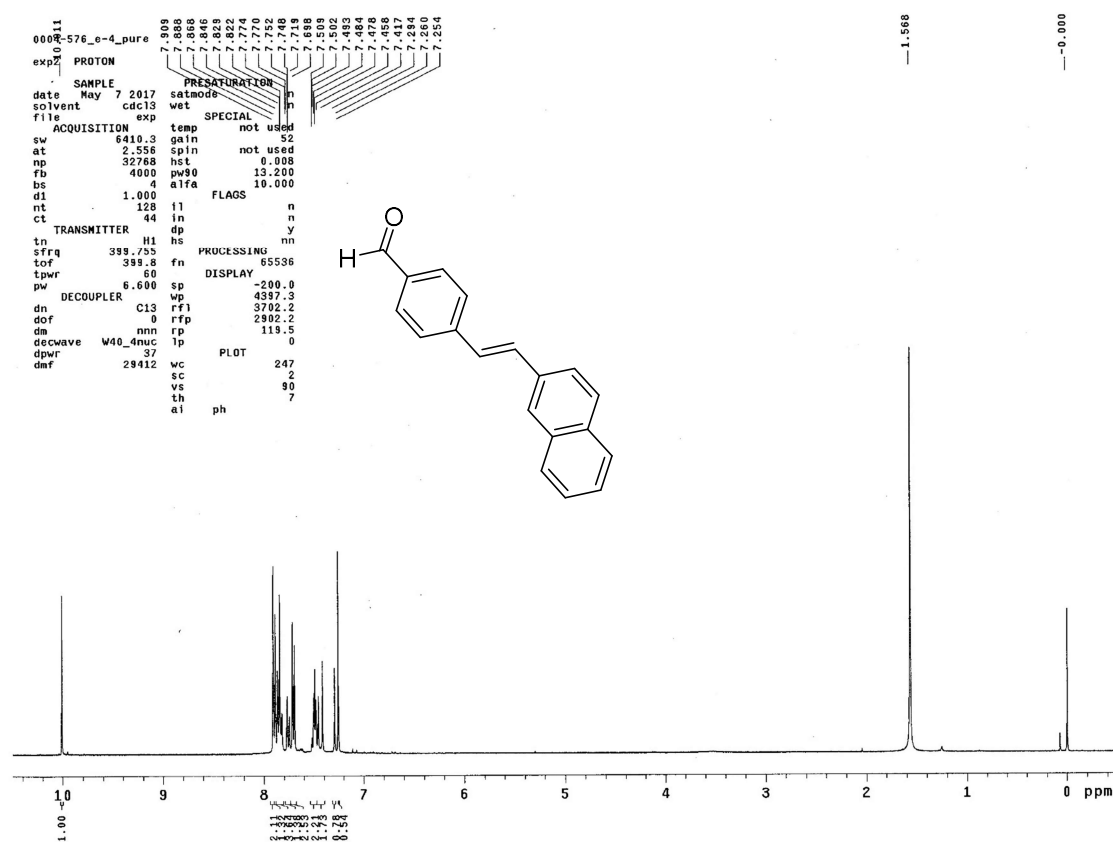

<sup>13</sup>C NMR (CDCl<sub>3</sub>, 100 MHz) spectrum of compound **7gd**

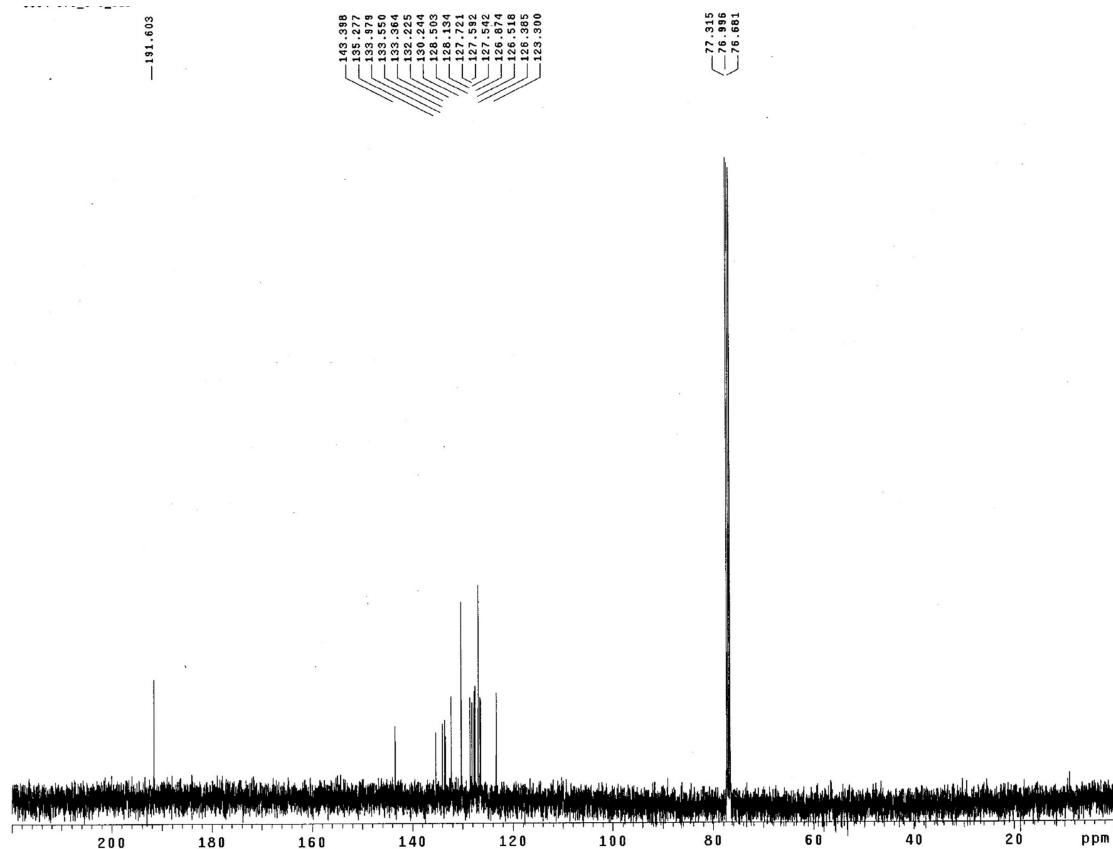

$^1\text{H}$  NMR ( $\text{CDCl}_3$ , 400 MHz) spectrum of compound **7ge** (table 4, entry 7)

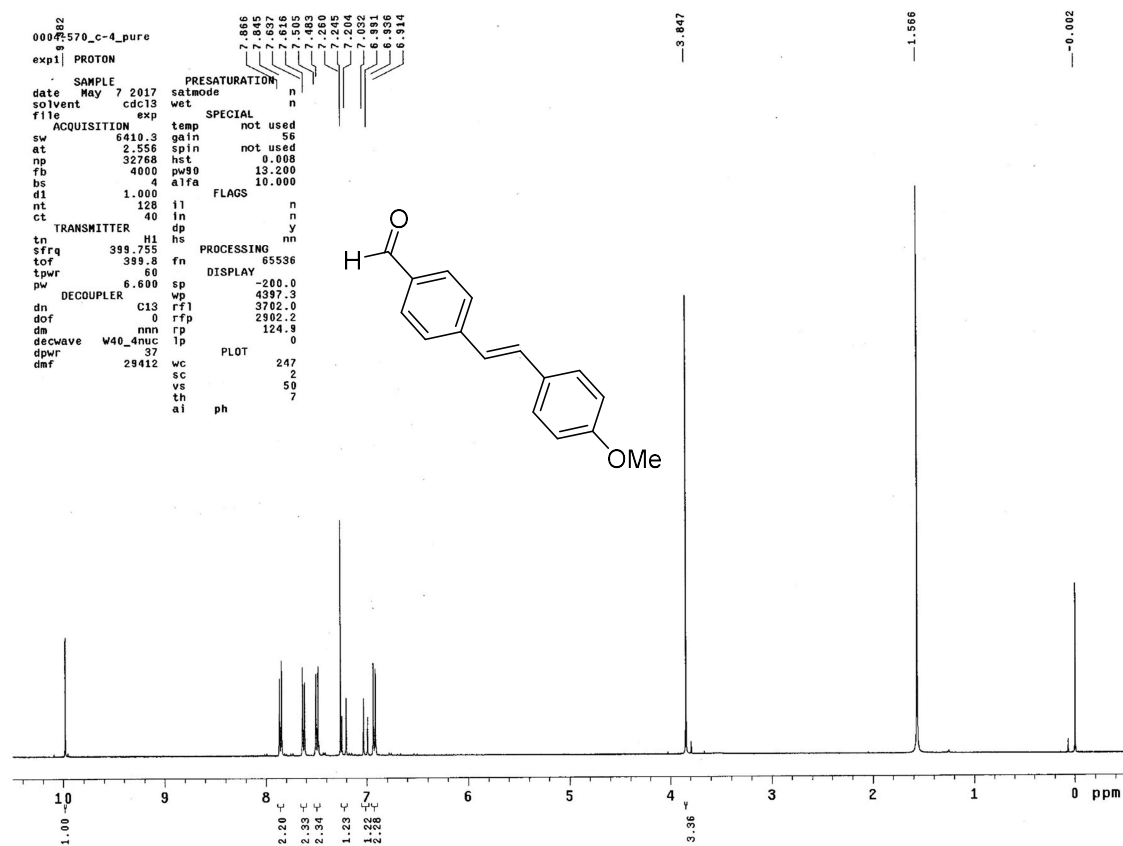

$^{13}\text{C}$  NMR ( $\text{CDCl}_3$ , 100 MHz) spectrum of compound **7ge**

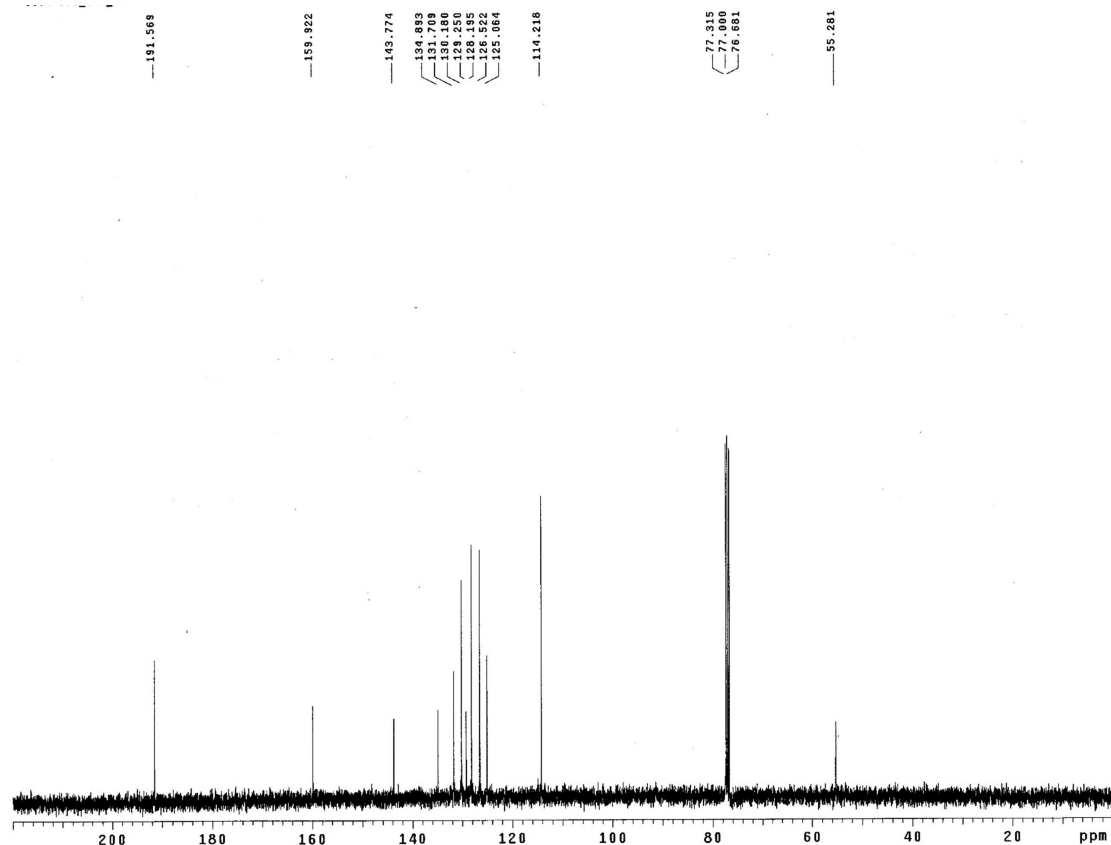

<sup>1</sup>H NMR (CDCl<sub>3</sub>, 400 MHz) spectrum of compound **7se** (table 4, entry 8)

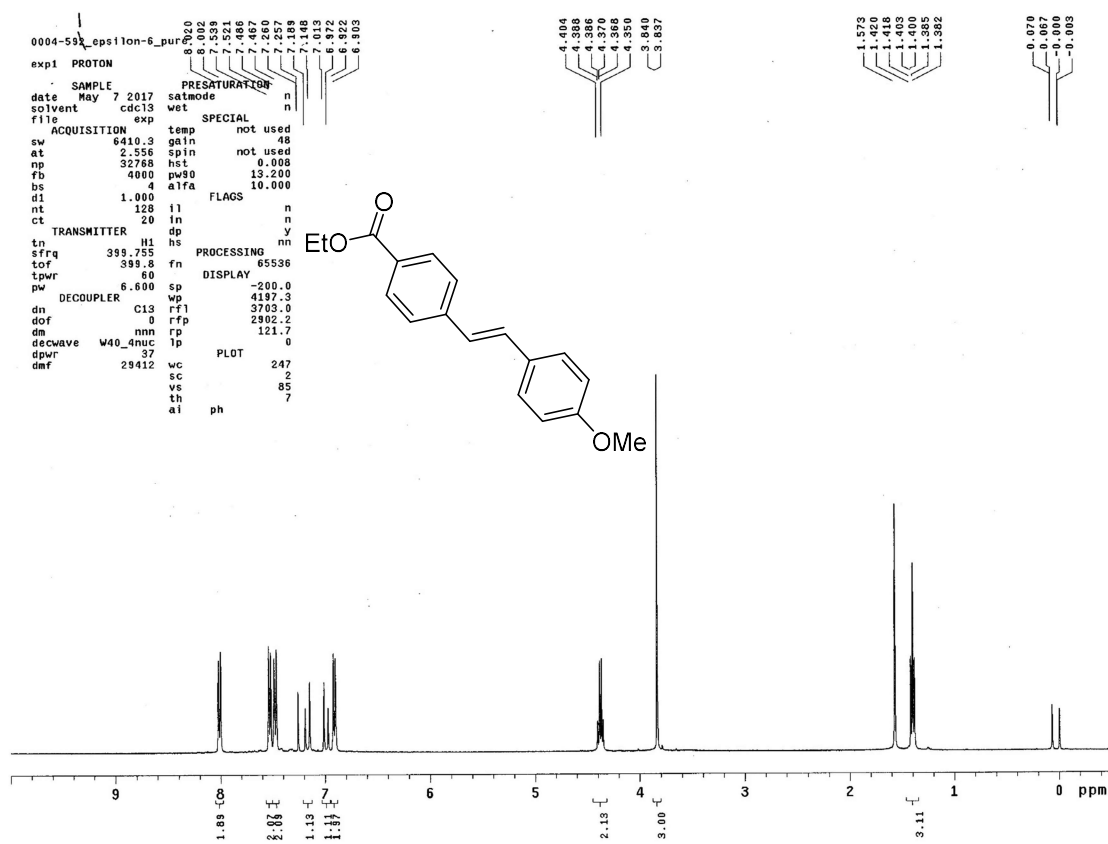

<sup>13</sup>C NMR (CDCl<sub>3</sub>, 100 MHz) spectrum of compound **7se**

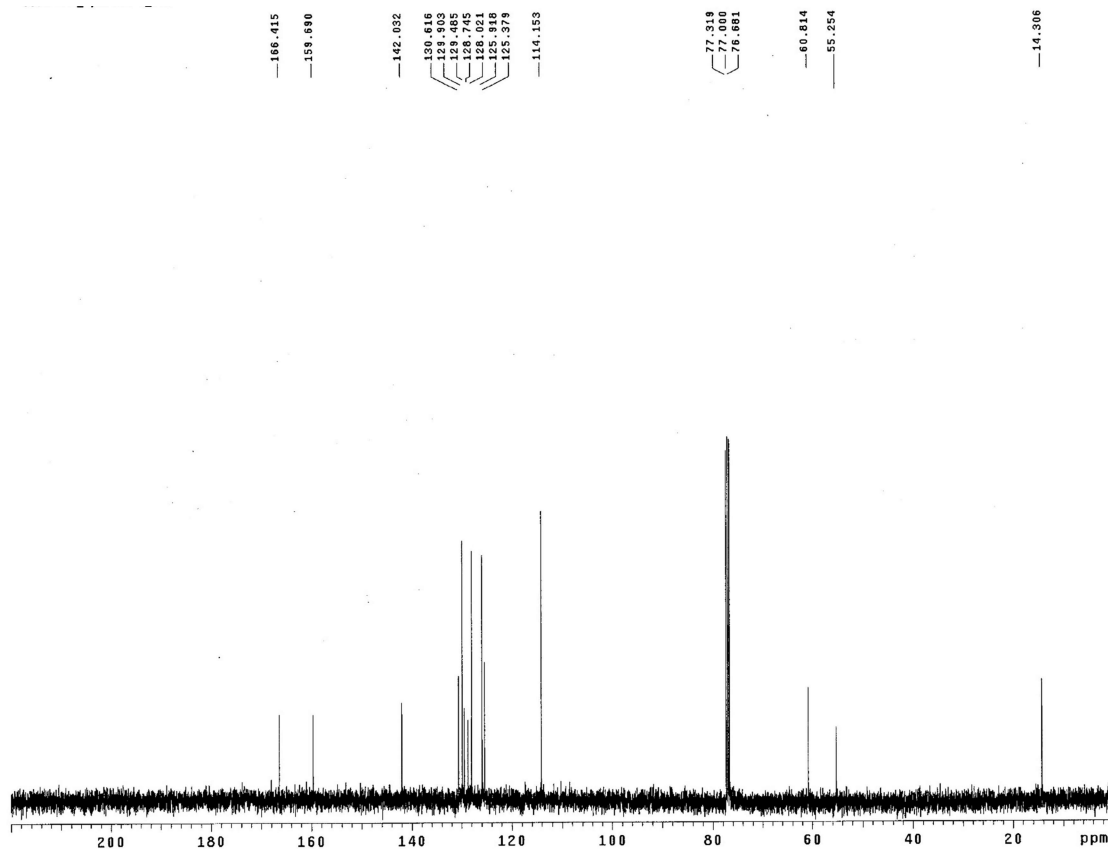

<sup>1</sup>H NMR (CDCl<sub>3</sub>, 400 MHz) spectrum of compound **7ta** (table 4, entry 9)

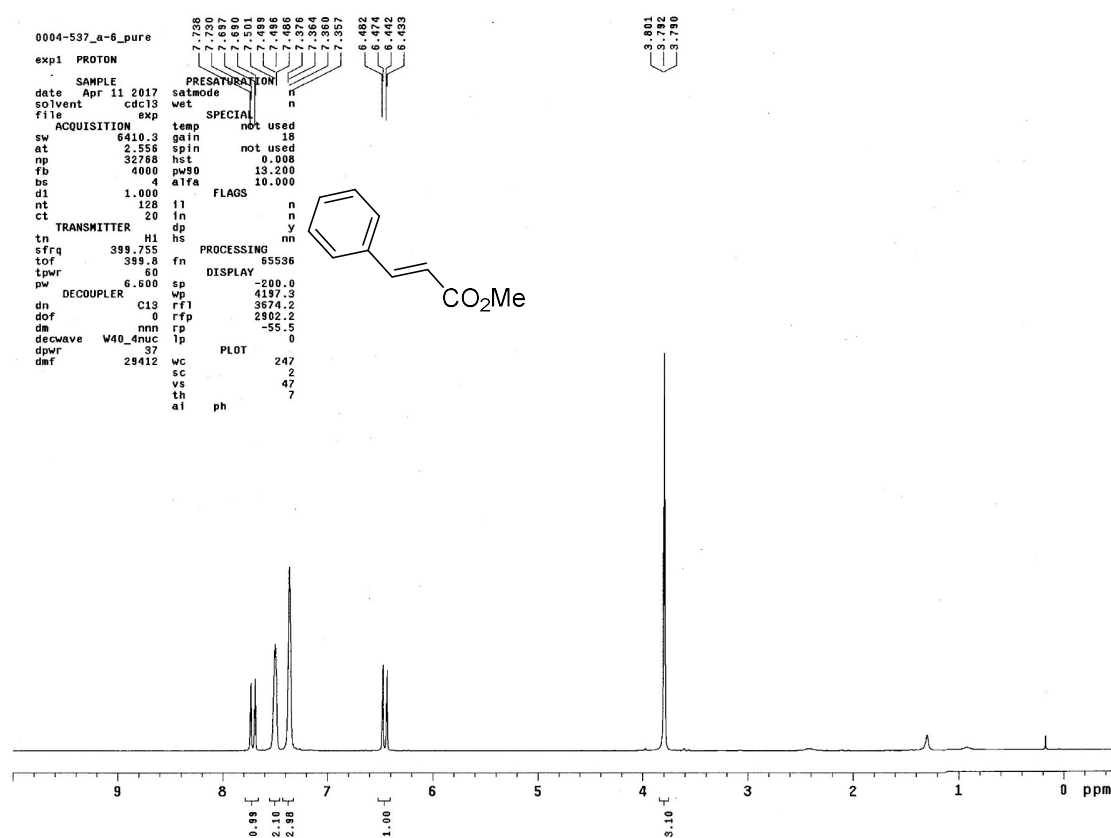

<sup>13</sup>C NMR (CDCl<sub>3</sub>, 100 MHz) spectrum of compound **7ta**

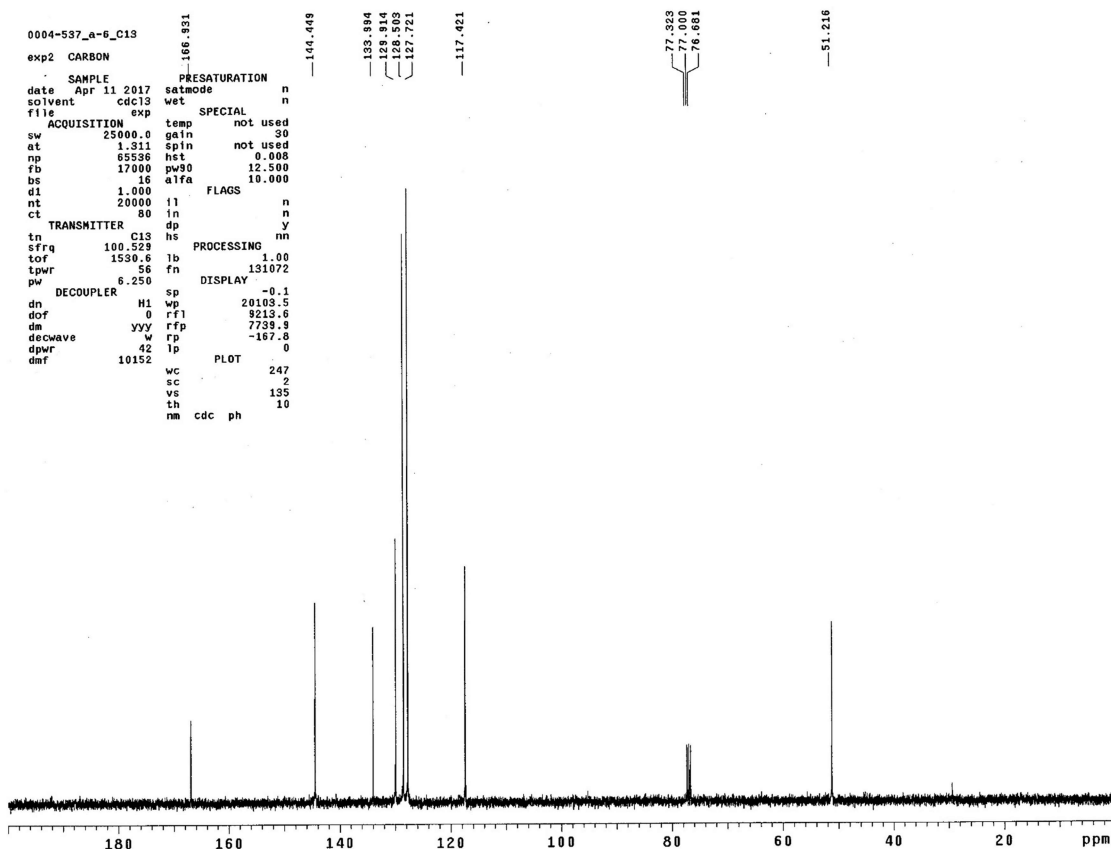

<sup>1</sup>H NMR (CDCl<sub>3</sub>, 400 MHz) spectrum of compound **7aa** (table 4, entry 10)

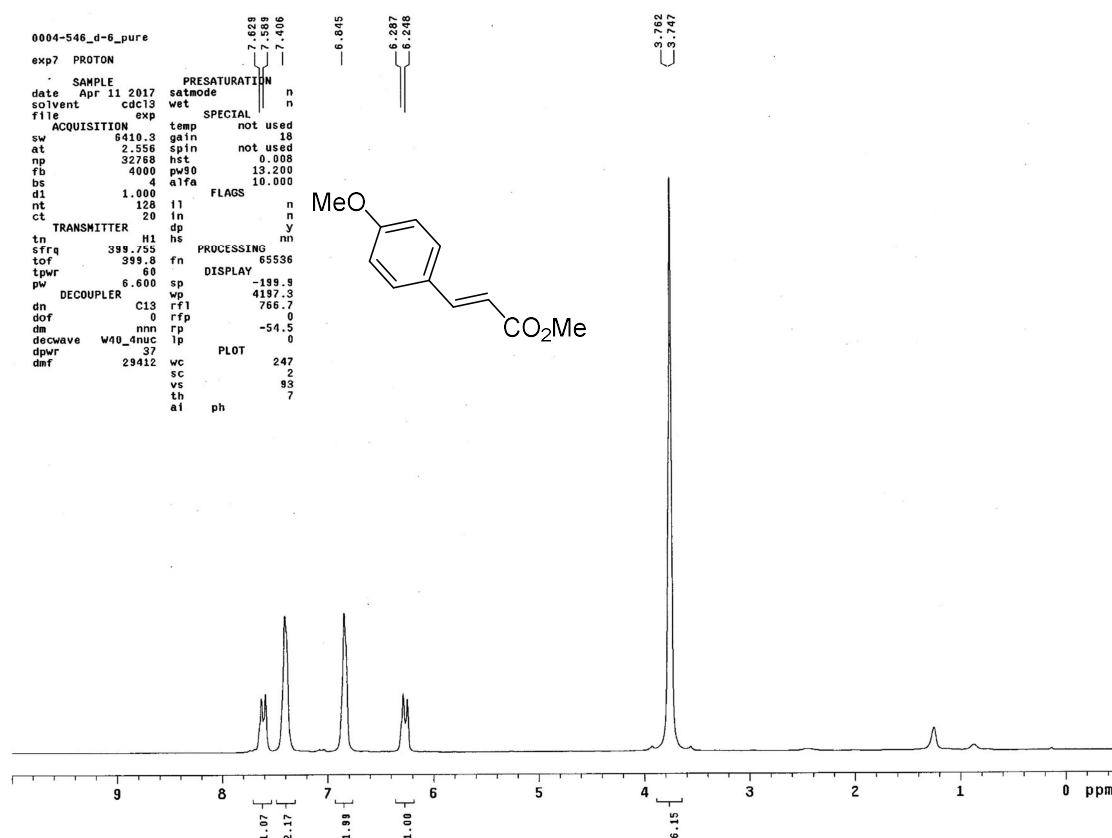

<sup>13</sup>C NMR (CDCl<sub>3</sub>, 100 MHz) spectrum of compound **7aa**

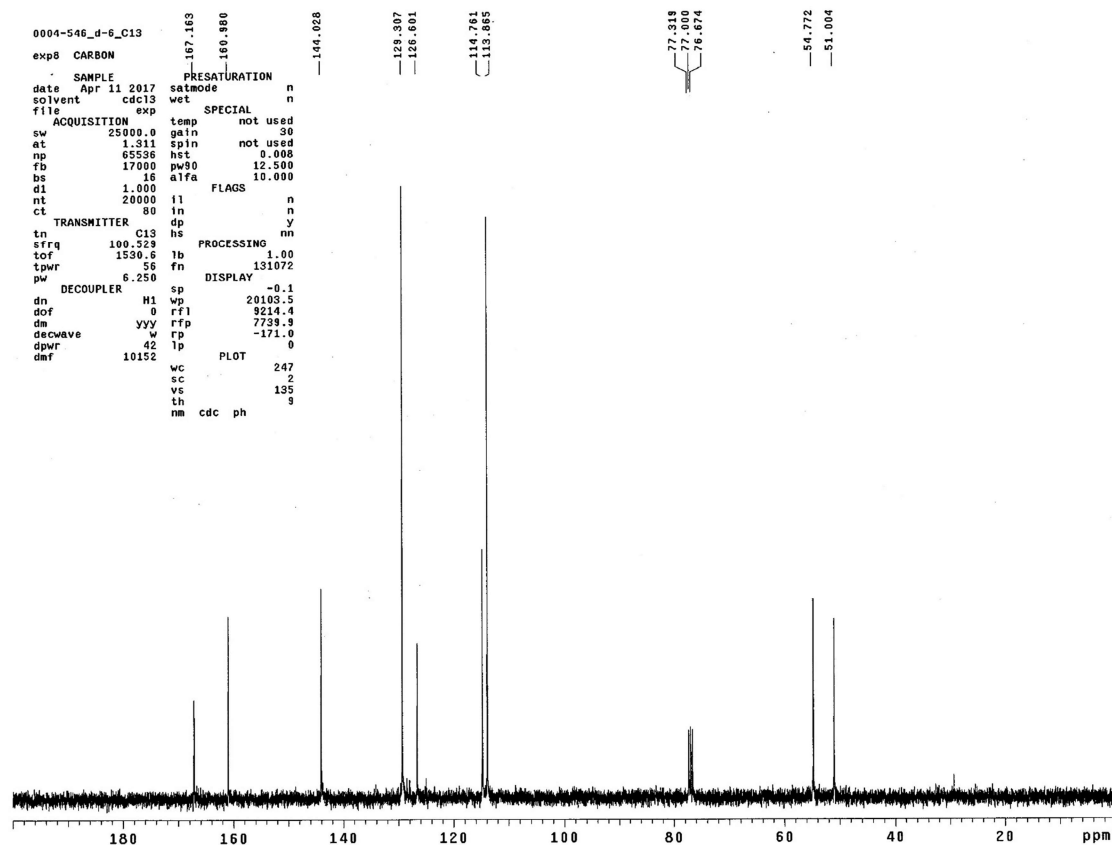

$^1\text{H}$  NMR ( $\text{CDCl}_3$ , 400 MHz) spectrum of compound **7tf** (table 4, entry 11)

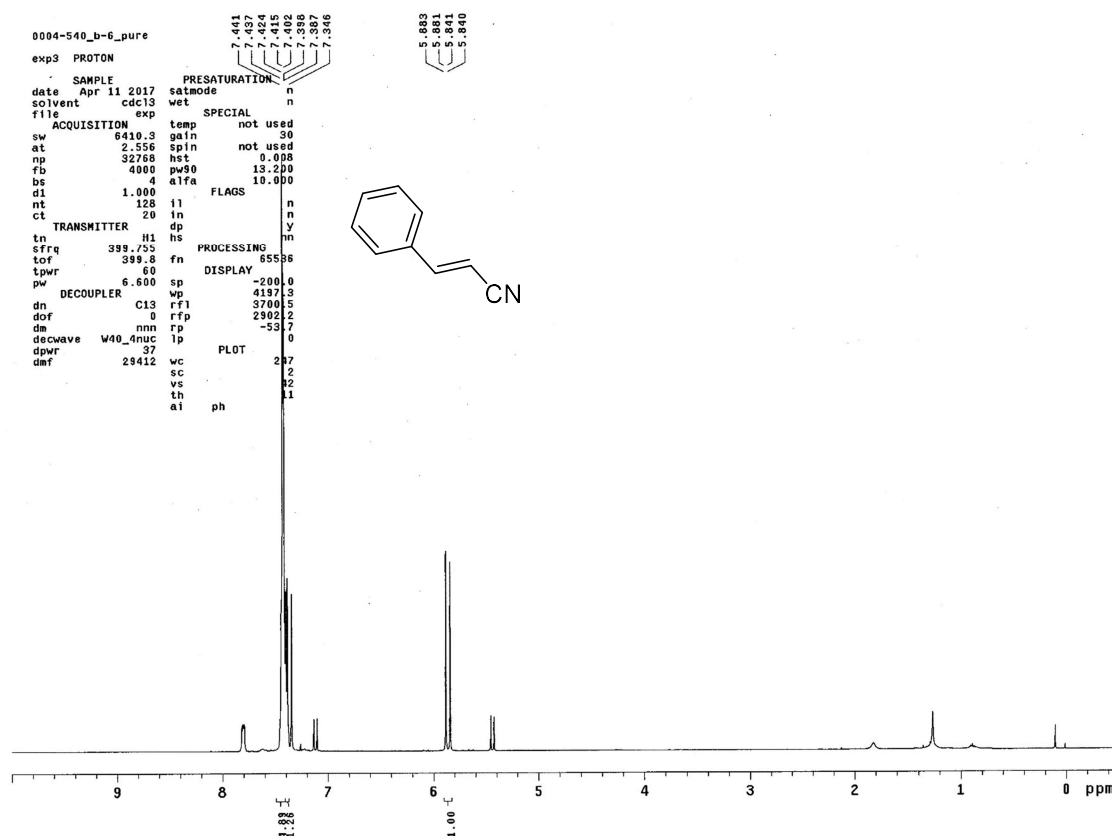

$^{13}\text{C}$  NMR ( $\text{CDCl}_3$ , 100 MHz) spectrum of compound **7tf**

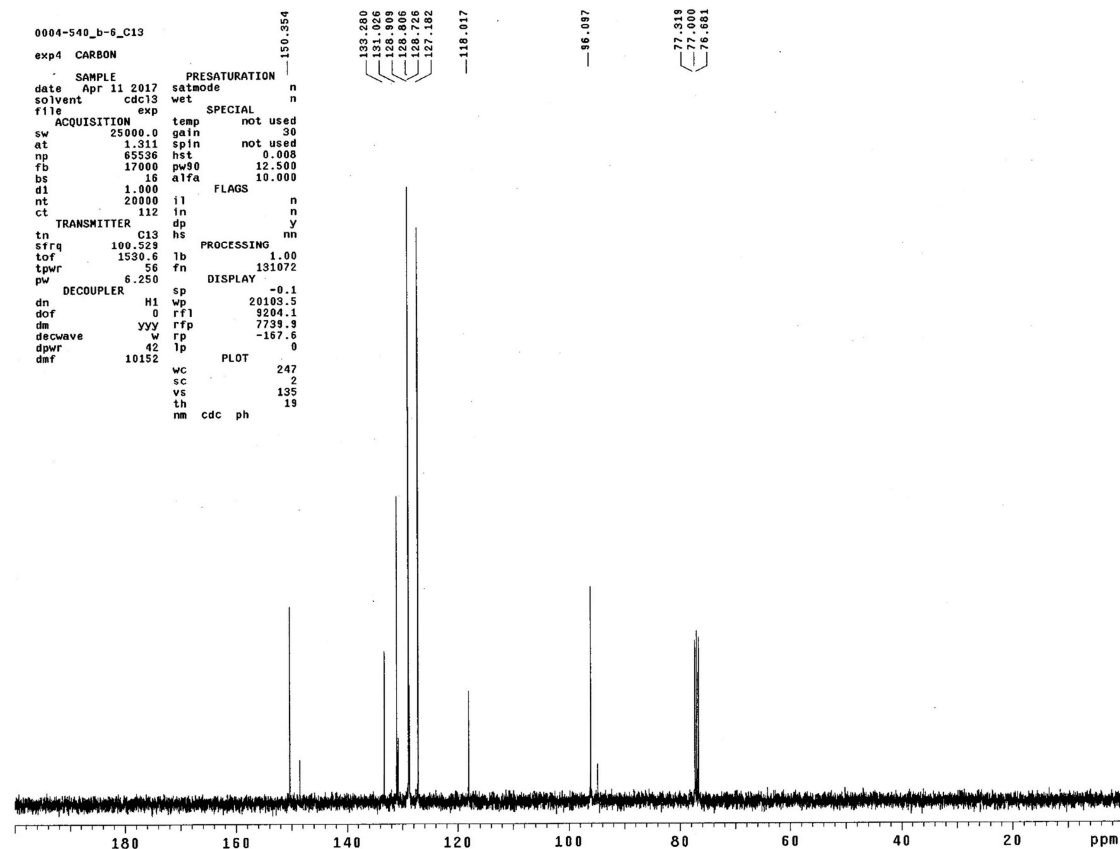



<sup>1</sup>H NMR (CDCl<sub>3</sub>, 400 MHz) spectrum of compound **7af** (table 4, entry 12)

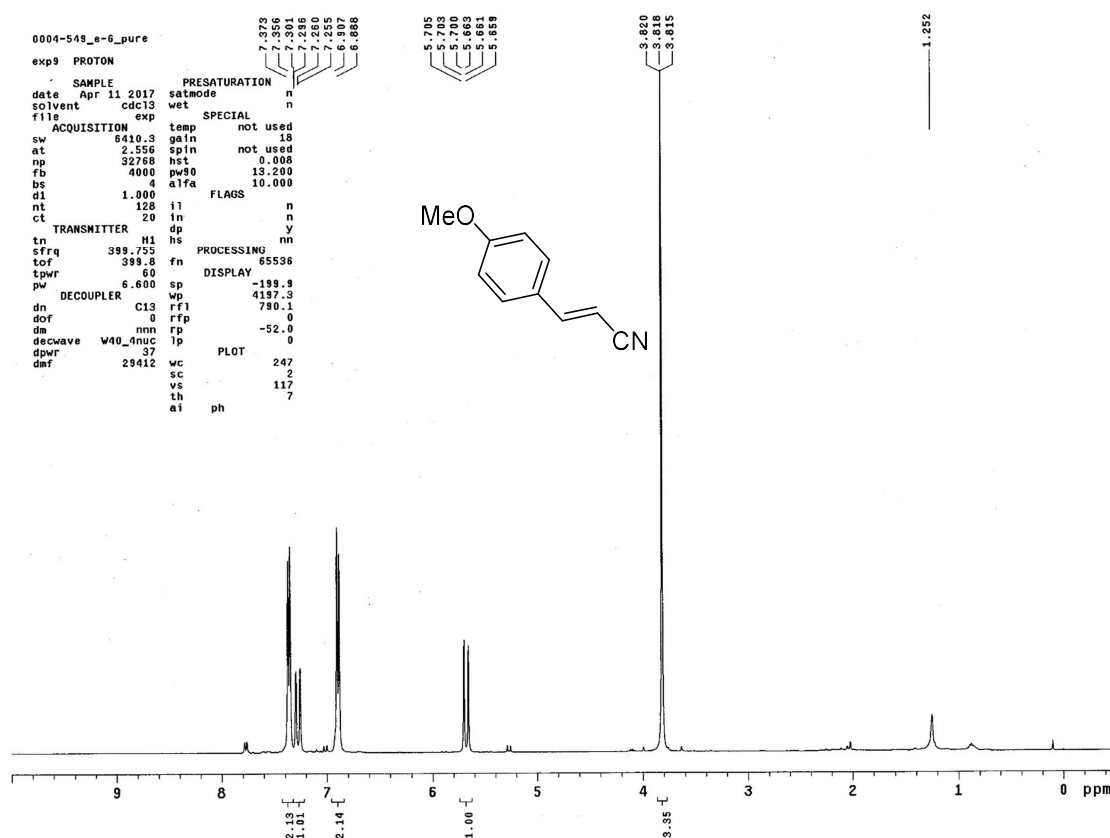

<sup>13</sup>C NMR (CDCl<sub>3</sub>, 100 MHz) spectrum of compound **7af**

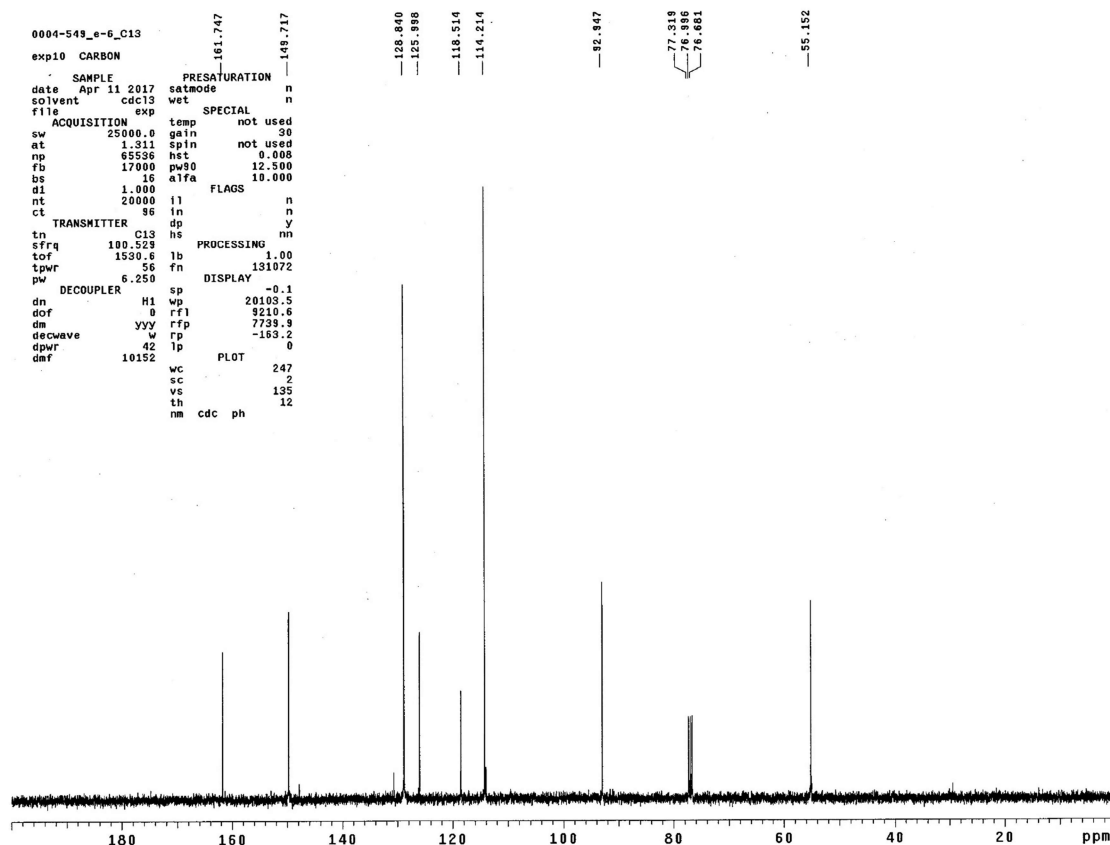

$^1\text{H}$  NMR ( $\text{CDCl}_3$ , 400 MHz) spectrum of compound **7tb** (table 4, entry 13)

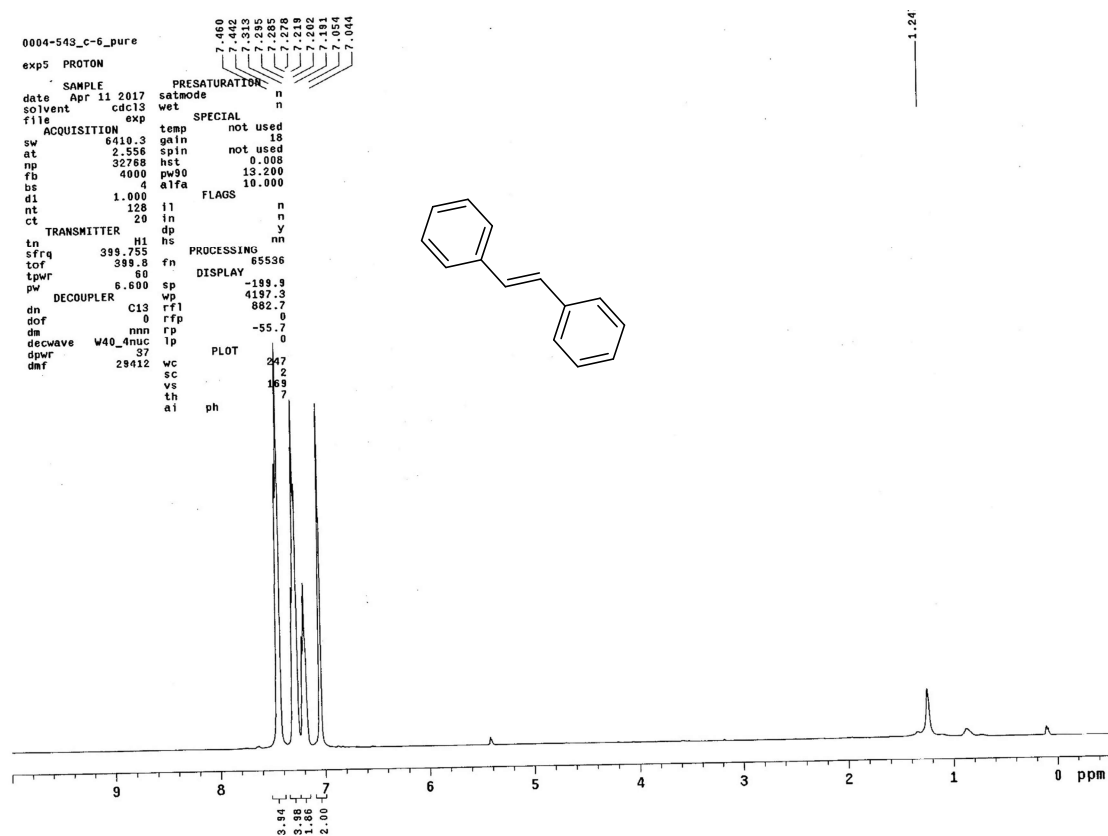

$^{13}\text{C}$  NMR ( $\text{CDCl}_3$ , 100 MHz) spectrum of compound **7tb**

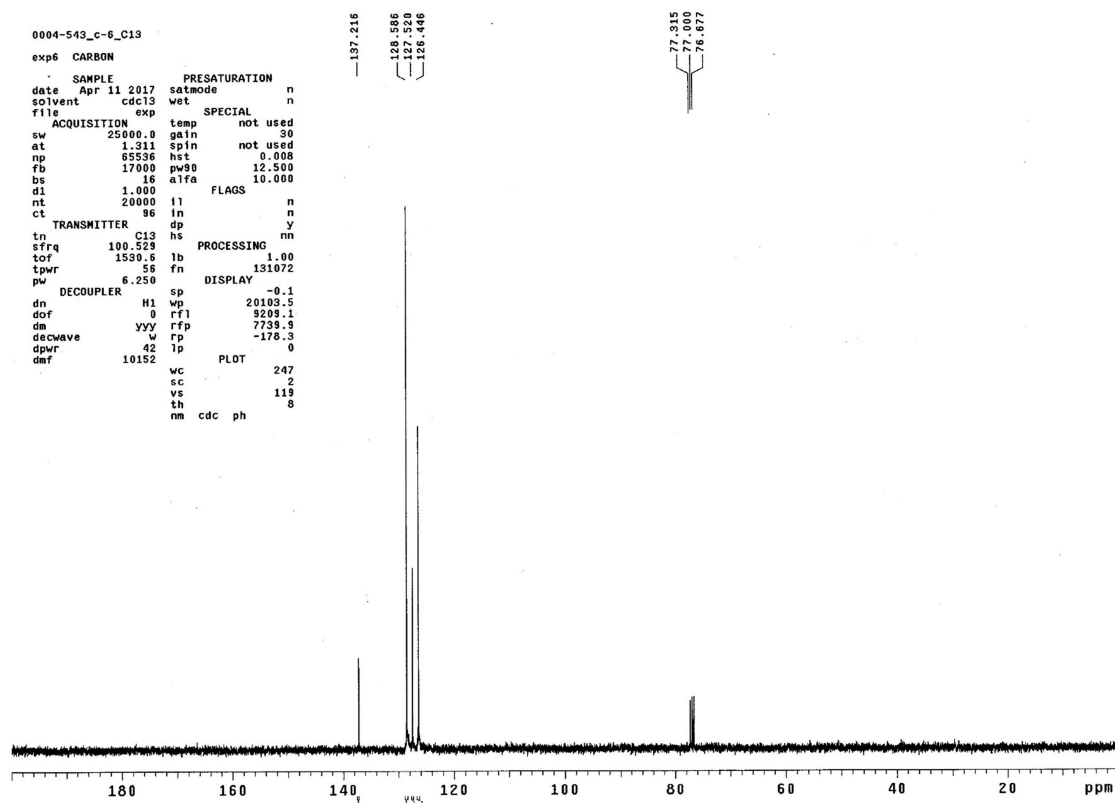

$^1\text{H}$  NMR ( $\text{CDCl}_3$ , 400 MHz) spectrum of compound **10aa** (table 6, entry 1)

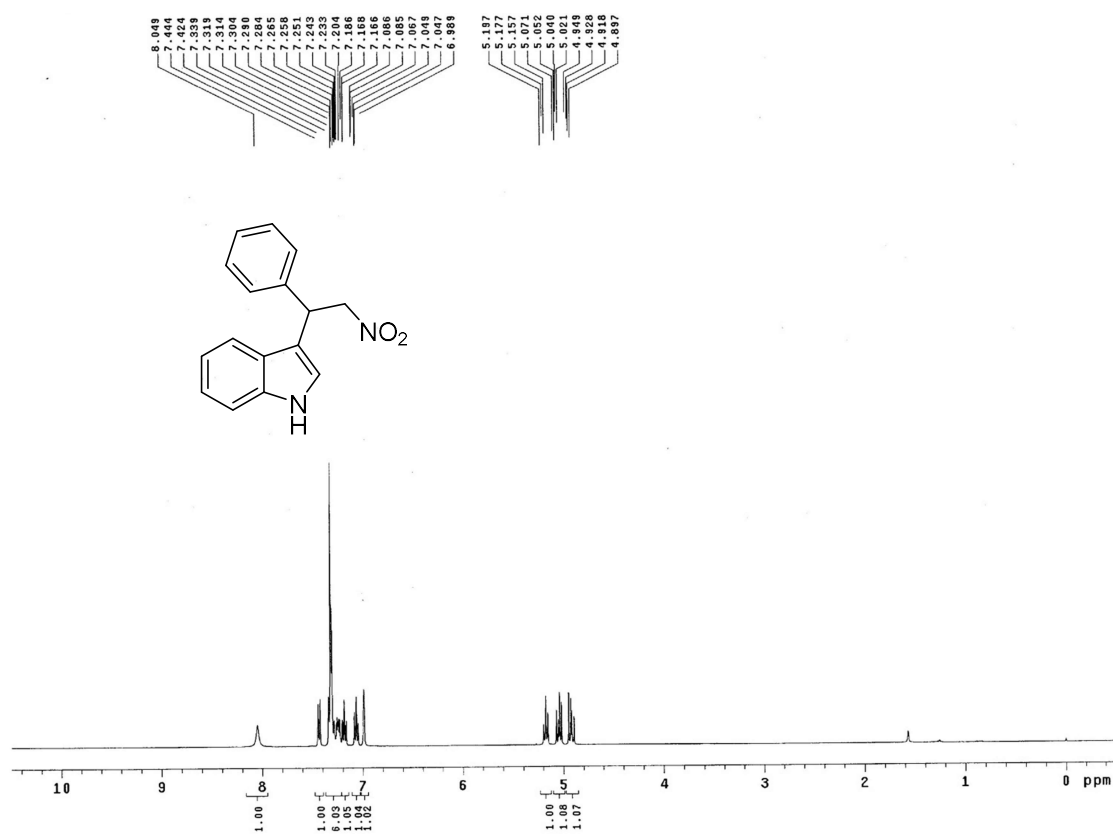

$^{13}\text{C}$  NMR ( $\text{CDCl}_3$ , 100 MHz) spectrum of compound **10aa**

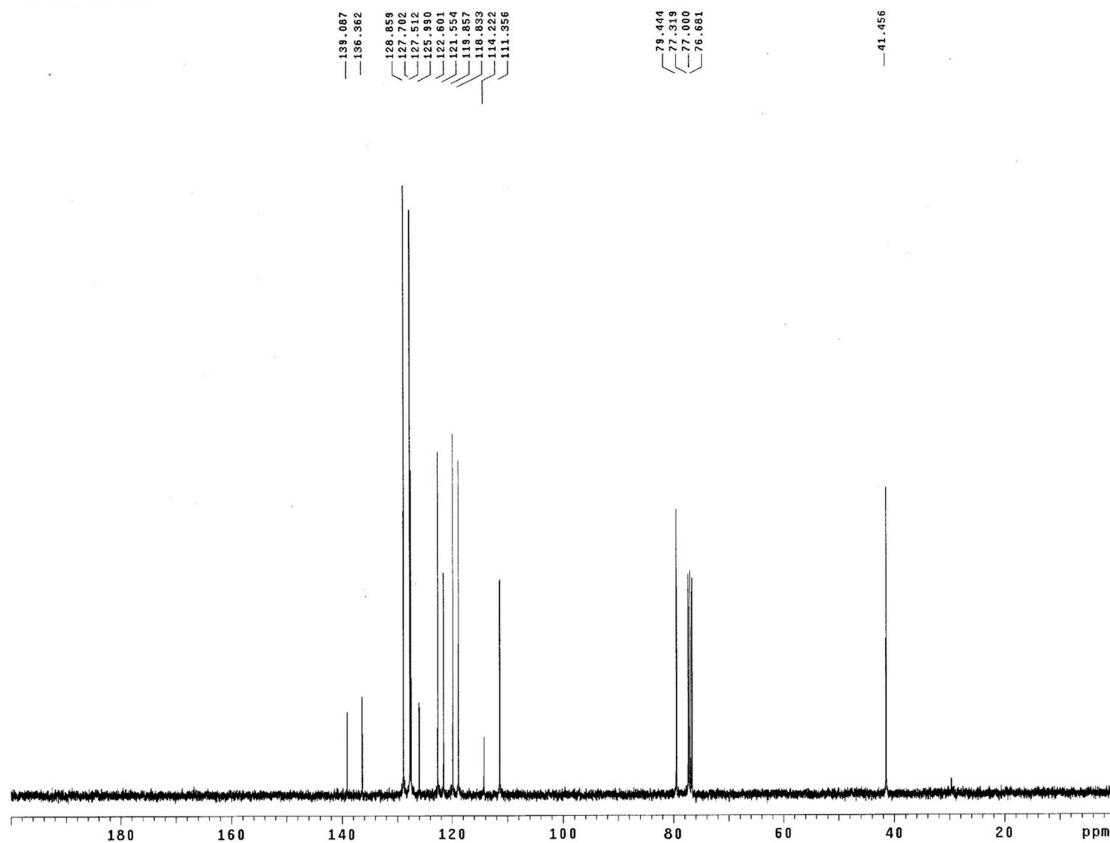

$^1\text{H}$  NMR ( $\text{CDCl}_3$ , 400 MHz) spectrum of compound **10ba** (table 6, entry 2)

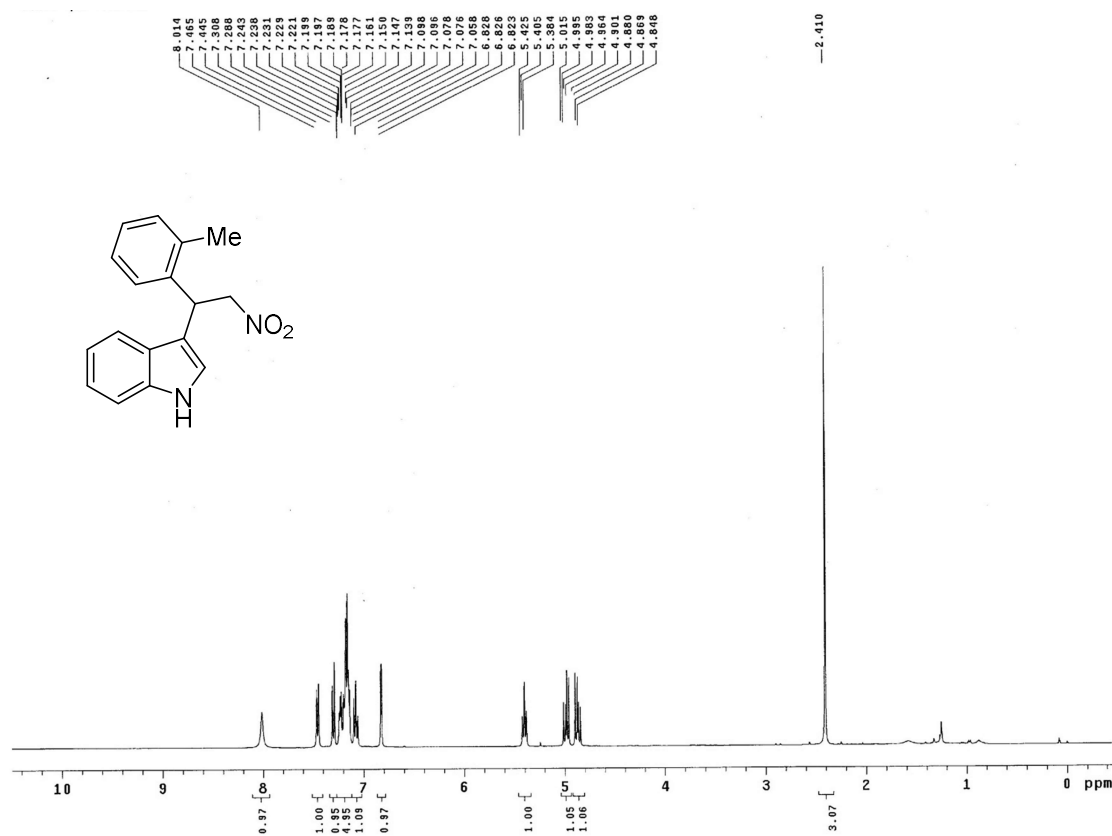

$^{13}\text{C}$  NMR ( $\text{CDCl}_3$ , 100 MHz) spectrum of compound **10ba**

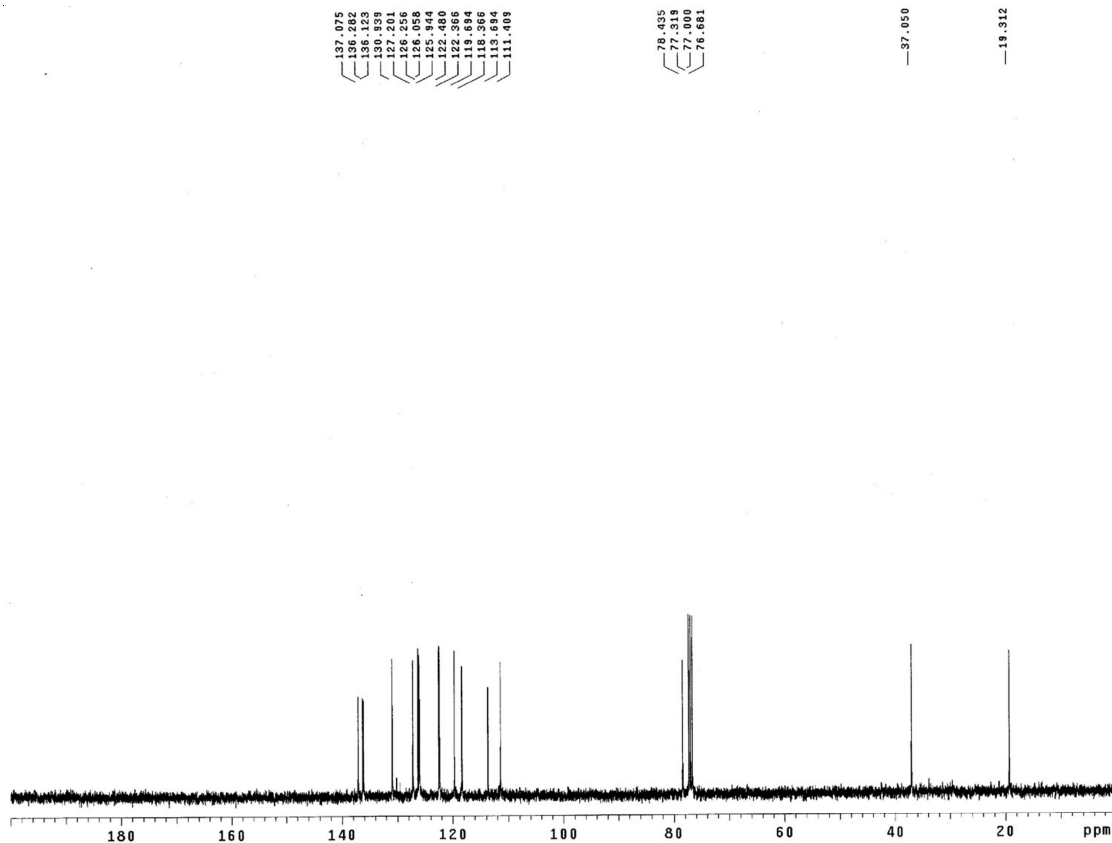

$^1\text{H}$  NMR ( $\text{CDCl}_3$ , 400 MHz) spectrum of compound **10ca** (table 6, entry 3)

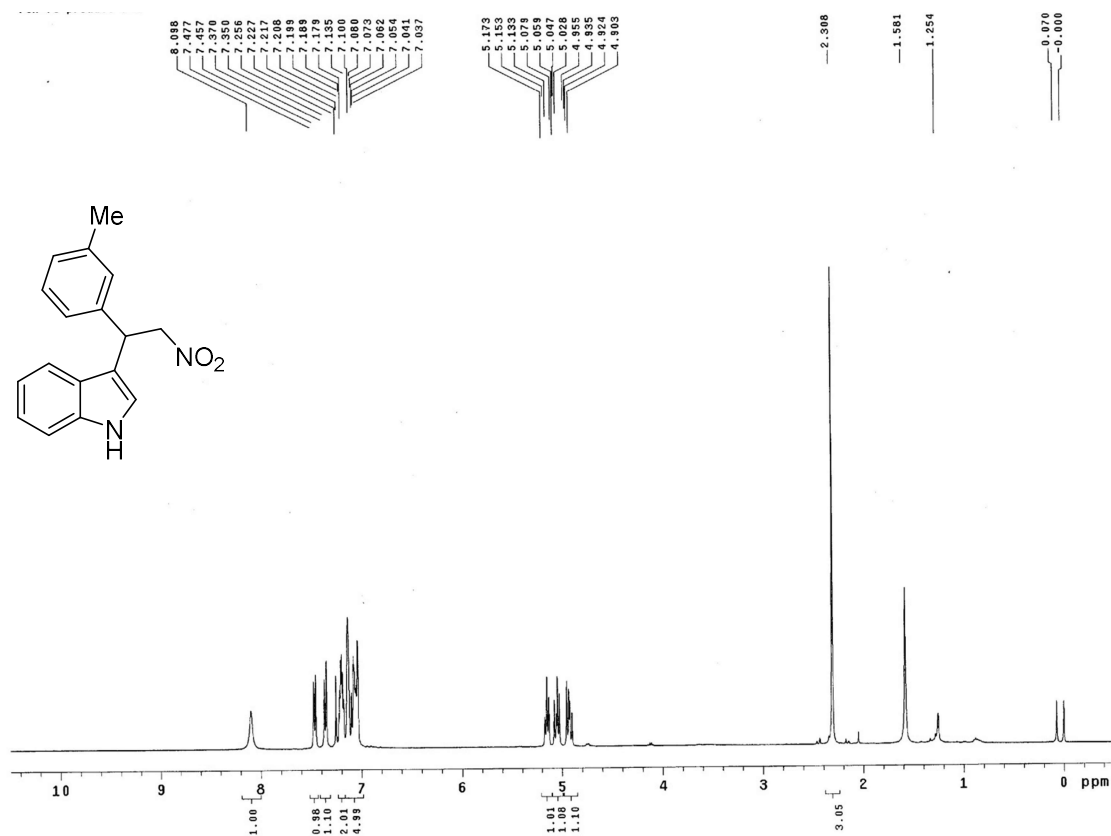

$^{13}\text{C}$  NMR ( $\text{CDCl}_3$ , 100 MHz) spectrum of compound **10ca**

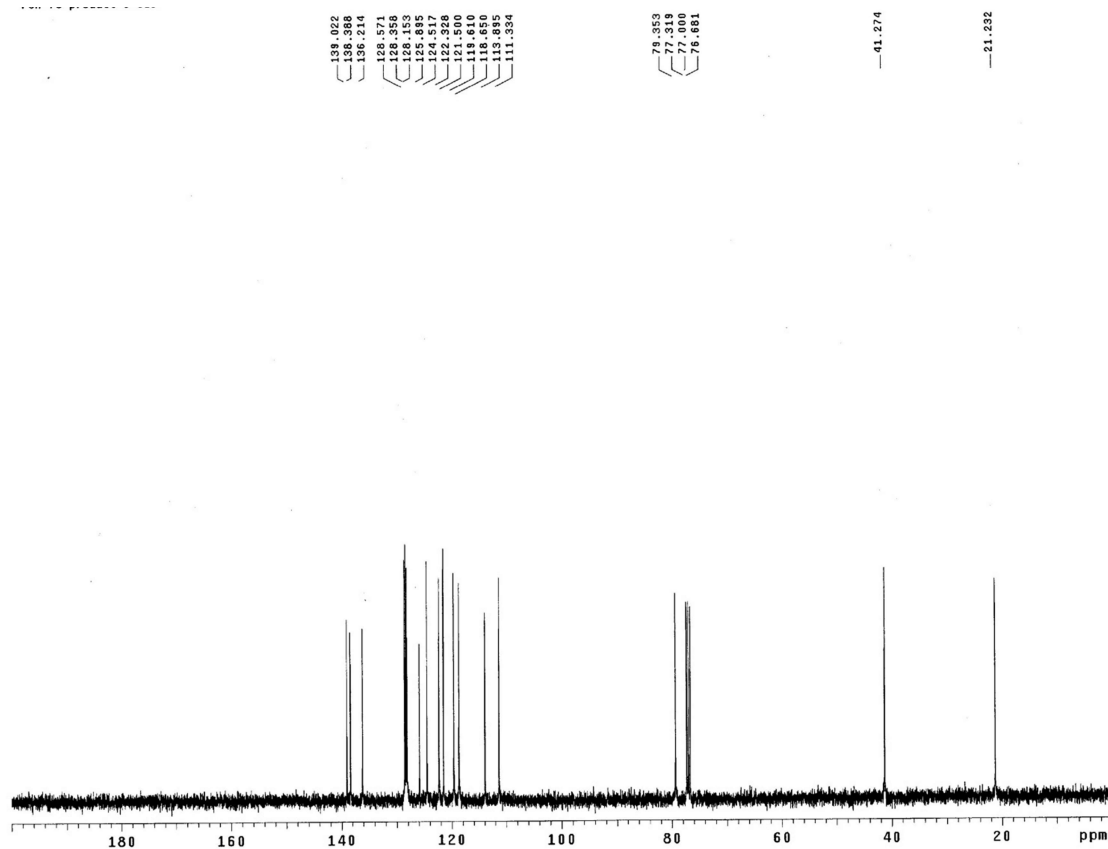

$^1\text{H}$  NMR ( $\text{CDCl}_3$ , 400 MHz) spectrum of compound **10da** (table 6, entry 4)

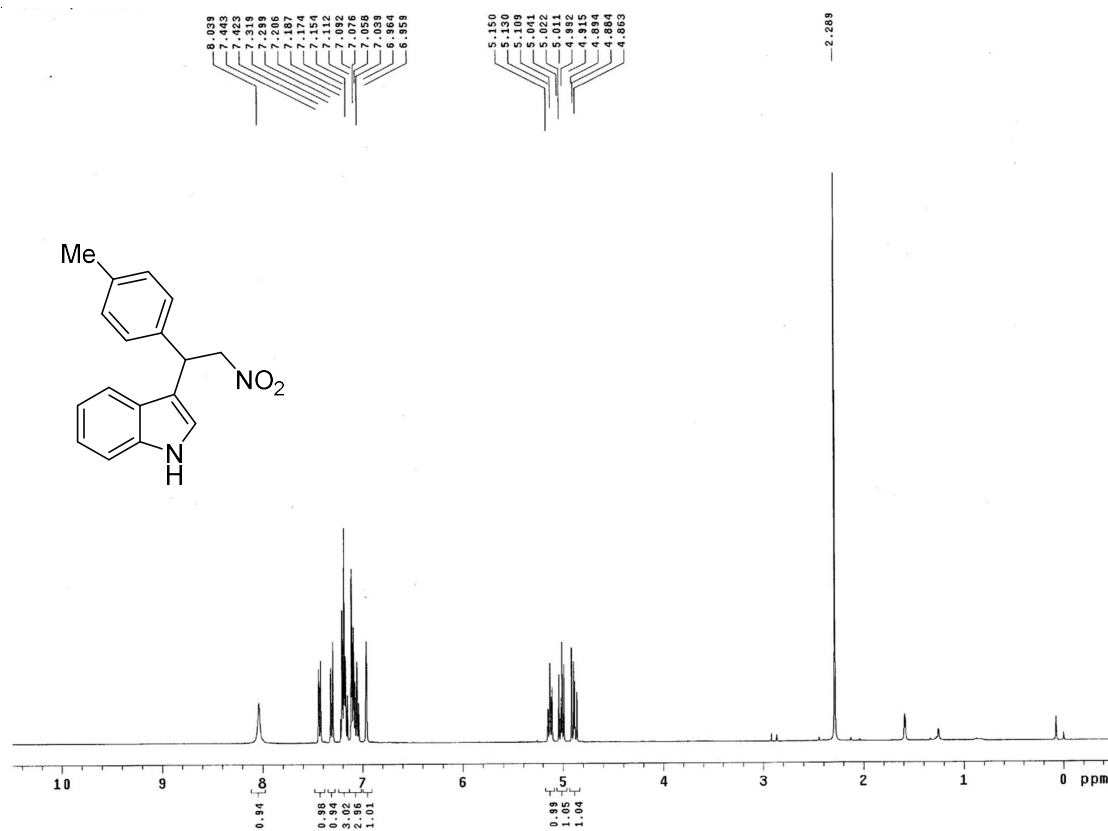

$^{13}\text{C}$  NMR ( $\text{CDCl}_3$ , 100 MHz) spectrum of compound **10da**

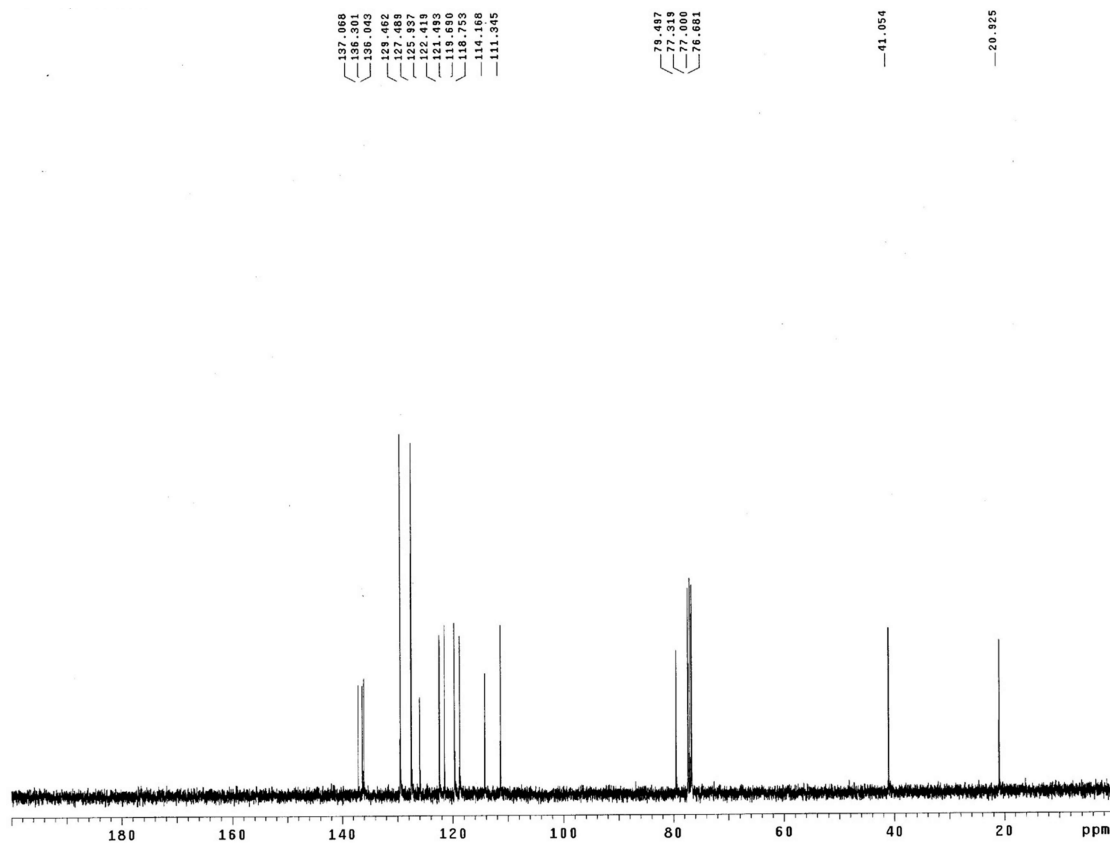

$^1\text{H}$  NMR ( $\text{CDCl}_3$ , 400 MHz) spectrum of compound **10ea** (table 6, entry 5)

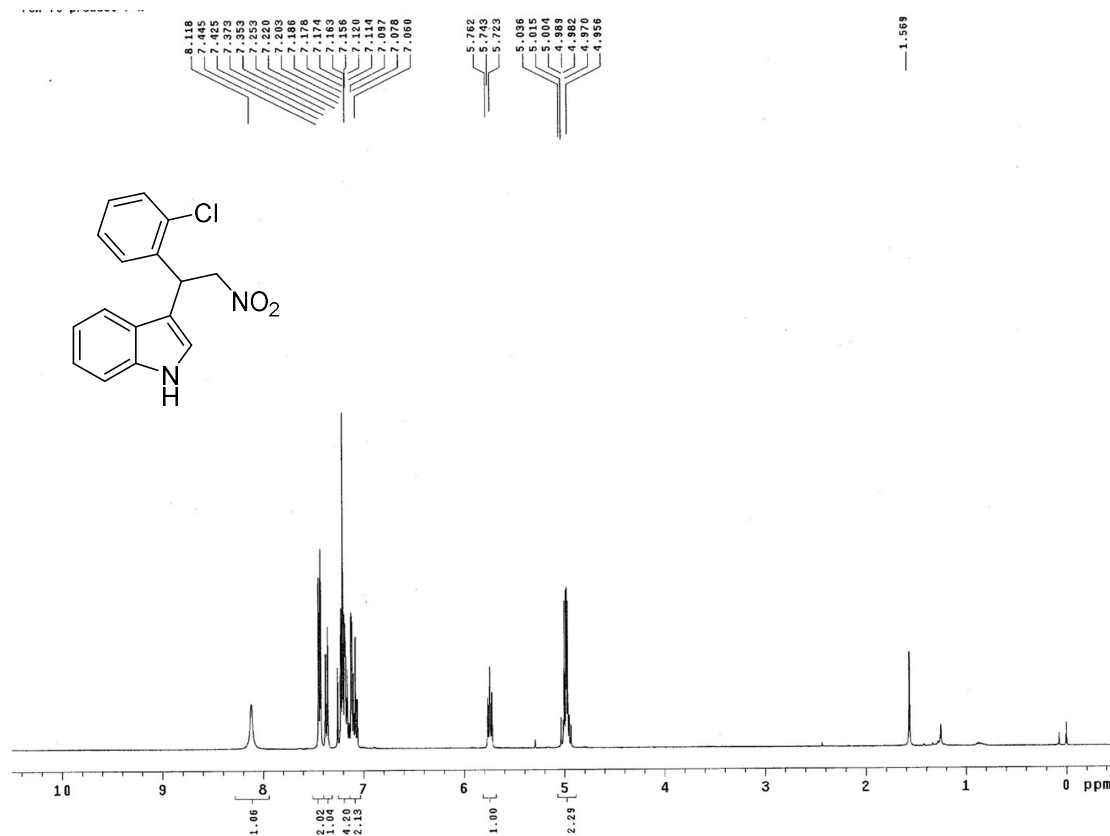

$^{13}\text{C}$  NMR ( $\text{CDCl}_3$ , 100 MHz) spectrum of compound **10ea**

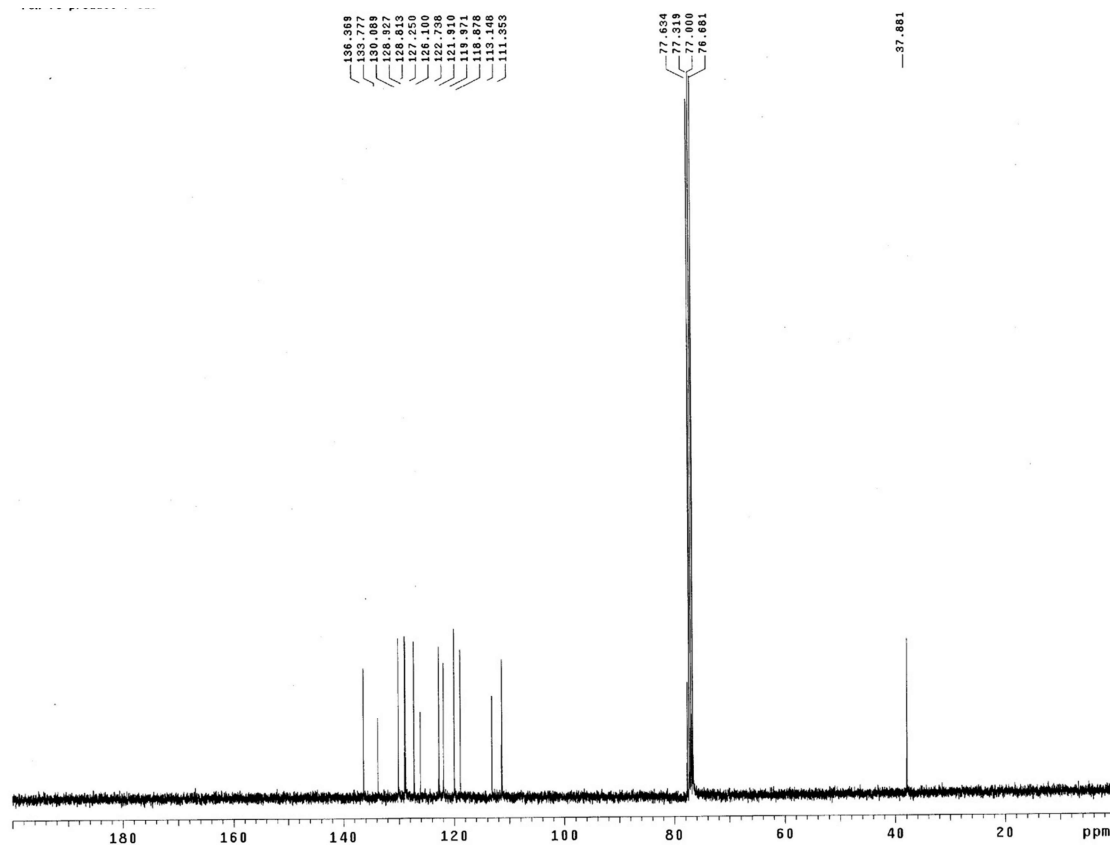





$^1\text{H}$  NMR ( $\text{CDCl}_3$ , 400 MHz) spectrum of compound **10ga** (table 6, entry 7)

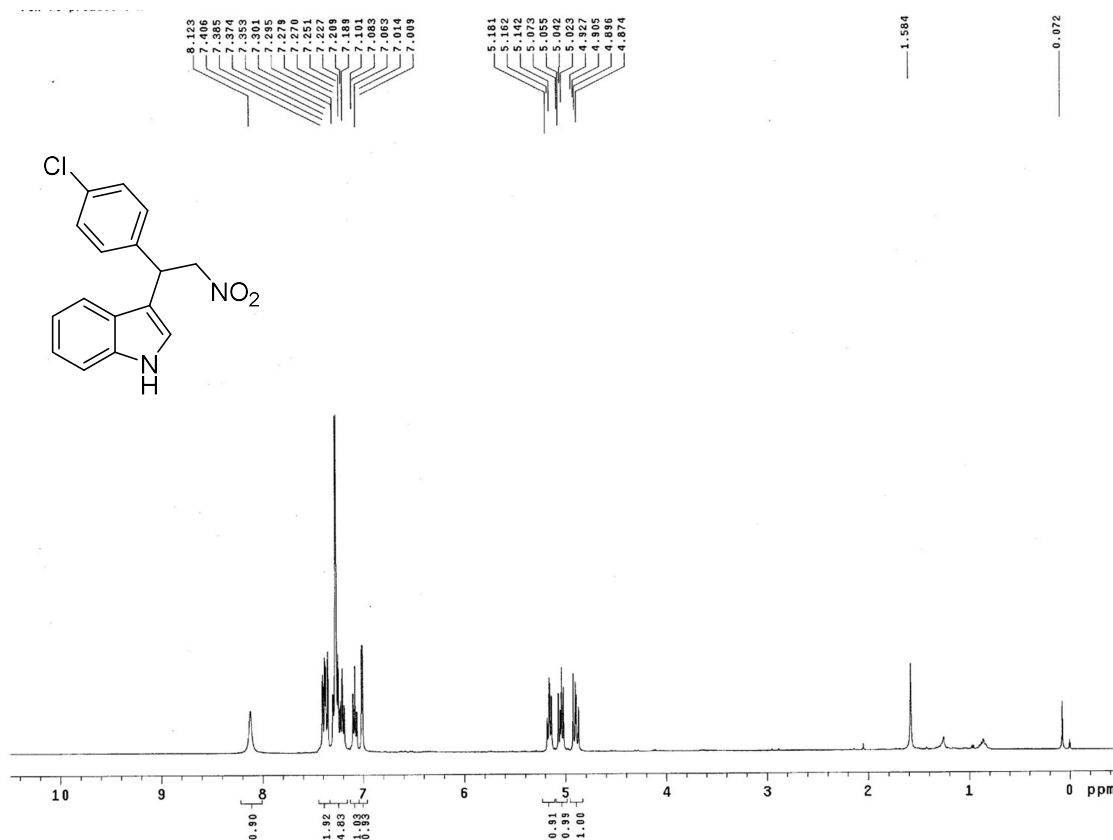

$^{13}\text{C}$  NMR ( $\text{CDCl}_3$ , 100 MHz) spectrum of compound **10ga**

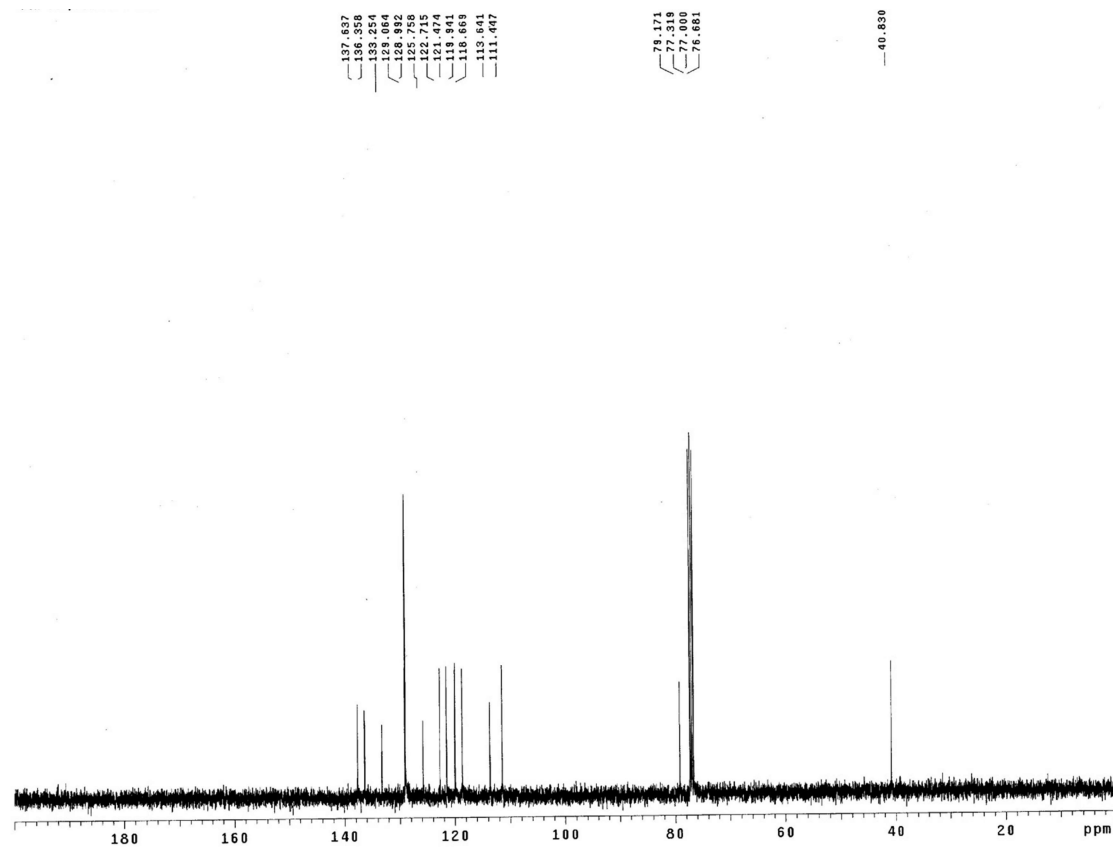

$^1\text{H}$  NMR ( $\text{CDCl}_3$ , 400 MHz) spectrum of compound **10ha** (table 6, entry 8)

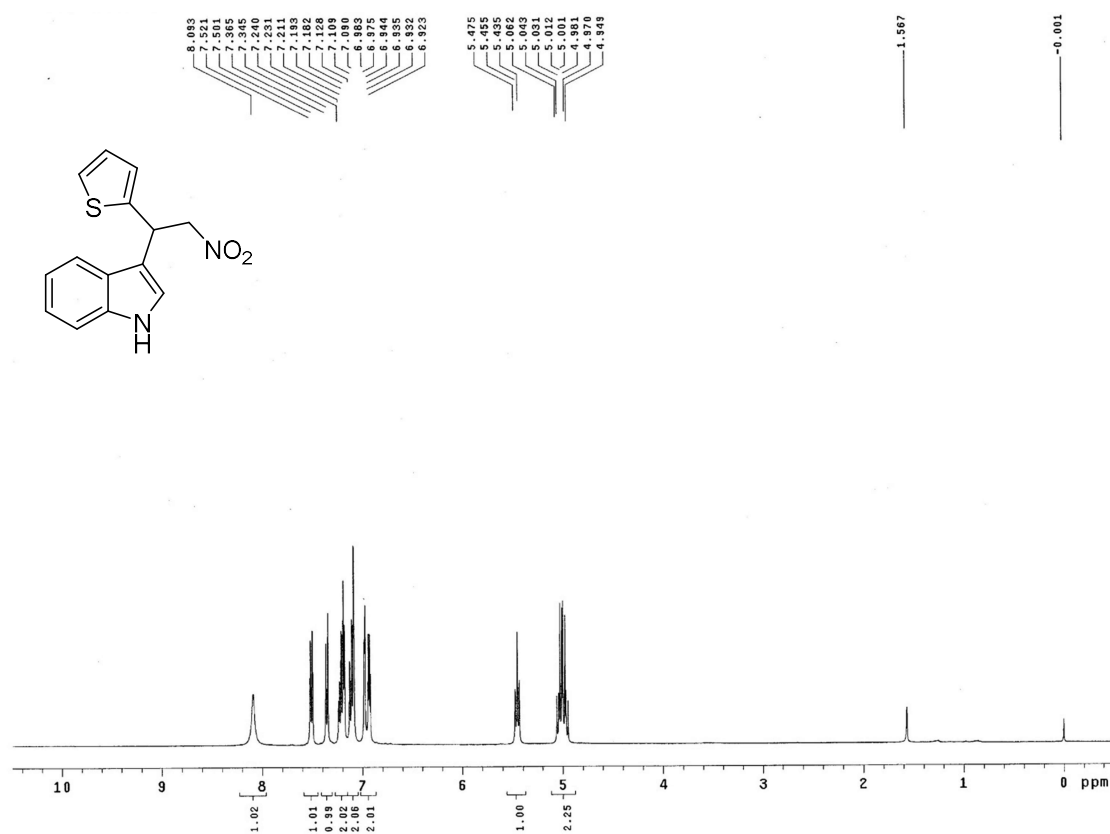

$^{13}\text{C}$  NMR ( $\text{CDCl}_3$ , 100 MHz) spectrum of compound **10ha**

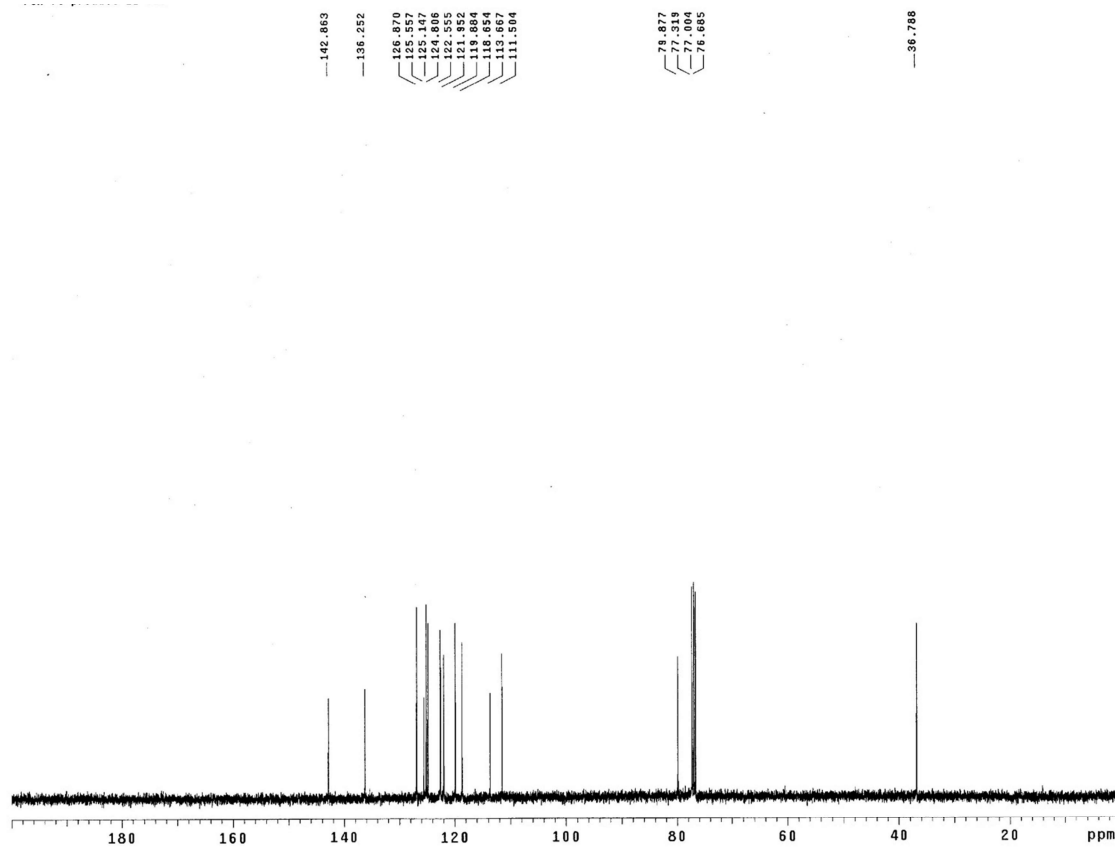

$^1\text{H}$  NMR ( $\text{CDCl}_3$ , 400 MHz) spectrum of compound **10ia** (table 6, entry 9)

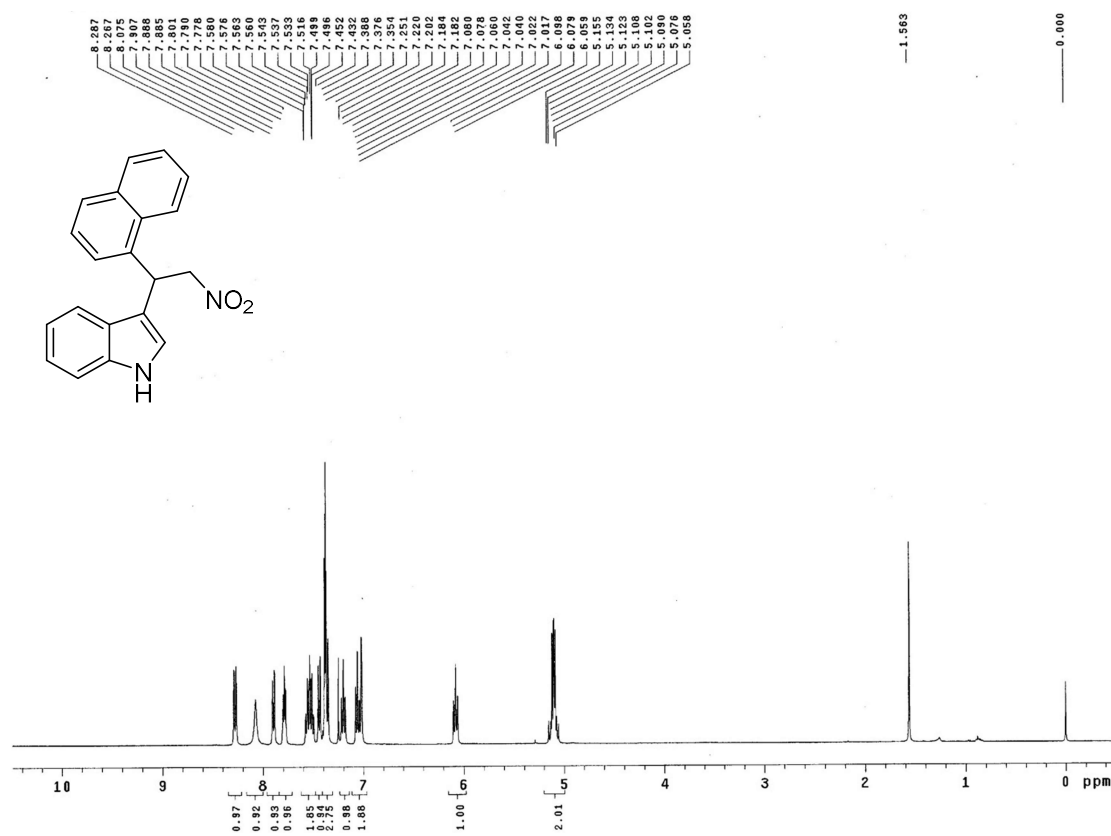

$^{13}\text{C}$  NMR ( $\text{CDCl}_3$ , 100 MHz) spectrum of compound **10ia**

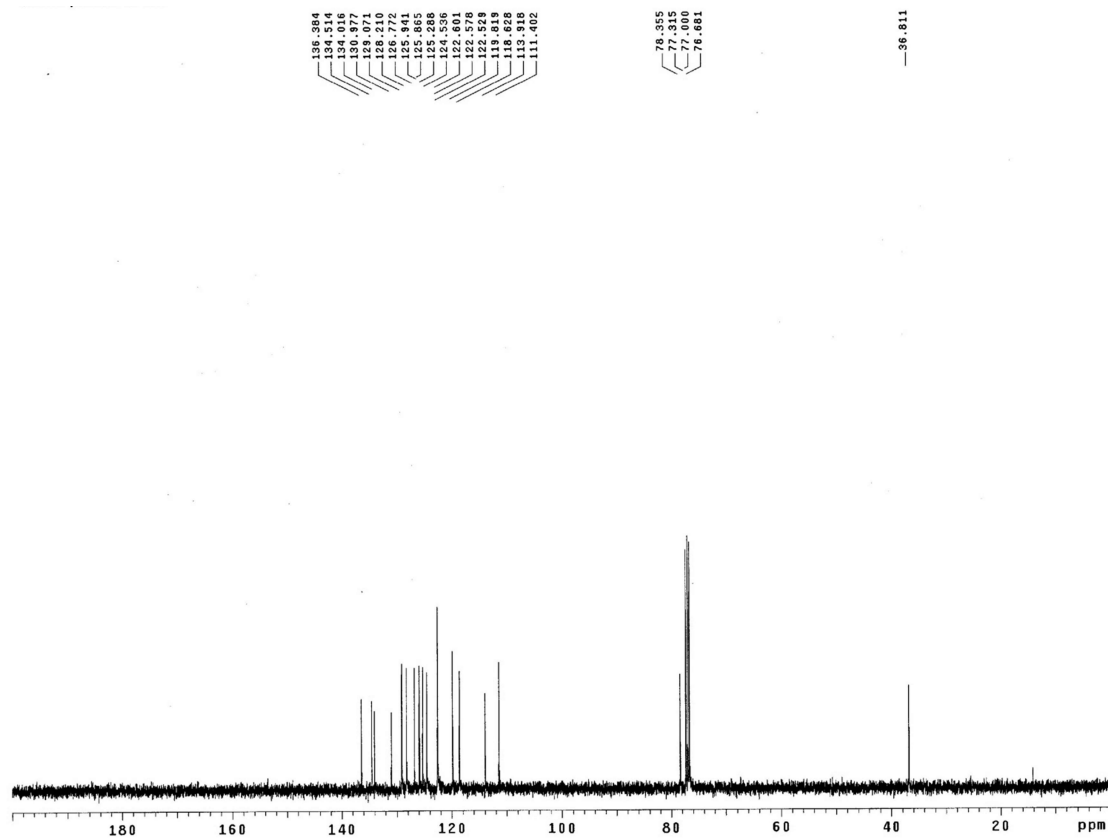

$^1\text{H}$  NMR ( $\text{CDCl}_3$ , 400 MHz) spectrum of compound **10bb** (table 6, entry 10)

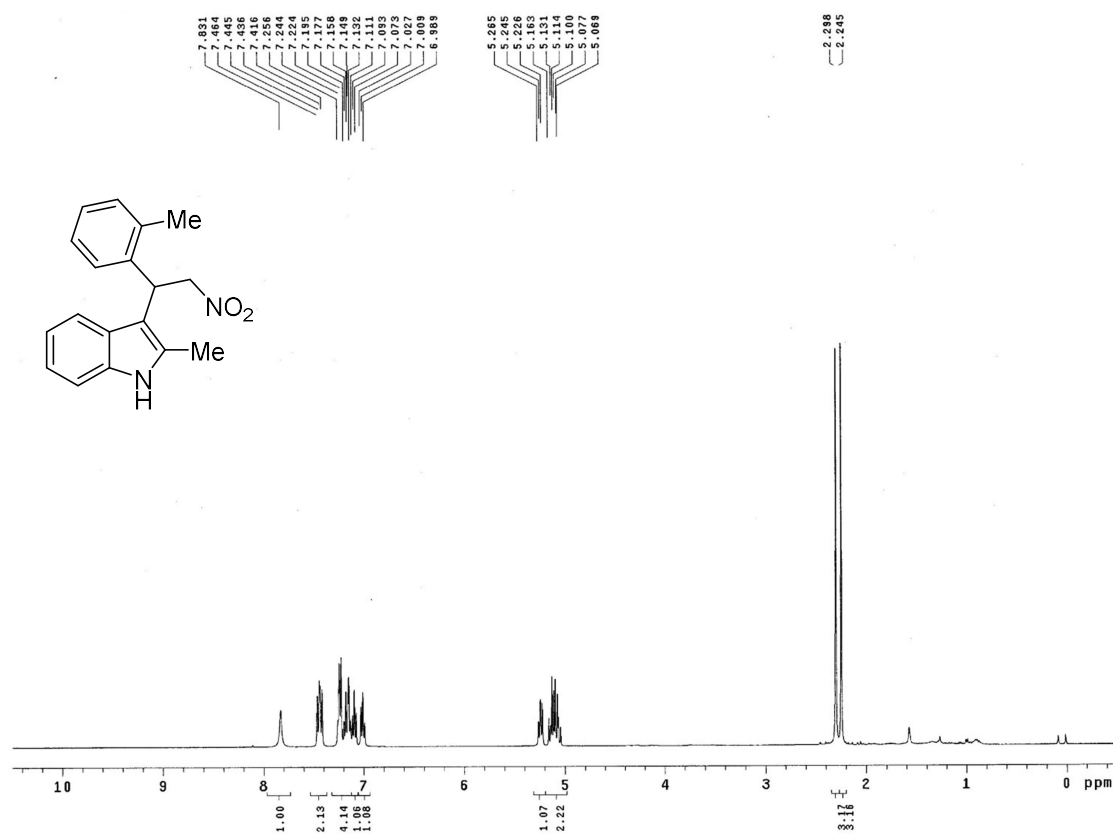

$^{13}\text{C}$  NMR ( $\text{CDCl}_3$ , 100 MHz) spectrum of compound **10bb**

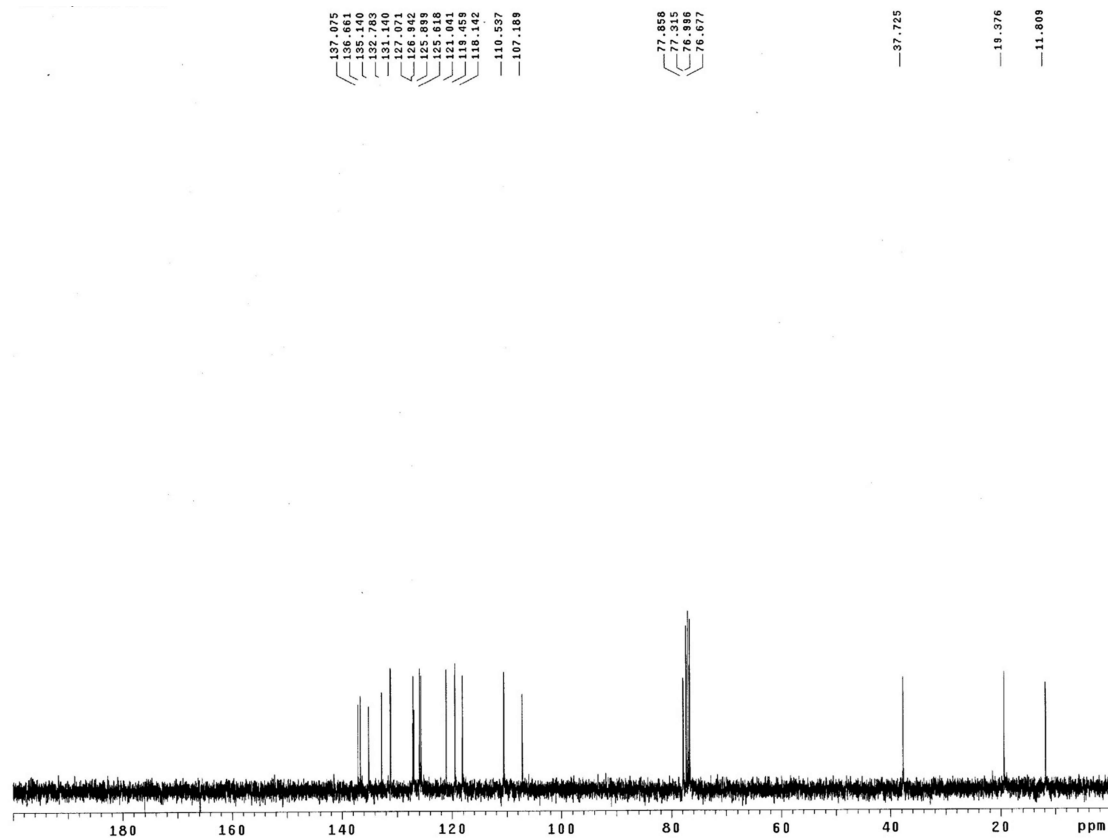

$^1\text{H}$  NMR ( $\text{CDCl}_3$ , 400 MHz) spectrum of compound **10eb** (table 6, entry 11)

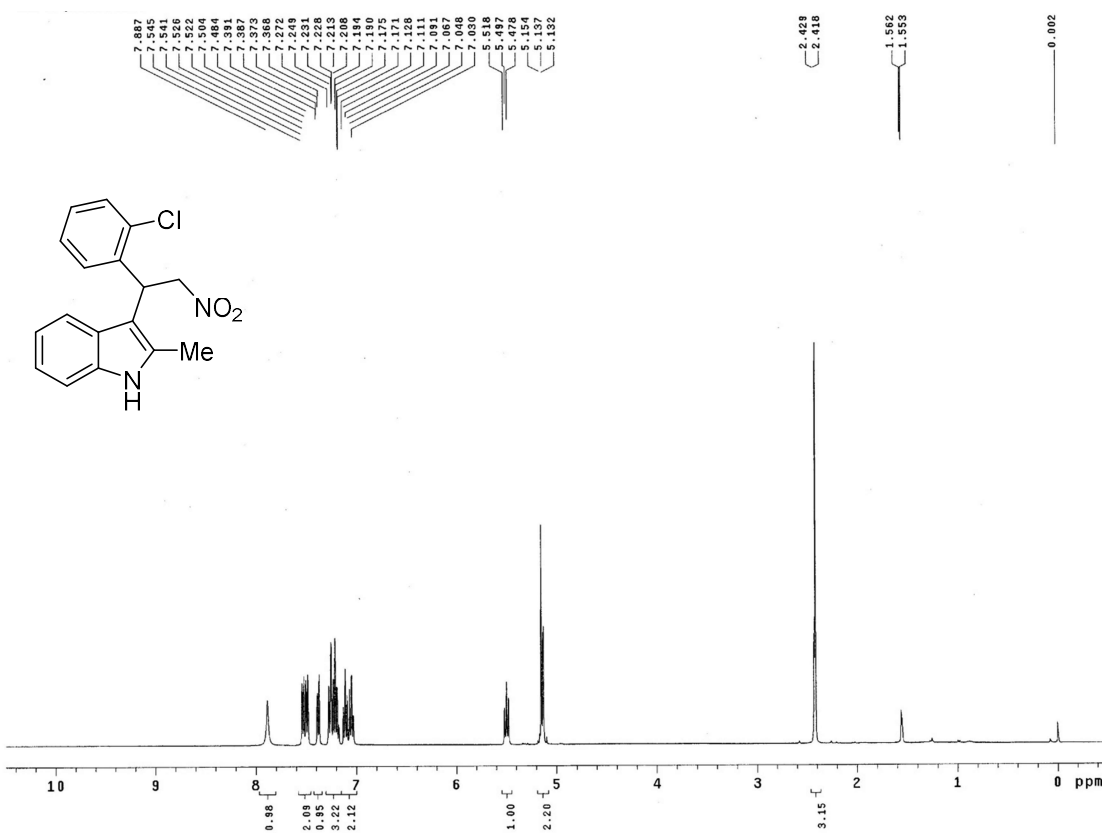

$^{13}\text{C}$  NMR ( $\text{CDCl}_3$ , 100 MHz) spectrum of compound **10eb**

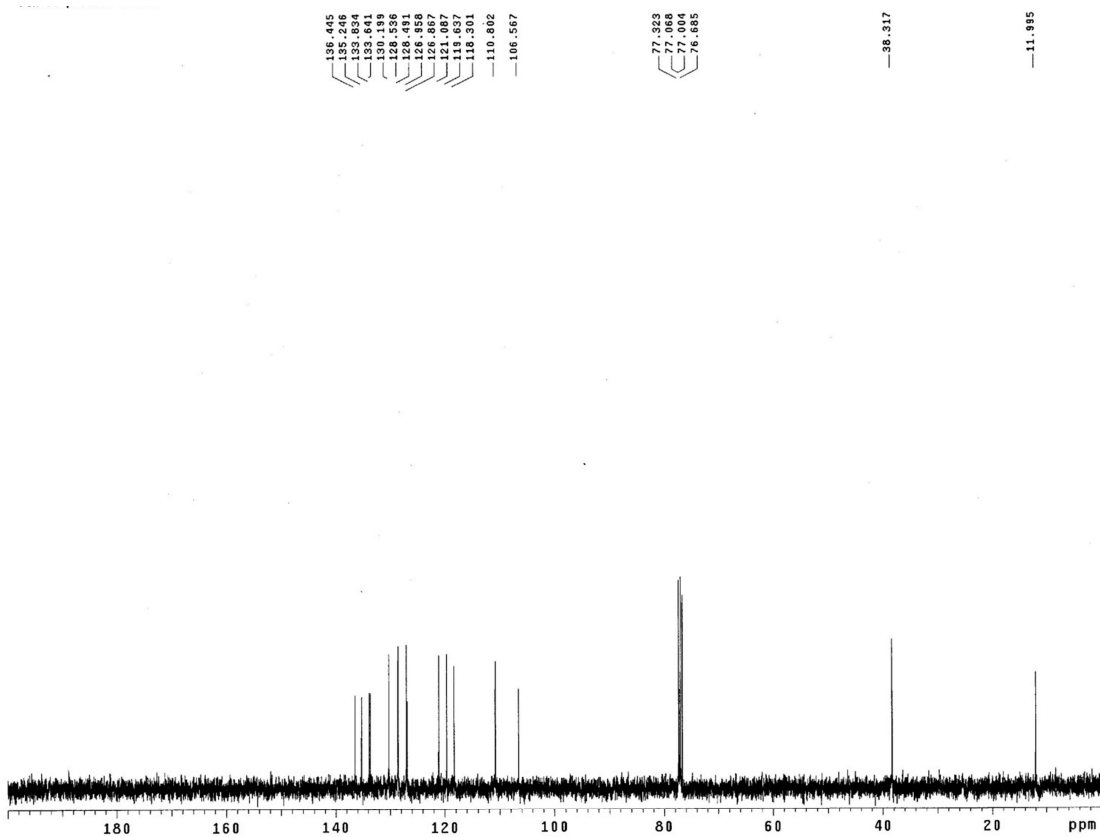

$^1\text{H}$  NMR ( $\text{CDCl}_3$ , 400 MHz) spectrum of compound **10jb** (table 6, entry 12)

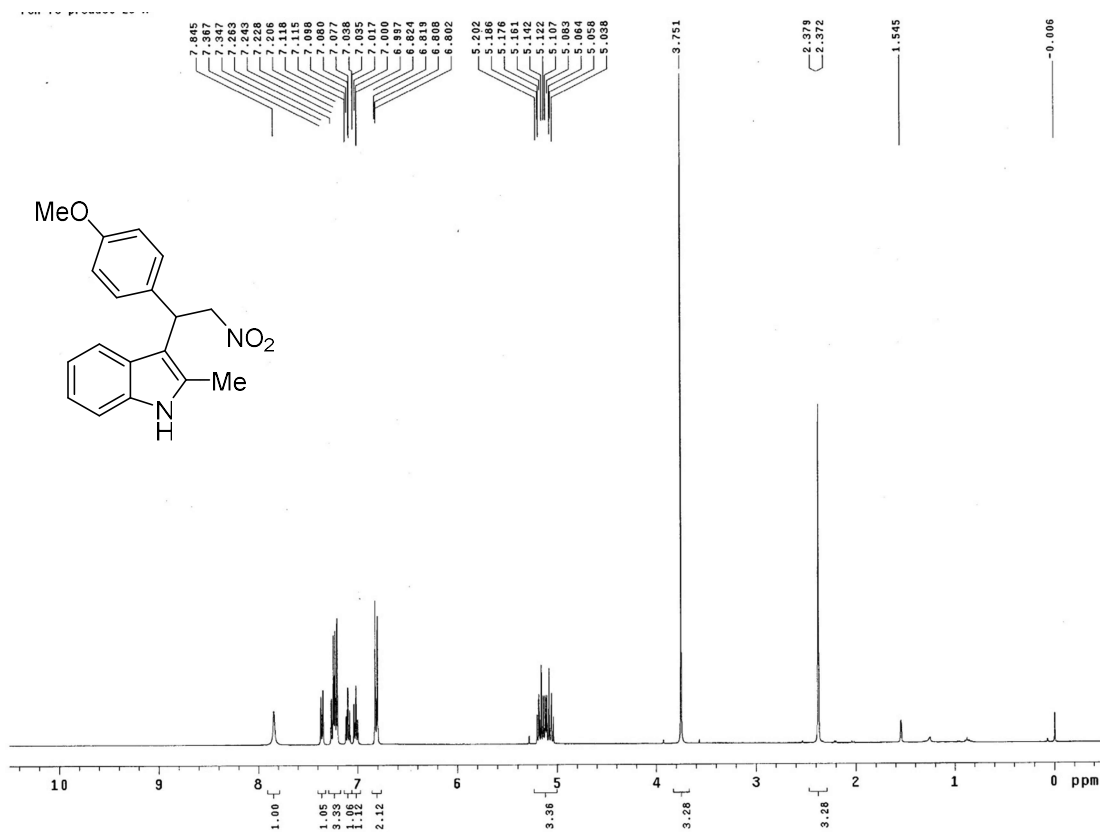

$^{13}\text{C}$  NMR ( $\text{CDCl}_3$ , 100 MHz) spectrum of compound **10jb**

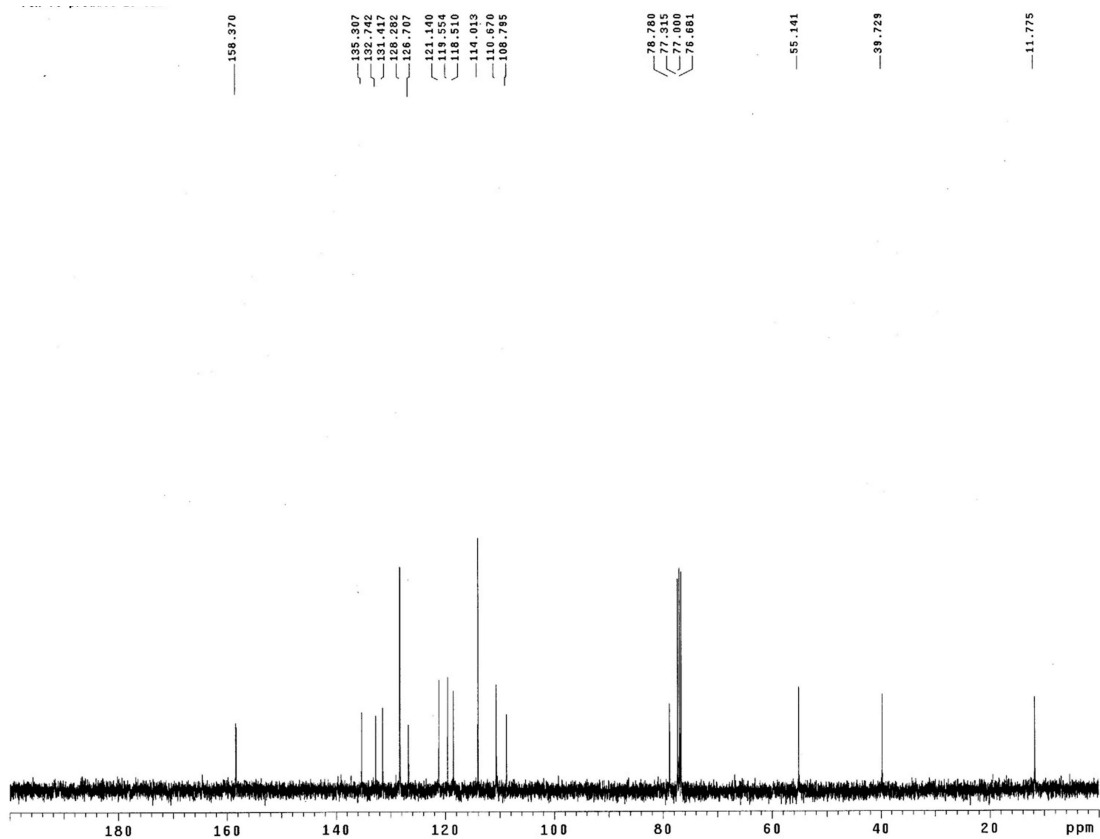

$^1\text{H}$  NMR ( $\text{CDCl}_3$ , 400 MHz) spectrum of compound **10kb** (table 6, entry 13)

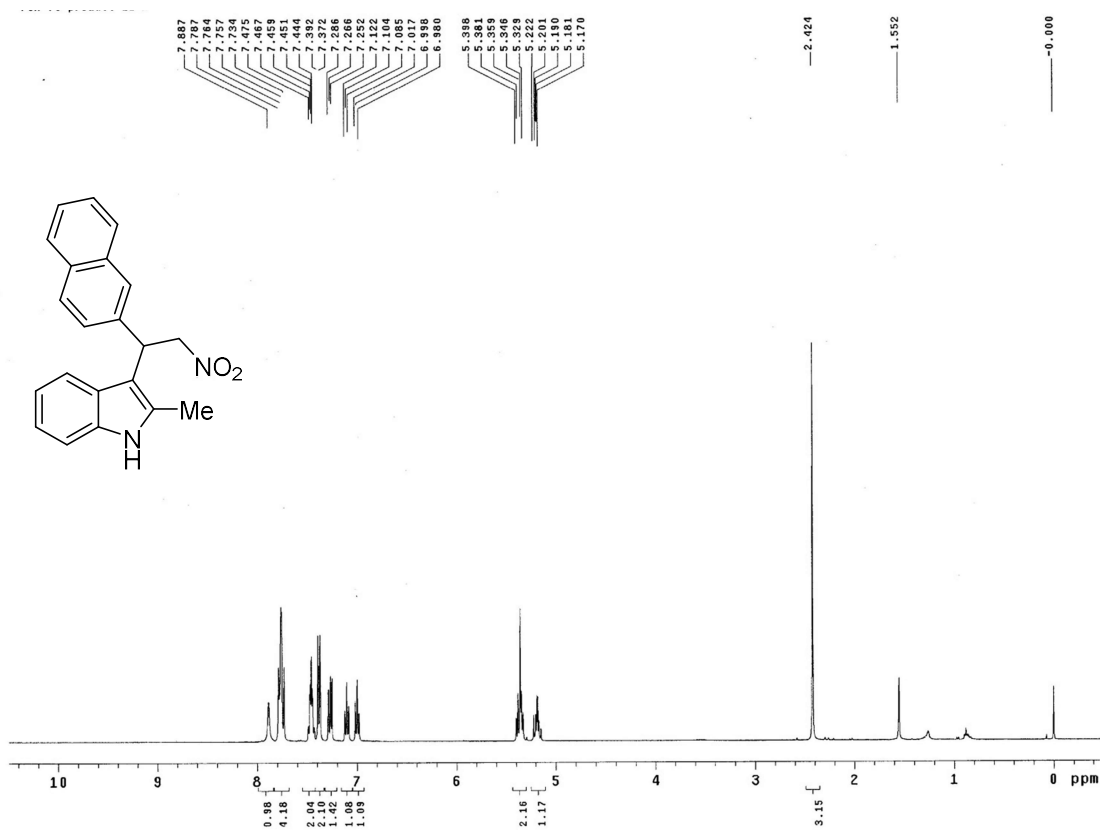

$^{13}\text{C}$  NMR ( $\text{CDCl}_3$ , 100 MHz) spectrum of compound **10kb**

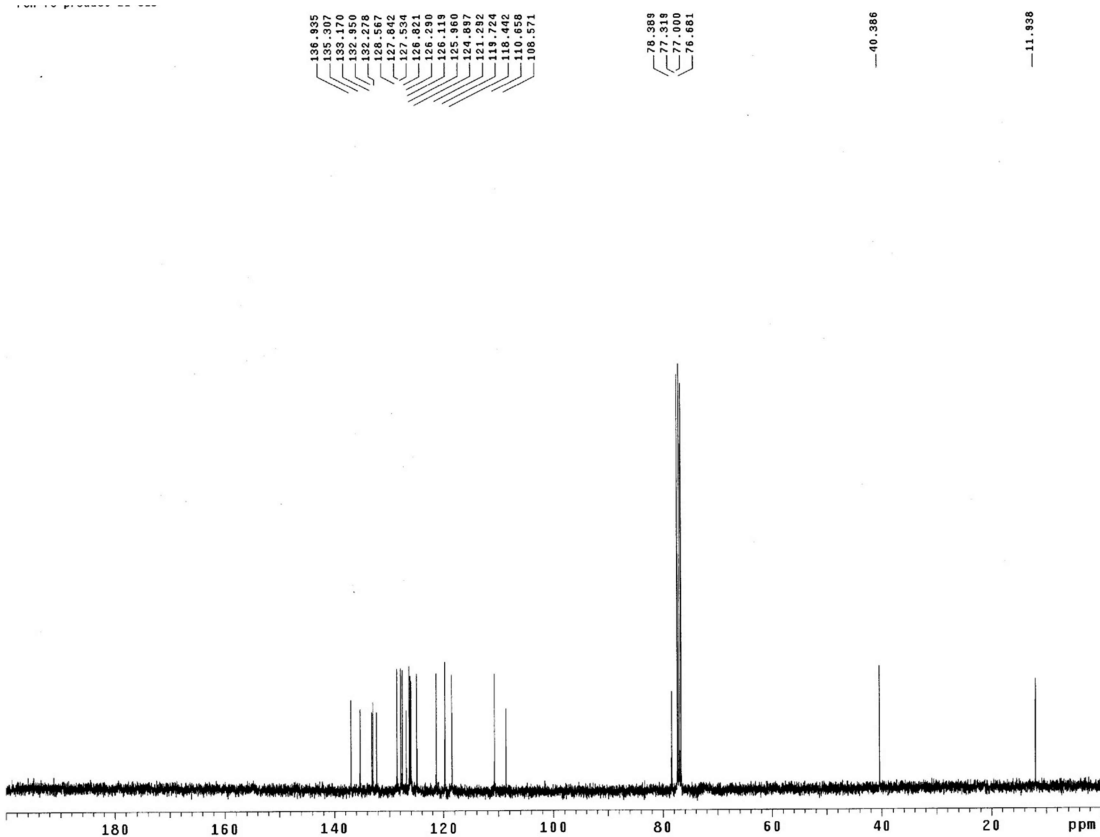

$^1\text{H}$  NMR ( $\text{CDCl}_3$ , 400 MHz) spectrum of compound **10hb** (table 6, entry 14)

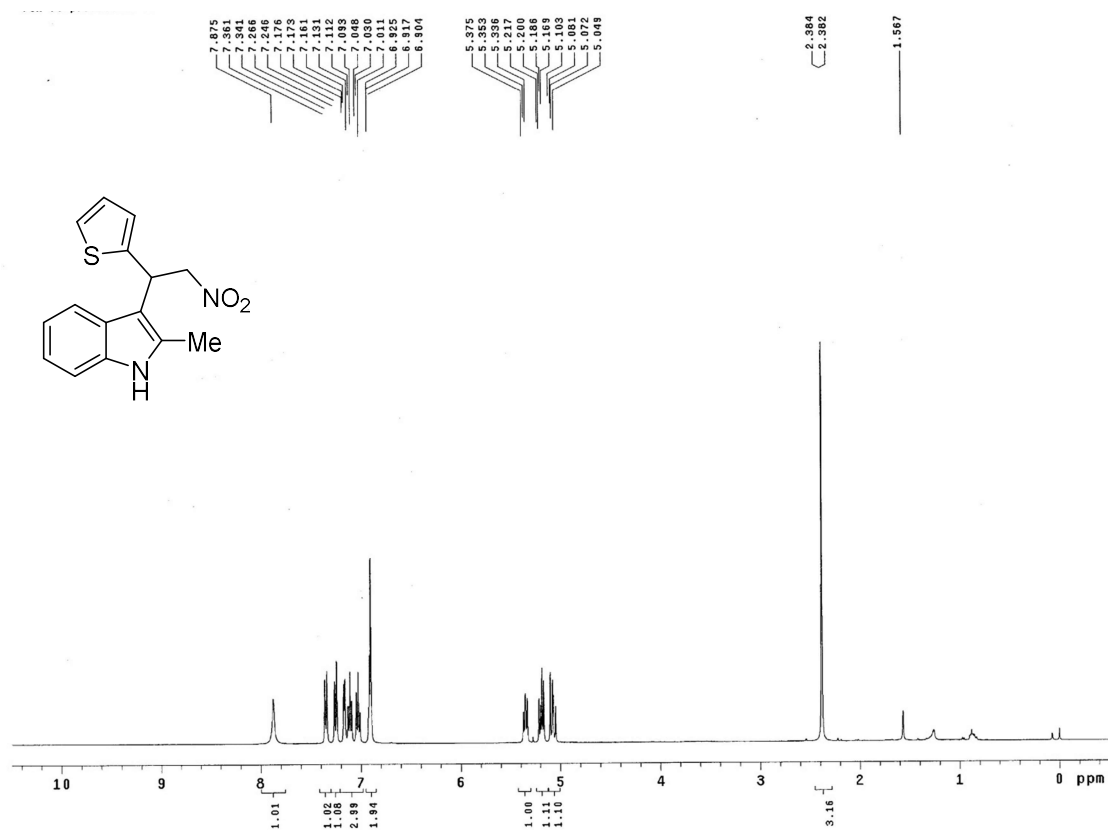

$^{13}\text{C}$  NMR ( $\text{CDCl}_3$ , 100 MHz) spectrum of compound **10hb**

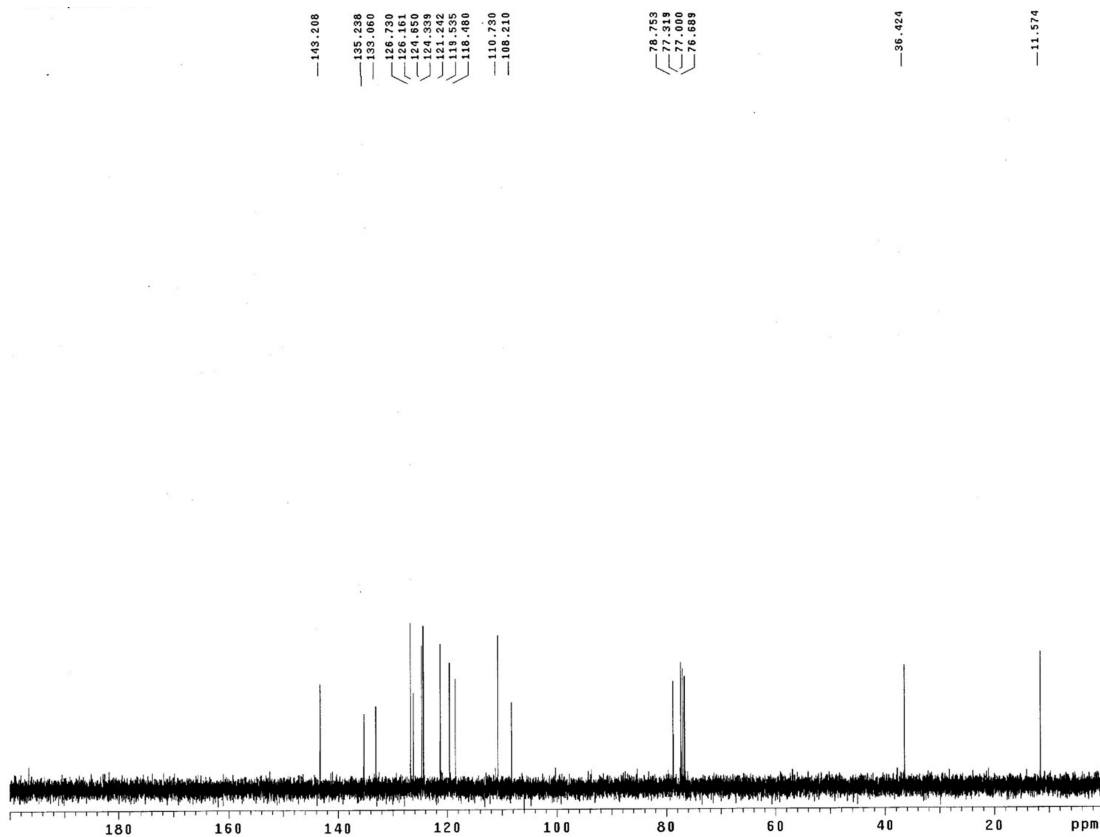



$^1\text{H}$  NMR ( $\text{CDCl}_3$ , 400 MHz) spectrum of compound **10lb** (table 6, entry 15)

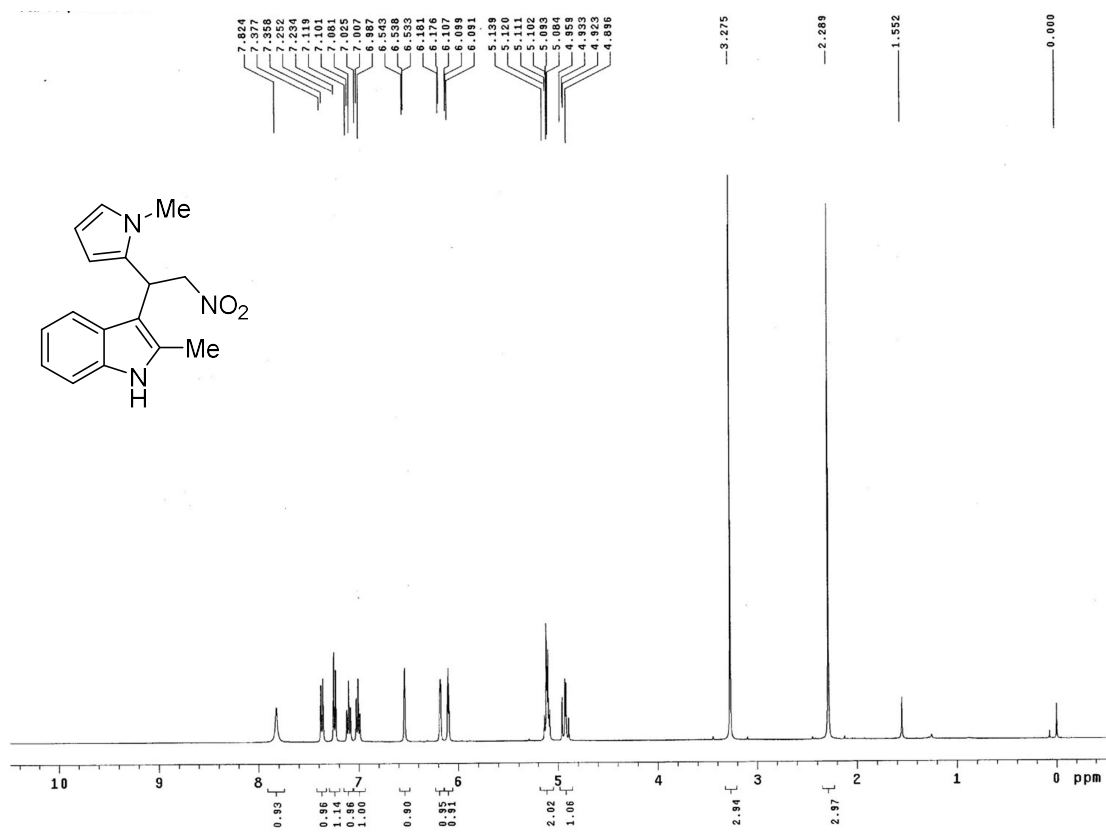

$^{13}\text{C}$  NMR ( $\text{CDCl}_3$ , 100 MHz) spectrum of compound **10lb**

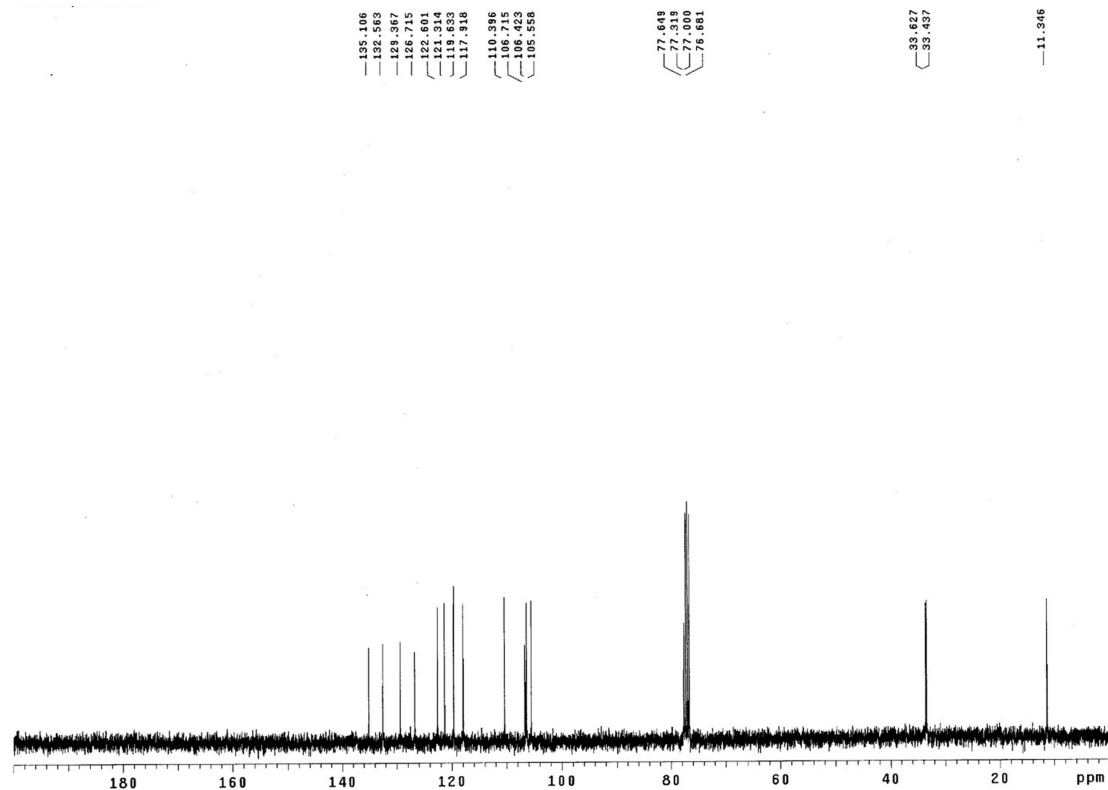

$^1\text{H}$  NMR ( $\text{CDCl}_3$ , 400 MHz) spectrum of compound **10mb** (table 6, entry 16)

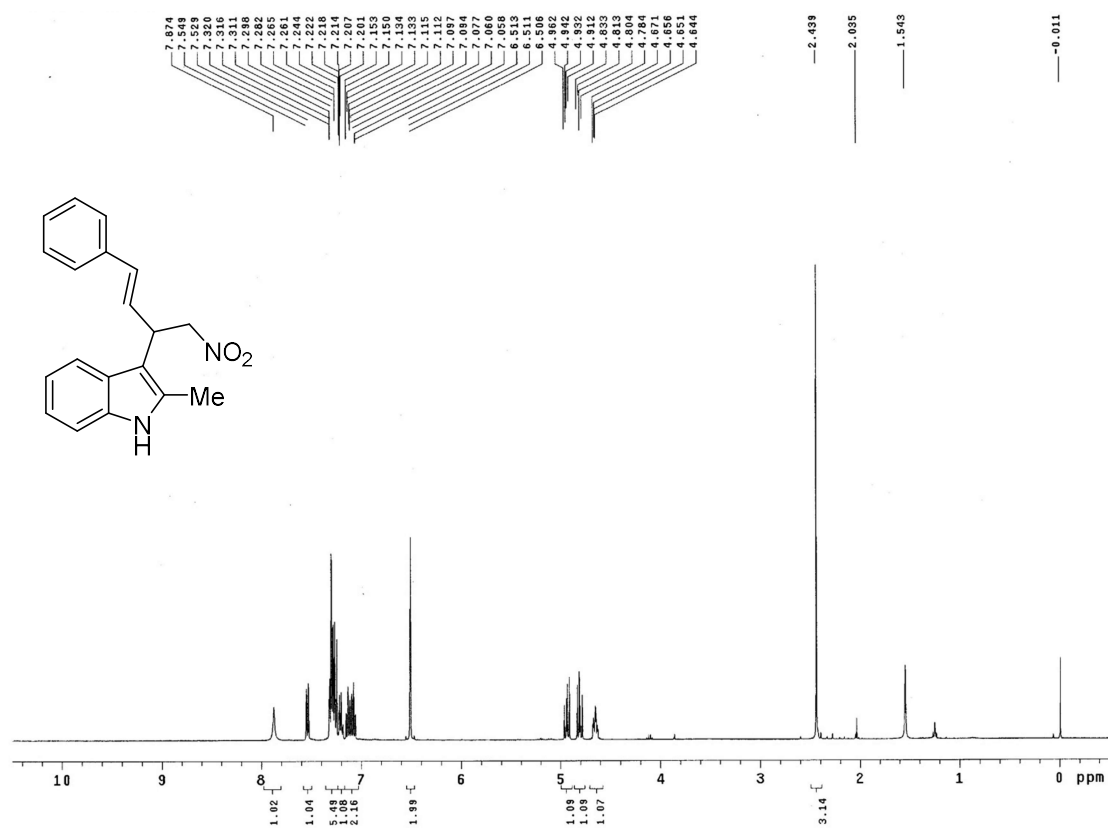

$^{13}\text{C}$  NMR ( $\text{CDCl}_3$ , 100 MHz) spectrum of compound **10mb**

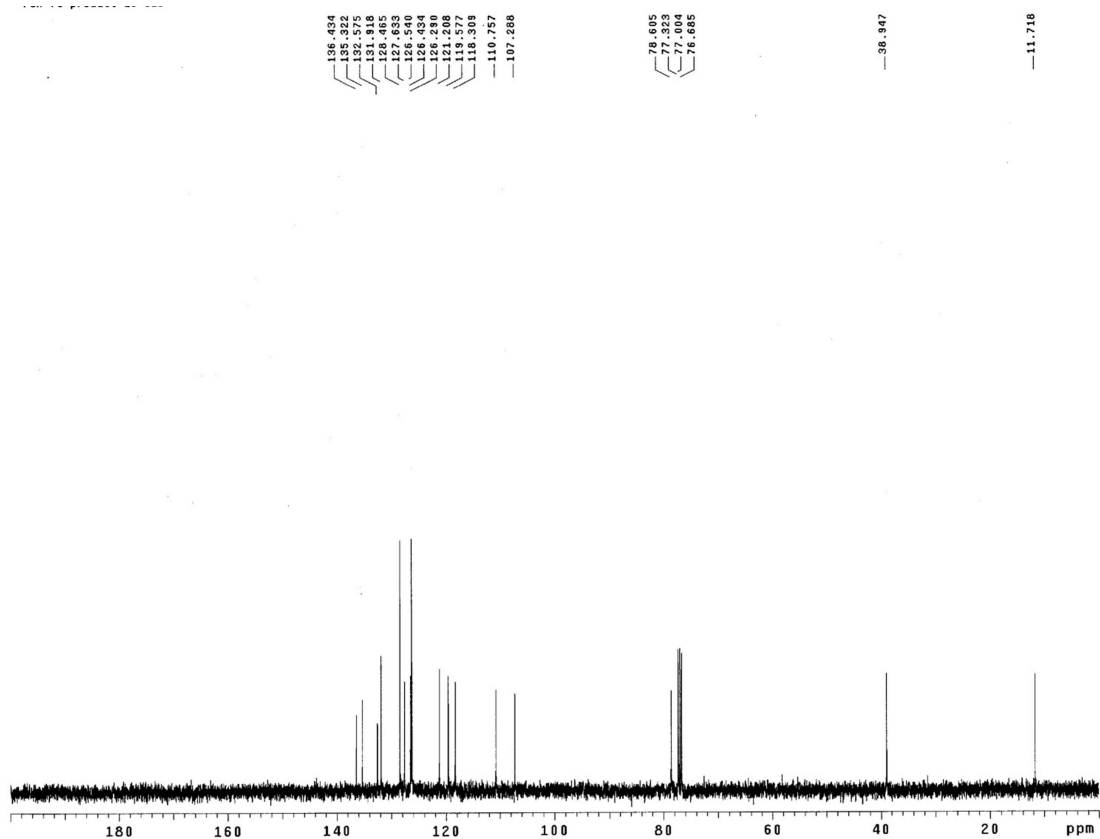

$^1\text{H}$  NMR ( $\text{CDCl}_3$ , 400 MHz) spectrum of compound **10ab** (table 6, entry 17)

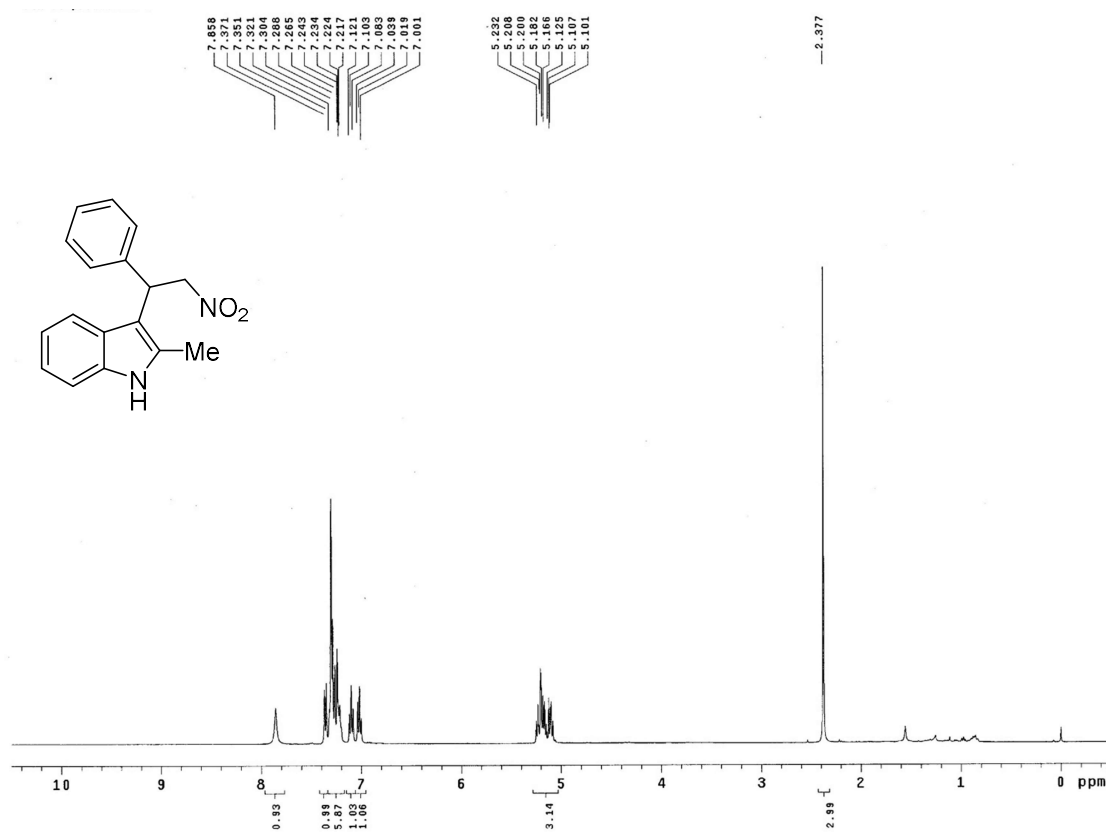

$^{13}\text{C}$  NMR ( $\text{CDCl}_3$ , 100 MHz) spectrum of compound **10ab**

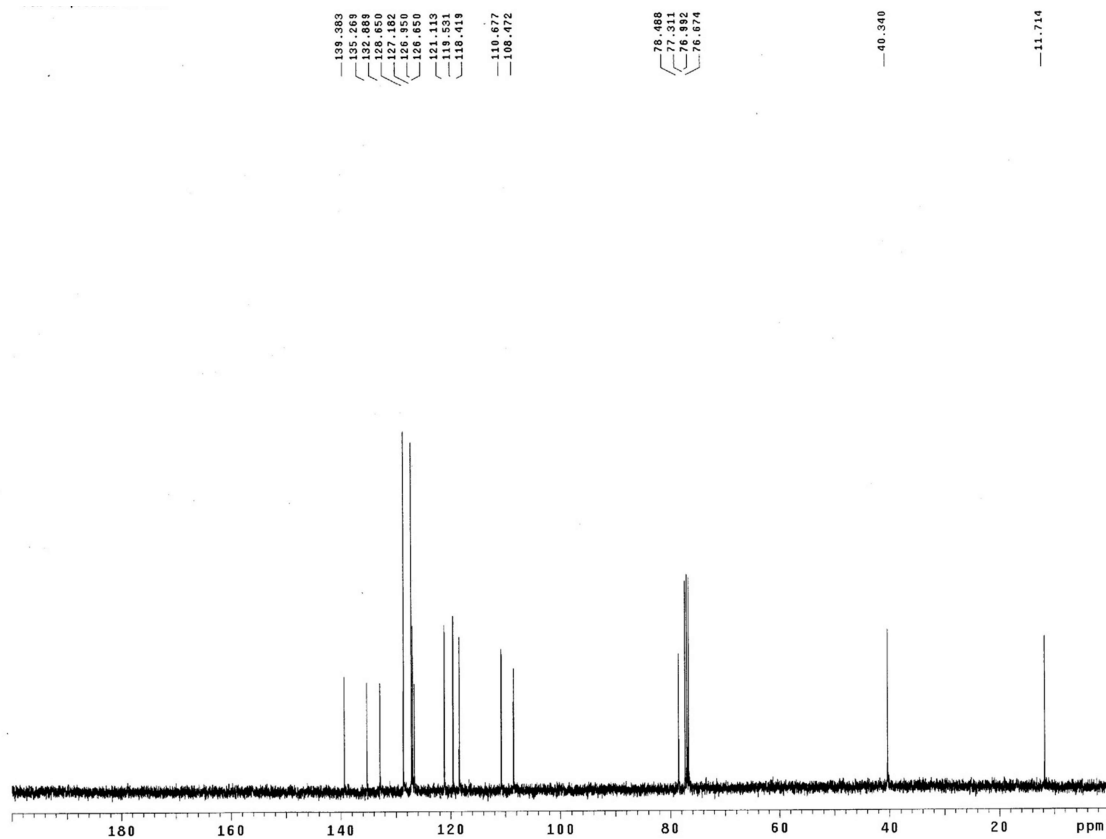

$^1\text{H}$  NMR ( $\text{CDCl}_3$ , 400 MHz) spectrum of compound **10ac** (table 6, entry 18)

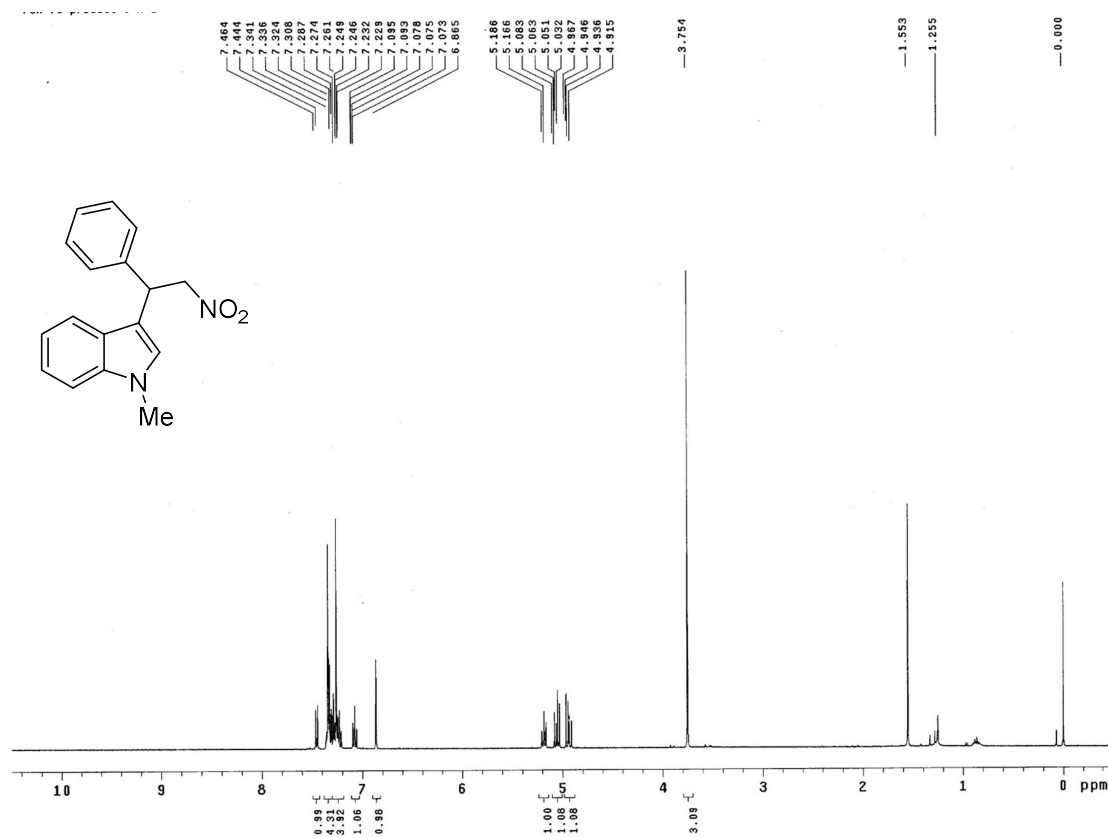

$^{13}\text{C}$  NMR ( $\text{CDCl}_3$ , 100 MHz) spectrum of compound **10ac**

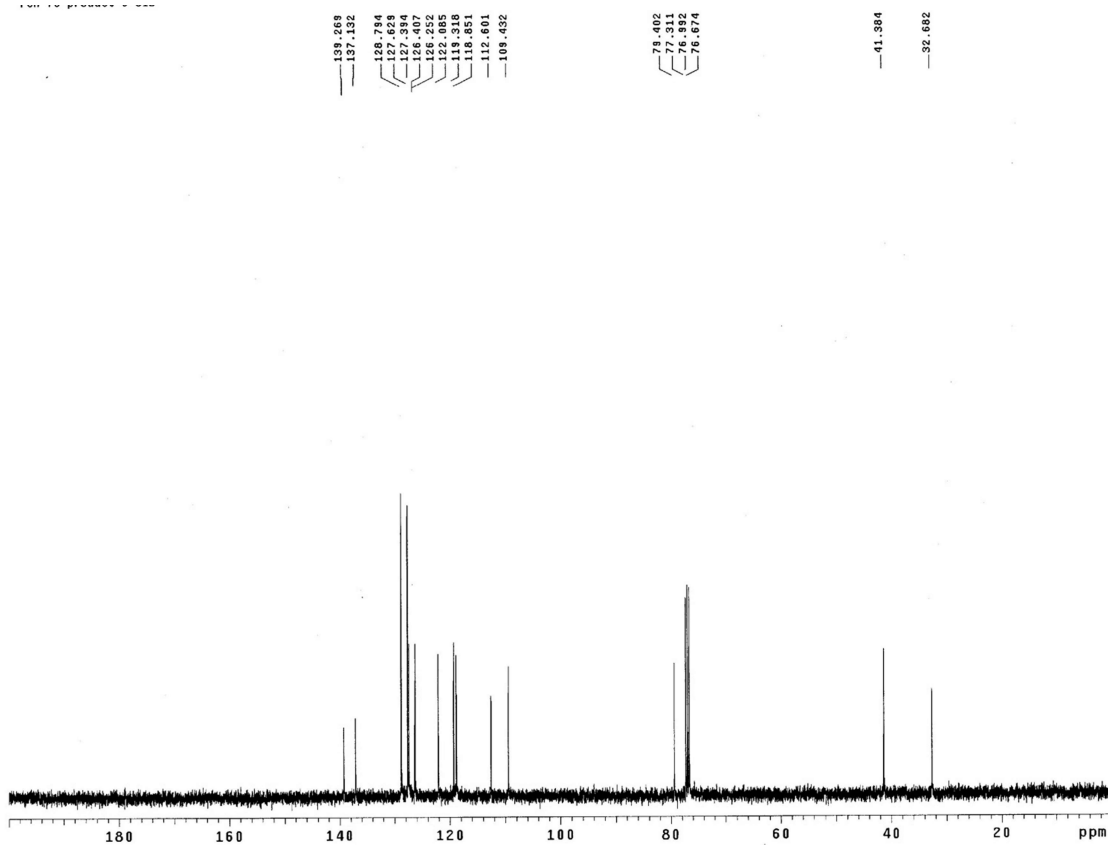

$^1\text{H}$  NMR ( $\text{CDCl}_3$ , 400 MHz) spectrum of compound **10ad** (table 6, entry 19)

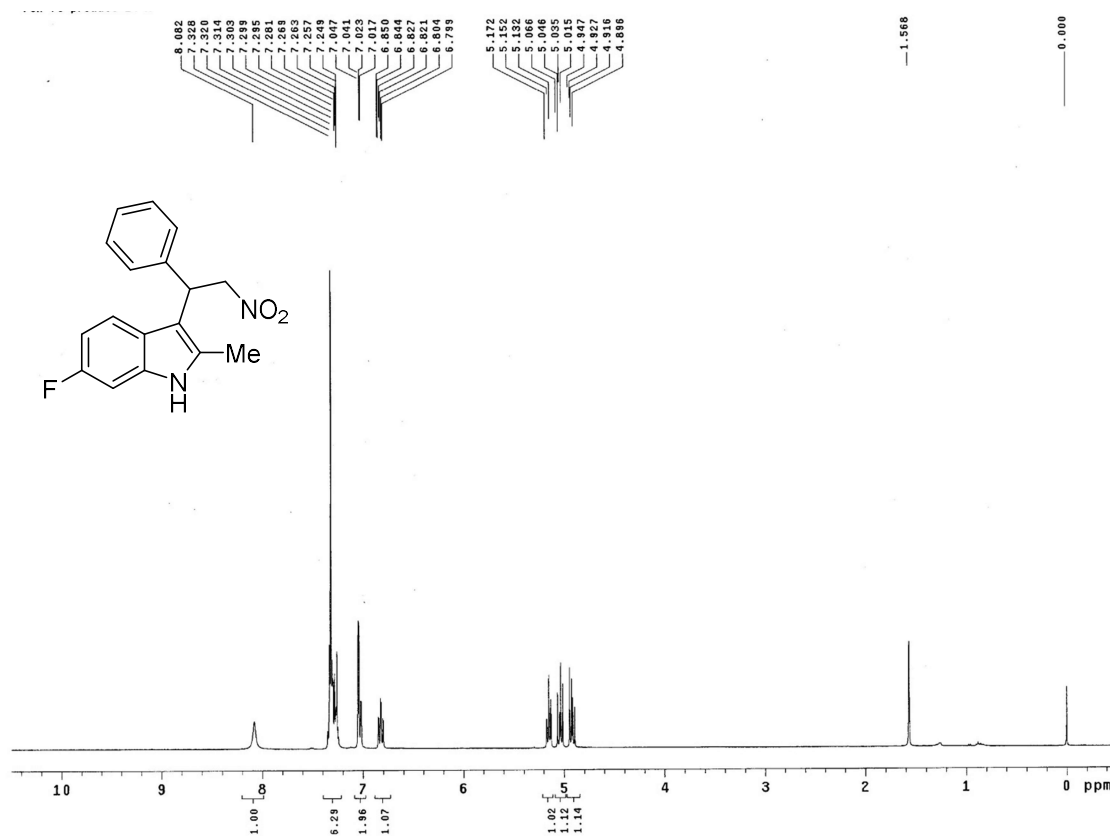

$^{13}\text{C}$  NMR ( $\text{CDCl}_3$ , 100 MHz) spectrum of compound **10ad**

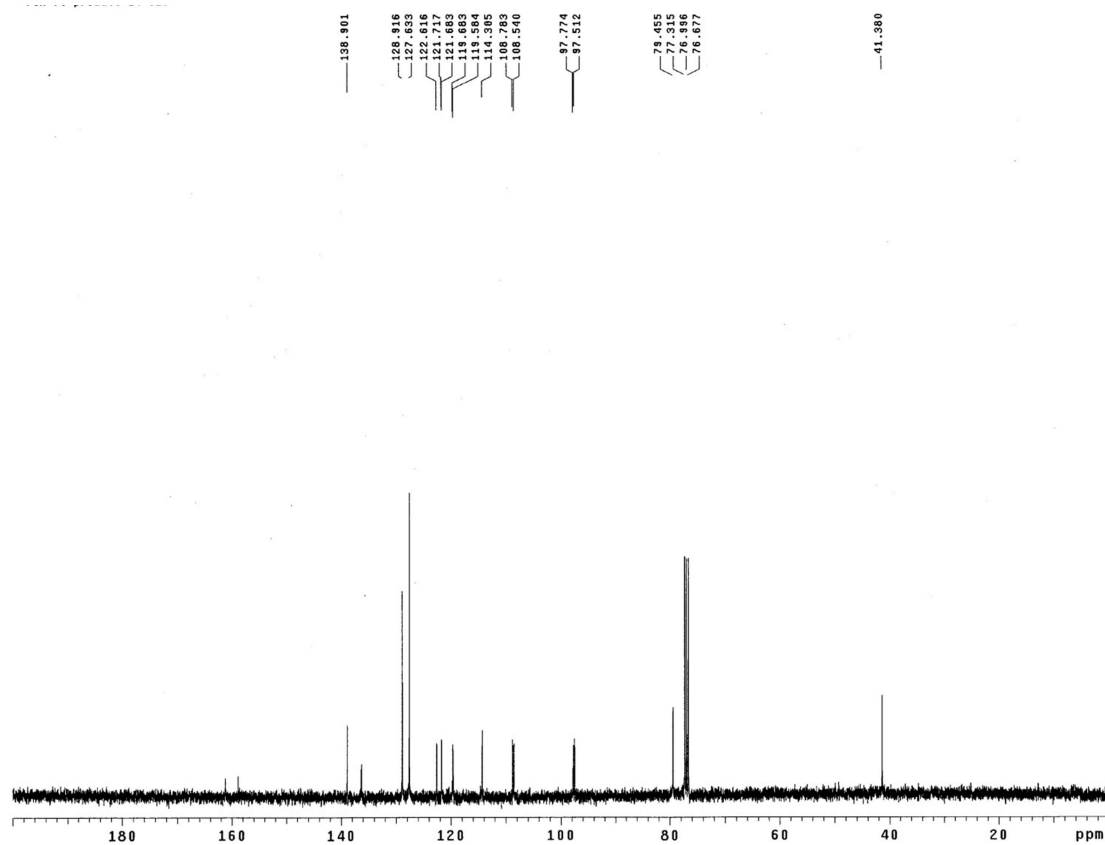

$^1\text{H}$  NMR ( $\text{CDCl}_3$ , 400 MHz) spectrum of compound **10ae** (table 6, entry 20)

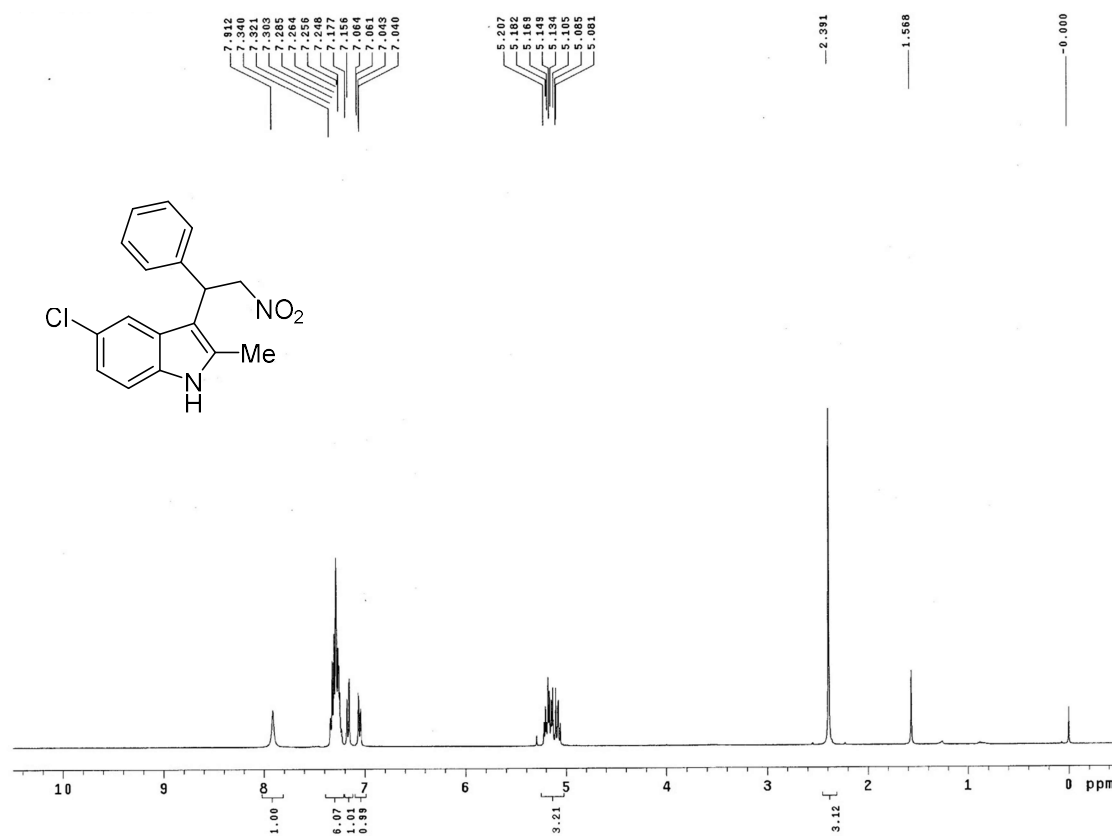

$^{13}\text{C}$  NMR ( $\text{CDCl}_3$ , 100 MHz) spectrum of compound **10ae**

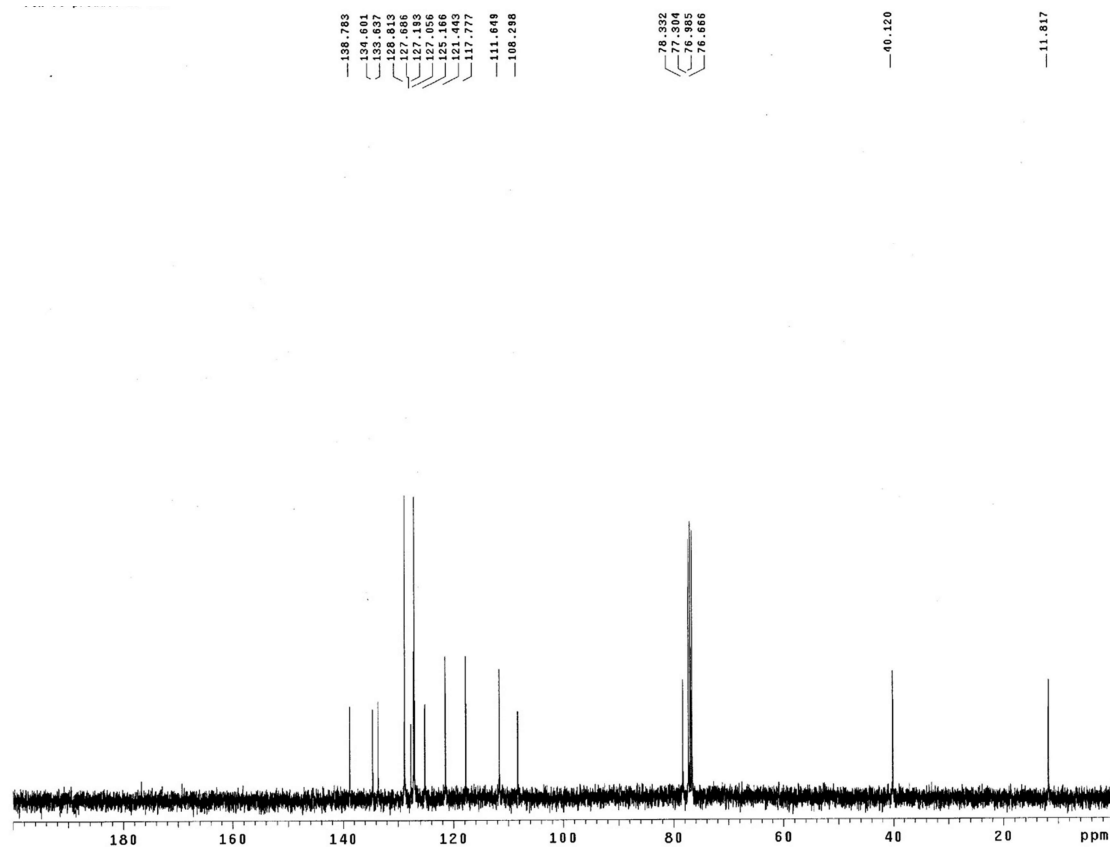

$^1\text{H}$  NMR ( $\text{CDCl}_3$ , 400 MHz) spectrum of compound **10af** (table 6, entry 21)

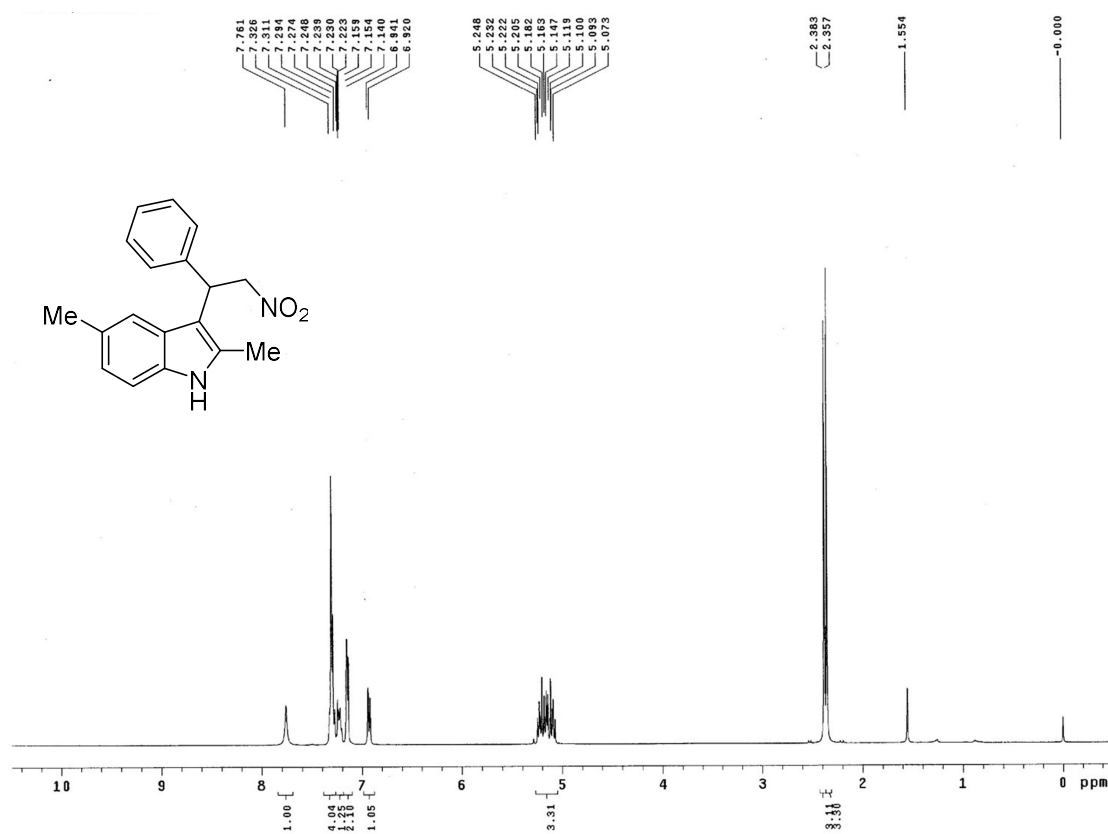

$^{13}\text{C}$  NMR ( $\text{CDCl}_3$ , 100 MHz) spectrum of compound **10af**

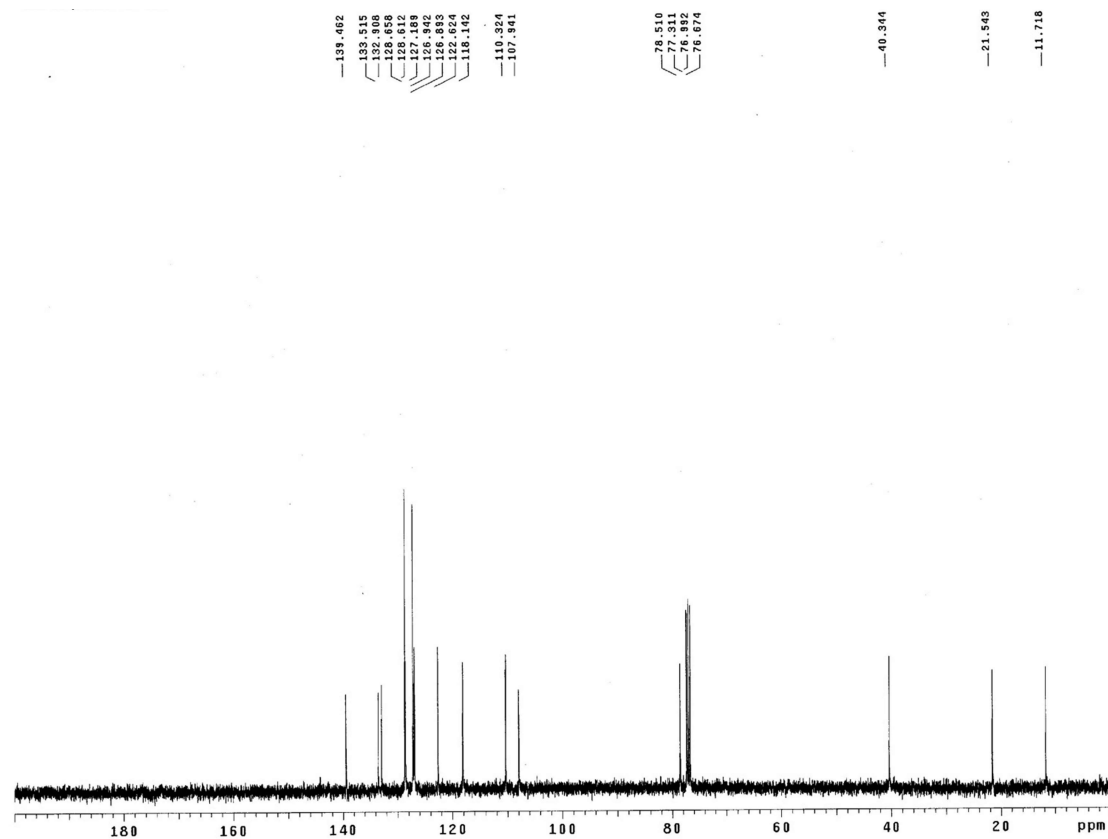

#### 4. X ray crystal structure of complexes 1c–Ag and 1c–Pd:

##### 4.1 X ray crystal structure of 1c–Ag complex:

Table 1. Crystal data and structure refinement for 1lag\_sq.

|                                   |                                                                                                              |                 |
|-----------------------------------|--------------------------------------------------------------------------------------------------------------|-----------------|
| Identification code               | 1lag_sq                                                                                                      |                 |
| Empirical formula                 | C <sub>66</sub> H <sub>64</sub> Ag <sub>2</sub> F <sub>12</sub> N <sub>8</sub> O <sub>4</sub> P <sub>2</sub> |                 |
| Formula weight                    | 1538.93                                                                                                      |                 |
| Temperature                       | 150(2) K                                                                                                     |                 |
| Wavelength                        | 0.71073 Å                                                                                                    |                 |
| Crystal system                    | monoclinic                                                                                                   |                 |
| Space group                       | P 2 <sub>1</sub> /c                                                                                          |                 |
| Unit cell dimensions              | a = 17.7431(6) Å                                                                                             | α = 90°.        |
|                                   | b = 15.6583(6) Å                                                                                             | β = 95.567(3)°. |
|                                   | c = 26.3446(8) Å                                                                                             | γ = 90°.        |
| Volume                            | 7284.7(4) Å <sup>3</sup>                                                                                     |                 |
| Z                                 | 4                                                                                                            |                 |
| Density (calculated)              | 1.403 Mg/m <sup>3</sup>                                                                                      |                 |
| Absorption coefficient            | 0.661 mm <sup>-1</sup>                                                                                       |                 |
| F(000)                            | 3120                                                                                                         |                 |
| Crystal size                      | 0.43 x 0.35 x 0.12 mm <sup>3</sup>                                                                           |                 |
| Theta range for data collection   | 2.816 to 29.183°.                                                                                            |                 |
| Index ranges                      | -23 ≤ h ≤ 22, -20 ≤ k ≤ 21, -34 ≤ l ≤ 23                                                                     |                 |
| Reflections collected             | 38390                                                                                                        |                 |
| Independent reflections           | 16974 [R(int) = 0.0433]                                                                                      |                 |
| Completeness to theta = 25.242°   | 99.9 %                                                                                                       |                 |
| Absorption correction             | Semi-empirical from equivalents                                                                              |                 |
| Max. and min. transmission        | 1.00000 and 0.88916                                                                                          |                 |
| Refinement method                 | Full-matrix least-squares on F <sup>2</sup>                                                                  |                 |
| Data / restraints / parameters    | 16974 / 2 / 893                                                                                              |                 |
| Goodness-of-fit on F <sup>2</sup> | 1.014                                                                                                        |                 |
| Final R indices [I > 2σ(I)]       | R1 = 0.0733, wR2 = 0.1780                                                                                    |                 |
| R indices (all data)              | R1 = 0.1100, wR2 = 0.2013                                                                                    |                 |
| Extinction coefficient            | n/a                                                                                                          |                 |
| Largest diff. peak and hole       | 2.229 and -1.440 e.Å <sup>-3</sup>                                                                           |                 |



Table 2. Atomic coordinates ( $\times 10^4$ ) and equivalent isotropic displacement parameters ( $\text{\AA}^2 \times 10^3$ ) for 1lag\_sq.  $U(\text{eq})$  is defined as one third of the trace of the orthogonalized  $U^{ij}$  tensor.

|       | x       | y        | z       | $U(\text{eq})$ |
|-------|---------|----------|---------|----------------|
| Ag(1) | 7559(1) | -2112(1) | 2433(1) | 32(1)          |
| Ag(2) | 7384(1) | 796(1)   | 2447(1) | 36(1)          |
| O(1)  | 4852(4) | 520(3)   | 615(2)  | 70(2)          |
| O(2)  | 9272(3) | -1843(3) | 436(2)  | 65(1)          |
| O(3)  | 6143(3) | -2256(3) | 4473(2) | 55(1)          |
| N(1)  | 5726(3) | 679(3)   | 2708(2) | 31(1)          |
| N(2)  | 6493(2) | 737(3)   | 3402(2) | 29(1)          |
| N(3)  | 8875(2) | -2024(3) | 3288(2) | 28(1)          |
| N(4)  | 9316(2) | -1957(3) | 2556(2) | 30(1)          |
| N(5)  | 5808(2) | -2170(3) | 2344(2) | 28(1)          |
| N(6)  | 6205(2) | -2208(3) | 1595(2) | 29(1)          |
| N(7)  | 8256(2) | 832(3)   | 1488(2) | 32(1)          |
| N(8)  | 9044(3) | 856(3)   | 2171(2) | 37(1)          |
| C(1)  | 5148(5) | 1105(5)  | 271(3)  | 68(2)          |
| C(2)  | 5070(4) | 621(4)   | 1129(2) | 45(2)          |
| C(3)  | 4785(4) | 13(4)    | 1448(3) | 51(2)          |
| C(4)  | 4981(4) | 43(4)    | 1967(2) | 43(1)          |
| C(5)  | 5474(3) | 674(3)   | 2172(2) | 30(1)          |
| C(6)  | 5727(3) | 1297(3)  | 1854(2) | 32(1)          |
| C(7)  | 5533(3) | 1273(4)  | 1330(2) | 37(1)          |
| C(8)  | 6471(3) | 746(3)   | 2889(2) | 28(1)          |
| C(9)  | 5268(3) | 621(3)   | 3110(2) | 32(1)          |
| C(10) | 4491(3) | 545(3)   | 3123(2) | 39(1)          |
| C(11) | 4228(4) | 491(4)   | 3601(3) | 48(2)          |
| C(12) | 4728(4) | 532(4)   | 4046(3) | 46(2)          |
| C(13) | 5508(4) | 619(3)   | 4038(2) | 38(1)          |
| C(14) | 5765(3) | 659(3)   | 3556(2) | 32(1)          |
| C(15) | 7183(3) | 857(3)   | 3751(2) | 33(1)          |
| C(16) | 7493(4) | 53(4)    | 4013(2) | 39(1)          |
| C(17) | 7756(3) | -638(4)  | 3663(2) | 35(1)          |
| C(18) | 8175(3) | -1351(4) | 3978(2) | 35(1)          |

|       |          |          |         |       |
|-------|----------|----------|---------|-------|
| C(19) | 8342(3)  | -2145(3) | 3678(2) | 29(1) |
| C(20) | 8664(3)  | -2017(3) | 2782(2) | 29(1) |
| C(21) | 9664(3)  | -1961(3) | 3387(2) | 31(1) |
| C(22) | 10131(3) | -1978(4) | 3840(2) | 39(1) |
| C(23) | 10910(3) | -1936(4) | 3796(3) | 47(2) |
| C(24) | 11199(3) | -1868(4) | 3327(3) | 45(2) |
| C(25) | 10726(3) | -1861(4) | 2874(2) | 38(1) |
| C(26) | 9949(3)  | -1914(3) | 2919(2) | 30(1) |
| C(27) | 9327(3)  | -1970(3) | 2010(2) | 32(1) |
| C(28) | 8931(3)  | -2586(4) | 1725(2) | 35(1) |
| C(29) | 8895(3)  | -2569(4) | 1192(2) | 42(1) |
| C(30) | 9273(4)  | -1935(4) | 950(2)  | 44(2) |
| C(31) | 9701(4)  | -1336(4) | 1240(2) | 50(2) |
| C(32) | 9724(4)  | -1346(4) | 1766(2) | 42(1) |
| C(33) | 8865(5)  | -2481(5) | 127(3)  | 73(2) |
| C(34) | 5834(5)  | -1588(5) | 4764(2) | 65(2) |
| C(35) | 6001(4)  | -2209(4) | 3953(2) | 39(1) |
| C(36) | 6356(3)  | -2840(4) | 3683(2) | 36(1) |
| C(37) | 6270(3)  | -2837(4) | 3155(2) | 33(1) |
| C(38) | 5837(3)  | -2203(3) | 2889(2) | 29(1) |
| C(39) | 5464(3)  | -1603(4) | 3162(2) | 35(1) |
| C(40) | 5540(3)  | -1599(4) | 3693(2) | 37(1) |
| C(41) | 6446(3)  | -2185(3) | 2096(2) | 28(1) |
| C(42) | 5159(3)  | -2176(3) | 2002(2) | 25(1) |
| C(43) | 4392(3)  | -2156(3) | 2071(2) | 31(1) |
| C(44) | 3888(3)  | -2168(3) | 1629(2) | 38(1) |
| C(45) | 4146(3)  | -2213(3) | 1146(2) | 37(1) |
| C(46) | 4912(3)  | -2232(3) | 1076(2) | 32(1) |
| C(47) | 5412(3)  | -2208(3) | 1520(2) | 28(1) |
| C(48) | 6715(3)  | -2281(4) | 1191(2) | 35(1) |
| C(49) | 6792(4)  | -1444(4) | 900(2)  | 46(2) |
| C(50) | 7146(3)  | -697(4)  | 1220(2) | 40(1) |
| C(51) | 7339(4)  | 42(4)    | 881(2)  | 47(2) |
| C(52) | 7555(3)  | 862(4)   | 1145(2) | 43(1) |
| C(53) | 8294(3)  | 831(3)   | 1998(2) | 35(1) |
| C(54) | 8982(3)  | 849(3)   | 1321(2) | 35(1) |

|        |          |          |          |        |
|--------|----------|----------|----------|--------|
| C(55)  | 9227(4)  | 846(4)   | 837(3)   | 42(1)  |
| C(56)  | 10008(4) | 854(4)   | 808(3)   | 51(2)  |
| C(57)  | 10514(4) | 870(4)   | 1247(3)  | 53(2)  |
| C(58)  | 10267(3) | 887(4)   | 1734(3)  | 46(2)  |
| C(59)  | 9485(3)  | 861(3)   | 1760(2)  | 37(1)  |
| C(60)  | 9320(4)  | 876(4)   | 2706(3)  | 51(2)  |
| O(4)   | 10033(5) | 760(5)   | 4261(3)  | 65(2)  |
| C(61)  | 9047(7)  | 1380(7)  | 3036(5)  | 45(3)  |
| C(62)  | 9285(8)  | 1339(11) | 3553(5)  | 52(4)  |
| C(63)  | 9831(6)  | 759(6)   | 3737(4)  | 47(2)  |
| C(64)  | 10167(6) | 239(6)   | 3408(3)  | 48(2)  |
| C(66)  | 10705(9) | 171(7)   | 4505(5)  | 145(9) |
| C(65)  | 9928(6)  | 274(6)   | 2882(4)  | 43(2)  |
| O(4')  | 9536(14) | 1247(16) | 4294(8)  | 72(7)  |
| C(61') | 8815(18) | 1680(30) | 2982(15) | 37(8)  |
| C(62') | 8936(16) | 1784(19) | 3505(11) | 41(6)  |
| C(63') | 9398(19) | 1260(30) | 3778(12) | 38(9)  |
| C(64') | 9780(20) | 560(20)  | 3501(14) | 48(2)  |
| C(65') | 9618(19) | 460(20)  | 3001(13) | 43(2)  |
| C(66') | 9160(30) | 1850(20) | 4590(17) | 145(9) |
| P      | 7712(1)  | -191(2)  | 7579(1)  | 104(1) |
| F(1)   | 7199(3)  | -911(4)  | 7277(3)  | 133(3) |
| F(2)   | 7857(3)  | -800(4)  | 8042(3)  | 110(2) |
| F(3)   | 8272(4)  | 440(4)   | 7821(4)  | 160(4) |
| F(4)   | 7559(4)  | 367(5)   | 7067(3)  | 142(3) |
| F(5)   | 8430(4)  | -600(6)  | 7326(3)  | 156(3) |
| F(6)   | 6980(3)  | 168(5)   | 7805(3)  | 143(3) |
| P(2)   | 6768(2)  | 1553(2)  | 5404(1)  | 77(1)  |
| F(7)   | 6417(5)  | 669(4)   | 5267(3)  | 145(3) |
| F(8)   | 6181(8)  | 1953(5)  | 4994(3)  | 218(6) |
| F(9)   | 7166(7)  | 2352(7)  | 5580(4)  | 230(6) |
| F(10)  | 7300(5)  | 1110(7)  | 5841(3)  | 180(4) |
| F(11)  | 6169(4)  | 1705(7)  | 5798(3)  | 172(4) |
| F(12)  | 7242(7)  | 1452(8)  | 4974(4)  | 251(7) |

---

Table 3. Bond lengths [Å] and angles [°] for 11ag\_sq.

|             |          |
|-------------|----------|
| Ag(1)-C(20) | 2.089(5) |
| Ag(1)-C(41) | 2.087(5) |
| Ag(2)-C(8)  | 2.087(5) |
| Ag(2)-C(53) | 2.093(6) |
| O(1)-C(2)   | 1.380(7) |
| O(1)-C(1)   | 1.424(9) |
| O(2)-C(30)  | 1.360(7) |
| O(2)-C(33)  | 1.438(9) |
| O(3)-C(35)  | 1.372(6) |
| O(3)-C(34)  | 1.437(8) |
| N(1)-C(8)   | 1.365(7) |
| N(1)-C(9)   | 1.400(7) |
| N(1)-C(5)   | 1.440(7) |
| N(2)-C(8)   | 1.347(6) |
| N(2)-C(14)  | 1.396(7) |
| N(2)-C(15)  | 1.471(7) |
| N(3)-C(20)  | 1.348(6) |
| N(3)-C(21)  | 1.403(6) |
| N(3)-C(19)  | 1.476(6) |
| N(4)-C(20)  | 1.356(6) |
| N(4)-C(26)  | 1.403(6) |
| N(4)-C(27)  | 1.441(6) |
| N(5)-C(41)  | 1.362(6) |
| N(5)-C(42)  | 1.392(6) |
| N(5)-C(38)  | 1.433(6) |
| N(6)-C(41)  | 1.349(6) |
| N(6)-C(47)  | 1.403(6) |
| N(6)-C(48)  | 1.467(6) |
| N(7)-C(53)  | 1.339(7) |
| N(7)-C(54)  | 1.401(6) |
| N(7)-C(52)  | 1.466(7) |
| N(8)-C(53)  | 1.363(7) |
| N(8)-C(59)  | 1.397(7) |
| N(8)-C(60)  | 1.447(8) |

|             |           |
|-------------|-----------|
| C(2)-C(3)   | 1.396(9)  |
| C(2)-C(7)   | 1.384(9)  |
| C(3)-C(4)   | 1.380(8)  |
| C(4)-C(5)   | 1.394(8)  |
| C(5)-C(6)   | 1.389(7)  |
| C(6)-C(7)   | 1.390(8)  |
| C(9)-C(10)  | 1.387(8)  |
| C(9)-C(14)  | 1.401(8)  |
| C(10)-C(11) | 1.388(9)  |
| C(11)-C(12) | 1.400(10) |
| C(12)-C(13) | 1.394(9)  |
| C(13)-C(14) | 1.390(8)  |
| C(15)-C(16) | 1.514(8)  |
| C(16)-C(17) | 1.525(7)  |
| C(17)-C(18) | 1.538(7)  |
| C(18)-C(19) | 1.517(8)  |
| C(21)-C(26) | 1.380(7)  |
| C(21)-C(22) | 1.385(7)  |
| C(22)-C(23) | 1.398(8)  |
| C(23)-C(24) | 1.388(9)  |
| C(24)-C(25) | 1.390(8)  |
| C(25)-C(26) | 1.398(7)  |
| C(27)-C(28) | 1.372(8)  |
| C(27)-C(32) | 1.397(8)  |
| C(28)-C(29) | 1.401(8)  |
| C(29)-C(30) | 1.387(9)  |
| C(30)-C(31) | 1.389(9)  |
| C(31)-C(32) | 1.383(8)  |
| C(35)-C(40) | 1.393(8)  |
| C(35)-C(36) | 1.402(8)  |
| C(36)-C(37) | 1.385(7)  |
| C(37)-C(38) | 1.400(7)  |
| C(38)-C(39) | 1.388(7)  |
| C(39)-C(40) | 1.391(7)  |
| C(42)-C(43) | 1.392(7)  |
| C(42)-C(47) | 1.387(7)  |

|               |           |
|---------------|-----------|
| C(43)-C(44)   | 1.398(8)  |
| C(44)-C(45)   | 1.395(8)  |
| C(45)-C(46)   | 1.388(8)  |
| C(46)-C(47)   | 1.398(7)  |
| C(48)-C(49)   | 1.531(8)  |
| C(49)-C(50)   | 1.540(9)  |
| C(50)-C(51)   | 1.521(8)  |
| C(51)-C(52)   | 1.492(9)  |
| C(54)-C(59)   | 1.390(8)  |
| C(54)-C(55)   | 1.389(8)  |
| C(55)-C(56)   | 1.394(9)  |
| C(56)-C(57)   | 1.395(10) |
| C(57)-C(58)   | 1.395(10) |
| C(58)-C(59)   | 1.396(8)  |
| C(60)-C(65')  | 1.11(4)   |
| C(60)-C(61)   | 1.302(14) |
| C(60)-C(65)   | 1.473(13) |
| C(60)-C(61')  | 1.74(3)   |
| O(4)-C(63)    | 1.392(12) |
| O(4)-C(66)    | 1.593(15) |
| C(61)-C(62)   | 1.389(19) |
| C(62)-C(63)   | 1.381(19) |
| C(63)-C(64)   | 1.368(14) |
| C(64)-C(65)   | 1.411(13) |
| O(4')-C(63')  | 1.36(4)   |
| O(4')-C(66')  | 1.430(19) |
| C(61')-C(62') | 1.38(5)   |
| C(62')-C(63') | 1.32(5)   |
| C(63')-C(64') | 1.51(6)   |
| C(64')-C(65') | 1.33(5)   |
| P-F(3)        | 1.499(7)  |
| P-F(2)        | 1.549(6)  |
| P-F(5)        | 1.625(8)  |
| P-F(4)        | 1.609(7)  |
| P-F(6)        | 1.583(8)  |
| P-F(1)        | 1.612(8)  |

|            |           |
|------------|-----------|
| P(2)-F(8)  | 1.557(10) |
| P(2)-F(12) | 1.482(7)  |
| P(2)-F(9)  | 1.489(7)  |
| P(2)-F(10) | 1.578(8)  |
| P(2)-F(11) | 1.576(7)  |
| P(2)-F(7)  | 1.546(6)  |

|                   |          |
|-------------------|----------|
| C(20)-Ag(1)-C(41) | 178.6(2) |
| C(8)-Ag(2)-C(53)  | 179.2(2) |
| C(2)-O(1)-C(1)    | 117.7(6) |
| C(30)-O(2)-C(33)  | 116.2(6) |
| C(35)-O(3)-C(34)  | 116.9(5) |
| C(8)-N(1)-C(9)    | 110.8(5) |
| C(8)-N(1)-C(5)    | 122.9(4) |
| C(9)-N(1)-C(5)    | 126.4(5) |
| C(8)-N(2)-C(14)   | 110.8(4) |
| C(8)-N(2)-C(15)   | 124.4(4) |
| C(14)-N(2)-C(15)  | 124.6(4) |
| C(20)-N(3)-C(21)  | 111.2(4) |
| C(20)-N(3)-C(19)  | 123.7(4) |
| C(21)-N(3)-C(19)  | 125.0(4) |
| C(20)-N(4)-C(26)  | 111.3(4) |
| C(20)-N(4)-C(27)  | 122.2(4) |
| C(26)-N(4)-C(27)  | 126.4(4) |
| C(41)-N(5)-C(42)  | 111.2(4) |
| C(41)-N(5)-C(38)  | 122.0(4) |
| C(42)-N(5)-C(38)  | 126.6(4) |
| C(41)-N(6)-C(47)  | 110.8(4) |
| C(41)-N(6)-C(48)  | 123.6(4) |
| C(47)-N(6)-C(48)  | 125.4(4) |
| C(53)-N(7)-C(54)  | 110.9(5) |
| C(53)-N(7)-C(52)  | 125.2(5) |
| C(54)-N(7)-C(52)  | 123.8(5) |
| C(53)-N(8)-C(59)  | 110.1(5) |
| C(53)-N(8)-C(60)  | 123.6(5) |
| C(59)-N(8)-C(60)  | 126.3(5) |

|                   |          |
|-------------------|----------|
| O(1)-C(2)-C(3)    | 115.4(6) |
| O(1)-C(2)-C(7)    | 124.0(6) |
| C(3)-C(2)-C(7)    | 120.6(6) |
| C(2)-C(3)-C(4)    | 120.2(6) |
| C(5)-C(4)-C(3)    | 119.7(6) |
| C(4)-C(5)-C(6)    | 119.5(5) |
| C(4)-C(5)-N(1)    | 120.5(5) |
| C(6)-C(5)-N(1)    | 120.0(5) |
| C(5)-C(6)-C(7)    | 121.2(5) |
| C(2)-C(7)-C(6)    | 118.7(6) |
| N(2)-C(8)-N(1)    | 106.4(4) |
| N(2)-C(8)-Ag(2)   | 127.8(4) |
| N(1)-C(8)-Ag(2)   | 125.8(4) |
| N(1)-C(9)-C(10)   | 132.6(5) |
| N(1)-C(9)-C(14)   | 105.5(5) |
| C(10)-C(9)-C(14)  | 121.9(5) |
| C(11)-C(10)-C(9)  | 116.8(6) |
| C(10)-C(11)-C(12) | 121.0(6) |
| C(11)-C(12)-C(13) | 122.7(6) |
| C(14)-C(13)-C(12) | 115.7(6) |
| N(2)-C(14)-C(13)  | 131.6(6) |
| N(2)-C(14)-C(9)   | 106.5(5) |
| C(13)-C(14)-C(9)  | 121.9(5) |
| N(2)-C(15)-C(16)  | 115.0(4) |
| C(17)-C(16)-C(15) | 115.6(5) |
| C(16)-C(17)-C(18) | 110.5(4) |
| C(17)-C(18)-C(19) | 115.0(4) |
| N(3)-C(19)-C(18)  | 115.3(4) |
| N(4)-C(20)-N(3)   | 105.5(4) |
| N(4)-C(20)-Ag(1)  | 128.0(4) |
| N(3)-C(20)-Ag(1)  | 126.4(4) |
| C(26)-C(21)-N(3)  | 106.3(4) |
| C(26)-C(21)-C(22) | 122.1(5) |
| N(3)-C(21)-C(22)  | 131.5(5) |
| C(21)-C(22)-C(23) | 116.2(5) |
| C(22)-C(23)-C(24) | 122.1(5) |



|                   |          |
|-------------------|----------|
| C(25)-C(24)-C(23) | 121.3(5) |
| C(24)-C(25)-C(26) | 116.5(5) |
| C(21)-C(26)-N(4)  | 105.6(4) |
| C(21)-C(26)-C(25) | 121.8(5) |
| N(4)-C(26)-C(25)  | 132.5(5) |
| C(28)-C(27)-C(32) | 119.6(5) |
| C(28)-C(27)-N(4)  | 120.0(5) |
| C(32)-C(27)-N(4)  | 120.4(5) |
| C(27)-C(28)-C(29) | 120.5(6) |
| C(30)-C(29)-C(28) | 119.8(6) |
| O(2)-C(30)-C(31)  | 115.1(6) |
| O(2)-C(30)-C(29)  | 125.3(6) |
| C(31)-C(30)-C(29) | 119.6(5) |
| C(32)-C(31)-C(30) | 120.4(6) |
| C(31)-C(32)-C(27) | 120.1(6) |
| C(40)-C(35)-C(36) | 120.3(5) |
| C(40)-C(35)-O(3)  | 124.8(5) |
| C(36)-C(35)-O(3)  | 114.9(5) |
| C(35)-C(36)-C(37) | 119.7(5) |
| C(38)-C(37)-C(36) | 120.3(5) |
| C(37)-C(38)-C(39) | 119.2(5) |
| C(37)-C(38)-N(5)  | 119.4(5) |
| C(39)-C(38)-N(5)  | 121.4(5) |
| C(38)-C(39)-C(40) | 121.2(5) |
| C(35)-C(40)-C(39) | 119.1(5) |
| N(6)-C(41)-N(5)   | 105.8(4) |
| N(6)-C(41)-Ag(1)  | 127.9(4) |
| N(5)-C(41)-Ag(1)  | 126.2(4) |
| C(43)-C(42)-C(47) | 121.9(5) |
| C(43)-C(42)-N(5)  | 132.3(5) |
| C(47)-C(42)-N(5)  | 105.9(4) |
| C(42)-C(43)-C(44) | 116.4(5) |
| C(43)-C(44)-C(45) | 121.5(5) |
| C(46)-C(45)-C(44) | 122.2(5) |
| C(47)-C(46)-C(45) | 116.0(5) |
| C(46)-C(47)-C(42) | 122.1(5) |

|                     |           |
|---------------------|-----------|
| C(46)-C(47)-N(6)    | 131.6(5)  |
| C(42)-C(47)-N(6)    | 106.3(4)  |
| N(6)-C(48)-C(49)    | 112.8(5)  |
| C(48)-C(49)-C(50)   | 115.3(5)  |
| C(51)-C(50)-C(49)   | 111.1(5)  |
| C(52)-C(51)-C(50)   | 116.4(5)  |
| C(51)-C(52)-N(7)    | 115.0(5)  |
| N(7)-C(53)-N(8)     | 106.8(5)  |
| N(7)-C(53)-Ag(2)    | 126.9(4)  |
| N(8)-C(53)-Ag(2)    | 126.4(4)  |
| C(59)-C(54)-N(7)    | 106.0(5)  |
| C(59)-C(54)-C(55)   | 122.1(5)  |
| N(7)-C(54)-C(55)    | 131.9(6)  |
| C(56)-C(55)-C(54)   | 116.8(6)  |
| C(55)-C(56)-C(57)   | 121.3(6)  |
| C(58)-C(57)-C(56)   | 121.8(6)  |
| C(57)-C(58)-C(59)   | 116.6(6)  |
| C(54)-C(59)-N(8)    | 106.3(5)  |
| C(54)-C(59)-C(58)   | 121.4(6)  |
| N(8)-C(59)-C(58)    | 132.3(6)  |
| C(65')-C(60)-N(8)   | 139.5(18) |
| C(61)-C(60)-N(8)    | 123.4(8)  |
| C(61)-C(60)-C(65)   | 119.1(9)  |
| N(8)-C(60)-C(65)    | 117.5(7)  |
| C(65')-C(60)-C(61') | 111(2)    |
| N(8)-C(60)-C(61')   | 106.4(14) |
| C(63)-O(4)-C(66)    | 120.6(9)  |
| C(60)-C(61)-C(62)   | 122.0(12) |
| C(63)-C(62)-C(61)   | 120.7(13) |
| C(64)-C(63)-C(62)   | 120.2(11) |
| C(64)-C(63)-O(4)    | 122.9(10) |
| C(62)-C(63)-O(4)    | 116.8(11) |
| C(63)-C(64)-C(65)   | 119.4(10) |
| C(64)-C(65)-C(60)   | 118.4(8)  |
| C(63')-O(4')-C(66') | 119(3)    |
| C(62')-C(61')-C(60) | 118(3)    |

|                      |          |
|----------------------|----------|
| C(63')-C(62')-C(61') | 120(3)   |
| O(4')-C(63')-C(62')  | 126(3)   |
| O(4')-C(63')-C(64')  | 115(4)   |
| C(62')-C(63')-C(64') | 118(3)   |
| C(65')-C(64')-C(63') | 120(3)   |
| C(60)-C(65')-C(64')  | 131(3)   |
| F(3)-P-F(2)          | 91.1(4)  |
| F(3)-P-F(5)          | 85.4(5)  |
| F(2)-P-F(5)          | 90.1(4)  |
| F(3)-P-F(4)          | 92.8(4)  |
| F(2)-P-F(4)          | 174.8(5) |
| F(5)-P-F(4)          | 86.8(5)  |
| F(3)-P-F(6)          | 98.1(5)  |
| F(2)-P-F(6)          | 90.1(4)  |
| F(5)-P-F(6)          | 176.4(5) |
| F(4)-P-F(6)          | 92.6(4)  |
| F(3)-P-F(1)          | 172.4(6) |
| F(2)-P-F(1)          | 90.0(4)  |
| F(5)-P-F(1)          | 87.1(5)  |
| F(4)-P-F(1)          | 85.6(4)  |
| F(6)-P-F(1)          | 89.4(4)  |
| F(8)-P(2)-F(12)      | 84.6(7)  |
| F(8)-P(2)-F(9)       | 98.2(7)  |
| F(12)-P(2)-F(9)      | 92.4(5)  |
| F(8)-P(2)-F(10)      | 174.7(7) |
| F(12)-P(2)-F(10)     | 99.7(8)  |
| F(9)-P(2)-F(10)      | 84.8(6)  |
| F(8)-P(2)-F(11)      | 87.0(6)  |
| F(12)-P(2)-F(11)     | 171.5(7) |
| F(9)-P(2)-F(11)      | 89.8(5)  |
| F(10)-P(2)-F(11)     | 88.7(5)  |
| F(8)-P(2)-F(7)       | 88.4(4)  |
| F(12)-P(2)-F(7)      | 88.5(5)  |
| F(9)-P(2)-F(7)       | 173.4(7) |
| F(10)-P(2)-F(7)      | 88.6(5)  |
| F(11)-P(2)-F(7)      | 90.3(5)  |

---

Symmetry transformations used to generate equivalent atoms:

Table 4. Anisotropic displacement parameters ( $\text{\AA}^2 \times 10^3$ ) for l1ag\_sq. The anisotropic displacement factor exponent takes the form:  $-2\pi^2 [h^2 a^{*2} U^{11} + \dots + 2 h k a^* b^* U^{12}]$

|       | $U^{11}$ | $U^{22}$ | $U^{33}$ | $U^{23}$ | $U^{13}$ | $U^{12}$ |
|-------|----------|----------|----------|----------|----------|----------|
| Ag(1) | 26(1)    | 45(1)    | 25(1)    | -3(1)    | 0(1)     | 0(1)     |
| Ag(2) | 39(1)    | 35(1)    | 36(1)    | -1(1)    | 13(1)    | -5(1)    |
| O(1)  | 112(5)   | 51(3)    | 42(3)    | -9(2)    | -20(3)   | 5(3)     |
| O(2)  | 113(4)   | 56(3)    | 27(2)    | 2(2)     | 11(2)    | 6(3)     |
| O(3)  | 90(4)    | 52(3)    | 23(2)    | 3(2)     | 9(2)     | 0(3)     |
| N(1)  | 37(2)    | 23(2)    | 33(2)    | -2(2)    | 6(2)     | 2(2)     |
| N(2)  | 36(2)    | 22(2)    | 29(2)    | -3(2)    | 5(2)     | 2(2)     |
| N(3)  | 27(2)    | 34(2)    | 23(2)    | 2(2)     | 3(2)     | 0(2)     |
| N(4)  | 31(2)    | 34(2)    | 25(2)    | -1(2)    | 6(2)     | 0(2)     |
| N(5)  | 33(2)    | 26(2)    | 26(2)    | -3(2)    | 6(2)     | -4(2)    |
| N(6)  | 28(2)    | 34(2)    | 26(2)    | -3(2)    | 2(2)     | -4(2)    |
| N(7)  | 30(2)    | 28(2)    | 39(3)    | 5(2)     | 11(2)    | -1(2)    |
| N(8)  | 37(3)    | 31(3)    | 44(3)    | 4(2)     | 6(2)     | -12(2)   |
| C(1)  | 111(7)   | 54(4)    | 35(4)    | 2(3)     | -10(4)   | 25(4)    |
| C(2)  | 63(4)    | 36(3)    | 34(3)    | -4(3)    | -6(3)    | 12(3)    |
| C(3)  | 74(5)    | 27(3)    | 48(4)    | -6(3)    | -14(3)   | -3(3)    |
| C(4)  | 57(4)    | 21(3)    | 47(4)    | 2(3)     | -8(3)    | 1(3)     |
| C(5)  | 33(3)    | 21(2)    | 34(3)    | -2(2)    | 2(2)     | 8(2)     |
| C(6)  | 34(3)    | 27(3)    | 36(3)    | -5(2)    | 7(2)     | 5(2)     |
| C(7)  | 45(3)    | 28(3)    | 37(3)    | 0(2)     | 5(2)     | 12(2)    |
| C(8)  | 32(3)    | 22(2)    | 31(3)    | 1(2)     | 3(2)     | 5(2)     |
| C(9)  | 40(3)    | 22(3)    | 35(3)    | -2(2)    | 12(2)    | 0(2)     |
| C(10) | 38(3)    | 26(3)    | 53(4)    | -3(3)    | 9(3)     | 2(2)     |
| C(11) | 45(4)    | 32(3)    | 72(5)    | -8(3)    | 27(3)    | -2(3)    |
| C(12) | 63(4)    | 30(3)    | 52(4)    | -6(3)    | 33(3)    | -4(3)    |
| C(13) | 53(4)    | 23(3)    | 41(3)    | -7(2)    | 15(3)    | 1(2)     |
| C(14) | 39(3)    | 19(2)    | 39(3)    | -3(2)    | 14(2)    | 4(2)     |
| C(15) | 37(3)    | 33(3)    | 28(3)    | -5(2)    | -1(2)    | -1(2)    |
| C(16) | 54(4)    | 37(3)    | 27(3)    | -6(2)    | 3(2)     | 7(3)     |
| C(17) | 41(3)    | 38(3)    | 26(3)    | -1(2)    | 3(2)     | 6(2)     |
| C(18) | 39(3)    | 41(3)    | 25(3)    | 2(2)     | 0(2)     | 5(2)     |

|       |        |       |       |        |        |        |
|-------|--------|-------|-------|--------|--------|--------|
| C(19) | 25(2)  | 39(3) | 25(2) | 7(2)   | 6(2)   | 2(2)   |
| C(20) | 29(3)  | 33(3) | 27(3) | -2(2)  | 5(2)   | 4(2)   |
| C(21) | 30(3)  | 29(3) | 33(3) | 9(2)   | 0(2)   | -2(2)  |
| C(22) | 34(3)  | 47(4) | 35(3) | 9(3)   | 0(2)   | -3(3)  |
| C(23) | 36(3)  | 53(4) | 48(4) | 15(3)  | -10(3) | -5(3)  |
| C(24) | 23(3)  | 56(4) | 56(4) | 13(3)  | 0(2)   | -7(3)  |
| C(25) | 30(3)  | 42(3) | 45(3) | 10(3)  | 7(2)   | 0(2)   |
| C(26) | 30(3)  | 31(3) | 29(3) | 7(2)   | -1(2)  | 1(2)   |
| C(27) | 36(3)  | 34(3) | 24(2) | -2(2)  | 0(2)   | 11(2)  |
| C(28) | 35(3)  | 40(3) | 32(3) | 1(2)   | 8(2)   | 7(2)   |
| C(29) | 47(3)  | 46(4) | 33(3) | -8(3)  | 2(2)   | 6(3)   |
| C(30) | 70(4)  | 38(3) | 26(3) | 5(3)   | 7(3)   | 16(3)  |
| C(31) | 77(5)  | 36(3) | 38(3) | 9(3)   | 16(3)  | 0(3)   |
| C(32) | 60(4)  | 32(3) | 35(3) | -2(3)  | 10(3)  | -2(3)  |
| C(33) | 111(7) | 80(6) | 25(3) | -11(4) | 1(4)   | 13(5)  |
| C(34) | 115(7) | 54(4) | 29(3) | -6(3)  | 17(4)  | 6(4)   |
| C(35) | 54(4)  | 40(3) | 23(3) | 1(2)   | 5(2)   | -13(3) |
| C(36) | 41(3)  | 36(3) | 33(3) | 7(2)   | 7(2)   | -3(3)  |
| C(37) | 38(3)  | 31(3) | 31(3) | 4(2)   | 7(2)   | 1(2)   |
| C(38) | 31(3)  | 28(3) | 27(3) | -2(2)  | -2(2)  | -7(2)  |
| C(39) | 41(3)  | 32(3) | 31(3) | 1(2)   | 6(2)   | 0(2)   |
| C(40) | 52(4)  | 29(3) | 32(3) | -8(2)  | 8(2)   | -3(3)  |
| C(41) | 25(2)  | 33(3) | 26(2) | 1(2)   | 3(2)   | -5(2)  |
| C(42) | 27(2)  | 16(2) | 31(3) | -1(2)  | -1(2)  | -4(2)  |
| C(43) | 31(3)  | 23(3) | 39(3) | 2(2)   | 10(2)  | -3(2)  |
| C(44) | 25(3)  | 29(3) | 58(4) | 4(3)   | -1(2)  | -5(2)  |
| C(45) | 36(3)  | 28(3) | 44(3) | 0(2)   | -11(2) | -1(2)  |
| C(46) | 39(3)  | 25(3) | 31(3) | -1(2)  | -2(2)  | -3(2)  |
| C(47) | 30(3)  | 21(2) | 32(3) | -2(2)  | 1(2)   | 0(2)   |
| C(48) | 35(3)  | 44(3) | 28(3) | -7(2)  | 7(2)   | -4(2)  |
| C(49) | 42(3)  | 66(4) | 32(3) | 4(3)   | 10(2)  | -9(3)  |
| C(50) | 40(3)  | 48(4) | 32(3) | 5(3)   | 7(2)   | 1(3)   |
| C(51) | 42(3)  | 62(4) | 38(3) | 12(3)  | 10(3)  | -4(3)  |
| C(52) | 34(3)  | 52(4) | 45(3) | 9(3)   | 9(2)   | 4(3)   |
| C(53) | 42(3)  | 26(3) | 39(3) | 1(2)   | 9(2)   | -7(2)  |
| C(54) | 32(3)  | 27(3) | 48(3) | 4(2)   | 15(2)  | 0(2)   |

|        |         |         |         |         |         |          |
|--------|---------|---------|---------|---------|---------|----------|
| C(55)  | 44(3)   | 35(3)   | 50(4)   | 9(3)    | 18(3)   | -2(3)    |
| C(56)  | 52(4)   | 36(3)   | 70(5)   | 10(3)   | 33(3)   | 1(3)     |
| C(57)  | 34(3)   | 40(4)   | 87(5)   | 10(3)   | 18(3)   | -2(3)    |
| C(58)  | 32(3)   | 35(3)   | 71(5)   | 14(3)   | 3(3)    | -7(3)    |
| C(59)  | 35(3)   | 27(3)   | 50(4)   | 4(2)    | 7(2)    | -5(2)    |
| C(60)  | 70(5)   | 45(4)   | 40(4)   | -1(3)   | 10(3)   | -35(4)   |
| O(4)   | 90(6)   | 57(5)   | 44(4)   | -6(3)   | -3(4)   | -13(4)   |
| C(61)  | 33(6)   | 33(6)   | 69(7)   | -3(5)   | 11(6)   | -11(4)   |
| C(62)  | 56(8)   | 53(8)   | 46(8)   | -25(8)  | 9(7)    | -18(6)   |
| C(63)  | 53(6)   | 46(5)   | 43(5)   | -9(4)   | 5(4)    | -18(5)   |
| C(64)  | 57(6)   | 41(5)   | 45(5)   | -2(4)   | -3(4)   | -6(4)    |
| C(66)  | 300(20) | 50(7)   | 106(10) | -37(7)  | 135(14) | -65(11)  |
| C(65)  | 55(6)   | 29(4)   | 45(5)   | -6(4)   | 5(4)    | -9(4)    |
| O(4')  | 78(17)  | 78(17)  | 57(14)  | -6(12)  | -20(12) | -18(14)  |
| C(61') | 16(15)  | 50(20)  | 47(17)  | -6(16)  | 15(12)  | -3(12)   |
| C(62') | 34(14)  | 37(15)  | 52(17)  | 3(13)   | 13(12)  | -4(11)   |
| C(63') | 16(13)  | 60(20)  | 34(18)  | -20(20) | 5(13)   | -5(13)   |
| C(64') | 57(6)   | 41(5)   | 45(5)   | -2(4)   | -3(4)   | -6(4)    |
| C(65') | 55(6)   | 29(4)   | 45(5)   | -6(4)   | 5(4)    | -9(4)    |
| C(66') | 300(20) | 50(7)   | 106(10) | -37(7)  | 135(14) | -65(11)  |
| P      | 41(1)   | 114(2)  | 155(3)  | 70(2)   | 0(1)    | -11(1)   |
| F(1)   | 78(4)   | 122(5)  | 187(7)  | 45(5)   | -46(4)  | -25(4)   |
| F(2)   | 77(4)   | 115(5)  | 135(5)  | 58(4)   | -12(3)  | -21(3)   |
| F(3)   | 120(6)  | 88(4)   | 260(10) | 45(6)   | -50(6)  | -46(4)   |
| F(4)   | 124(6)  | 131(6)  | 165(7)  | 61(5)   | -10(5)  | -5(5)    |
| F(5)   | 67(4)   | 236(10) | 161(7)  | -11(6)  | -4(4)   | 27(5)    |
| F(6)   | 66(4)   | 137(6)  | 221(8)  | 29(6)   | -6(4)   | 17(4)    |
| P(2)   | 96(2)   | 100(2)  | 36(1)   | -14(1)  | 10(1)   | -53(1)   |
| F(7)   | 170(7)  | 118(5)  | 137(6)  | 37(4)   | -43(5)  | -76(5)   |
| F(8)   | 446(18) | 103(6)  | 90(5)   | 17(4)   | -50(8)  | 11(8)    |
| F(9)   | 321(13) | 202(9)  | 179(9)  | -116(8) | 81(9)   | -180(10) |
| F(10)  | 155(7)  | 216(9)  | 150(7)  | -31(7)  | -83(6)  | 26(7)    |
| F(11)  | 82(4)   | 338(13) | 96(5)   | 2(6)    | 18(4)   | -14(6)   |
| F(12)  | 322(14) | 289(13) | 176(8)  | -142(9) | 190(10) | -153(11) |

---

Table 5. Hydrogen coordinates ( $\times 10^4$ ) and isotropic displacement parameters ( $\text{\AA}^2 \times 10^{-3}$ ) for 1lag\_sq.

|        | x     | y     | z    | U(eq) |
|--------|-------|-------|------|-------|
| H(1A)  | 4950  | 964   | -79  | 102   |
| H(1B)  | 4995  | 1687  | 352  | 102   |
| H(1C)  | 5701  | 1067  | 304  | 102   |
| H(3A)  | 4456  | -422  | 1306 | 61    |
| H(4A)  | 4781  | -366  | 2184 | 51    |
| H(6A)  | 6038  | 1747  | 1996 | 39    |
| H(7A)  | 5715  | 1697  | 1114 | 44    |
| H(10A) | 4156  | 530   | 2820 | 46    |
| H(11A) | 3701  | 426   | 3627 | 58    |
| H(12A) | 4526  | 498   | 4367 | 56    |
| H(13A) | 5843  | 650   | 4341 | 46    |
| H(15A) | 7076  | 1278  | 4015 | 39    |
| H(15B) | 7580  | 1104  | 3555 | 39    |
| H(16A) | 7925  | 213   | 4261 | 47    |
| H(16B) | 7095  | -192  | 4209 | 47    |
| H(17A) | 8098  | -384  | 3429 | 42    |
| H(17B) | 7313  | -882  | 3455 | 42    |
| H(18A) | 7867  | -1518 | 4255 | 42    |
| H(18B) | 8660  | -1119 | 4138 | 42    |
| H(19A) | 8551  | -2587 | 3921 | 35    |
| H(19B) | 7859  | -2366 | 3509 | 35    |
| H(22A) | 9935  | -2017 | 4162 | 46    |
| H(23A) | 11251 | -1954 | 4097 | 56    |
| H(24A) | 11731 | -1825 | 3314 | 54    |
| H(25A) | 10920 | -1822 | 2551 | 46    |
| H(28A) | 8681  | -3026 | 1891 | 42    |
| H(29A) | 8611  | -2990 | 996  | 50    |
| H(31A) | 9979  | -917  | 1076 | 59    |
| H(32A) | 10010 | -927  | 1962 | 50    |
| H(33A) | 8900  | -2354 | -234 | 109   |



|        |       |       |      |     |
|--------|-------|-------|------|-----|
| H(33B) | 9086  | -3044 | 208  | 109 |
| H(33C) | 8332  | -2479 | 196  | 109 |
| H(34A) | 5972  | -1689 | 5129 | 98  |
| H(34B) | 6039  | -1036 | 4668 | 98  |
| H(34C) | 5282  | -1582 | 4695 | 98  |
| H(36A) | 6654  | -3268 | 3862 | 44  |
| H(37A) | 6507  | -3267 | 2971 | 40  |
| H(39A) | 5152  | -1188 | 2983 | 42  |
| H(40A) | 5281  | -1187 | 3875 | 45  |
| H(43A) | 4219  | -2136 | 2401 | 37  |
| H(44A) | 3359  | -2145 | 1658 | 45  |
| H(45A) | 3786  | -2231 | 854  | 44  |
| H(46A) | 5085  | -2259 | 747  | 38  |
| H(48A) | 6522  | -2730 | 947  | 42  |
| H(48B) | 7222  | -2461 | 1344 | 42  |
| H(49A) | 6282  | -1268 | 750  | 56  |
| H(49B) | 7104  | -1552 | 615  | 56  |
| H(50A) | 6787  | -500  | 1460 | 48  |
| H(50B) | 7612  | -896  | 1423 | 48  |
| H(51A) | 7763  | -138  | 687  | 57  |
| H(51B) | 6896  | 151   | 631  | 57  |
| H(52A) | 7136  | 1041  | 1344 | 52  |
| H(52B) | 7610  | 1306  | 883  | 52  |
| H(55A) | 8880  | 840   | 539  | 50  |
| H(56A) | 10198 | 847   | 483  | 61  |
| H(57A) | 11043 | 870   | 1214 | 64  |
| H(58A) | 10613 | 913   | 2033 | 55  |
| H(61A) | 8674  | 1789  | 2919 | 53  |
| H(62A) | 9070  | 1715  | 3783 | 62  |
| H(64A) | 10558 | -143  | 3533 | 58  |
| H(66A) | 10767 | 253   | 4875 | 218 |
| H(66B) | 10585 | -429  | 4428 | 218 |
| H(66C) | 11175 | 325   | 4361 | 218 |
| H(65A) | 10154 | -81   | 2647 | 52  |
| H(61B) | 8469  | 2031  | 2781 | 45  |
| H(62B) | 8689  | 2232  | 3667 | 49  |

|        |       |      |      |     |
|--------|-------|------|------|-----|
| H(64B) | 10134 | 195  | 3684 | 58  |
| H(65B) | 9789  | -70  | 2873 | 52  |
| H(66D) | 9318  | 1760 | 4953 | 218 |
| H(66E) | 9296  | 2431 | 4494 | 218 |
| H(66F) | 8612  | 1774 | 4527 | 218 |

---

## 4.2 X ray crystal structure of 1c–Pd complex:

Table 1. Crystal data and structure refinement for 1lpd.

|                                   |                                                                                                                |                        |
|-----------------------------------|----------------------------------------------------------------------------------------------------------------|------------------------|
| Identification code               | 1lpd                                                                                                           |                        |
| Empirical formula                 | C <sub>68</sub> H <sub>68</sub> Cl <sub>7</sub> F <sub>6</sub> N <sub>8</sub> O <sub>4</sub> P Pd <sub>2</sub> |                        |
| Formula weight                    | 1667.22                                                                                                        |                        |
| Temperature                       | 150(2) K                                                                                                       |                        |
| Wavelength                        | 0.71073 Å                                                                                                      |                        |
| Crystal system                    | triclinic                                                                                                      |                        |
| Space group                       | P -1                                                                                                           |                        |
| Unit cell dimensions              | a = 12.6608(10) Å                                                                                              | $\alpha$ = 87.943(3)°. |
|                                   | b = 17.1920(14) Å                                                                                              | $\beta$ = 84.738(3)°.  |
|                                   | c = 18.8963(15) Å                                                                                              | $\gamma$ = 76.841(3)°. |
| Volume                            | 3987.7(6) Å <sup>3</sup>                                                                                       |                        |
| Z                                 | 2                                                                                                              |                        |
| Density (calculated)              | 1.389 Mg/m <sup>3</sup>                                                                                        |                        |
| Absorption coefficient            | 0.767 mm <sup>-1</sup>                                                                                         |                        |
| F(000)                            | 1688                                                                                                           |                        |
| Crystal size                      | 0.250 x 0.240 x 0.030 mm <sup>3</sup>                                                                          |                        |
| Theta range for data collection   | 2.838 to 26.500°.                                                                                              |                        |
| Index ranges                      | -15 ≤ h ≤ 15, -21 ≤ k ≤ 21, -23 ≤ l ≤ 23                                                                       |                        |
| Reflections collected             | 84054                                                                                                          |                        |
| Independent reflections           | 16416 [R(int) = 0.0687]                                                                                        |                        |
| Completeness to theta = 25.242°   | 99.7 %                                                                                                         |                        |
| Absorption correction             | Semi-empirical from equivalents                                                                                |                        |
| Max. and min. transmission        | 0.9281 and 0.7631                                                                                              |                        |
| Refinement method                 | Full-matrix least-squares on F <sup>2</sup>                                                                    |                        |
| Data / restraints / parameters    | 16416 / 2 / 870                                                                                                |                        |
| Goodness-of-fit on F <sup>2</sup> | 1.067                                                                                                          |                        |
| Final R indices [I > 2sigma(I)]   | R1 = 0.1096, wR2 = 0.2830                                                                                      |                        |
| R indices (all data)              | R1 = 0.1375, wR2 = 0.3036                                                                                      |                        |
| Extinction coefficient            | 0.0066(6)                                                                                                      |                        |
| Largest diff. peak and hole       | 2.413 and -2.193 e.Å <sup>-3</sup>                                                                             |                        |

Table 2. Atomic coordinates ( $\times 10^4$ ) and equivalent isotropic displacement parameters ( $\text{\AA}^2 \times 10^3$ ) for 11pd.  $U(\text{eq})$  is defined as one third of the trace of the orthogonalized  $U^{ij}$  tensor.

|       | x         | y        | z       | $U(\text{eq})$ |
|-------|-----------|----------|---------|----------------|
| Pd(1) | 7912(1)   | 8298(1)  | 8636(1) | 30(1)          |
| Pd(2) | 8274(1)   | 8328(1)  | 6277(1) | 46(1)          |
| Cl(1) | 7887(2)   | 8704(2)  | 7455(1) | 45(1)          |
| Cl(2) | 7767(3)   | 8072(2)  | 9837(1) | 60(1)          |
| Cl(3) | 8639(3)   | 8115(2)  | 5088(1) | 74(1)          |
| O(1)  | 12143(6)  | 5570(4)  | 9069(4) | 43(2)          |
| O(2)  | 6156(9)   | 5270(6)  | 5864(6) | 76(3)          |
| O(3)  | 3462(8)   | 10846(5) | 7925(5) | 62(3)          |
| O(4)  | 10491(9)  | 11386(6) | 6637(5) | 84(4)          |
| N(1)  | 9987(7)   | 8757(4)  | 8968(4) | 31(2)          |
| N(2)  | 8761(7)   | 9830(4)  | 8733(4) | 34(2)          |
| N(3)  | 6292(7)   | 9702(6)  | 6156(4) | 43(2)          |
| N(4)  | 5948(7)   | 8540(6)  | 5930(4) | 45(2)          |
| N(5)  | 5822(7)   | 7763(5)  | 8419(4) | 40(2)          |
| N(6)  | 7161(7)   | 6753(4)  | 8643(4) | 31(2)          |
| N(7)  | 10264(8)  | 6974(8)  | 6338(5) | 63(4)          |
| N(8)  | 10665(7)  | 8115(8)  | 6547(5) | 57(3)          |
| C(1)  | 8943(8)   | 8999(6)  | 8762(5) | 35(2)          |
| C(2)  | 10420(8)  | 9413(6)  | 9051(5) | 34(2)          |
| C(3)  | 11454(9)  | 9469(7)  | 9236(5) | 42(2)          |
| C(4)  | 11608(10) | 10230(7) | 9282(5) | 43(2)          |
| C(5)  | 10818(10) | 10905(6) | 9143(5) | 41(2)          |
| C(6)  | 9830(9)   | 10850(6) | 8926(5) | 41(2)          |
| C(7)  | 9655(9)   | 10105(6) | 8910(5) | 36(2)          |
| C(8)  | 7791(9)   | 10342(6) | 8480(5) | 41(2)          |
| C(9)  | 8017(9)   | 10696(6) | 7732(6) | 44(3)          |
| C(10) | 6962(10)  | 11146(7) | 7432(6) | 52(3)          |
| C(11) | 6317(9)   | 10611(8) | 7118(6) | 53(3)          |
| C(12) | 6815(9)   | 10295(7) | 6391(5) | 47(3)          |
| C(13) | 5196(8)   | 9851(8)  | 5990(5) | 47(3)          |
| C(14) | 4402(9)   | 10556(8) | 5950(5) | 53(3)          |

|        |           |          |          |       |
|--------|-----------|----------|----------|-------|
| C(15)  | 3371(8)   | 10466(9) | 5764(6)  | 54(4) |
| C(16)  | 3173(9)   | 9742(9)  | 5623(6)  | 57(4) |
| C(17)  | 3966(9)   | 9035(8)  | 5657(5)  | 52(3) |
| C(18)  | 4984(9)   | 9126(8)  | 5834(5)  | 50(3) |
| C(19)  | 6717(8)   | 8907(7)  | 6119(5)  | 46(3) |
| C(20)  | 10520(8)  | 7927(5)  | 9000(5)  | 31(2) |
| C(21)  | 10629(9)  | 7458(6)  | 8418(5)  | 38(2) |
| C(22)  | 11168(8)  | 6662(6)  | 8454(5)  | 34(2) |
| C(23)  | 11612(8)  | 6352(5)  | 9073(5)  | 35(2) |
| C(24)  | 11533(9)  | 6842(6)  | 9664(5)  | 40(2) |
| C(25)  | 11001(8)  | 7625(6)  | 9615(5)  | 34(2) |
| C(26)  | 12649(9)  | 5246(6)  | 9684(7)  | 49(3) |
| C(27)  | 6048(8)   | 7715(8)  | 5901(6)  | 50(3) |
| C(28)  | 5776(11)  | 7374(8)  | 5299(6)  | 58(4) |
| C(29)  | 5845(14)  | 6557(9)  | 5286(9)  | 79(5) |
| C(30)  | 6128(12)  | 6070(9)  | 5862(8)  | 73(5) |
| C(31)  | 6426(10)  | 6394(10) | 6448(9)  | 79(6) |
| C(32)  | 6370(9)   | 7220(9)  | 6482(6)  | 60(4) |
| C(33)  | 6592(17)  | 4872(13) | 6465(16) | 77(7) |
| C(33') | 5757(18)  | 4929(16) | 5346(11) | 77(7) |
| C(34)  | 6886(9)   | 7560(5)  | 8556(5)  | 35(2) |
| C(35)  | 5415(9)   | 7053(6)  | 8420(5)  | 37(2) |
| C(36)  | 4388(9)   | 6943(7)  | 8309(6)  | 45(3) |
| C(37)  | 4288(10)  | 6145(7)  | 8329(6)  | 51(3) |
| C(38)  | 5154(11)  | 5516(7)  | 8468(5)  | 47(3) |
| C(39)  | 6153(10)  | 5636(6)  | 8606(6)  | 49(3) |
| C(40)  | 6274(9)   | 6431(6)  | 8548(5)  | 36(2) |
| C(41)  | 8253(9)   | 6282(6)  | 8771(5)  | 40(2) |
| C(42)  | 8803(10)  | 5802(6)  | 8140(6)  | 47(3) |
| C(43)  | 8920(9)   | 6315(6)  | 7477(5)  | 45(3) |
| C(44)  | 9537(11)  | 5834(9)  | 6839(6)  | 67(4) |
| C(45)  | 9677(11)  | 6383(10) | 6202(6)  | 67(4) |
| C(46)  | 11394(9)  | 6837(11) | 6449(6)  | 67(5) |
| C(47)  | 12190(11) | 6107(10) | 6408(6)  | 76(5) |
| C(48)  | 13241(12) | 6196(13) | 6512(7)  | 88(7) |
| C(49)  | 13484(10) | 6917(12) | 6626(7)  | 74(5) |

|       |           |           |          |         |
|-------|-----------|-----------|----------|---------|
| C(50) | 12686(9)  | 7617(10)  | 6667(6)  | 67(4)   |
| C(51) | 11635(9)  | 7569(9)   | 6582(6)  | 57(4)   |
| C(52) | 9841(10)  | 7752(8)   | 6400(5)  | 57(4)   |
| C(53) | 5229(8)   | 8554(6)   | 8315(5)  | 42(3)   |
| C(54) | 5253(9)   | 9144(6)   | 8787(5)  | 44(3)   |
| C(55) | 4676(10)  | 9927(7)   | 8673(6)  | 53(3)   |
| C(56) | 4050(10)  | 10092(6)  | 8087(6)  | 47(3)   |
| C(57) | 4002(9)   | 9513(7)   | 7639(6)  | 45(3)   |
| C(58) | 4590(9)   | 8716(6)   | 7739(5)  | 37(2)   |
| C(59) | 3533(12)  | 11476(7)  | 8334(7)  | 61(4)   |
| C(60) | 10565(9)  | 8958(8)   | 6598(6)  | 56(4)   |
| C(61) | 11006(9)  | 9265(9)   | 7168(6)  | 61(4)   |
| C(62) | 10993(9)  | 10063(8)  | 7175(6)  | 59(4)   |
| C(63) | 10532(10) | 10598(9)  | 6658(6)  | 66(4)   |
| C(64) | 10079(10) | 10273(9)  | 6095(6)  | 66(4)   |
| C(65) | 10138(9)  | 9495(10)  | 6069(6)  | 66(4)   |
| C(66) | 10981(13) | 11691(10) | 7175(8)  | 79(5)   |
| Cl(4) | 7985(4)   | 1954(3)   | 5236(3)  | 88(1)   |
| Cl(6) | 3955(5)   | 8111(3)   | 10105(3) | 106(2)  |
| Cl(5) | 8320(5)   | 3541(3)   | 5476(3)  | 104(2)  |
| Cl(7) | 5647(6)   | 6896(4)   | 10593(5) | 162(3)  |
| C(67) | 8608(11)  | 2557(9)   | 5739(7)  | 61(4)   |
| C(68) | 4409(15)  | 7067(12)  | 10295(9) | 94(6)   |
| P     | 8014(4)   | 3289(2)   | 8060(2)  | 69(1)   |
| F(1)  | 8275(13)  | 2723(6)   | 7416(5)  | 126(5)  |
| F(2)  | 8880(13)  | 2727(7)   | 8450(9)  | 162(7)  |
| F(3)  | 7869(17)  | 3864(7)   | 8701(6)  | 194(9)  |
| F(4)  | 7250(30)  | 3810(20)  | 7627(16) | 390(30) |
| F(5)  | 8680(30)  | 3812(12)  | 7719(9)  | 317(18) |
| F(6)  | 7244(18)  | 2820(20)  | 8394(10) | 293(16) |

---

Table 3. Bond lengths [Å] and angles [°] for 11pd.

|             |           |
|-------------|-----------|
| Pd(1)-C(1)  | 2.000(11) |
| Pd(1)-C(34) | 2.031(11) |
| Pd(1)-Cl(2) | 2.286(3)  |
| Pd(1)-Cl(1) | 2.315(2)  |
| Pd(2)-C(19) | 2.039(10) |
| Pd(2)-C(52) | 2.036(10) |
| Pd(2)-Cl(3) | 2.277(3)  |
| Pd(2)-Cl(1) | 2.318(3)  |
| O(1)-C(23)  | 1.359(11) |
| O(1)-C(26)  | 1.414(13) |
| O(2)-C(30)  | 1.368(19) |
| O(2)-C(33)  | 1.40(3)   |
| O(2)-C(33') | 1.351(2)  |
| O(3)-C(56)  | 1.379(12) |
| O(3)-C(59)  | 1.377(15) |
| O(4)-C(63)  | 1.344(19) |
| O(4)-C(66)  | 1.41(2)   |
| N(1)-C(2)   | 1.382(12) |
| N(1)-C(1)   | 1.380(13) |
| N(1)-C(20)  | 1.434(11) |
| N(2)-C(1)   | 1.395(12) |
| N(2)-C(7)   | 1.393(14) |
| N(2)-C(8)   | 1.448(13) |
| N(3)-C(13)  | 1.416(14) |
| N(3)-C(12)  | 1.438(16) |
| N(3)-C(19)  | 1.352(15) |
| N(4)-C(19)  | 1.354(16) |
| N(4)-C(27)  | 1.398(16) |
| N(4)-C(18)  | 1.415(12) |
| N(5)-C(34)  | 1.358(14) |
| N(5)-C(35)  | 1.429(14) |
| N(5)-C(53)  | 1.412(13) |
| N(6)-C(34)  | 1.359(12) |
| N(6)-C(40)  | 1.390(13) |

|                 |           |
|-----------------|-----------|
| N(6)-C(41)      | 1.470(13) |
| N(7)-C(52)      | 1.328(17) |
| N(7)-C(46)      | 1.429(16) |
| N(7)-C(45)      | 1.43(2)   |
| N(8)-C(52)      | 1.384(19) |
| N(8)-C(51)      | 1.371(13) |
| N(8)-C(60)      | 1.432(19) |
| C(2)-C(7)       | 1.386(14) |
| C(2)-C(3)       | 1.410(15) |
| C(3)-C(4)       | 1.373(15) |
| C(4)-C(5)       | 1.384(16) |
| C(5)-C(6)       | 1.375(16) |
| C(6)-C(7)       | 1.352(14) |
| C(8)-C(9)       | 1.547(13) |
| C(9)-C(10)      | 1.530(16) |
| C(10)-C(11)     | 1.529(19) |
| C(11)-C(12)     | 1.524(14) |
| C(13)-C(14)     | 1.392(14) |
| C(13)-C(18)     | 1.380(19) |
| C(14)-C(15)     | 1.425(18) |
| C(15)-C(16)     | 1.36(2)   |
| C(16)-C(17)     | 1.392(16) |
| C(17)-C(18)     | 1.405(18) |
| C(20)-C(21)     | 1.366(13) |
| C(20)-C(25)     | 1.390(13) |
| C(21)-C(22)     | 1.386(13) |
| C(22)-C(23)     | 1.380(14) |
| C(23)-C(24)     | 1.406(14) |
| C(24)-C(25)     | 1.365(14) |
| C(27)-C(32)     | 1.397(14) |
| C(27)-C(28)     | 1.402(19) |
| C(28)-C(29)     | 1.39(2)   |
| C(29)-C(30)     | 1.373(19) |
| C(30)-C(31)     | 1.38(2)   |
| C(31)-C(32)     | 1.41(2)   |
| C(33')-C(33')#1 | 2.38(4)   |



|             |           |
|-------------|-----------|
| C(35)-C(40) | 1.373(14) |
| C(35)-C(36) | 1.391(16) |
| C(36)-C(37) | 1.405(17) |
| C(37)-C(38) | 1.390(17) |
| C(38)-C(39) | 1.376(17) |
| C(39)-C(40) | 1.408(15) |
| C(41)-C(42) | 1.498(14) |
| C(42)-C(43) | 1.520(15) |
| C(43)-C(44) | 1.534(15) |
| C(44)-C(45) | 1.53(2)   |
| C(46)-C(47) | 1.419(18) |
| C(46)-C(51) | 1.40(2)   |
| C(47)-C(48) | 1.41(2)   |
| C(48)-C(49) | 1.37(3)   |
| C(49)-C(50) | 1.383(19) |
| C(50)-C(51) | 1.377(19) |
| C(53)-C(58) | 1.398(15) |
| C(53)-C(54) | 1.382(16) |
| C(54)-C(55) | 1.397(15) |
| C(55)-C(56) | 1.405(18) |
| C(56)-C(57) | 1.344(17) |
| C(57)-C(58) | 1.418(14) |
| C(60)-C(65) | 1.397(14) |
| C(60)-C(61) | 1.43(2)   |
| C(61)-C(62) | 1.37(2)   |
| C(62)-C(63) | 1.391(16) |
| C(63)-C(64) | 1.44(2)   |
| C(64)-C(65) | 1.33(2)   |
| Cl(4)-C(67) | 1.782(15) |
| Cl(6)-C(68) | 1.79(2)   |
| Cl(5)-C(67) | 1.713(15) |
| Cl(7)-C(68) | 1.67(2)   |
| P-F(6)      | 1.483(19) |
| P-F(4)      | 1.450(17) |
| P-F(2)      | 1.515(11) |
| P-F(3)      | 1.562(11) |

|                   |            |
|-------------------|------------|
| P-F(1)            | 1.550(9)   |
| P-F(5)            | 1.463(17)  |
| F(2)-F(5)         | 2.26(2)    |
| C(1)-Pd(1)-C(34)  | 177.1(4)   |
| C(1)-Pd(1)-Cl(2)  | 89.7(3)    |
| C(34)-Pd(1)-Cl(2) | 87.7(3)    |
| C(1)-Pd(1)-Cl(1)  | 88.7(3)    |
| C(34)-Pd(1)-Cl(1) | 94.1(3)    |
| Cl(2)-Pd(1)-Cl(1) | 171.67(12) |
| C(19)-Pd(2)-C(52) | 178.2(4)   |
| C(19)-Pd(2)-Cl(3) | 90.3(3)    |
| C(52)-Pd(2)-Cl(3) | 88.0(3)    |
| C(19)-Pd(2)-Cl(1) | 87.2(3)    |
| C(52)-Pd(2)-Cl(1) | 94.5(3)    |
| Cl(3)-Pd(2)-Cl(1) | 173.16(13) |
| Pd(1)-Cl(1)-Pd(2) | 146.70(13) |
| C(23)-O(1)-C(26)  | 118.1(8)   |
| C(30)-O(2)-C(33)  | 112.6(16)  |
| C(30)-O(2)-C(33') | 122.1(16)  |
| C(56)-O(3)-C(59)  | 118.7(11)  |
| C(63)-O(4)-C(66)  | 117.2(11)  |
| C(2)-N(1)-C(1)    | 110.1(8)   |
| C(2)-N(1)-C(20)   | 128.3(8)   |
| C(1)-N(1)-C(20)   | 121.2(8)   |
| C(1)-N(2)-C(7)    | 112.5(8)   |
| C(1)-N(2)-C(8)    | 123.4(9)   |
| C(7)-N(2)-C(8)    | 123.9(8)   |
| C(13)-N(3)-C(12)  | 124.9(9)   |
| C(13)-N(3)-C(19)  | 108.4(11)  |
| C(12)-N(3)-C(19)  | 126.5(9)   |
| C(19)-N(4)-C(27)  | 125.8(9)   |
| C(19)-N(4)-C(18)  | 108.8(11)  |
| C(27)-N(4)-C(18)  | 125.1(11)  |
| C(34)-N(5)-C(35)  | 108.8(8)   |
| C(34)-N(5)-C(53)  | 124.5(9)   |

|                   |           |
|-------------------|-----------|
| C(35)-N(5)-C(53)  | 126.7(9)  |
| C(34)-N(6)-C(40)  | 109.9(9)  |
| C(34)-N(6)-C(41)  | 125.3(9)  |
| C(40)-N(6)-C(41)  | 124.7(8)  |
| C(52)-N(7)-C(46)  | 107.8(14) |
| C(52)-N(7)-C(45)  | 125.6(11) |
| C(46)-N(7)-C(45)  | 126.7(12) |
| C(52)-N(8)-C(51)  | 111.5(13) |
| C(52)-N(8)-C(60)  | 125.4(9)  |
| C(51)-N(8)-C(60)  | 123.0(12) |
| N(1)-C(1)-N(2)    | 103.9(9)  |
| N(1)-C(1)-Pd(1)   | 126.6(7)  |
| N(2)-C(1)-Pd(1)   | 129.3(7)  |
| N(1)-C(2)-C(7)    | 109.5(9)  |
| N(1)-C(2)-C(3)    | 131.0(9)  |
| C(7)-C(2)-C(3)    | 119.5(9)  |
| C(4)-C(3)-C(2)    | 115.6(10) |
| C(5)-C(4)-C(3)    | 122.9(11) |
| C(4)-C(5)-C(6)    | 121.5(10) |
| C(7)-C(6)-C(5)    | 115.8(10) |
| C(6)-C(7)-C(2)    | 124.4(11) |
| C(6)-C(7)-N(2)    | 131.5(10) |
| C(2)-C(7)-N(2)    | 104.0(8)  |
| N(2)-C(8)-C(9)    | 112.0(8)  |
| C(8)-C(9)-C(10)   | 111.3(9)  |
| C(9)-C(10)-C(11)  | 114.5(9)  |
| C(12)-C(11)-C(10) | 112.6(10) |
| N(3)-C(12)-C(11)  | 111.3(10) |
| N(3)-C(13)-C(14)  | 131.7(14) |
| N(3)-C(13)-C(18)  | 107.3(9)  |
| C(14)-C(13)-C(18) | 121.0(12) |
| C(13)-C(14)-C(15) | 115.4(13) |
| C(16)-C(15)-C(14) | 122.7(10) |
| C(15)-C(16)-C(17) | 122.2(13) |
| C(18)-C(17)-C(16) | 115.1(14) |
| C(17)-C(18)-N(4)  | 129.8(13) |

|                      |           |
|----------------------|-----------|
| C(17)-C(18)-C(13)    | 123.6(10) |
| N(4)-C(18)-C(13)     | 106.5(11) |
| N(4)-C(19)-N(3)      | 109.0(9)  |
| N(4)-C(19)-Pd(2)     | 124.0(8)  |
| N(3)-C(19)-Pd(2)     | 126.9(10) |
| C(21)-C(20)-N(1)     | 120.6(8)  |
| C(21)-C(20)-C(25)    | 120.6(8)  |
| N(1)-C(20)-C(25)     | 118.7(8)  |
| C(20)-C(21)-C(22)    | 119.7(9)  |
| C(23)-C(22)-C(21)    | 119.9(8)  |
| O(1)-C(23)-C(22)     | 116.8(9)  |
| O(1)-C(23)-C(24)     | 122.8(9)  |
| C(22)-C(23)-C(24)    | 120.4(8)  |
| C(25)-C(24)-C(23)    | 118.7(9)  |
| C(24)-C(25)-C(20)    | 120.7(9)  |
| C(32)-C(27)-N(4)     | 120.7(12) |
| C(32)-C(27)-C(28)    | 118.8(13) |
| N(4)-C(27)-C(28)     | 120.4(9)  |
| C(29)-C(28)-C(27)    | 119.9(12) |
| C(28)-C(29)-C(30)    | 121.7(17) |
| C(31)-C(30)-O(2)     | 119.0(12) |
| C(31)-C(30)-C(29)    | 118.8(16) |
| O(2)-C(30)-C(29)     | 122.2(17) |
| C(30)-C(31)-C(32)    | 121.1(12) |
| C(27)-C(32)-C(31)    | 119.6(14) |
| O(2)-C(33')-C(33')#1 | 143(2)    |
| N(6)-C(34)-N(5)      | 107.6(9)  |
| N(6)-C(34)-Pd(1)     | 124.6(8)  |
| N(5)-C(34)-Pd(1)     | 127.8(7)  |
| C(40)-C(35)-N(5)     | 106.2(9)  |
| C(40)-C(35)-C(36)    | 122.8(10) |
| N(5)-C(35)-C(36)     | 131.0(10) |
| C(35)-C(36)-C(37)    | 115.3(10) |
| C(36)-C(37)-C(38)    | 121.8(11) |
| C(39)-C(38)-C(37)    | 122.3(10) |
| C(38)-C(39)-C(40)    | 116.0(11) |

|                   |           |
|-------------------|-----------|
| C(35)-C(40)-N(6)  | 107.6(9)  |
| C(35)-C(40)-C(39) | 121.6(11) |
| N(6)-C(40)-C(39)  | 130.7(10) |
| N(6)-C(41)-C(42)  | 112.6(8)  |
| C(41)-C(42)-C(43) | 112.8(8)  |
| C(42)-C(43)-C(44) | 113.2(9)  |
| C(43)-C(44)-C(45) | 110.9(11) |
| N(7)-C(45)-C(44)  | 113.5(11) |
| N(7)-C(46)-C(47)  | 128.4(18) |
| N(7)-C(46)-C(51)  | 108.4(11) |
| C(47)-C(46)-C(51) | 123.1(14) |
| C(48)-C(47)-C(46) | 113.3(17) |
| C(47)-C(48)-C(49) | 123.7(13) |
| C(50)-C(49)-C(48) | 121.6(15) |
| C(49)-C(50)-C(51) | 117.7(17) |
| N(8)-C(51)-C(50)  | 134.6(16) |
| N(8)-C(51)-C(46)  | 104.5(12) |
| C(50)-C(51)-C(46) | 120.7(12) |
| N(8)-C(52)-N(7)   | 107.8(10) |
| N(8)-C(52)-Pd(2)  | 125.4(9)  |
| N(7)-C(52)-Pd(2)  | 126.7(12) |
| C(58)-C(53)-N(5)  | 118.3(10) |
| C(58)-C(53)-C(54) | 121.1(9)  |
| N(5)-C(53)-C(54)  | 120.5(10) |
| C(55)-C(54)-C(53) | 120.1(11) |
| C(54)-C(55)-C(56) | 118.7(12) |
| O(3)-C(56)-C(57)  | 115.7(11) |
| O(3)-C(56)-C(55)  | 123.1(11) |
| C(57)-C(56)-C(55) | 121.2(10) |
| C(56)-C(57)-C(58) | 121.1(11) |
| C(53)-C(58)-C(57) | 117.7(10) |
| C(65)-C(60)-N(8)  | 122.1(13) |
| C(65)-C(60)-C(61) | 117.8(14) |
| N(8)-C(60)-C(61)  | 119.9(9)  |
| C(62)-C(61)-C(60) | 119.2(11) |
| C(61)-C(62)-C(63) | 122.5(14) |

|                   |           |
|-------------------|-----------|
| O(4)-C(63)-C(62)  | 125.3(15) |
| O(4)-C(63)-C(64)  | 117.7(11) |
| C(62)-C(63)-C(64) | 117.0(14) |
| C(65)-C(64)-C(63) | 120.5(11) |
| C(64)-C(65)-C(60) | 122.8(15) |
| Cl(4)-C(67)-Cl(5) | 112.8(7)  |
| Cl(7)-C(68)-Cl(6) | 109.4(12) |
| F(6)-P-F(4)       | 97(2)     |
| F(6)-P-F(2)       | 86.4(14)  |
| F(4)-P-F(2)       | 174.7(18) |
| F(6)-P-F(3)       | 94.1(12)  |
| F(4)-P-F(3)       | 96.8(12)  |
| F(2)-P-F(3)       | 87.1(7)   |
| F(6)-P-F(1)       | 90.3(11)  |
| F(4)-P-F(1)       | 86.0(12)  |
| F(2)-P-F(1)       | 89.8(8)   |
| F(3)-P-F(1)       | 174.5(11) |
| F(6)-P-F(5)       | 174.4(19) |
| F(4)-P-F(5)       | 78(2)     |
| F(2)-P-F(5)       | 98.9(17)  |
| F(3)-P-F(5)       | 84.3(10)  |
| F(1)-P-F(5)       | 91.6(8)   |
| P-F(2)-F(5)       | 39.7(10)  |
| P-F(5)-F(2)       | 41.4(8)   |

---

Symmetry transformations used to generate equivalent atoms:

#1 -x+1,-y+1,-z+1

Table 4. Anisotropic displacement parameters ( $\text{\AA}^2 \times 10^3$ ) for 11pd. The anisotropic displacement factor exponent takes the form:  $-2\pi^2 [h^2 a^{*2} U^{11} + \dots + 2 h k a^* b^* U^{12}]$

|       | $U^{11}$ | $U^{22}$ | $U^{33}$ | $U^{23}$ | $U^{13}$ | $U^{12}$ |
|-------|----------|----------|----------|----------|----------|----------|
| Pd(1) | 39(1)    | 25(1)    | 23(1)    | 1(1)     | 5(1)     | -1(1)    |
| Pd(2) | 25(1)    | 70(1)    | 23(1)    | 14(1)    | 5(1)     | 23(1)    |
| Cl(1) | 68(2)    | 39(1)    | 25(1)    | 8(1)     | -9(1)    | -3(1)    |
| Cl(2) | 109(3)   | 55(2)    | 23(1)    | -3(1)    | 8(1)     | -42(2)   |
| Cl(3) | 52(2)    | 113(3)   | 21(1)    | 11(1)    | 8(1)     | 50(2)    |
| O(1)  | 51(4)    | 27(3)    | 43(4)    | 0(3)     | -3(3)    | 4(3)     |
| O(2)  | 83(7)    | 56(6)    | 71(7)    | 10(5)    | -8(5)    | 18(5)    |
| O(3)  | 80(6)    | 37(4)    | 52(5)    | 6(4)     | 18(4)    | 12(4)    |
| O(4)  | 92(8)    | 73(7)    | 53(6)    | 34(5)    | 22(5)    | 40(6)    |
| N(1)  | 39(4)    | 24(4)    | 25(4)    | -5(3)    | 4(3)     | 2(3)     |
| N(2)  | 49(5)    | 22(4)    | 28(4)    | 0(3)     | 2(3)     | -4(3)    |
| N(3)  | 28(4)    | 63(6)    | 22(4)    | 9(4)     | 8(3)     | 16(4)    |
| N(4)  | 33(5)    | 69(6)    | 15(4)    | 7(4)     | 1(3)     | 24(4)    |
| N(5)  | 41(5)    | 41(5)    | 30(4)    | 7(4)     | 12(3)    | -2(4)    |
| N(6)  | 46(5)    | 24(4)    | 23(4)    | -3(3)    | 6(3)     | -10(3)   |
| N(7)  | 38(5)    | 96(9)    | 25(4)    | 6(5)     | 4(4)     | 41(6)    |
| N(8)  | 19(4)    | 107(9)   | 27(4)    | 27(5)    | 5(3)     | 16(5)    |
| C(1)  | 42(5)    | 32(5)    | 20(4)    | 3(4)     | 8(4)     | 7(4)     |
| C(2)  | 46(6)    | 27(5)    | 28(5)    | 2(4)     | 10(4)    | -13(4)   |
| C(3)  | 41(6)    | 47(6)    | 35(5)    | 5(4)     | 6(4)     | -7(5)    |
| C(4)  | 54(7)    | 44(6)    | 33(5)    | -7(4)    | 7(5)     | -17(5)   |
| C(5)  | 63(7)    | 28(5)    | 31(5)    | -5(4)    | 13(5)    | -14(5)   |
| C(6)  | 55(6)    | 28(5)    | 35(5)    | -1(4)    | 15(5)    | -5(4)    |
| C(7)  | 51(6)    | 30(5)    | 26(5)    | 2(4)     | 7(4)     | -12(4)   |
| C(8)  | 43(6)    | 32(5)    | 37(5)    | 8(4)     | 11(4)    | 8(4)     |
| C(9)  | 57(7)    | 29(5)    | 38(6)    | 7(4)     | 14(5)    | 2(5)     |
| C(10) | 65(8)    | 34(6)    | 44(6)    | 15(5)    | 1(5)     | 11(5)    |
| C(11) | 32(5)    | 68(8)    | 39(6)    | 14(5)    | 15(4)    | 21(5)    |
| C(12) | 42(6)    | 61(7)    | 24(5)    | 16(5)    | 5(4)     | 17(5)    |
| C(13) | 29(5)    | 69(8)    | 21(5)    | 14(5)    | 9(4)     | 25(5)    |
| C(14) | 37(6)    | 70(8)    | 30(5)    | 19(5)    | 11(4)    | 25(5)    |

|        |        |         |         |        |        |        |
|--------|--------|---------|---------|--------|--------|--------|
| C(15)  | 25(5)  | 79(9)   | 36(6)   | 23(6)  | 4(4)   | 28(5)  |
| C(16)  | 33(6)  | 79(9)   | 40(6)   | 14(6)  | 3(5)   | 20(6)  |
| C(17)  | 36(6)  | 78(8)   | 25(5)   | 15(5)  | 6(4)   | 19(5)  |
| C(18)  | 36(6)  | 73(8)   | 20(5)   | 15(5)  | 11(4)  | 20(5)  |
| C(19)  | 32(5)  | 68(7)   | 20(4)   | 12(5)  | 7(4)   | 18(5)  |
| C(20)  | 41(5)  | 26(4)   | 21(4)   | 1(3)   | 1(4)   | 0(4)   |
| C(21)  | 51(6)  | 36(5)   | 20(4)   | -3(4)  | -3(4)  | 8(4)   |
| C(22)  | 42(5)  | 32(5)   | 25(4)   | -13(4) | -2(4)  | -1(4)  |
| C(23)  | 41(5)  | 25(4)   | 31(5)   | 1(4)   | 8(4)   | 5(4)   |
| C(24)  | 52(6)  | 39(5)   | 25(5)   | 7(4)   | -3(4)  | 0(5)   |
| C(25)  | 49(6)  | 28(5)   | 24(4)   | -3(4)  | 0(4)   | -4(4)  |
| C(26)  | 44(6)  | 33(5)   | 62(7)   | 18(5)  | 1(5)   | -1(5)  |
| C(27)  | 33(5)  | 67(8)   | 34(5)   | 26(5)  | 9(4)   | 13(5)  |
| C(28)  | 73(8)  | 55(7)   | 26(5)   | 8(5)   | 10(5)  | 18(6)  |
| C(29)  | 88(11) | 64(9)   | 67(9)   | 24(7)  | 28(8)  | 3(8)   |
| C(30)  | 64(9)  | 72(10)  | 57(8)   | 28(7)  | 24(7)  | 20(7)  |
| C(31)  | 39(7)  | 80(10)  | 93(12)  | 60(9)  | 21(7)  | 22(7)  |
| C(32)  | 38(6)  | 85(9)   | 35(6)   | 20(6)  | 12(5)  | 25(6)  |
| C(33)  | 38(9)  | 44(9)   | 133(19) | 12(11) | 55(11) | -5(8)  |
| C(33') | 38(9)  | 44(9)   | 133(19) | 12(11) | 55(11) | -5(8)  |
| C(34)  | 53(6)  | 24(4)   | 22(4)   | 1(3)   | 6(4)   | -3(4)  |
| C(35)  | 45(6)  | 33(5)   | 30(5)   | -3(4)  | 10(4)  | -7(4)  |
| C(36)  | 39(6)  | 45(6)   | 44(6)   | 5(5)   | 8(5)   | -3(5)  |
| C(37)  | 46(6)  | 53(7)   | 51(7)   | 3(5)   | 10(5)  | -11(5) |
| C(38)  | 77(8)  | 44(6)   | 29(5)   | 0(4)   | 3(5)   | -37(6) |
| C(39)  | 63(7)  | 29(5)   | 51(7)   | 3(5)   | 0(5)   | -3(5)  |
| C(40)  | 48(6)  | 36(5)   | 21(4)   | -5(4)  | 2(4)   | -4(4)  |
| C(41)  | 64(7)  | 25(5)   | 28(5)   | 1(4)   | -5(4)  | -2(4)  |
| C(42)  | 58(7)  | 29(5)   | 44(6)   | 1(4)   | 0(5)   | 9(5)   |
| C(43)  | 50(6)  | 38(6)   | 34(5)   | 4(4)   | -5(5)  | 15(5)  |
| C(44)  | 61(8)  | 73(9)   | 42(6)   | -9(6)  | -7(6)  | 40(7)  |
| C(45)  | 45(7)  | 95(11)  | 35(6)   | 0(6)   | -1(5)  | 35(7)  |
| C(46)  | 31(6)  | 114(12) | 26(5)   | 17(6)  | 4(4)   | 38(7)  |
| C(47)  | 55(8)  | 104(11) | 37(6)   | -3(7)  | -5(5)  | 47(8)  |
| C(48)  | 55(8)  | 128(15) | 43(7)   | -11(8) | -15(6) | 66(10) |
| C(49)  | 35(6)  | 118(14) | 42(7)   | 8(8)   | 6(5)   | 35(8)  |



|       |         |         |         |         |          |          |
|-------|---------|---------|---------|---------|----------|----------|
| C(50) | 33(6)   | 106(11) | 37(6)   | 22(7)   | 9(5)     | 26(6)    |
| C(51) | 40(6)   | 80(9)   | 26(5)   | 18(6)   | 9(4)     | 29(6)    |
| C(52) | 44(6)   | 74(8)   | 26(5)   | 18(5)   | 9(4)     | 37(6)    |
| C(53) | 38(5)   | 44(6)   | 30(5)   | 8(4)    | 17(4)    | 8(4)     |
| C(54) | 49(6)   | 42(6)   | 28(5)   | 4(4)    | 18(4)    | 7(5)     |
| C(55) | 61(7)   | 39(6)   | 47(7)   | 3(5)    | 22(6)    | 5(5)     |
| C(56) | 53(6)   | 28(5)   | 47(6)   | 6(4)    | 20(5)    | 9(5)     |
| C(57) | 51(6)   | 42(6)   | 33(5)   | 8(4)    | 15(5)    | 2(5)     |
| C(58) | 51(6)   | 24(4)   | 26(5)   | -5(4)   | 14(4)    | 3(4)     |
| C(59) | 89(10)  | 31(6)   | 50(7)   | -5(5)   | 1(7)     | 14(6)    |
| C(60) | 32(5)   | 82(9)   | 30(5)   | 28(6)   | 13(4)    | 24(6)    |
| C(61) | 33(6)   | 95(10)  | 31(6)   | 28(6)   | 13(4)    | 22(6)    |
| C(62) | 42(6)   | 74(9)   | 37(6)   | 14(6)   | 15(5)    | 26(6)    |
| C(63) | 50(7)   | 81(10)  | 37(6)   | 17(6)   | 20(5)    | 31(7)    |
| C(64) | 48(7)   | 79(9)   | 40(7)   | 33(6)   | 20(5)    | 37(6)    |
| C(65) | 29(5)   | 108(12) | 34(6)   | 32(7)   | 10(4)    | 29(6)    |
| C(66) | 82(11)  | 73(10)  | 57(9)   | 19(7)   | 5(8)     | 23(8)    |
| Cl(4) | 80(3)   | 86(3)   | 99(3)   | -7(2)   | -31(2)   | -14(2)   |
| Cl(6) | 133(4)  | 73(3)   | 85(3)   | 18(2)   | 34(3)    | 13(3)    |
| Cl(5) | 136(4)  | 58(2)   | 106(4)  | 12(2)   | 1(3)     | -2(3)    |
| Cl(7) | 107(5)  | 121(5)  | 239(9)  | -59(5)  | -40(5)   | 31(4)    |
| C(67) | 49(7)   | 82(10)  | 40(6)   | 8(6)    | 0(5)     | 6(6)     |
| C(68) | 95(13)  | 124(16) | 60(10)  | 17(10)  | 14(9)    | -29(12)  |
| P     | 105(3)  | 51(2)   | 33(2)   | -7(1)   | -7(2)    | 22(2)    |
| F(1)  | 247(15) | 82(7)   | 58(6)   | -33(5)  | 14(7)    | -61(8)   |
| F(2)  | 194(14) | 77(7)   | 202(14) | -37(7)  | -121(12) | 47(8)    |
| F(3)  | 370(20) | 86(8)   | 56(6)   | -23(5)  | -51(10)  | 101(11)  |
| F(4)  | 500(50) | 330(40) | 240(30) | -50(20) | -250(30) | 230(40)  |
| F(5)  | 730(50) | 169(14) | 126(13) | -23(9)  | 100(20)  | -310(30) |
| F(6)  | 220(20) | 560(50) | 143(15) | -50(20) | 119(15)  | -220(30) |

---

Table 5. Hydrogen coordinates (  $\times 10^4$ ) and isotropic displacement parameters ( $\text{\AA}^2 \times 10^{-3}$ ) for 11pd.

|        | x     | y     | z     | U(eq) |
|--------|-------|-------|-------|-------|
| H(3A)  | 12008 | 9009  | 9323  | 51    |
| H(4A)  | 12288 | 10296 | 9415  | 52    |
| H(5A)  | 10961 | 11417 | 9199  | 49    |
| H(6A)  | 9304  | 11308 | 8795  | 49    |
| H(8A)  | 7506  | 10783 | 8818  | 49    |
| H(8B)  | 7225  | 10030 | 8464  | 49    |
| H(9A)  | 8389  | 10259 | 7408  | 53    |
| H(9B)  | 8508  | 11065 | 7760  | 53    |
| H(10A) | 7142  | 11524 | 7058  | 63    |
| H(10B) | 6494  | 11464 | 7817  | 63    |
| H(11A) | 6284  | 10154 | 7447  | 64    |
| H(11B) | 5562  | 10919 | 7075  | 64    |
| H(12A) | 6743  | 10743 | 6042  | 57    |
| H(12B) | 7601  | 10058 | 6415  | 57    |
| H(14A) | 4538  | 11062 | 6041  | 64    |
| H(15A) | 2799  | 10929 | 5737  | 65    |
| H(16A) | 2471  | 9719  | 5498  | 68    |
| H(17A) | 3828  | 8529  | 5567  | 63    |
| H(21A) | 10336 | 7676  | 7989  | 46    |
| H(22A) | 11232 | 6329  | 8054  | 41    |
| H(24A) | 11843 | 6633  | 10090 | 49    |
| H(25A) | 10959 | 7968  | 10005 | 41    |
| H(26A) | 12999 | 4682  | 9609  | 73    |
| H(26B) | 13199 | 5540  | 9779  | 73    |
| H(26C) | 12100 | 5293  | 10090 | 73    |
| H(28A) | 5545  | 7701  | 4902  | 69    |
| H(29A) | 5693  | 6329  | 4867  | 95    |
| H(31A) | 6674  | 6055  | 6835  | 95    |
| H(32A) | 6550  | 7440  | 6897  | 72    |
| H(33A) | 6594  | 4303  | 6441  | 115   |

|        |       |       |      |     |
|--------|-------|-------|------|-----|
| H(33B) | 7339  | 4935  | 6482 | 115 |
| H(33C) | 6149  | 5099  | 6892 | 115 |
| H(33D) | 5854  | 4354  | 5445 | 115 |
| H(33E) | 4980  | 5172  | 5329 | 115 |
| H(33F) | 6148  | 5012  | 4887 | 115 |
| H(36A) | 3796  | 7377  | 8225 | 54  |
| H(37A) | 3609  | 6033  | 8246 | 61  |
| H(38A) | 5053  | 4986  | 8466 | 56  |
| H(39A) | 6727  | 5208  | 8733 | 59  |
| H(41A) | 8193  | 5917  | 9182 | 48  |
| H(41B) | 8708  | 6648  | 8893 | 48  |
| H(42A) | 8377  | 5408  | 8041 | 56  |
| H(42B) | 9534  | 5504  | 8254 | 56  |
| H(43A) | 9310  | 6729  | 7585 | 53  |
| H(43B) | 8186  | 6591  | 7348 | 53  |
| H(44A) | 9130  | 5439  | 6710 | 81  |
| H(44B) | 10261 | 5539  | 6969 | 81  |
| H(45A) | 10066 | 6055  | 5798 | 80  |
| H(45B) | 8949  | 6655  | 6060 | 80  |
| H(47A) | 12029 | 5608  | 6319 | 91  |
| H(48A) | 13816 | 5731  | 6504 | 106 |
| H(49A) | 14217 | 6936  | 6677 | 89  |
| H(50A) | 12857 | 8114  | 6752 | 80  |
| H(54A) | 5662  | 9017  | 9189 | 53  |
| H(55A) | 4707  | 10340 | 8987 | 64  |
| H(57A) | 3568  | 9641  | 7249 | 54  |
| H(58A) | 4551  | 8306  | 7425 | 44  |
| H(59A) | 3075  | 11970 | 8157 | 92  |
| H(59B) | 3284  | 11379 | 8829 | 92  |
| H(59C) | 4291  | 11527 | 8308 | 92  |
| H(61A) | 11306 | 8919  | 7538 | 73  |
| H(62A) | 11311 | 10260 | 7548 | 70  |
| H(64A) | 9736  | 10619 | 5739 | 79  |
| H(65A) | 9878  | 9293  | 5673 | 79  |
| H(66A) | 10899 | 12268 | 7102 | 118 |
| H(66B) | 10628 | 11586 | 7640 | 118 |

|        |       |       |       |     |
|--------|-------|-------|-------|-----|
| H(66C) | 11757 | 11431 | 7154  | 118 |
| H(67A) | 9407  | 2348  | 5689  | 73  |
| H(67B) | 8355  | 2516  | 6247  | 73  |
| H(68A) | 3892  | 6894  | 10659 | 113 |
| H(68B) | 4437  | 6758  | 9859  | 113 |

---
